# Supplementary material for: Climatic history of the northeastern United States during the past 3000 years
Source: Copernicus journal article supplement (doi:10.5194/cp-2016-104), 2016-11-02
Supplement: Supplementary file 1 [file cp-2016-104-supplement.zip]

## **Supplement: Climatic history of the northeastern United States during the past 3000 years**

Jennifer R. Marlon<sup>1\*</sup>, Neil Pederson<sup>2</sup>, Connor Nolan<sup>3</sup>, Simon Goring<sup>4</sup>, Bryan Shuman<sup>5</sup>, Robert Booth<sup>6</sup>, Patrick J. Bartlein<sup>7</sup>, Melissa A. Berke<sup>8</sup>, Michael Clifford<sup>9</sup>, Edward Cook<sup>10</sup>, Ann Dieffenbacher-Krall<sup>11</sup>, Michael C. Dietze<sup>12</sup>, Amy Hessl<sup>13</sup>, J. Bradford Hubeny<sup>14</sup>, Stephen T. Jackson<sup>3,15</sup>, Jeremiah Marsicek<sup>5</sup>, Jason McLachlan<sup>16</sup>, Cary J. Mock<sup>17</sup>, David J.P. Moore<sup>18</sup>, Jonathan Nichols<sup>19</sup>, Ann Robertson<sup>1</sup>, Kevin Schaefer<sup>20</sup>, Valerie Trouet<sup>21</sup>, Charles Umbanhowar<sup>22</sup>, John W. Williams<sup>4</sup>, Zicheng Yu<sup>6</sup>

<sup>1</sup>Yale School of Forestry and Environmental Studies, CT 06511, USA

<sup>2</sup>Harvard Forest, Harvard University, MA 01366, USA

<sup>3</sup>Department of Geosciences, University of Arizona, AZ 85721, USA

<sup>4</sup>Department of Geography, Center for Climatic Research, University of Wisconsin-Madison, WI 53706, USA

<sup>5</sup>Department of Geology and Geophysics, University of Wyoming, WY 82071, USA

<sup>6</sup>Earth and Environmental Science Department, Lehigh University, PA 18015, USA

<sup>7</sup>Department of Geography, University of Oregon, OR 97108, USA

<sup>8</sup>Department of Civil and Environmental Engineering and Earth Sciences, University of Notre Dame, IN 46556, USA

<sup>9</sup>Division of Earth and Ecosystem Sciences, Desert Research Institute in Las Vegas, NV 89119, USA

<sup>10</sup>Tree-Ring Laboratory, Lamont-Doherty Earth Observatory, NY 10964, USA

<sup>11</sup>School of Biology and Ecology, University of Maine, ME 04469 USA

<sup>12</sup>Department of Earth and Environment, Boston University, MA, 02215 USA

<sup>13</sup>Department of Geology and Geography, West Virginia University, WV 26501, USA

<sup>14</sup>Department of Geological Sciences, Salem State University, Salem, MA 01970, USA

<sup>15</sup>Southwest Climate Science Center, US Geological Survey, Tucson, AZ 85719, USA

<sup>16</sup>Department of Biological Sciences, University of Notre Dame, IN 46556, USA

<sup>17</sup>Department of Geography, University of South Carolina, SC 29208, USA

<sup>18</sup>Department of Geosciences and School of Natural Resources and Environment, University of Arizona, Tucson, AZ 85721, USA

<sup>19</sup>Biology and Paleo Environment, Lamont-Doherty Earth Observatory, NY 10964, USA

<sup>20</sup>Snow and Ice Data Center, CIRES, University of Colorado, CO 80309, USA

<sup>21</sup>Laboratory of Tree-Ring Research, University of Arizona, AZ 85721, USA

<sup>22</sup>Department of Biology, St. Olaf College, MN 55057, USA

\*Correspondence: J.R. Marlon (jennifer.marlon@yale.edu)

Following are the site locations for Figure 1 in the main text (top panel: sites by proxy type). Temperature data for Figure 5 and hydroclimate data for Figure 7 are available for download in Excel format.

Supplementary Table 1. Paleoclimate sites used in this study.

| <i>Site</i>                      | <i>Lat.</i> | <i>Long.</i> | <i>Data Type</i>   | <i>Source</i>   | <i>Citation</i>            |
|----------------------------------|-------------|--------------|--------------------|-----------------|----------------------------|
| Great Heath, ME                  | 44.70       | -67.81       | Testate Amoeba     | Bog sediment    | Clifford and Booth (2013)  |
| Hole Bog, MN                     | 47.30       | -94.25       | Testate Amoeba     | Bog sediment    | Booth et al. (2006)        |
| Irwin Smith Bog, MI              | 45.03       | -83.62       | Testate Amoeba     | Bog sediment    | Booth et al. (2012)        |
| Minden Bog, MI                   | 43.62       | -82.84       | Testate Amoeba     | Bog sediment    | Booth et al. (2003)        |
| Pinhook Bog, IN                  | 41.61       | 86.85        | Testate Amoeba     | Bog sediment    | Booth et al. (2012)        |
| Saco Bog, ME                     | 43.55       | -70.46       | Testate Amoeba     | Bog sediment    | Clifford and Booth (2013)  |
| Sidney Bog, ME                   | 44.39       | -69.78       | Testate Amoeba     | Bog sediment    | Clifford and Booth (2013)  |
| South Rhody Bog, MI              | 46.56       | 86.07        | Testate Amoeba     | Bog sediment    | Booth et al. (2012)        |
| White Lake, NJ                   | 41.00       | -74.80       | IRM                | Lake sediment   | Li et al. (2007)           |
|                                  |             |              | Sphagnum/ Vascular |                 |                            |
| The Great Heath, ME              | 44.70       | -67.81       | Ratio              | Lake sediment   | Nichols and Huang (2012)   |
| Davis Pond, MA                   | 42.14       | -73.40       | Lake Level         | Lake sediment   | Newby et al. (2014)        |
| Deep Pond, MA                    | 41.56       | -70.64       | Lake Level         | Lake sediment   | Marsicek et al. (2013)     |
| New Long Pond, MA                | 41.85       | -70.71       | Lake Level         | Lake sediment   | Newby et al. (2014)        |
| Mathews Pond, ME                 | 43.27       | -70.86       | Lake Level         | Lake sediment   | Dieffenbacher-Krall (2005) |
| Whitehead Lake, ME               | 46.46       | -67.86       | Lake Level         | Lake sediment   | Dieffenbacher-Krall (2005) |
| Green Lake, NY                   | 43.05       | -75.97       | Varve thickness    | Lake sediment   | Hubeny et al. (2014)       |
| Pettaquamscutt River Estuary, RI | 41.50       | -71.45       | Varve thickness    | Lake sediment   | Hubeny et al. (2014)       |
| Emerald Basin                    | 45.89       | -62.80       | Alkenones          | Marine sediment | Keigwin et al. (2011)      |
| Scotian Margin                   | 44.00       | -63.00       | Alkenones          | Marine sediment | Sachs et al. (2007)        |

## References

- Booth, R. K. and Jackson, S. T.: A high resolution record of late Holocene moisture variability from a Michigan raised bog, *The Holocene*, 2003. 2003.
- Booth, R. K., Jackson, S. T., Sousa, V. A., Sullivan, M. E., Minckley, T. A., and Clifford, M. J.: Multi-decadal drought and amplified moisture variability drove rapid forest community change in a humid region, *Ecology*, 93, 219-226, 2012.
- Booth, R. K., Notaro, M., Jackson, S. T., and Kutzbach, J. T.: Widespread drought episodes in the western Great Lakes region during the past 2000 years: geological extent and potential mechanisms, *Earth and Planetary Science Letters*, 242, 415–427, 2006.
- Clifford, M. and Booth, R.: Increased probability of fire during late Holocene droughts in northern New England, *Climatic Change*, 119, 693-704, 2013.
- Dieffenbacher-Krall, A. C. and Nurse, A. M.: Late-glacial and Holocene record of lake levels of Mathews Pond and Whitehead Lake, northern Maine, USA, *Journal of Paleolimnology*, 34, 283-309, 2005.
- Hubeny, B. J., King, J. W., and Reddin, M.: Northeast US precipitation variability and North American climate teleconnections interpreted from late Holocene varved sediments, *Proceedings of the National Academy of Sciences*, 108, 17895-17900, 2011.

- Keigwin, L. D., Sachs, J. P., and Rosenthal, Y.: A 1600-year history of the Labrador Current off Nova Scotia, *Climate Dynamics*, 21, 53-62, 2003.
- Li, Y.-X., Zicheng, Y., and Kodama, K. P.: Sensitive moisture response to Holocene millennial-scale climate variations in the Mid-Atlantic region, USA, *The Holocene*, 1, 3-8, 2007.
- Newby, P. E., Shuman, B. N., Donnelly, J. P., Karnauskas, K. B., and Marsicek, J.: Centennial-to-millennial hydrologic trends and variability along the North Atlantic Coast, USA, during the Holocene, *Geophysical Research Letters*, 41, 2014GL060183, 2014.
- Nichols, J. E. and Huang, Y.: Hydroclimate of the northeastern United States is highly sensitive to solar forcing, *Geophysical Research Letters*, 39, 2012.
- Sachs, J. P.: Cooling of Northwest Atlantic slope waters during the Holocene, *Geophysical Research Letters*, 34, 2007.
