# Supplementary material for: Climatic history of the northeastern United States during the past 3000 years
Source: Copernicus journal article supplement (doi:10.5194/cp-2016-104), 2016-11-02
Supplement: Supplementary file 1 [file fig_hydro_AllData_10Oct2016.xlsx]

## Sheet: README
README
These data are from:
Marlon, J.R., Pederson, N., Nolan, C., Goring, S., Shuman, B., Booth, R., Bartlein, P.J., Berke, M.A., Clifford, M., Cook, E., Dieffenbacher-Krall, A., Dietze, M.C., Hessl, A., Hubeny, J.B., Jackson, S.T., Marsicek, J., McLachlan, J., Mock, C.J., Moore, D.J.P, Nichols, J., Robertson, A., Schaefer, K., Trouet, V., Umbanhowar, C., Williams, J.W., and Yu, Z. (2016) Climatic history of the northeaste…
	FIGURE
A_PDSlv3_avgNewEng	(A) PDSI [tree rings] N Atlantic US coast (Cook, 2010)
A_PDSIv3_avgUppMid	(A) PDSI [tree rings] Midwestern US (Cook, 2010)
B_varves_locfit	(B) Drought Index [varve thickness] (Hubeny et al., 2011)
C_GreatHeath	(C) Drought events [testate amoeba in bogs] (Clifford and Booth, 2013)
C_IrwinSmith	(C) Drought events [testate amoeba in bogs] (Clifford and Booth, 2013)
C_Minden	(C) Drought events [testate amoeba in bogs] (Clifford and Booth, 2013)
C_Pinhook	(C) Drought events [testate amoeba in bogs] (Clifford and Booth, 2013)
C_Saco	(C) Drought events [testate amoeba in bogs] (Clifford and Booth, 2013)
C_Sidney	(C) Drought events [testate amoeba in bogs] (Clifford and Booth, 2013)
C_SouthRhody	(C) Drought events [testate amoeba in bogs] (Clifford and Booth, 2013)
D_Nichols great heath	(D) Great Heath Bog SVR (Nichols and Huang, 2012)
D_Nichols_TGH_locfit200	(D) Great Heath Bog SVR (Nichols and Huang, 2012)
E_Zicheng WL-IRMs	(E) Isothermal Remanent Magnetization (IRM) (Li et al., 2007)
F_Llrecons_NewEngland_050415	(E) [lake sediment] (Li et al, 2007)
F_Matthews	(F) Estimated lake levels (Dieffenbacher and Nurse, 2005)
F_Whitehead	(F) Estimated lake levels (Dieffenbacher and Nurse, 2005)
For more information contact:
Jennifer R. Marlon
Email: jennifer.marlon@yale.edu

## Sheet: A_PDSIv3_avgNewEng
year	ncnt	annual	X10yrmn	X20yrmn	X30yrmn	X50yrmn	X100yrmn
525	16	1.114	0.099	0.167	0.033	-0.15	-0.379
526	16	0.913	0.105	0.288	0.095	-0.15	-0.376
527	16	-0.932	0.14	0.398	0.145	-0.154	-0.374
528	16	-3.386	0.397	0.5	0.18	-0.164	-0.372
529	16	3.185	0.88	0.583	0.197	-0.18	-0.371
530	16	3.642	1.232	0.616	0.188	-0.202	-0.37
531	16	-0.63	1.3	0.579	0.15	-0.231	-0.37
532	16	1.659	1.191	0.478	0.083	-0.265	-0.369
533	16	0.736	0.886	0.315	-0.011	-0.306	-0.369
534	16	2.569	0.361	0.099	-0.127	-0.351	-0.369
535	16	-1.055	-0.355	-0.15	-0.26	-0.398	-0.369
536	16	-1.232	-1.025	-0.4	-0.399	-0.447	-0.369
537	16	-4.196	-1.433	-0.62	-0.536	-0.495	-0.368
538	16	-1.021	-1.474	-0.792	-0.663	-0.54	-0.367
539	16	0.178	-1.324	-0.925	-0.78	-0.582	-0.366
540	16	-1.498	-1.144	-1.031	-0.886	-0.619	-0.364
541	16	-1.924	-0.937	-1.117	-0.979	-0.652	-0.361
542	16	-0.328	-0.731	-1.192	-1.059	-0.679	-0.357
543	16	-0.024	-0.652	-1.271	-1.127	-0.699	-0.353
544	16	0.332	-0.796	-1.36	-1.182	-0.713	-0.347
545	16	-1.137	-1.152	-1.456	-1.223	-0.72	-0.341
546	16	-2.065	-1.578	-1.541	-1.244	-0.719	-0.334
547	16	-2.571	-1.911	-1.591	-1.24	-0.71	-0.326
548	16	-3.112	-2.057	-1.591	-1.207	-0.691	-0.316
549	16	-0.454	-2.028	-1.531	-1.146	-0.663	-0.306
550	16	-3.167	-1.925	-1.414	-1.056	-0.627	-0.295
551	16	-0.386	-1.744	-1.24	-0.94	-0.582	-0.283
552	16	-1.997	-1.534	-1.017	-0.803	-0.532	-0.27
553	16	0.101	-1.245	-0.752	-0.649	-0.475	-0.256
554	16	-3.36	-0.809	-0.457	-0.484	-0.415	-0.242
555	16	-1.048	-0.092	-0.142	-0.314	-0.353	-0.228
556	16	0.369	0.782	0.161	-0.149	-0.29	-0.213
557	16	4.093	1.514	0.411	0	-0.229	-0.198
558	16	2.993	1.804	0.574	0.123	-0.172	-0.184
559	16	1.592	1.64	0.643	0.216	-0.119	-0.17
560	16	-0.065	1.198	0.634	0.282	-0.073	-0.156
561	16	0.802	0.65	0.572	0.325	-0.031	-0.142
562	16	2.282	0.037	0.481	0.35	0.006	-0.129
563	16	0.152	-0.558	0.387	0.363	0.038	-0.116
564	16	-7.475	-0.796	0.326	0.372	0.066	-0.104
565	16	-0.908	-0.379	0.326	0.383	0.091	-0.092
566	16	3.684	0.301	0.36	0.393	0.112	-0.081
567	16	3.527	0.712	0.387	0.393	0.128	-0.07
568	16	0.158	0.731	0.388	0.381	0.14	-0.06
569	16	-0.545	0.603	0.373	0.36	0.146	-0.051
570	16	-2.197	0.555	0.351	0.333	0.149	-0.042
571	16	3.337	0.609	0.322	0.299	0.148	-0.034
572	16	-0.264	0.542	0.273	0.258	0.143	-0.026
573	16	2.771	0.322	0.206	0.211	0.134	-0.02
574	16	-1.776	-0.032	0.128	0.159	0.123	-0.014
575	16	0.257	-0.313	0.057	0.109	0.111	-0.008
576	16	-2.582	-0.417	0.005	0.062	0.097	-0.003
577	16	0.345	-0.282	-0.021	0.02	0.083	0.001
578	16	-1.197	-0.041	-0.032	-0.017	0.069	0.005
579	16	2.984	0.154	-0.042	-0.051	0.055	0.008
580	16	0.423	0.119	-0.066	-0.087	0.041	0.011
581	16	-0.326	-0.057	-0.103	-0.121	0.027	0.013
582	16	-2.037	-0.187	-0.142	-0.153	0.015	0.015
583	16	0.213	-0.153	-0.176	-0.179	0.003	0.017
584	16	-0.203	-0.025	-0.211	-0.2	-0.007	0.018
585	16	-0.239	0.11	-0.252	-0.217	-0.015	0.018
586	16	1.251	0.149	-0.305	-0.23	-0.021	0.018
587	16	1.774	-0.024	-0.374	-0.239	-0.026	0.017
588	16	-2.711	-0.371	-0.445	-0.242	-0.029	0.017
589	16	0.235	-0.704	-0.497	-0.234	-0.029	0.015
590	16	-0.583	-1.002	-0.515	-0.212	-0.026	0.014
591	16	-2.598	-1.199	-0.484	-0.173	-0.021	0.011
592	16	-1.172	-1.197	-0.393	-0.118	-0.013	0.009
593	16	0.836	-1.031	-0.245	-0.049	-0.002	0.006
594	16	-2.238	-0.722	-0.049	0.031	0.01	0.002
595	16	-3.184	-0.136	0.187	0.117	0.023	-0.002
596	16	2.931	0.673	0.437	0.2	0.034	-0.007
597	16	1.399	1.355	0.654	0.269	0.044	-0.012
598	16	4.526	1.714	0.804	0.315	0.049	-0.019
599	16	1.371	1.694	0.866	0.331	0.049	-0.026
600	16	-1.295	1.519	0.847	0.319	0.045	-0.035
601	16	1.185	1.385	0.757	0.282	0.035	-0.044
602	16	3.773	1.177	0.598	0.219	0.022	-0.055
603	16	0.486	0.756	0.373	0.135	0.004	-0.066
604	16	-0.21	0.242	0.107	0.038	-0.016	-0.078
605	16	-1.84	-0.22	-0.169	-0.064	-0.037	-0.091
606	16	-1.264	-0.581	-0.428	-0.161	-0.059	-0.104
607	16	2.94	-0.988	-0.657	-0.248	-0.08	-0.119
608	16	-1.235	-1.6	-0.844	-0.319	-0.098	-0.133
609	16	-3.228	-2.177	-0.958	-0.365	-0.114	-0.149
610	16	-4.589	-2.366	-0.965	-0.381	-0.126	-0.164
611	16	-4.219	-1.969	-0.854	-0.363	-0.134	-0.18
612	16	-0.588	-1.108	-0.648	-0.316	-0.138	-0.197
613	16	2.082	-0.181	-0.396	-0.253	-0.14	-0.214
614	16	2.511	0.468	-0.147	-0.187	-0.142	-0.231
615	16	-1.443	0.796	0.067	-0.126	-0.145	-0.25
616	16	1.731	0.974	0.237	-0.075	-0.15	-0.269
617	16	1.09	1.011	0.347	-0.04	-0.159	-0.289
618	16	0.477	0.941	0.393	-0.024	-0.171	-0.309
619	16	1.793	0.813	0.376	-0.028	-0.187	-0.331
620	16	-1.255	0.655	0.303	-0.05	-0.206	-0.353
621	16	0.643	0.535	0.184	-0.09	-0.23	-0.377
622	16	0.998	0.351	0.027	-0.143	-0.256	-0.401
623	16	0.963	-0.021	-0.162	-0.208	-0.286	-0.425
624	16	0.791	-0.607	-0.365	-0.278	-0.318	-0.451
625	16	-1.183	-1.28	-0.557	-0.348	-0.351	-0.476
626	16	-3.45	-1.74	-0.7	-0.408	-0.384	-0.503
627	16	-5.86	-1.684	-0.767	-0.452	-0.417	-0.529
628	16	-2.695	-1.091	-0.755	-0.477	-0.448	-0.556
629	16	6.195	-0.464	-0.704	-0.492	-0.479	-0.583
630	16	3.161	-0.403	-0.662	-0.506	-0.512	-0.611
631	16	-4.043	-0.77	-0.63	-0.521	-0.545	-0.639
632	16	-3.704	-0.967	-0.578	-0.531	-0.579	-0.667
633	16	-2.075	-0.712	-0.498	-0.537	-0.613	-0.695
634	16	-0.176	-0.132	-0.409	-0.542	-0.649	-0.724
635	16	1.7	0.435	-0.346	-0.556	-0.686	-0.753
636	16	3.348	0.642	-0.341	-0.586	-0.727	-0.782
637	16	1.438	0.345	-0.407	-0.635	-0.77	-0.811
638	16	-2.103	-0.259	-0.527	-0.699	-0.816	-0.84
639	16	-1.648	-0.838	-0.667	-0.772	-0.863	-0.869
640	18	-2.15	-1.242	-0.804	-0.848	-0.911	-0.899
641	18	-0.188	-1.479	-0.923	-0.924	-0.959	-0.927
642	18	-1.317	-1.638	-1.023	-0.999	-1.006	-0.956
643	18	-3.197	-1.687	-1.096	-1.07	-1.051	-0.984
644	18	-0.161	-1.569	-1.141	-1.136	-1.096	-1.012
645	18	-2.407	-1.338	-1.168	-1.198	-1.138	-1.04
646	18	-1.504	-0.968	-1.187	-1.258	-1.178	-1.066
647	18	-1.321	-0.524	-1.214	-1.317	-1.217	-1.093
648	18	-0.532	-0.173	-1.272	-1.379	-1.254	-1.118
649	18	2.707	-0.187	-1.38	-1.448	-1.29	-1.143
650	18	3.163	-0.823	-1.549	-1.522	-1.324	-1.168
651	18	-3.349	-1.943	-1.753	-1.597	-1.355	-1.191
652	18	-6.206	-2.955	-1.93	-1.658	-1.382	-1.214
653	18	-4.849	-3.395	-2.032	-1.694	-1.403	-1.235
654	18	-3.745	-3.21	-2.041	-1.702	-1.418	-1.256
655	18	-2.76	-2.597	-1.971	-1.684	-1.427	-1.275
656	18	-0.157	-1.851	-1.85	-1.646	-1.432	-1.293
657	18	-1.055	-1.252	-1.713	-1.596	-1.432	-1.31
658	18	-0.819	-0.907	-1.583	-1.541	-1.431	-1.327
659	18	0.946	-0.852	-1.475	-1.485	-1.427	-1.342
660	18	-1.044	-1.065	-1.395	-1.431	-1.423	-1.356
661	18	-3.225	-1.333	-1.33	-1.379	-1.419	-1.37
662	18	-1.758	-1.443	-1.266	-1.327	-1.414	-1.383
663	18	-1.163	-1.387	-1.199	-1.277	-1.41	-1.395
664	18	-1.703	-1.232	-1.132	-1.231	-1.406	-1.406
665	18	-0.686	-1.045	-1.072	-1.19	-1.404	-1.416
666	18	-0.067	-0.924	-1.025	-1.159	-1.405	-1.426
667	18	-1.498	-0.92	-0.996	-1.139	-1.408	-1.434
668	18	0.899	-1.002	-0.984	-1.13	-1.414	-1.442
669	18	-3.403	-1.126	-0.987	-1.133	-1.423	-1.45
670	18	-1.179	-1.125	-0.994	-1.145	-1.435	-1.456
671	18	-0.82	-1.021	-1.008	-1.168	-1.45	-1.462
672	18	-0.723	-0.895	-1.038	-1.202	-1.467	-1.467
673	18	-1.317	-0.806	-1.088	-1.247	-1.488	-1.471
674	18	-0.11	-0.8	-1.164	-1.305	-1.511	-1.475
675	18	-0.688	-0.956	-1.269	-1.373	-1.536	-1.477
676	18	0.031	-1.287	-1.399	-1.45	-1.563	-1.479
677	18	-1.441	-1.726	-1.542	-1.532	-1.59	-1.479
678	18	-5.204	-2.055	-1.676	-1.613	-1.616	-1.479
679	18	-2.74	-2.075	-1.783	-1.686	-1.64	-1.477
680	18	-0.089	-1.921	-1.866	-1.752	-1.662	-1.475
681	18	-1.319	-1.835	-1.94	-1.811	-1.682	-1.47
682	18	-1.938	-1.87	-2.008	-1.862	-1.698	-1.465
683	18	-2.124	-1.981	-2.066	-1.904	-1.71	-1.459
684	18	-2.332	-2.118	-2.108	-1.936	-1.718	-1.451
685	18	-1.824	-2.258	-2.13	-1.955	-1.721	-1.441
686	18	-1.912	-2.387	-2.128	-1.96	-1.718	-1.431
687	18	-4.325	-2.443	-2.096	-1.951	-1.711	-1.419
688	18	-1.333	-2.351	-2.031	-1.928	-1.697	-1.406
689	18	-1.184	-2.193	-1.941	-1.893	-1.678	-1.391
690	18	-4.186	-1.967	-1.834	-1.848	-1.654	-1.375
691	18	-1.918	-1.598	-1.713	-1.795	-1.625	-1.358
692	18	-0.042	-1.225	-1.599	-1.74	-1.592	-1.34
693	18	0.773	-1.043	-1.512	-1.687	-1.556	-1.321
694	18	-1.743	-1.09	-1.461	-1.638	-1.516	-1.301
695	18	-2.064	-1.199	-1.436	-1.593	-1.474	-1.28
696	18	-1.975	-1.247	-1.43	-1.549	-1.43	-1.259
697	18	-1.16	-1.235	-1.436	-1.504	-1.382	-1.236
698	18	-0.18	-1.263	-1.456	-1.46	-1.332	-1.213
699	18	-0.878	-1.411	-1.485	-1.413	-1.28	-1.19
700	18	-2.038	-1.632	-1.513	-1.361	-1.225	-1.166
701	18	-1.833	-1.808	-1.519	-1.3	-1.168	-1.141
702	18	-3.352	-1.846	-1.49	-1.226	-1.108	-1.116
703	18	-2.549	-1.709	-1.416	-1.139	-1.047	-1.091
704	18	0.6	-1.537	-1.303	-1.039	-0.983	-1.065
705	18	0.941	-1.54	-1.163	-0.93	-0.919	-1.04
706	18	-2.502	-1.666	-0.995	-0.814	-0.856	-1.014
707	18	-4.913	-1.569	-0.784	-0.69	-0.792	-0.989
708	18	-1.659	-1.015	-0.526	-0.559	-0.731	-0.964
709	18	-0.097	-0.153	-0.251	-0.431	-0.672	-0.939
710	18	1.694	0.715	-0.001	-0.315	-0.618	-0.915
711	18	3.07	1.3	0.183	-0.223	-0.57	-0.891
712	18	1.178	1.463	0.278	-0.16	-0.53	-0.869
713	18	1.641	1.269	0.281	-0.128	-0.498	-0.847
714	18	1.096	0.805	0.204	-0.124	-0.475	-0.827
715	18	-0.115	0.2	0.07	-0.144	-0.458	-0.807
716	18	-1.588	-0.387	-0.091	-0.179	-0.447	-0.788
717	18	0.072	-0.852	-0.251	-0.223	-0.442	-0.77
718	18	-1.261	-1.202	-0.39	-0.27	-0.441	-0.753
719	18	-1.129	-1.379	-0.491	-0.315	-0.443	-0.737
720	18	-3.691	-1.301	-0.544	-0.353	-0.448	-0.721
721	18	-0.523	-0.924	-0.547	-0.384	-0.455	-0.706
722	18	0.351	-0.435	-0.523	-0.41	-0.464	-0.692
723	18	-0.539	-0.021	-0.495	-0.435	-0.476	-0.678
724	18	1.373	0.209	-0.482	-0.464	-0.49	-0.665
725	18	1.075	0.142	-0.501	-0.498	-0.506	-0.653
726	18	0.184	-0.2	-0.55	-0.538	-0.524	-0.642
727	18	-1.371	-0.662	-0.616	-0.58	-0.543	-0.631
728	18	-0.658	-1.041	-0.678	-0.62	-0.563	-0.62
729	18	-4.59	-1.188	-0.72	-0.654	-0.581	-0.61
730	18	0.5	-1.021	-0.733	-0.681	-0.599	-0.6
731	18	-0.227	-0.762	-0.731	-0.703	-0.615	-0.591
732	18	-0.956	-0.549	-0.725	-0.723	-0.63	-0.582
733	18	0.22	-0.438	-0.722	-0.742	-0.644	-0.573
734	18	-0.227	-0.494	-0.727	-0.762	-0.656	-0.564
735	18	-0.433	-0.717	-0.739	-0.782	-0.666	-0.556
736	18	-0.552	-1.056	-0.754	-0.801	-0.675	-0.548
737	18	0.831	-1.41	-0.76	-0.818	-0.681	-0.54
738	18	-6.291	-1.561	-0.744	-0.83	-0.683	-0.531
739	18	-2.977	-1.167	-0.692	-0.834	-0.683	-0.523
740	18	0.282	-0.367	-0.625	-0.833	-0.679	-0.515
741	18	2.424	0.409	-0.586	-0.835	-0.672	-0.508
742	18	1.803	0.799	-0.615	-0.847	-0.665	-0.5
743	18	-0.176	0.697	-0.721	-0.87	-0.656	-0.492
744	18	3.236	0.13	-0.897	-0.9	-0.645	-0.485
745	18	-1.451	-0.861	-1.119	-0.93	-0.632	-0.477
746	18	-0.99	-1.947	-1.336	-0.948	-0.615	-0.47
747	18	-7.681	-2.758	-1.492	-0.941	-0.593	-0.462
748	18	-2.094	-2.964	-1.54	-0.898	-0.564	-0.454
749	18	-2.139	-2.702	-1.473	-0.819	-0.529	-0.446
750	18	-2.905	-2.132	-1.299	-0.705	-0.49	-0.438
751	18	-4.273	-1.35	-1.034	-0.563	-0.446	-0.431
752	18	6.396	-0.597	-0.709	-0.403	-0.4	-0.423
753	18	-2.57	-0.255	-0.371	-0.237	-0.355	-0.415
754	18	1.12	-0.114	-0.025	-0.071	-0.311	-0.408
755	18	-2.018	0.007	0.32	0.086	-0.271	-0.402
756	18	1.148	0.306	0.656	0.229	-0.236	-0.396
757	18	-0.623	0.823	0.962	0.349	-0.208	-0.391
758	18	0.601	1.597	1.215	0.437	-0.187	-0.386
759	18	2.597	2.511	1.38	0.483	-0.175	-0.383
760	18	0.645	3.31	1.418	0.479	-0.175	-0.381
761	18	7.493	3.654	1.296	0.419	-0.185	-0.379
762	18	9.217	3.026	0.989	0.3	-0.207	-0.379
763	18	-0.104	1.402	0.522	0.13	-0.239	-0.38
764	18	-2.357	-0.54	-0.017	-0.067	-0.277	-0.382
765	18	-4.482	-2.166	-0.532	-0.267	-0.318	-0.383
766	18	-2.909	-3.127	-0.953	-0.45	-0.359	-0.386
767	18	-5.597	-3.359	-1.24	-0.603	-0.396	-0.388
768	18	-4.11	-2.89	-1.381	-0.718	-0.429	-0.39
769	18	-0.684	-2.011	-1.399	-0.796	-0.456	-0.392
770	18	1.234	-1.16	-1.342	-0.846	-0.479	-0.395
771	18	-1.197	-0.608	-1.25	-0.873	-0.498	-0.397
772	18	0.201	-0.357	-1.15	-0.884	-0.512	-0.399
773	18	1.617	-0.397	-1.058	-0.881	-0.523	-0.401
774	18	-2.455	-0.617	-0.979	-0.867	-0.531	-0.403
775	18	-3.043	-0.736	-0.9	-0.842	-0.535	-0.405
776	18	0.692	-0.668	-0.818	-0.806	-0.535	-0.407
777	18	-0.606	-0.58	-0.743	-0.762	-0.532	-0.408
778	18	-0.28	-0.559	-0.677	-0.714	-0.526	-0.41
779	18	0.828	-0.65	-0.621	-0.663	-0.518	-0.412
780	18	-2.03	-0.834	-0.568	-0.61	-0.508	-0.414
781	18	-0.886	-0.96	-0.506	-0.554	-0.496	-0.416
782	18	-0.062	-0.962	-0.428	-0.495	-0.484	-0.418
783	18	-2.985	-0.775	-0.334	-0.435	-0.47	-0.42
784	18	-1.92	-0.294	-0.224	-0.376	-0.456	-0.423
785	18	1.081	0.336	-0.118	-0.321	-0.442	-0.425
786	18	4.725	0.763	-0.051	-0.28	-0.43	-0.428
787	18	-1.729	0.776	-0.044	-0.256	-0.422	-0.431
788	18	2.506	0.526	-0.088	-0.249	-0.416	-0.435
789	18	-0.383	0.06	-0.172	-0.255	-0.412	-0.439
790	18	-1.511	-0.446	-0.273	-0.27	-0.411	-0.443
791	18	-0.308	-0.839	-0.365	-0.287	-0.412	-0.448
792	18	-1.165	-1.072	-0.433	-0.303	-0.413	-0.453
793	18	-3.735	-1.075	-0.462	-0.314	-0.415	-0.459
794	18	0.508	-0.844	-0.449	-0.32	-0.418	-0.464
795	18	0.534	-0.615	-0.412	-0.323	-0.421	-0.47
796	18	1.154	-0.525	-0.364	-0.327	-0.426	-0.477
797	18	-2.393	-0.515	-0.311	-0.333	-0.433	-0.483
798	18	-1.136	-0.366	-0.249	-0.34	-0.44	-0.49
799	18	-1.381	-0.034	-0.188	-0.35	-0.449	-0.498
800	18	2.192	0.363	-0.146	-0.369	-0.46	-0.506
801	18	0.936	0.594	-0.151	-0.4	-0.473	-0.514
802	18	0.811	0.592	-0.212	-0.445	-0.489	-0.523
803	18	-0.32	0.377	-0.328	-0.503	-0.506	-0.532
804	18	0.924	-0.014	-0.488	-0.57	-0.525	-0.541
805	18	0.113	-0.589	-0.677	-0.641	-0.544	-0.551
806	18	-0.016	-1.258	-0.871	-0.71	-0.563	-0.561
807	18	-5.475	-1.801	-1.037	-0.769	-0.58	-0.571
808	18	-1.928	-1.947	-1.14	-0.808	-0.593	-0.581
809	18	-2.557	-1.773	-1.177	-0.826	-0.603	-0.591
810	18	0.45	-1.47	-1.157	-0.824	-0.61	-0.602
811	18	-0.593	-1.261	-1.097	-0.807	-0.614	-0.612
812	18	-0.72	-1.171	-1.007	-0.776	-0.616	-0.623
813	18	-2.164	-1.096	-0.889	-0.733	-0.615	-0.633
814	18	-1.585	-0.893	-0.744	-0.682	-0.613	-0.644
815	18	-1.535	-0.54	-0.583	-0.625	-0.61	-0.655
816	18	1.411	-0.138	-0.426	-0.569	-0.607	-0.667
817	18	0.119	0.132	-0.298	-0.522	-0.605	-0.678
818	18	1.981	0.221	-0.211	-0.487	-0.605	-0.69
819	18	-1.289	0.166	-0.171	-0.467	-0.608	-0.703
820	18	-1.801	0.149	-0.167	-0.461	-0.614	-0.716
821	18	0.326	0.196	-0.198	-0.469	-0.621	-0.729
822	18	4.764	0.094	-0.273	-0.492	-0.632	-0.743
823	18	-2.176	-0.283	-0.391	-0.531	-0.646	-0.757
824	18	-4.283	-0.624	-0.522	-0.577	-0.661	-0.771
825	18	1.678	-0.788	-0.645	-0.626	-0.678	-0.786
826	18	-0.048	-0.998	-0.762	-0.676	-0.696	-0.8
827	18	-1.742	-1.291	-0.866	-0.724	-0.714	-0.815
828	18	-0.622	-1.555	-0.942	-0.767	-0.732	-0.831
829	18	-2.591	-1.675	-0.98	-0.8	-0.75	-0.846
830	18	-4.242	-1.473	-0.97	-0.822	-0.767	-0.861
831	18	-1.775	-0.916	-0.919	-0.834	-0.783	-0.876
832	18	2.593	-0.304	-0.859	-0.842	-0.799	-0.892
833	18	1.127	-0.021	-0.827	-0.852	-0.816	-0.907
834	18	0.567	-0.145	-0.836	-0.869	-0.834	-0.923
835	18	-0.969	-0.541	-0.878	-0.89	-0.853	-0.938
836	18	-2.67	-0.979	-0.934	-0.912	-0.873	-0.954
837	18	-0.204	-1.301	-0.984	-0.931	-0.893	-0.969
838	18	-2.238	-1.508	-1.02	-0.946	-0.913	-0.984
839	18	-0.692	-1.546	-1.034	-0.954	-0.932	-0.999
840	18	-3.574	-1.392	-1.022	-0.955	-0.952	-1.014
841	18	-1.989	-1.004	-0.987	-0.951	-0.971	-1.029
842	18	0.993	-0.574	-0.945	-0.945	-0.991	-1.043
843	18	2.606	-0.411	-0.925	-0.944	-1.013	-1.057
844	18	-1.541	-0.609	-0.935	-0.949	-1.036	-1.071
845	18	-1.314	-0.931	-0.96	-0.959	-1.06	-1.084
846	18	-2.247	-1.168	-0.984	-0.971	-1.086	-1.097
847	18	-2.255	-1.207	-0.994	-0.982	-1.112	-1.11
848	18	-1.032	-1.079	-0.991	-0.995	-1.14	-1.122
849	18	-0.273	-0.953	-0.984	-1.01	-1.168	-1.134
850	18	2.045	-1.005	-0.985	-1.032	-1.198	-1.145
851	18	-2.717	-1.255	-0.994	-1.06	-1.229	-1.156
852	18	-2.671	-1.431	-0.995	-1.092	-1.261	-1.165
853	18	-2.826	-1.364	-0.98	-1.127	-1.293	-1.175
854	18	-0.153	-1.09	-0.959	-1.167	-1.325	-1.183
855	18	0.529	-0.804	-0.954	-1.216	-1.358	-1.191
856	18	-1.181	-0.608	-0.983	-1.277	-1.391	-1.198
857	18	-1.358	-0.455	-1.053	-1.351	-1.425	-1.204
858	18	0.085	-0.348	-1.17	-1.437	-1.459	-1.209
859	18	-0.694	-0.386	-1.343	-1.535	-1.491	-1.213
860	18	0.481	-0.656	-1.568	-1.641	-1.522	-1.216
861	18	-1.249	-1.234	-1.835	-1.75	-1.55	-1.218
862	18	-0.168	-2.089	-2.116	-1.854	-1.574	-1.219
863	18	-3.139	-3.11	-2.375	-1.943	-1.592	-1.218
864	18	-5.138	-3.988	-2.563	-2.004	-1.602	-1.216
865	18	-5.697	-4.398	-2.635	-2.028	-1.603	-1.212
866	18	-7.075	-4.168	-2.572	-2.008	-1.593	-1.207
867	18	-1.916	-3.366	-2.385	-1.95	-1.574	-1.2
868	18	-0.945	-2.358	-2.117	-1.861	-1.547	-1.192
869	18	-2.217	-1.399	-1.816	-1.755	-1.513	-1.183
870	18	-0.054	-0.581	-1.52	-1.642	-1.474	-1.172
871	18	-0.91	-0.028	-1.268	-1.532	-1.432	-1.16
872	18	3.684	0.143	-1.086	-1.434	-1.388	-1.148
873	18	1.076	-0.168	-0.99	-1.353	-1.343	-1.134
874	18	-4.883	-0.685	-0.961	-1.286	-1.298	-1.12
875	18	0.144	-1.022	-0.965	-1.229	-1.252	-1.106
876	18	-2.342	-1.162	-0.987	-1.178	-1.205	-1.09
877	18	-2.616	-1.111	-1.015	-1.131	-1.157	-1.074
878	18	1.237	-1.004	-1.046	-1.088	-1.109	-1.058
879	18	1.02	-1.103	-1.086	-1.048	-1.061	-1.041
880	18	-2.273	-1.426	-1.125	-1.008	-1.013	-1.024
881	18	-2.913	-1.729	-1.138	-0.964	-0.964	-1.007
882	18	-1.7	-1.836	-1.107	-0.91	-0.915	-0.99
883	18	-2.083	-1.709	-1.027	-0.846	-0.866	-0.972
884	18	-1.998	-1.338	-0.904	-0.774	-0.817	-0.954
885	18	-1.528	-0.766	-0.75	-0.695	-0.769	-0.937
886	18	-0.462	-0.133	-0.59	-0.617	-0.723	-0.92
887	18	3.413	0.316	-0.456	-0.545	-0.681	-0.903
888	18	1.212	0.362	-0.371	-0.486	-0.643	-0.886
889	18	-2.035	0.121	-0.333	-0.439	-0.61	-0.87
890	18	0.686	-0.176	-0.325	-0.402	-0.582	-0.855
891	18	-0.045	-0.482	-0.337	-0.373	-0.558	-0.84
892	18	-2.379	-0.699	-0.355	-0.349	-0.539	-0.826
893	18	-0.19	-0.711	-0.364	-0.328	-0.523	-0.813
894	18	-0.723	-0.548	-0.362	-0.309	-0.512	-0.8
895	18	-3.701	-0.234	-0.351	-0.293	-0.506	-0.788
896	18	3.962	0.111	-0.337	-0.28	-0.504	-0.776
897	18	1.588	0.103	-0.346	-0.277	-0.507	-0.766
898	18	-0.056	-0.295	-0.373	-0.283	-0.514	-0.756
899	18	-1.419	-0.856	-0.398	-0.294	-0.526	-0.747
900	18	-2.18	-1.309	-0.395	-0.307	-0.542	-0.739
901	18	-1.443	-1.453	-0.347	-0.318	-0.56	-0.732
902	18	-3.379	-1.196	-0.253	-0.329	-0.58	-0.725
903	18	-0.927	-0.521	-0.125	-0.342	-0.603	-0.718
904	18	0.424	0.349	-0.001	-0.368	-0.63	-0.713
905	18	3.462	1.096	0.073	-0.414	-0.66	-0.708
906	18	1.302	1.461	0.057	-0.49	-0.694	-0.704
907	18	1.435	1.427	-0.063	-0.596	-0.732	-0.701
908	18	0.628	1.023	-0.286	-0.73	-0.773	-0.698
909	18	2.125	0.266	-0.597	-0.887	-0.815	-0.696
910	18	-0.408	-0.822	-0.97	-1.057	-0.856	-0.694
911	18	-1.381	-2.024	-1.357	-1.227	-0.894	-0.692
912	18	-4.852	-3.016	-1.702	-1.38	-0.925	-0.691
913	18	-7.279	-3.444	-1.955	-1.502	-0.949	-0.689
914	18	-2.266	-3.226	-2.093	-1.585	-0.961	-0.687
915	18	-1.563	-2.703	-2.135	-1.63	-0.964	-0.685
916	18	-1.234	-2.186	-2.108	-1.641	-0.956	-0.683
917	18	-1.35	-1.817	-2.033	-1.619	-0.938	-0.68
918	18	-1.779	-1.599	-1.926	-1.569	-0.911	-0.678
919	18	-1.742	-1.466	-1.793	-1.492	-0.875	-0.675
920	268	-1.283	-1.363	-1.642	-1.391	-0.832	-0.672
921	268	-1.442	-1.269	-1.477	-1.269	-0.781	-0.669
922	268	-1.348	-1.167	-1.301	-1.129	-0.724	-0.667
923	268	-0.522	-1.058	-1.115	-0.974	-0.662	-0.665
924	268	-1.36	-0.954	-0.921	-0.807	-0.597	-0.663
925	268	-0.998	-0.826	-0.716	-0.631	-0.53	-0.662
926	268	0.428	-0.678	-0.501	-0.45	-0.463	-0.662
927	268	-1.709	-0.515	-0.277	-0.269	-0.397	-0.662
928	268	-0.964	-0.259	-0.042	-0.09	-0.334	-0.663
929	268	1.367	0.05	0.196	0.081	-0.276	-0.666
930	268	0.618	0.305	0.424	0.237	-0.224	-0.669
931	268	0.661	0.524	0.634	0.374	-0.181	-0.674
932	268	-0.74	0.798	0.823	0.487	-0.147	-0.681
933	268	-0.646	1.198	0.983	0.572	-0.123	-0.689
934	268	4.77	1.59	1.097	0.624	-0.112	-0.698
935	268	1.801	1.694	1.138	0.636	-0.113	-0.709
936	268	1.91	1.514	1.101	0.607	-0.129	-0.721
937	268	0.811	1.157	0.996	0.539	-0.157	-0.736
938	268	1.187	0.766	0.835	0.436	-0.197	-0.751
939	268	-0.819	0.469	0.634	0.304	-0.249	-0.768
940	268	-1.804	0.394	0.406	0.148	-0.311	-0.786
941	268	0.976	0.492	0.153	-0.028	-0.382	-0.805
942	268	3.772	0.462	-0.139	-0.221	-0.461	-0.825
943	268	-0.627	0.083	-0.475	-0.429	-0.546	-0.846
944	268	-1.336	-0.527	-0.834	-0.642	-0.636	-0.867
945	268	0.769	-1.261	-1.192	-0.852	-0.727	-0.889
946	268	-2.48	-2.06	-1.523	-1.048	-0.819	-0.91
947	268	-4.585	-2.688	-1.791	-1.22	-0.909	-0.932
948	268	-3.372	-2.945	-1.969	-1.36	-0.995	-0.953
949	268	-3.413	-2.855	-2.051	-1.464	-1.075	-0.973
950	268	-2.066	-2.547	-2.046	-1.536	-1.149	-0.992
951	268	-1.125	-2.208	-1.976	-1.578	-1.218	-1.011
952	268	-0.674	-1.961	-1.863	-1.598	-1.28	-1.029
953	268	-3.739	-1.77	-1.722	-1.6	-1.338	-1.046
954	268	-1.389	-1.491	-1.561	-1.589	-1.39	-1.061
955	268	-1.15	-1.144	-1.4	-1.572	-1.438	-1.076
956	268	-1.27	-0.794	-1.26	-1.556	-1.483	-1.089
957	268	0.496	-0.513	-1.162	-1.548	-1.524	-1.101
958	268	-1.341	-0.399	-1.122	-1.553	-1.562	-1.112
959	268	1.843	-0.48	-1.145	-1.574	-1.598	-1.121
960	268	-1.505	-0.796	-1.232	-1.611	-1.632	-1.129
961	268	-1.683	-1.191	-1.364	-1.661	-1.662	-1.136
962	268	-2.555	-1.531	-1.521	-1.718	-1.688	-1.141
963	268	-1.12	-1.78	-1.685	-1.778	-1.71	-1.144
964	268	-2.567	-2.006	-1.845	-1.837	-1.725	-1.145
965	268	-0.975	-2.246	-1.991	-1.89	-1.735	-1.145
966	268	-1.985	-2.548	-2.112	-1.933	-1.738	-1.143
967	268	-3.527	-2.826	-2.195	-1.962	-1.732	-1.139
968	268	-3.532	-2.922	-2.223	-1.972	-1.719	-1.133
969	268	-3.257	-2.751	-2.192	-1.961	-1.697	-1.126
970	268	-3.533	-2.323	-2.11	-1.93	-1.667	-1.116
971	268	-1.512	-1.747	-1.995	-1.883	-1.629	-1.105
972	268	0.403	-1.267	-1.878	-1.825	-1.585	-1.092
973	268	0.456	-1.089	-1.782	-1.762	-1.534	-1.077
974	268	-1.614	-1.198	-1.713	-1.695	-1.479	-1.061
975	268	-3.562	-1.39	-1.659	-1.622	-1.418	-1.043
976	268	-0.144	-1.516	-1.604	-1.542	-1.352	-1.024
977	268	-2.115	-1.63	-1.546	-1.454	-1.282	-1.004
978	268	-2.188	-1.713	-1.474	-1.357	-1.207	-0.983
979	268	0.42	-1.771	-1.381	-1.25	-1.129	-0.961
980	268	-3.031	-1.818	-1.262	-1.133	-1.048	-0.938
981	268	-3.061	-1.681	-1.105	-1.006	-0.965	-0.914
982	268	-1.708	-1.294	-0.909	-0.87	-0.879	-0.89
983	268	-0.307	-0.776	-0.691	-0.731	-0.794	-0.865
984	268	1.188	-0.313	-0.475	-0.594	-0.71	-0.841
985	268	0.045	-0.014	-0.281	-0.466	-0.629	-0.816
986	268	-0.201	0.184	-0.118	-0.35	-0.551	-0.791
987	268	-0.712	0.374	0.012	-0.248	-0.478	-0.767
988	268	0.881	0.588	0.104	-0.162	-0.41	-0.743
989	268	0.467	0.739	0.149	-0.093	-0.349	-0.72
990	268	1.422	0.735	0.143	-0.042	-0.294	-0.697
991	268	2.497	0.485	0.087	-0.009	-0.246	-0.675
992	268	-0.65	0.01	-0.003	0.011	-0.204	-0.655
993	268	-1.99	-0.457	-0.097	0.025	-0.168	-0.634
994	268	-1.304	-0.739	-0.168	0.039	-0.138	-0.615
995	268	0.903	-0.851	-0.204	0.056	-0.113	-0.597
996	268	-1.737	-0.859	-0.2	0.079	-0.092	-0.579
997	268	-1.254	-0.687	-0.15	0.108	-0.077	-0.563
998	268	-1.916	-0.318	-0.057	0.142	-0.066	-0.548
999	268	1.755	0.143	0.062	0.177	-0.061	-0.533
1000	268	1.958	0.45	0.18	0.206	-0.062	-0.52
1001	268	-0.206	0.524	0.281	0.224	-0.069	-0.508
1002	268	1.753	0.464	0.362	0.23	-0.083	-0.497
1003	268	-1.532	0.367	0.422	0.221	-0.104	-0.487
1004	268	0.056	0.395	0.465	0.197	-0.132	-0.478
1005	268	0.519	0.538	0.485	0.156	-0.165	-0.47
1006	268	1.619	0.7	0.468	0.095	-0.205	-0.463
1007	268	0.572	0.799	0.404	0.012	-0.25	-0.457
1008	268	-1.034	0.842	0.288	-0.093	-0.301	-0.452
1009	268	2.583	0.788	0.119	-0.219	-0.355	-0.448
1010	268	3.016	0.44	-0.111	-0.364	-0.412	-0.444
1011	268	-1.834	-0.194	-0.39	-0.523	-0.471	-0.441
1012	268	-1.898	-0.832	-0.683	-0.685	-0.53	-0.438
1013	268	-1.279	-1.325	-0.964	-0.843	-0.586	-0.435
1014	268	-1.501	-1.677	-1.215	-0.987	-0.637	-0.433
1015	268	-1.883	-1.908	-1.424	-1.113	-0.683	-0.43
1016	268	-2.393	-2.02	-1.582	-1.215	-0.721	-0.427
1017	268	-2.654	-2.016	-1.683	-1.291	-0.751	-0.423
1018	268	-0.291	-1.955	-1.732	-1.337	-0.773	-0.42
1019	268	-1.041	-1.928	-1.736	-1.356	-0.786	-0.415
1020	268	-4.674	-1.847	-1.694	-1.347	-0.789	-0.411
1021	268	-2.663	-1.561	-1.605	-1.309	-0.783	-0.405
1022	268	2.245	-1.219	-1.485	-1.247	-0.769	-0.4
1023	268	-1.613	-1.068	-1.357	-1.167	-0.748	-0.394
1024	268	-1.536	-1.038	-1.223	-1.071	-0.72	-0.387
1025	268	-0.559	-1.039	-1.078	-0.961	-0.685	-0.38
1026	268	-1.412	-1.034	-0.923	-0.84	-0.646	-0.373
1027	268	-1.111	-0.958	-0.754	-0.71	-0.603	-0.366
1028	268	-1.353	-0.778	-0.569	-0.573	-0.556	-0.359
1029	268	-0.327	-0.5	-0.373	-0.435	-0.508	-0.352
1030	268	-0.525	-0.192	-0.175	-0.299	-0.459	-0.345
1031	268	0.649	0.075	0.013	-0.171	-0.412	-0.338
1032	268	2.035	0.214	0.18	-0.056	-0.366	-0.332
1033	268	-0.465	0.235	0.321	0.042	-0.324	-0.326
1034	268	-1.118	0.337	0.44	0.123	-0.286	-0.32
1035	268	-1.532	0.652	0.54	0.185	-0.252	-0.316
1036	268	2.223	1.089	0.608	0.225	-0.224	-0.312
1037	268	4.162	1.32	0.617	0.237	-0.202	-0.309
1038	268	1.741	1.153	0.554	0.22	-0.187	-0.307
1039	268	-0.683	0.736	0.432	0.177	-0.178	-0.305
1040	268	-0.565	0.315	0.277	0.115	-0.174	-0.305
1041	268	0.202	-0.021	0.108	0.04	-0.175	-0.305
1042	268	-0.83	-0.302	-0.063	-0.042	-0.178	-0.306
1043	268	1.892	-0.575	-0.227	-0.127	-0.185	-0.308
1044	268	-1.888	-0.868	-0.375	-0.21	-0.192	-0.311
1045	268	-2.567	-0.996	-0.488	-0.285	-0.2	-0.314
1046	268	-2.217	-0.857	-0.559	-0.349	-0.208	-0.318
1047	268	0.965	-0.571	-0.597	-0.401	-0.214	-0.322
1048	268	1.074	-0.402	-0.623	-0.444	-0.22	-0.327
1049	268	0.499	-0.453	-0.649	-0.479	-0.225	-0.333
1050	268	-1.492	-0.605	-0.671	-0.504	-0.229	-0.34
1051	268	-4.218	-0.63	-0.677	-0.517	-0.231	-0.347
1052	268	0.433	-0.455	-0.661	-0.516	-0.231	-0.354
1053	268	3.277	-0.385	-0.644	-0.506	-0.229	-0.363
1054	268	0.285	-0.627	-0.636	-0.489	-0.227	-0.372
1055	268	-3.669	-0.962	-0.62	-0.462	-0.223	-0.381
1056	268	-2.632	-1.053	-0.57	-0.422	-0.217	-0.391
1057	268	0.663	-0.859	-0.484	-0.369	-0.211	-0.402
1058	268	-2.17	-0.535	-0.374	-0.306	-0.204	-0.414
1059	268	1.087	-0.161	-0.253	-0.24	-0.198	-0.426
1060	268	1.592	0.083	-0.139	-0.174	-0.194	-0.439
1061	268	0.656	0.147	-0.044	-0.114	-0.192	-0.454
1062	268	-2.983	0.181	0.035	-0.06	-0.193	-0.468
1063	268	0.773	0.345	0.105	-0.013	-0.198	-0.484
1064	268	1.479	0.495	0.154	0.023	-0.208	-0.501
1065	268	1.048	0.474	0.173	0.045	-0.223	-0.519
1066	268	0.889	0.254	0.163	0.052	-0.243	-0.537
1067	268	0.097	-0.09	0.134	0.045	-0.269	-0.557
1068	268	-1.478	-0.4	0.103	0.028	-0.301	-0.577
1069	268	-1.167	-0.508	0.085	0.001	-0.337	-0.598
1070	268	-0.266	-0.372	0.081	-0.034	-0.379	-0.619
1071	268	-1.748	-0.041	0.084	-0.079	-0.425	-0.641
1072	268	1.583	0.382	0.077	-0.138	-0.477	-0.664
1073	268	1.364	0.655	0.034	-0.215	-0.535	-0.688
1074	268	1.685	0.631	-0.062	-0.313	-0.597	-0.711
1075	268	1.267	0.298	-0.215	-0.431	-0.665	-0.735
1076	268	-1.399	-0.206	-0.41	-0.565	-0.737	-0.76
1077	268	-2.743	-0.642	-0.626	-0.708	-0.811	-0.784
1078	268	0.268	-0.928	-0.846	-0.855	-0.886	-0.808
1079	268	-0.071	-1.199	-1.066	-1.002	-0.961	-0.832
1080	268	-2.149	-1.488	-1.28	-1.145	-1.035	-0.856
1081	268	-2.881	-1.703	-1.472	-1.28	-1.106	-0.879
1082	268	-0.58	-1.816	-1.634	-1.4	-1.173	-0.901
1083	268	-2.335	-1.91	-1.766	-1.506	-1.235	-0.922
1084	268	-2.621	-1.982	-1.865	-1.595	-1.292	-0.943
1085	268	-0.677	-2.054	-1.931	-1.666	-1.343	-0.962
1086	268	-1.265	-2.192	-1.967	-1.72	-1.387	-0.98
1087	268	-3.665	-2.312	-1.969	-1.754	-1.425	-0.997
1088	268	-4.353	-2.232	-1.928	-1.77	-1.455	-1.013
1089	268	-0.137	-1.942	-1.852	-1.768	-1.478	-1.028
1090	268	-2.118	-1.641	-1.76	-1.753	-1.494	-1.041
1091	268	-0.454	-1.406	-1.668	-1.732	-1.505	-1.053
1092	268	-1.405	-1.294	-1.587	-1.706	-1.51	-1.064
1093	268	-1.931	-1.277	-1.523	-1.679	-1.51	-1.074
1094	268	-0.172	-1.333	-1.478	-1.652	-1.506	-1.083
1095	268	-0.17	-1.477	-1.454	-1.626	-1.497	-1.09
1096	268	-4.236	-1.59	-1.443	-1.6	-1.484	-1.097
1097	268	-2.475	-1.454	-1.433	-1.572	-1.467	-1.102
1098	268	-1.304	-1.118	-1.427	-1.543	-1.446	-1.106
1099	268	0.822	-0.812	-1.441	-1.514	-1.421	-1.109
1100	268	0.17	-0.767	-1.488	-1.489	-1.395	-1.112
1101	268	-1.486	-1.028	-1.563	-1.465	-1.366	-1.113
1102	268	-1.61	-1.509	-1.646	-1.437	-1.334	-1.114
1103	268	0.714	-2.151	-1.714	-1.401	-1.299	-1.114
1104	268	-4.118	-2.844	-1.742	-1.351	-1.262	-1.114
1105	268	-4.928	-3.215	-1.688	-1.279	-1.22	-1.113
1106	268	-4.744	-2.995	-1.532	-1.183	-1.176	-1.111
1107	268	-3.401	-2.168	-1.281	-1.066	-1.128	-1.108
1108	268	-0.974	-0.979	-0.972	-0.938	-1.08	-1.106
1109	268	2.178	0.153	-0.663	-0.813	-1.034	-1.103
1110	268	3.911	0.832	-0.407	-0.705	-0.991	-1.1
1111	268	-0.147	0.952	-0.236	-0.622	-0.954	-1.098
1112	268	-0.502	0.75	-0.145	-0.567	-0.923	-1.096
1113	268	0.464	0.397	-0.125	-0.538	-0.898	-1.095
1114	268	2.825	-0.094	-0.168	-0.535	-0.879	-1.094
1115	268	-2.359	-0.659	-0.255	-0.554	-0.866	-1.093
1116	268	-3.497	-0.971	-0.354	-0.587	-0.858	-1.093
1117	268	-2.361	-0.873	-0.444	-0.63	-0.853	-1.094
1118	268	1.47	-0.551	-0.533	-0.682	-0.853	-1.095
1119	268	1.363	-0.359	-0.641	-0.745	-0.856	-1.097
1120	268	-0.546	-0.435	-0.776	-0.817	-0.863	-1.099
1121	268	-0.771	-0.688	-0.931	-0.895	-0.872	-1.102
1122	268	-1.664	-0.998	-1.092	-0.973	-0.884	-1.106
1123	268	-1.603	-1.27	-1.243	-1.046	-0.895	-1.11
1124	268	-0.625	-1.494	-1.377	-1.11	-0.907	-1.114
1125	268	-3.35	-1.683	-1.484	-1.159	-0.918	-1.119
1126	268	0.092	-1.819	-1.556	-1.193	-0.927	-1.125
1127	268	-1.967	-1.978	-1.591	-1.208	-0.935	-1.13
1128	268	-2.182	-2.085	-1.581	-1.203	-0.94	-1.137
1129	268	-2.983	-2.015	-1.52	-1.178	-0.944	-1.143
1130	268	-3.77	-1.679	-1.406	-1.133	-0.945	-1.15
1131	268	-0.146	-1.145	-1.254	-1.073	-0.945	-1.158
1132	268	1.466	-0.696	-1.093	-1.006	-0.946	-1.166
1133	268	-0.825	-0.511	-0.946	-0.939	-0.947	-1.175
1134	268	-1.041	-0.527	-0.816	-0.876	-0.951	-1.185
1135	268	0.117	-0.669	-0.703	-0.82	-0.957	-1.195
1136	268	0.594	-0.904	-0.606	-0.773	-0.966	-1.206
1137	268	-2.394	-1.092	-0.517	-0.737	-0.978	-1.217
1138	268	-4.66	-0.95	-0.421	-0.71	-0.994	-1.23
1139	268	-0.099	-0.39	-0.323	-0.695	-1.014	-1.243
1140	268	1.616	0.268	-0.255	-0.7	-1.038	-1.256
1141	268	2.357	0.669	-0.253	-0.733	-1.068	-1.271
1142	268	1.323	0.653	-0.337	-0.796	-1.104	-1.286
1143	268	-1.042	0.284	-0.503	-0.889	-1.146	-1.301
1144	268	1.457	-0.291	-0.732	-1.006	-1.192	-1.318
1145	268	-1.816	-1.003	-1.005	-1.139	-1.242	-1.334
1146	268	-2.96	-1.656	-1.289	-1.279	-1.293	-1.351
1147	268	-1.117	-2.126	-1.556	-1.417	-1.343	-1.368
1148	268	-2.906	-2.421	-1.788	-1.545	-1.393	-1.385
1149	268	-4.38	-2.489	-1.972	-1.658	-1.439	-1.402
1150	268	-1.311	-2.353	-2.102	-1.752	-1.482	-1.418
1151	268	-1.967	-2.218	-2.19	-1.827	-1.521	-1.434
1152	268	-0.16	-2.221	-2.247	-1.884	-1.556	-1.45
1153	268	-2.877	-2.395	-2.276	-1.921	-1.587	-1.465
1154	268	-2.644	-2.562	-2.268	-1.938	-1.612	-1.479
1155	268	-4.564	-2.547	-2.215	-1.932	-1.633	-1.493
1156	268	-4.124	-2.243	-2.117	-1.906	-1.649	-1.507
1157	268	1.228	-1.808	-1.992	-1.864	-1.66	-1.519
1158	268	0.318	-1.567	-1.87	-1.814	-1.669	-1.531
1159	268	-3.975	-1.53	-1.76	-1.761	-1.676	-1.543
1160	268	-1.299	-1.494	-1.656	-1.705	-1.681	-1.554
1161	268	-1.187	-1.458	-1.559	-1.65	-1.685	-1.564
1162	268	-1.14	-1.458	-1.475	-1.598	-1.689	-1.574
1163	268	-1.103	-1.486	-1.403	-1.552	-1.694	-1.583
1164	268	-2.108	-1.485	-1.341	-1.513	-1.698	-1.591
1165	268	-2.92	-1.367	-1.285	-1.482	-1.704	-1.599
1166	268	-0.622	-1.138	-1.237	-1.46	-1.712	-1.607
1167	268	-0.284	-0.969	-1.212	-1.452	-1.721	-1.613
1168	268	1.194	-0.998	-1.221	-1.46	-1.733	-1.62
1169	268	-1.821	-1.226	-1.263	-1.485	-1.747	-1.625
1170	268	-3.89	-1.418	-1.323	-1.521	-1.763	-1.63
1171	268	-2.161	-1.414	-1.389	-1.567	-1.781	-1.634
1172	268	0.892	-1.34	-1.466	-1.623	-1.799	-1.638
1173	268	-0.457	-1.41	-1.568	-1.688	-1.819	-1.641
1174	268	-3.215	-1.6	-1.689	-1.761	-1.839	-1.643
1175	268	-1.54	-1.77	-1.817	-1.837	-1.858	-1.644
1176	268	-2.167	-1.917	-1.948	-1.912	-1.876	-1.645
1177	268	-1.012	-2.063	-2.078	-1.984	-1.892	-1.644
1178	268	-2.847	-2.224	-2.201	-2.049	-1.905	-1.643
1179	268	-3.326	-2.327	-2.309	-2.104	-1.915	-1.64
1180	268	-2.046	-2.364	-2.394	-2.145	-1.92	-1.636
1181	268	-0.776	-2.438	-2.458	-2.172	-1.921	-1.632
1182	268	-3.207	-2.603	-2.499	-2.182	-1.916	-1.626
1183	268	-3.687	-2.745	-2.505	-2.175	-1.906	-1.619
1184	268	-2.522	-2.798	-2.465	-2.146	-1.89	-1.611
1185	268	-1.707	-2.799	-2.381	-2.099	-1.868	-1.602
1186	268	-3.683	-2.754	-2.254	-2.034	-1.841	-1.593
1187	268	-2.67	-2.572	-2.083	-1.954	-1.809	-1.582
1188	268	-2.259	-2.233	-1.876	-1.862	-1.773	-1.57
1189	268	-2.965	-1.752	-1.649	-1.765	-1.733	-1.558
1190	268	-0.602	-1.182	-1.423	-1.669	-1.691	-1.546
1191	268	-0.223	-0.684	-1.225	-1.582	-1.649	-1.532
1192	268	0.8	-0.382	-1.081	-1.511	-1.606	-1.519
1193	268	-0.778	-0.304	-1.003	-1.46	-1.565	-1.505
1194	268	-1.667	-0.357	-0.99	-1.43	-1.524	-1.492
1195	268	1.142	-0.5	-1.037	-1.418	-1.485	-1.478
1196	268	-1.036	-0.797	-1.139	-1.424	-1.447	-1.464
1197	268	-1.014	-1.183	-1.28	-1.441	-1.41	-1.451
1198	268	-2.15	-1.571	-1.437	-1.464	-1.372	-1.437
1199	268	-2.809	-1.876	-1.587	-1.484	-1.334	-1.423
1200	268	-0.321	-2.095	-1.715	-1.496	-1.294	-1.41
1201	268	-2.93	-2.288	-1.81	-1.495	-1.252	-1.397
1202	268	-2.902	-2.374	-1.856	-1.476	-1.207	-1.383
1203	268	-2.179	-2.307	-1.847	-1.436	-1.16	-1.37
1204	268	-2.623	-2.107	-1.782	-1.375	-1.111	-1.358
1205	268	-2.169	-1.808	-1.668	-1.292	-1.06	-1.345
1206	268	0.285	-1.506	-1.518	-1.192	-1.008	-1.334
1207	268	-2.05	-1.298	-1.345	-1.08	-0.957	-1.322
1208	268	-0.922	-1.127	-1.156	-0.957	-0.908	-1.312
1209	268	-1.052	-0.96	-0.955	-0.827	-0.86	-1.302
1210	268	-1.214	-0.766	-0.749	-0.696	-0.817	-1.293
1211	268	0.032	-0.528	-0.545	-0.566	-0.779	-1.285
1212	268	-0.68	-0.266	-0.351	-0.444	-0.747	-1.278
1213	268	-1.506	0.039	-0.175	-0.334	-0.722	-1.273
1214	268	1.876	0.334	-0.026	-0.241	-0.706	-1.268
1215	268	1.22	0.437	0.08	-0.171	-0.699	-1.265
1216	268	0.645	0.306	0.138	-0.127	-0.703	-1.263
1217	268	1.688	0.029	0.156	-0.11	-0.718	-1.262
1218	268	-3.987	-0.207	0.149	-0.117	-0.742	-1.263
1219	268	-1.831	-0.133	0.136	-0.147	-0.777	-1.265
1220	268	2.553	0.128	0.108	-0.2	-0.822	-1.267
1221	268	2.117	0.241	0.041	-0.283	-0.876	-1.271
1222	268	-0.743	0.125	-0.073	-0.394	-0.94	-1.276
1223	268	-0.468	-0.061	-0.226	-0.533	-1.013	-1.281
1224	268	-1.469	-0.213	-0.41	-0.694	-1.092	-1.287
1225	268	-1.378	-0.326	-0.623	-0.875	-1.177	-1.294
1226	268	3.669	-0.559	-0.872	-1.074	-1.266	-1.301
1227	268	-0.571	-1.107	-1.16	-1.289	-1.357	-1.307
1228	268	-4.064	-1.738	-1.465	-1.51	-1.449	-1.314
1229	268	-3.906	-2.113	-1.756	-1.727	-1.539	-1.32
1230	268	-2.651	-2.171	-2.02	-1.934	-1.624	-1.326
1231	268	-1.087	-2.106	-2.265	-2.128	-1.703	-1.33
1232	268	0.631	-2.186	-2.505	-2.307	-1.775	-1.334
1233	268	-3.683	-2.509	-2.741	-2.468	-1.838	-1.336
1234	268	-4.406	-2.885	-2.954	-2.603	-1.89	-1.337
1235	268	-1.523	-3.215	-3.128	-2.707	-1.931	-1.337
1236	268	-3.604	-3.542	-3.255	-2.775	-1.958	-1.335
1237	268	-4.634	-3.774	-3.322	-2.804	-1.971	-1.331
1238	268	-4.345	-3.806	-3.314	-2.789	-1.97	-1.326
1239	268	-4.301	-3.635	-3.229	-2.732	-1.954	-1.318
1240	268	-1.424	-3.356	-3.076	-2.634	-1.924	-1.309
1241	268	-3.352	-3.096	-2.868	-2.502	-1.881	-1.298
1242	268	-3.302	-2.805	-2.612	-2.339	-1.827	-1.285
1243	268	-2.41	-2.423	-2.314	-2.152	-1.762	-1.271
1244	268	-3.488	-1.948	-1.989	-1.946	-1.69	-1.256
1245	268	-0.518	-1.429	-1.652	-1.73	-1.611	-1.239
1246	268	1.436	-1.051	-1.329	-1.515	-1.528	-1.221
1247	268	-1.852	-0.88	-1.036	-1.307	-1.443	-1.202
1248	268	-1.754	-0.727	-0.77	-1.11	-1.359	-1.183
1249	268	-1.043	-0.462	-0.531	-0.929	-1.275	-1.163
1250	268	-0.537	-0.107	-0.327	-0.767	-1.195	-1.142
1251	268	1.173	0.222	-0.17	-0.631	-1.119	-1.122
1252	268	1.658	0.372	-0.076	-0.524	-1.049	-1.101
1253	268	-0.576	0.311	-0.046	-0.448	-0.986	-1.08
1254	268	1.293	0.142	-0.07	-0.399	-0.93	-1.059
1255	268	-1.925	-0.06	-0.135	-0.376	-0.881	-1.038
1256	268	-0.193	-0.173	-0.226	-0.373	-0.839	-1.017
1257	268	-0.517	-0.239	-0.334	-0.386	-0.803	-0.997
1258	268	0.484	-0.356	-0.454	-0.413	-0.773	-0.977
1259	268	0.841	-0.633	-0.583	-0.449	-0.749	-0.957
1260	268	-0.832	-1.058	-0.706	-0.491	-0.73	-0.937
1261	268	-3.019	-1.438	-0.801	-0.531	-0.714	-0.917
1262	268	-2.427	-1.561	-0.845	-0.563	-0.701	-0.897
1263	268	-2.072	-1.396	-0.834	-0.586	-0.69	-0.878
1264	268	-0.431	-1.059	-0.78	-0.6	-0.681	-0.859
1265	268	0.954	-0.743	-0.704	-0.611	-0.674	-0.839
1266	268	-1.073	-0.55	-0.625	-0.622	-0.67	-0.821
1267	268	-0.693	-0.402	-0.55	-0.635	-0.667	-0.802
1268	268	-0.972	-0.239	-0.49	-0.651	-0.666	-0.783
1269	268	0.178	-0.065	-0.453	-0.674	-0.667	-0.765
1270	268	0.736	0.041	-0.454	-0.706	-0.67	-0.747
1271	268	-0.056	0.022	-0.501	-0.747	-0.674	-0.73
1272	268	-0.016	-0.102	-0.591	-0.798	-0.679	-0.712
1273	268	-1.115	-0.296	-0.719	-0.853	-0.684	-0.695
1274	268	-0.391	-0.544	-0.872	-0.911	-0.688	-0.678
1275	268	0.566	-0.905	-1.041	-0.966	-0.69	-0.661
1276	268	-1.424	-1.407	-1.21	-1.013	-0.689	-0.644
1277	268	-1.521	-1.922	-1.353	-1.045	-0.684	-0.626
1278	268	-4.095	-2.274	-1.443	-1.056	-0.675	-0.609
1279	268	-2.803	-2.294	-1.46	-1.04	-0.66	-0.592
1280	268	-1.842	-2.005	-1.4	-0.995	-0.639	-0.575
1281	268	-2.722	-1.525	-1.276	-0.926	-0.613	-0.557
1282	268	0.542	-1	-1.108	-0.837	-0.582	-0.54
1283	268	1.459	-0.657	-0.922	-0.736	-0.549	-0.523
1284	268	-1.937	-0.537	-0.734	-0.627	-0.513	-0.506
1285	268	-0.559	-0.459	-0.541	-0.513	-0.476	-0.489
1286	432	-1.075	-0.334	-0.346	-0.398	-0.439	-0.473
1287	432	-0.109	-0.142	-0.156	-0.285	-0.403	-0.457
1288	432	0.804	0.063	0.021	-0.181	-0.368	-0.441
1289	432	0.853	0.226	0.173	-0.088	-0.336	-0.426
1290	432	-1.395	0.389	0.297	-0.012	-0.308	-0.412
1291	432	0.307	0.631	0.393	0.048	-0.283	-0.398
1292	432	1.475	0.854	0.449	0.086	-0.264	-0.385
1293	432	2.271	0.895	0.452	0.101	-0.249	-0.373
1294	432	1.445	0.685	0.401	0.092	-0.241	-0.362
1295	432	-0.637	0.331	0.307	0.062	-0.237	-0.351
1296	432	-0.115	0.033	0.19	0.016	-0.237	-0.342
1297	432	-2.414	-0.098	0.066	-0.041	-0.241	-0.333
1298	432	0.51	-0.046	-0.057	-0.105	-0.247	-0.324
1299	432	1.97	-0.031	-0.187	-0.174	-0.256	-0.316
1300	432	0.109	-0.22	-0.329	-0.248	-0.266	-0.309
1301	432	-0.611	-0.548	-0.471	-0.322	-0.277	-0.302
1302	432	-1.831	-0.869	-0.596	-0.39	-0.288	-0.296
1303	432	-1.361	-1.057	-0.69	-0.447	-0.297	-0.29
1304	432	-0.838	-1.098	-0.746	-0.491	-0.305	-0.285
1305	432	-1.905	-1.026	-0.766	-0.52	-0.31	-0.279
1306	432	0.229	-0.878	-0.754	-0.534	-0.313	-0.274
1307	432	-0.616	-0.75	-0.721	-0.536	-0.313	-0.27
1308	432	-0.557	-0.638	-0.672	-0.527	-0.311	-0.265
1309	432	-1.62	-0.498	-0.61	-0.507	-0.306	-0.261
1310	432	-0.87	-0.3	-0.54	-0.479	-0.3	-0.258
1311	432	1.391	-0.144	-0.471	-0.446	-0.291	-0.254
1312	432	1.387	-0.179	-0.417	-0.411	-0.281	-0.251
1313	432	-2.064	-0.367	-0.374	-0.374	-0.271	-0.248
1314	432	-1.211	-0.515	-0.327	-0.334	-0.259	-0.246
1315	432	1.215	-0.581	-0.271	-0.292	-0.247	-0.244
1316	432	-1.871	-0.593	-0.206	-0.248	-0.234	-0.243
1317	432	-1.235	-0.444	-0.128	-0.203	-0.22	-0.242
1318	432	0.091	-0.134	-0.042	-0.158	-0.207	-0.241
1319	432	0.551	0.227	0.037	-0.118	-0.195	-0.241
1320	432	-0.329	0.541	0.093	-0.087	-0.185	-0.242
1321	432	2.559	0.727	0.115	-0.067	-0.176	-0.243
1322	432	0.869	0.671	0.092	-0.06	-0.171	-0.244
1323	432	0.025	0.428	0.03	-0.065	-0.167	-0.247
1324	432	-0.358	0.115	-0.055	-0.078	-0.166	-0.25
1325	432	-0.496	-0.203	-0.148	-0.095	-0.167	-0.253
1326	432	0.793	-0.527	-0.235	-0.114	-0.169	-0.257
1327	432	-0.407	-0.865	-0.304	-0.13	-0.172	-0.261
1328	432	-2.925	-1.086	-0.337	-0.14	-0.176	-0.266
1329	432	-2.248	-1.025	-0.317	-0.14	-0.179	-0.272
1330	432	1.027	-0.725	-0.252	-0.132	-0.183	-0.277
1331	432	-1.083	-0.361	-0.159	-0.121	-0.188	-0.284
1332	432	0.344	0.025	-0.056	-0.11	-0.193	-0.29
1333	432	-0.006	0.367	0.039	-0.103	-0.201	-0.297
1334	432	1.84	0.608	0.107	-0.106	-0.211	-0.305
1335	432	0.078	0.688	0.133	-0.122	-0.224	-0.313
1336	432	0.709	0.653	0.114	-0.151	-0.239	-0.322
1337	432	0.247	0.518	0.048	-0.194	-0.257	-0.331
1338	432	1.334	0.281	-0.062	-0.248	-0.277	-0.34
1339	432	-0.081	-0.061	-0.206	-0.311	-0.299	-0.35
1340	432	-1.64	-0.406	-0.367	-0.378	-0.322	-0.36
1341	432	-0.599	-0.663	-0.527	-0.443	-0.344	-0.37
1342	432	0.193	-0.864	-0.675	-0.502	-0.366	-0.38
1343	432	-1.886	-1.04	-0.802	-0.551	-0.386	-0.391
1344	432	-1.734	-1.135	-0.895	-0.587	-0.405	-0.401
1345	432	-0.852	-1.165	-0.948	-0.608	-0.42	-0.411
1346	432	0.106	-1.226	-0.961	-0.612	-0.434	-0.421
1347	432	-0.951	-1.36	-0.935	-0.601	-0.445	-0.431
1348	432	-2.458	-1.452	-0.863	-0.574	-0.454	-0.441
1349	432	-2.639	-1.337	-0.737	-0.531	-0.46	-0.451
1350	432	0.007	-0.977	-0.567	-0.476	-0.466	-0.46
1351	432	-1.477	-0.472	-0.373	-0.415	-0.47	-0.47
1352	432	-0.339	0.123	-0.177	-0.357	-0.475	-0.479
1353	432	1.858	0.661	-0.009	-0.308	-0.482	-0.489
1354	432	1.594	0.952	0.103	-0.277	-0.491	-0.498
1355	432	1.485	0.936	0.144	-0.269	-0.505	-0.508
1356	432	0.903	0.663	0.114	-0.285	-0.522	-0.517
1357	432	-0.566	0.265	0.026	-0.322	-0.542	-0.526
1358	432	-0.84	-0.11	-0.101	-0.375	-0.565	-0.536
1359	432	0.675	-0.412	-0.251	-0.441	-0.59	-0.545
1360	432	-1.257	-0.66	-0.414	-0.516	-0.616	-0.554
1361	432	-1.73	-0.796	-0.574	-0.594	-0.643	-0.563
1362	432	-1.234	-0.818	-0.724	-0.672	-0.669	-0.571
1363	432	1.124	-0.85	-0.864	-0.748	-0.695	-0.579
1364	432	-0.659	-1.03	-0.998	-0.819	-0.719	-0.586
1365	432	-1.577	-1.293	-1.114	-0.883	-0.741	-0.593
1366	432	-2.338	-1.491	-1.201	-0.933	-0.76	-0.599
1367	432	-2.65	-1.52	-1.246	-0.968	-0.775	-0.605
1368	432	-1.059	-1.397	-1.251	-0.987	-0.786	-0.609
1369	432	0.418	-1.274	-1.227	-0.99	-0.794	-0.613
1370	432	-1.624	-1.249	-1.183	-0.982	-0.798	-0.617
1371	432	-1.54	-1.249	-1.118	-0.961	-0.799	-0.62
1372	432	-0.977	-1.2	-1.032	-0.93	-0.797	-0.622
1373	432	-1.706	-1.065	-0.929	-0.891	-0.792	-0.623
1374	432	-1.905	-0.806	-0.814	-0.845	-0.784	-0.624
1375	432	0.319	-0.477	-0.697	-0.797	-0.775	-0.624
1376	432	0.653	-0.238	-0.599	-0.753	-0.764	-0.623
1377	432	-0.205	-0.176	-0.529	-0.715	-0.753	-0.623
1378	432	0.229	-0.262	-0.489	-0.686	-0.743	-0.621
1379	432	-0.524	-0.437	-0.476	-0.665	-0.732	-0.62
1380	432	-1.062	-0.593	-0.48	-0.652	-0.722	-0.617
1381	432	-1.545	-0.63	-0.492	-0.643	-0.711	-0.615
1382	432	-1.11	-0.522	-0.508	-0.639	-0.701	-0.612
1383	432	0.507	-0.368	-0.534	-0.639	-0.691	-0.609
1384	432	1.114	-0.327	-0.578	-0.646	-0.681	-0.605
1385	432	-0.982	-0.446	-0.642	-0.657	-0.671	-0.602
1386	432	-1.524	-0.612	-0.713	-0.669	-0.661	-0.598
1387	432	-0.231	-0.756	-0.782	-0.68	-0.65	-0.593
1388	432	-1.07	-0.902	-0.842	-0.687	-0.639	-0.589
1389	432	-0.888	-1.048	-0.885	-0.687	-0.627	-0.584
1390	432	-0.905	-1.193	-0.905	-0.679	-0.613	-0.579
1391	432	-1.149	-1.316	-0.895	-0.661	-0.598	-0.574
1392	432	-1.413	-1.355	-0.848	-0.633	-0.582	-0.568
1393	432	-2.333	-1.229	-0.761	-0.593	-0.564	-0.563
1394	432	-2.145	-0.883	-0.637	-0.543	-0.546	-0.557
1395	432	0.777	-0.413	-0.491	-0.49	-0.527	-0.552
1396	432	1.198	-0.045	-0.352	-0.438	-0.509	-0.546
1397	432	0.208	0.12	-0.236	-0.393	-0.492	-0.541
1398	432	-0.25	0.143	-0.151	-0.358	-0.478	-0.536
1399	432	0.188	0.115	-0.096	-0.335	-0.465	-0.531
1400	432	-0.448	0.091	-0.071	-0.323	-0.455	-0.527
1401	432	-0.397	0.11	-0.075	-0.322	-0.448	-0.522
1402	432	0.941	0.143	-0.109	-0.334	-0.442	-0.519
1403	432	-0.318	0.115	-0.176	-0.357	-0.439	-0.515
1404	432	0.228	0.012	-0.271	-0.39	-0.438	-0.512
1405	432	0.88	-0.203	-0.389	-0.429	-0.439	-0.51
1406	432	-1.208	-0.525	-0.52	-0.472	-0.44	-0.507
1407	432	-0.789	-0.848	-0.646	-0.514	-0.441	-0.506
1408	432	-1.568	-1.11	-0.751	-0.548	-0.442	-0.504
1409	432	-1.169	-1.271	-0.821	-0.572	-0.442	-0.503
1410	432	-0.736	-1.333	-0.852	-0.582	-0.44	-0.502
1411	432	-2.404	-1.286	-0.84	-0.579	-0.436	-0.501
1412	432	-1.487	-1.084	-0.785	-0.562	-0.43	-0.501
1413	432	-0.072	-0.791	-0.697	-0.533	-0.424	-0.501
1414	432	0.004	-0.525	-0.594	-0.497	-0.416	-0.501
1415	432	-0.525	-0.325	-0.486	-0.456	-0.408	-0.502
1416	432	-0.335	-0.161	-0.384	-0.415	-0.401	-0.504
1417	432	-0.491	-0.016	-0.293	-0.376	-0.394	-0.506
1418	432	0.605	0.093	-0.222	-0.342	-0.389	-0.508
1419	432	0.703	0.106	-0.176	-0.315	-0.385	-0.512
1420	432	-0.699	0.021	-0.157	-0.297	-0.384	-0.516
1421	432	0.769	-0.108	-0.16	-0.287	-0.384	-0.52
1422	432	-0.673	-0.263	-0.178	-0.284	-0.387	-0.525
1423	432	-0.633	-0.363	-0.203	-0.288	-0.392	-0.531
1424	432	-1.296	-0.357	-0.228	-0.296	-0.398	-0.538
1425	432	-0.549	-0.255	-0.251	-0.309	-0.407	-0.545
1426	432	1.213	-0.18	-0.279	-0.326	-0.417	-0.553
1427	432	1.167	-0.271	-0.32	-0.35	-0.429	-0.561
1428	432	-1.342	-0.497	-0.369	-0.379	-0.443	-0.57
1429	432	-1.638	-0.66	-0.412	-0.41	-0.458	-0.579
1430	432	-1.957	-0.639	-0.442	-0.44	-0.474	-0.589
1431	432	0.574	-0.471	-0.46	-0.47	-0.491	-0.6
1432	432	0.069	-0.328	-0.482	-0.502	-0.509	-0.611
1433	432	0.157	-0.297	-0.514	-0.537	-0.528	-0.622
1434	432	-0.044	-0.384	-0.561	-0.574	-0.547	-0.634
1435	432	-1.075	-0.53	-0.617	-0.612	-0.567	-0.647
1436	432	-1.323	-0.643	-0.675	-0.65	-0.587	-0.659
1437	432	-0.626	-0.697	-0.731	-0.685	-0.607	-0.672
1438	432	-0.225	-0.747	-0.785	-0.717	-0.626	-0.685
1439	432	-0.422	-0.846	-0.837	-0.746	-0.645	-0.699
1440	432	-1.379	-0.98	-0.882	-0.77	-0.663	-0.712
1441	432	-1.149	-1.088	-0.912	-0.787	-0.68	-0.726
1442	432	-1.167	-1.139	-0.924	-0.797	-0.696	-0.74
1443	432	-1.333	-1.122	-0.915	-0.799	-0.711	-0.753
1444	432	-1.426	-1.035	-0.886	-0.794	-0.725	-0.767
1445	432	-0.329	-0.906	-0.842	-0.784	-0.738	-0.781
1446	432	-0.664	-0.799	-0.791	-0.771	-0.751	-0.795
1447	432	-0.514	-0.721	-0.738	-0.757	-0.764	-0.809
1448	432	-1.154	-0.646	-0.688	-0.744	-0.777	-0.823
1449	432	-1.426	-0.537	-0.642	-0.733	-0.791	-0.836
1450	432	0.708	-0.424	-0.608	-0.727	-0.807	-0.85
1451	432	0.653	-0.418	-0.594	-0.729	-0.823	-0.864
1452	432	-1.759	-0.503	-0.603	-0.738	-0.842	-0.877
1453	432	-0.919	-0.559	-0.627	-0.753	-0.862	-0.891
1454	432	-0.077	-0.576	-0.665	-0.775	-0.883	-0.904
1455	432	-0.99	-0.601	-0.717	-0.804	-0.906	-0.917
1456	432	-0.522	-0.648	-0.782	-0.837	-0.93	-0.93
1457	432	0.042	-0.757	-0.859	-0.876	-0.956	-0.942
1458	432	-1.251	-0.943	-0.944	-0.917	-0.982	-0.954
1459	432	-1.286	-1.143	-1.028	-0.959	-1.009	-0.966
1460	432	-1.161	-1.309	-1.102	-0.999	-1.036	-0.977
1461	432	-1.624	-1.411	-1.158	-1.035	-1.062	-0.987
1462	432	-1.985	-1.414	-1.194	-1.065	-1.088	-0.997
1463	432	-1.382	-1.315	-1.207	-1.09	-1.113	-1.006
1464	432	-1.173	-1.179	-1.204	-1.11	-1.137	-1.015
1465	432	-0.674	-1.093	-1.192	-1.128	-1.16	-1.022
1466	432	0.258	-1.131	-1.18	-1.146	-1.182	-1.029
1467	432	-1.633	-1.291	-1.168	-1.163	-1.204	-1.036
1468	432	-2.257	-1.423	-1.149	-1.18	-1.224	-1.041
1469	432	-2.172	-1.398	-1.117	-1.196	-1.244	-1.045
1470	432	-1.057	-1.203	-1.077	-1.212	-1.261	-1.049
1471	432	-1.204	-0.923	-1.042	-1.231	-1.278	-1.051
1472	432	-0.254	-0.655	-1.026	-1.257	-1.293	-1.053
1473	432	-0.066	-0.511	-1.044	-1.293	-1.308	-1.053
1474	432	-0.059	-0.558	-1.104	-1.338	-1.321	-1.053
1475	432	-0.752	-0.793	-1.205	-1.392	-1.333	-1.052
1476	432	-0.712	-1.149	-1.337	-1.452	-1.343	-1.049
1477	432	-2.301	-1.529	-1.484	-1.511	-1.35	-1.046
1478	432	-2.309	-1.81	-1.627	-1.565	-1.353	-1.041
1479	432	-2.323	-1.953	-1.752	-1.609	-1.35	-1.036
1480	432	-1.914	-1.998	-1.851	-1.639	-1.343	-1.029
1481	432	-1.123	-2.035	-1.922	-1.652	-1.329	-1.021
1482	432	-1.917	-2.131	-1.964	-1.648	-1.31	-1.011
1483	432	-2.479	-2.251	-1.967	-1.623	-1.284	-1.001
1484	432	-2.072	-2.321	-1.926	-1.576	-1.252	-0.989
1485	432	-3.455	-2.276	-1.834	-1.506	-1.214	-0.977
1486	432	-1.594	-2.063	-1.691	-1.415	-1.171	-0.963
1487	432	-1.865	-1.735	-1.508	-1.305	-1.123	-0.949
1488	432	-0.854	-1.327	-1.297	-1.183	-1.071	-0.934
1489	432	-2.981	-0.865	-1.073	-1.052	-1.017	-0.918
1490	432	0.346	-0.384	-0.851	-0.92	-0.962	-0.901
1491	432	2.734	-0.106	-0.656	-0.794	-0.908	-0.885
1492	432	-0.263	-0.162	-0.503	-0.679	-0.855	-0.868
1493	432	-1.335	-0.368	-0.382	-0.576	-0.805	-0.851
1494	432	-0.963	-0.503	-0.277	-0.485	-0.758	-0.834
1495	432	-1.149	-0.461	-0.181	-0.404	-0.714	-0.817
1496	432	-1.305	-0.228	-0.093	-0.337	-0.673	-0.801
1497	432	1.363	0.1	-0.021	-0.285	-0.637	-0.784
1498	432	0.541	0.331	0.019	-0.252	-0.606	-0.768
1499	432	1.08	0.381	0.018	-0.239	-0.581	-0.752
1500	432	0.553	0.236	-0.024	-0.246	-0.561	-0.737
1501	432	0.015	-0.027	-0.098	-0.271	-0.545	-0.723
1502	432	-1.285	-0.283	-0.192	-0.309	-0.534	-0.709
1503	432	-1.227	-0.418	-0.291	-0.356	-0.527	-0.695
1504	432	-0.006	-0.442	-0.391	-0.409	-0.522	-0.682
1505	432	0.078	-0.465	-0.493	-0.466	-0.519	-0.669
1506	432	-0.014	-0.557	-0.597	-0.525	-0.518	-0.657
1507	432	-1.409	-0.709	-0.699	-0.583	-0.518	-0.646
1508	432	-0.845	-0.856	-0.79	-0.636	-0.519	-0.635
1509	432	-0.855	-0.994	-0.865	-0.681	-0.518	-0.624
1510	432	-0.475	-1.131	-0.92	-0.717	-0.516	-0.614
1511	432	-1.19	-1.245	-0.951	-0.741	-0.513	-0.604
1512	432	-2.852	-1.239	-0.952	-0.751	-0.507	-0.595
1513	432	-1.812	-1.035	-0.919	-0.747	-0.499	-0.586
1514	432	0.897	-0.743	-0.865	-0.73	-0.489	-0.577
1515	432	-0.253	-0.551	-0.807	-0.706	-0.477	-0.569
1516	432	-0.492	-0.49	-0.751	-0.674	-0.463	-0.562
1517	432	-0.986	-0.517	-0.697	-0.637	-0.448	-0.555
1518	432	-0.446	-0.596	-0.642	-0.595	-0.432	-0.549
1519	432	0.854	-0.733	-0.586	-0.549	-0.416	-0.543
1520	432	-2.201	-0.891	-0.523	-0.498	-0.398	-0.538
1521	432	-1.026	-0.897	-0.444	-0.443	-0.38	-0.534
1522	432	-2.045	-0.678	-0.344	-0.383	-0.362	-0.53
1523	432	-0.705	-0.241	-0.233	-0.323	-0.345	-0.527
1524	432	1.833	0.247	-0.13	-0.266	-0.329	-0.525
1525	432	0.132	0.577	-0.057	-0.219	-0.316	-0.524
1526	432	1.098	0.681	-0.027	-0.184	-0.306	-0.524
1527	432	2.482	0.497	-0.042	-0.163	-0.3	-0.525
1528	432	0.082	0.048	-0.095	-0.154	-0.297	-0.526
1529	432	-3.006	-0.427	-0.16	-0.153	-0.298	-0.529
1530	432	-0.179	-0.701	-0.212	-0.154	-0.302	-0.532
1531	432	-0.686	-0.801	-0.241	-0.155	-0.308	-0.536
1532	432	-0.905	-0.76	-0.243	-0.155	-0.316	-0.541
1533	432	-0.669	-0.594	-0.221	-0.156	-0.328	-0.547
1534	432	-1.293	-0.33	-0.179	-0.157	-0.342	-0.553
1535	432	1.243	-0.033	-0.13	-0.163	-0.36	-0.56
1536	432	0.517	0.164	-0.093	-0.177	-0.381	-0.568
1537	432	-0.056	0.244	-0.076	-0.201	-0.406	-0.577
1538	432	-0.368	0.254	-0.084	-0.237	-0.435	-0.586
1539	432	0.589	0.199	-0.119	-0.285	-0.467	-0.596
1540	432	1.078	0.026	-0.184	-0.345	-0.503	-0.606
1541	432	0.251	-0.269	-0.278	-0.416	-0.541	-0.616
1542	432	-2.349	-0.556	-0.387	-0.496	-0.582	-0.627
1543	432	-0.94	-0.671	-0.496	-0.578	-0.624	-0.639
1544	432	-1.465	-0.628	-0.603	-0.663	-0.666	-0.65
1545	432	0.269	-0.539	-0.712	-0.749	-0.708	-0.661
1546	432	1.131	-0.588	-0.834	-0.837	-0.75	-0.672
1547	432	-0.625	-0.854	-0.969	-0.924	-0.791	-0.683
1548	432	-2.264	-1.209	-1.104	-1.007	-0.83	-0.694
1549	432	-1.32	-1.484	-1.223	-1.081	-0.866	-0.705
1550	432	-2.694	-1.609	-1.315	-1.143	-0.898	-0.715
1551	432	-1.829	-1.554	-1.375	-1.189	-0.926	-0.724
1552	432	-1.051	-1.404	-1.408	-1.221	-0.949	-0.733
1553	432	-0.72	-1.29	-1.424	-1.239	-0.967	-0.741
1554	432	-0.661	-1.301	-1.429	-1.245	-0.982	-0.748
1555	432	-0.334	-1.44	-1.424	-1.239	-0.992	-0.755
1556	432	-3.844	-1.6	-1.4	-1.22	-0.997	-0.761
1557	432	-1.357	-1.599	-1.347	-1.187	-0.998	-0.766
1558	432	-1.694	-1.457	-1.265	-1.141	-0.995	-0.771
1559	432	-1.233	-1.23	-1.161	-1.085	-0.988	-0.774
1560	432	-0.668	-0.994	-1.047	-1.024	-0.978	-0.777
1561	432	-0.608	-0.82	-0.931	-0.96	-0.967	-0.78
1562	432	-0.122	-0.745	-0.821	-0.898	-0.954	-0.781
1563	432	-0.405	-0.754	-0.721	-0.84	-0.94	-0.782
1564	432	-1.496	-0.757	-0.629	-0.787	-0.927	-0.782
1565	432	-2.508	-0.627	-0.541	-0.741	-0.913	-0.782
1566	432	0.209	-0.356	-0.462	-0.703	-0.9	-0.781
1567	432	1.651	-0.135	-0.408	-0.678	-0.889	-0.78
1568	432	-0.032	-0.1	-0.394	-0.668	-0.879	-0.778
1569	432	-0.984	-0.183	-0.418	-0.675	-0.872	-0.776
1570	432	0.165	-0.284	-0.472	-0.694	-0.866	-0.773
1571	432	-1.245	-0.375	-0.553	-0.725	-0.862	-0.77
1572	432	-1.004	-0.422	-0.652	-0.765	-0.858	-0.766
1573	432	0.339	-0.485	-0.769	-0.81	-0.855	-0.762
1574	432	-0.097	-0.688	-0.901	-0.86	-0.853	-0.757
1575	432	0.045	-1.067	-1.039	-0.909	-0.849	-0.752
1576	432	-2.24	-1.546	-1.166	-0.953	-0.845	-0.746
1577	432	-1.995	-1.938	-1.258	-0.985	-0.838	-0.739
1578	432	-3.313	-2.1	-1.296	-0.999	-0.828	-0.732
1579	432	-2.823	-1.944	-1.272	-0.994	-0.814	-0.725
1580	432	-0.981	-1.532	-1.195	-0.97	-0.797	-0.716
1581	432	-0.632	-1.037	-1.087	-0.933	-0.778	-0.707
1582	432	-0.917	-0.582	-0.969	-0.886	-0.756	-0.698
1583	432	0.718	-0.249	-0.86	-0.836	-0.734	-0.688
1584	432	-0.445	-0.112	-0.775	-0.785	-0.71	-0.678
1585	432	0.48	-0.169	-0.718	-0.735	-0.687	-0.667
1586	432	0.28	-0.405	-0.687	-0.688	-0.663	-0.656
1587	432	-1.644	-0.73	-0.669	-0.642	-0.64	-0.645
1588	432	-1.384	-0.992	-0.646	-0.593	-0.616	-0.634
1589	432	-0.603	-1.124	-0.603	-0.542	-0.593	-0.623
1590	432	-1.705	-1.11	-0.535	-0.487	-0.569	-0.611
1591	432	-2.074	-0.906	-0.437	-0.43	-0.546	-0.599
1592	432	-0.022	-0.546	-0.317	-0.373	-0.524	-0.588
1593	432	0.864	-0.188	-0.192	-0.32	-0.504	-0.576
1594	432	0.362	0.061	-0.081	-0.278	-0.486	-0.565
1595	432	-0.735	0.227	0.006	-0.249	-0.471	-0.553
1596	432	0.689	0.367	0.064	-0.235	-0.459	-0.542
1597	432	0.822	0.456	0.083	-0.238	-0.45	-0.532
1598	432	-0.486	0.488	0.058	-0.258	-0.445	-0.521
1599	432	1.041	0.474	-0.012	-0.295	-0.443	-0.511
1600	432	0.223	0.352	-0.127	-0.348	-0.443	-0.501
1601	432	0.725	0.09	-0.282	-0.413	-0.446	-0.491
1602	432	0.067	-0.329	-0.466	-0.486	-0.45	-0.481
1603	432	-0.415	-0.846	-0.659	-0.559	-0.453	-0.472
1604	432	-1.951	-1.335	-0.837	-0.626	-0.456	-0.463
1605	432	-3.078	-1.629	-0.975	-0.678	-0.456	-0.453
1606	432	-1.735	-1.654	-1.057	-0.712	-0.452	-0.444
1607	432	-0.44	-1.502	-1.085	-0.724	-0.445	-0.434
1608	432	-1.415	-1.286	-1.067	-0.716	-0.435	-0.425
1609	432	-2.129	-1.013	-1.009	-0.689	-0.42	-0.416
1610	432	-0.265	-0.704	-0.92	-0.645	-0.403	-0.406
1611	432	0.858	-0.488	-0.816	-0.588	-0.383	-0.397
1612	432	-0.755	-0.445	-0.706	-0.521	-0.361	-0.388
1613	432	-0.552	-0.508	-0.59	-0.446	-0.337	-0.379
1614	432	-0.599	-0.612	-0.463	-0.365	-0.313	-0.371
1615	432	-0.286	-0.7	-0.322	-0.28	-0.288	-0.362
1616	432	-0.885	-0.709	-0.163	-0.192	-0.264	-0.354
1617	432	-1.599	-0.532	0.015	-0.104	-0.24	-0.347
1618	432	-1.171	-0.103	0.208	-0.02	-0.217	-0.34
1619	432	0.63	0.506	0.395	0.054	-0.198	-0.333
1620	432	1.836	1.085	0.547	0.109	-0.182	-0.327
1621	432	2.788	1.429	0.634	0.139	-0.171	-0.322
1622	432	2.216	1.45	0.639	0.139	-0.166	-0.317
1623	432	0.067	1.239	0.566	0.111	-0.166	-0.314
1624	432	-0.651	0.973	0.427	0.058	-0.171	-0.31
1625	432	2.119	0.685	0.237	-0.015	-0.181	-0.308
1626	432	1.584	0.246	0.001	-0.104	-0.193	-0.306
1627	432	-1.356	-0.334	-0.258	-0.202	-0.208	-0.305
1628	432	-1.051	-0.891	-0.51	-0.298	-0.224	-0.304
1629	432	-1.224	-1.341	-0.727	-0.384	-0.239	-0.303
1630	432	-2.07	-1.635	-0.888	-0.452	-0.252	-0.302
1631	432	-1.858	-1.733	-0.978	-0.498	-0.262	-0.302
1632	432	-2.329	-1.637	-0.994	-0.52	-0.269	-0.302
1633	432	-0.637	-1.391	-0.941	-0.516	-0.273	-0.302
1634	432	-0.955	-1.095	-0.832	-0.492	-0.274	-0.302
1635	432	-1.119	-0.787	-0.683	-0.45	-0.272	-0.302
1636	432	0.027	-0.476	-0.51	-0.396	-0.269	-0.302
1637	432	0.117	-0.193	-0.331	-0.336	-0.265	-0.302
1638	432	-0.761	0.087	-0.161	-0.274	-0.261	-0.302
1639	432	-0.05	0.41	-0.013	-0.216	-0.258	-0.303
1640	432	0.737	0.729	0.1	-0.167	-0.257	-0.304
1641	432	1.32	0.93	0.161	-0.131	-0.258	-0.305
1642	432	2.007	0.896	0.161	-0.112	-0.263	-0.307
1643	432	0.92	0.581	0.102	-0.11	-0.27	-0.309
1644	432	0.662	0.071	0.002	-0.122	-0.28	-0.311
1645	432	-1.912	-0.466	-0.112	-0.143	-0.293	-0.313
1646	432	-1.629	-0.831	-0.212	-0.165	-0.306	-0.316
1647	432	-0.172	-0.979	-0.28	-0.187	-0.321	-0.318
1648	432	-1.413	-0.966	-0.312	-0.205	-0.336	-0.321
1649	432	-1.038	-0.797	-0.307	-0.22	-0.351	-0.323
1650	432	-1.077	-0.506	-0.272	-0.234	-0.367	-0.326
1651	432	0.836	-0.182	-0.222	-0.248	-0.384	-0.328
1652	432	0.37	0.05	-0.176	-0.268	-0.402	-0.331
1653	432	0.155	0.162	-0.147	-0.296	-0.42	-0.333
1654	432	-0.001	0.186	-0.142	-0.333	-0.44	-0.335
1655	432	-0.237	0.159	-0.166	-0.38	-0.46	-0.337
1656	432	0.969	0.084	-0.222	-0.438	-0.481	-0.339
1657	432	-0.429	-0.055	-0.311	-0.504	-0.502	-0.341
1658	432	-0.993	-0.205	-0.426	-0.577	-0.522	-0.342
1659	432	0.3	-0.348	-0.562	-0.653	-0.54	-0.344
1660	432	-0.218	-0.54	-0.714	-0.729	-0.556	-0.344
1661	432	-1.441	-0.785	-0.873	-0.802	-0.569	-0.345
1662	432	-0.644	-1.05	-1.025	-0.866	-0.578	-0.345
1663	432	-0.38	-1.353	-1.161	-0.917	-0.582	-0.344
1664	432	-2.203	-1.661	-1.265	-0.951	-0.58	-0.343
1665	432	-2.894	-1.846	-1.321	-0.962	-0.572	-0.341
1666	432	-1.52	-1.834	-1.318	-0.948	-0.558	-0.338
1667	432	-1.847	-1.67	-1.257	-0.908	-0.537	-0.335
1668	432	-1.956	-1.394	-1.145	-0.845	-0.51	-0.331
1669	432	0.279	-1.076	-0.994	-0.763	-0.478	-0.327
1670	432	-0.973	-0.808	-0.82	-0.666	-0.441	-0.323
1671	432	-0.732	-0.565	-0.631	-0.558	-0.402	-0.318
1672	432	-0.817	-0.305	-0.437	-0.443	-0.36	-0.313
1673	432	0.302	-0.023	-0.248	-0.327	-0.317	-0.308
1674	432	-0.279	0.238	-0.074	-0.214	-0.274	-0.303
1675	432	0.95	0.443	0.074	-0.108	-0.233	-0.298
1676	432	1.241	0.522	0.189	-0.013	-0.194	-0.293
1677	432	0.037	0.466	0.269	0.067	-0.158	-0.289
1678	432	0.637	0.341	0.323	0.135	-0.126	-0.285
1679	432	0.141	0.195	0.356	0.189	-0.098	-0.281
1680	432	-0.006	0.094	0.378	0.23	-0.075	-0.278
1681	432	-0.567	0.105	0.397	0.261	-0.056	-0.275
1682	432	-0.732	0.263	0.415	0.28	-0.041	-0.273
1683	432	1.392	0.509	0.427	0.287	-0.032	-0.271
1684	432	1.399	0.682	0.419	0.281	-0.028	-0.27
1685	432	0.335	0.707	0.385	0.258	-0.03	-0.269
1686	432	0.802	0.597	0.324	0.222	-0.037	-0.269
1687	432	1.416	0.351	0.239	0.174	-0.048	-0.27
1688	432	-0.06	0.005	0.139	0.115	-0.064	-0.271
1689	432	-1.808	-0.288	0.039	0.052	-0.083	-0.273
1690	432	-0.029	-0.396	-0.049	-0.013	-0.105	-0.275
1691	432	-0.809	-0.335	-0.122	-0.077	-0.129	-0.277
1692	432	-0.665	-0.137	-0.184	-0.139	-0.154	-0.28
1693	432	-0.884	0.115	-0.243	-0.201	-0.181	-0.283
1694	432	2.428	0.244	-0.313	-0.263	-0.208	-0.286
1695	432	2.187	0.011	-0.407	-0.327	-0.236	-0.289
1696	432	-0.254	-0.563	-0.518	-0.39	-0.264	-0.293
1697	432	-2.751	-1.168	-0.618	-0.446	-0.291	-0.296
1698	432	-3.876	-1.447	-0.675	-0.489	-0.316	-0.3
1699	432	-2.259	-1.26	-0.677	-0.515	-0.337	-0.303
1700	432	0.521	-0.789	-0.637	-0.527	-0.355	-0.306
1701	432	0.889	-0.348	-0.585	-0.532	-0.372	-0.309
1702	432	-0.03	-0.108	-0.539	-0.533	-0.386	-0.312
1703	432	0.571	-0.077	-0.509	-0.533	-0.398	-0.315
1704	432	-0.9	-0.204	-0.495	-0.533	-0.409	-0.318
1705	432	-0.334	-0.389	-0.49	-0.532	-0.418	-0.32
1706	432	-0.666	-0.583	-0.489	-0.53	-0.424	-0.322
1707	432	0.103	-0.754	-0.486	-0.525	-0.429	-0.324
1708	432	-2.317	-0.856	-0.475	-0.518	-0.432	-0.326
1709	432	-0.669	-0.789	-0.449	-0.507	-0.432	-0.328
1710	432	-0.727	-0.586	-0.413	-0.493	-0.431	-0.329
1711	432	-0.071	-0.304	-0.377	-0.479	-0.428	-0.33
1712	432	-0.495	-0.007	-0.353	-0.466	-0.423	-0.331
1713	432	0.234	0.247	-0.351	-0.457	-0.418	-0.331
1714	432	0.606	0.358	-0.38	-0.453	-0.413	-0.332
1715	432	1.491	0.217	-0.447	-0.455	-0.407	-0.332
1716	432	1.155	-0.227	-0.544	-0.46	-0.401	-0.332
1717	432	-1.369	-0.85	-0.65	-0.464	-0.394	-0.332
1718	432	-3.967	-1.363	-0.728	-0.458	-0.385	-0.331
1719	432	-1.384	-1.566	-0.75	-0.437	-0.374	-0.33
1720	432	-0.023	-1.536	-0.71	-0.399	-0.361	-0.329
1721	432	-2.842	-1.36	-0.612	-0.348	-0.347	-0.328
1722	432	-1.201	-1.001	-0.459	-0.284	-0.331	-0.326
1723	432	0.946	-0.544	-0.268	-0.212	-0.315	-0.324
1724	432	-0.775	-0.092	-0.064	-0.141	-0.299	-0.323
1725	432	-0.285	0.383	0.135	-0.076	-0.286	-0.321
1726	432	0.808	0.859	0.307	-0.023	-0.276	-0.319
1727	432	1.82	1.227	0.427	0.011	-0.269	-0.317
1728	432	1.669	1.368	0.474	0.019	-0.267	-0.315
1729	432	2.678	1.234	0.44	0.002	-0.27	-0.314
1730	432	0.121	0.859	0.331	-0.041	-0.278	-0.313
1731	432	-1.087	0.418	0.167	-0.103	-0.289	-0.311
1732	432	0.78	0.005	-0.029	-0.179	-0.303	-0.31
1733	432	0.615	-0.439	-0.244	-0.262	-0.319	-0.309
1734	432	-1.04	-0.906	-0.458	-0.348	-0.335	-0.308
1735	432	-1.446	-1.26	-0.646	-0.426	-0.351	-0.306
1736	432	-4.044	-1.357	-0.786	-0.492	-0.364	-0.304
1737	432	-1.234	-1.146	-0.87	-0.54	-0.375	-0.302
1738	432	1.053	-0.863	-0.91	-0.572	-0.384	-0.3
1739	432	-0.261	-0.772	-0.923	-0.59	-0.389	-0.297
1740	432	0.532	-0.927	-0.915	-0.595	-0.392	-0.294
1741	432	-1.404	-1.241	-0.879	-0.585	-0.392	-0.29
1742	432	-2.487	-1.468	-0.8	-0.56	-0.388	-0.287
1743	432	-3.496	-1.366	-0.668	-0.517	-0.381	-0.283
1744	432	-1.801	-0.859	-0.488	-0.46	-0.371	-0.278
1745	432	1.118	-0.143	-0.287	-0.396	-0.358	-0.274
1746	432	1.608	0.466	-0.106	-0.336	-0.346	-0.269
1747	432	1.786	0.787	0.027	-0.287	-0.333	-0.264
1748	432	0.691	0.817	0.098	-0.254	-0.322	-0.259
1749	432	-0.328	0.684	0.11	-0.237	-0.312	-0.255
1750	432	0.863	0.501	0.07	-0.235	-0.303	-0.25
1751	432	0.291	0.284	-0.014	-0.246	-0.295	-0.245
1752	432	-0.458	0.057	-0.13	-0.266	-0.287	-0.241
1753	432	-0.681	-0.156	-0.263	-0.292	-0.28	-0.236
1754	432	0.639	-0.398	-0.4	-0.32	-0.272	-0.231
1755	432	0.162	-0.755	-0.529	-0.344	-0.263	-0.227
1756	432	-0.984	-1.194	-0.634	-0.361	-0.252	-0.222
1757	432	-2.657	-1.554	-0.689	-0.364	-0.239	-0.218
1758	432	-2.267	-1.658	-0.675	-0.349	-0.223	-0.213
1759	432	-1.563	-1.452	-0.588	-0.315	-0.204	-0.208
1760	432	-2.012	-0.979	-0.44	-0.265	-0.183	-0.204
1761	432	0.312	-0.335	-0.253	-0.205	-0.161	-0.199
1762	432	1.192	0.292	-0.062	-0.142	-0.138	-0.195
1763	432	0.617	0.775	0.103	-0.084	-0.116	-0.191
1764	432	1.264	1.096	0.221	-0.036	-0.096	-0.187
1765	432	0.655	1.246	0.28	-0.003	-0.078	-0.184
1766	432	1.797	1.214	0.272	0.015	-0.063	-0.181
1767	432	1.586	0.95	0.201	0.016	-0.051	-0.179
1768	432	0.574	0.463	0.078	0.006	-0.042	-0.177
1769	432	-0.172	-0.153	-0.069	-0.011	-0.035	-0.176
1770	432	-0.831	-0.777	-0.208	-0.027	-0.029	-0.175
1771	432	-1.095	-1.287	-0.31	-0.035	-0.023	-0.175
1772	432	-2.2	-1.564	-0.349	-0.03	-0.017	-0.175
1773	432	-2.94	-1.485	-0.308	-0.008	-0.011	-0.175
1774	432	-1.473	-1.027	-0.19	0.029	-0.005	-0.176
1775	432	0.983	-0.347	-0.018	0.076	0.001	-0.177
1776	432	-0.346	0.352	0.173	0.124	0.006	-0.179
1777	432	1.199	0.97	0.352	0.165	0.007	-0.181
1778	432	2.528	1.381	0.488	0.192	0.005	-0.184
1779	432	2.242	1.489	0.557	0.198	-0.002	-0.187
1780	432	0.055	1.346	0.553	0.183	-0.015	-0.191
1781	432	1.676	1.078	0.483	0.146	-0.031	-0.196
1782	432	0.486	0.712	0.357	0.091	-0.052	-0.201
1783	432	0.312	0.296	0.189	0.021	-0.077	-0.207
1784	432	0.412	-0.127	-0.001	-0.057	-0.103	-0.213
1785	432	-1.587	-0.506	-0.192	-0.138	-0.132	-0.219
1786	432	-1.424	-0.761	-0.363	-0.214	-0.16	-0.226
1787	432	0.297	-0.927	-0.504	-0.283	-0.189	-0.233
1788	432	-0.344	-1.105	-0.611	-0.341	-0.216	-0.24
1789	432	-1.543	-1.266	-0.677	-0.386	-0.242	-0.246
1790	432	-1.879	-1.278	-0.693	-0.414	-0.266	-0.253
1791	432	-2.818	-1.033	-0.657	-0.426	-0.287	-0.26
1792	432	-0.872	-0.54	-0.581	-0.423	-0.306	-0.266
1793	432	1.649	-0.016	-0.493	-0.413	-0.324	-0.273
1794	432	0.948	0.283	-0.42	-0.4	-0.342	-0.279
1795	432	0.811	0.283	-0.378	-0.39	-0.359	-0.285
1796	432	-0.24	0.036	-0.365	-0.383	-0.376	-0.292
1797	432	0.407	-0.34	-0.371	-0.378	-0.393	-0.298
1798	432	-1.451	-0.725	-0.381	-0.374	-0.41	-0.303
1799	432	-1.238	-0.944	-0.377	-0.367	-0.426	-0.309
1800	432	-2.863	-0.89	-0.347	-0.357	-0.441	-0.314
1801	432	-0.755	-0.553	-0.292	-0.345	-0.455	-0.319
1802	432	1.96	-0.143	-0.231	-0.336	-0.47	-0.324
1803	432	0.546	0.113	-0.186	-0.334	-0.484	-0.328
1804	432	-1.005	0.214	-0.164	-0.343	-0.5	-0.332
1805	432	0.291	0.224	-0.166	-0.362	-0.516	-0.336
1806	432	1.057	0.096	-0.197	-0.393	-0.532	-0.339
1807	432	1.301	-0.218	-0.256	-0.436	-0.549	-0.343
1808	432	-1.793	-0.625	-0.334	-0.488	-0.565	-0.345
1809	432	-2.36	-0.88	-0.409	-0.544	-0.58	-0.348
1810	432	-1.295	-0.856	-0.47	-0.601	-0.593	-0.35
1811	432	-0.046	-0.623	-0.525	-0.657	-0.603	-0.351
1812	432	-1.03	-0.322	-0.586	-0.715	-0.611	-0.352
1813	432	0.046	-0.062	-0.665	-0.774	-0.616	-0.353
1814	432	1.673	-0.005	-0.777	-0.836	-0.618	-0.352
1815	432	0.88	-0.283	-0.927	-0.898	-0.617	-0.352
1816	432	-1.594	-0.814	-1.1	-0.955	-0.611	-0.351
1817	432	-1.91	-1.376	-1.267	-0.999	-0.6	-0.349
1818	432	-2.618	-1.812	-1.401	-1.023	-0.583	-0.347
1819	432	-1.682	-2.058	-1.481	-1.019	-0.558	-0.344
1820	432	-2.293	-2.141	-1.493	-0.986	-0.525	-0.341
1821	432	-2.382	-2.073	-1.433	-0.922	-0.486	-0.337
1822	432	-1.028	-1.88	-1.298	-0.826	-0.439	-0.332
1823	432	-2.086	-1.601	-1.097	-0.704	-0.387	-0.328
1824	432	-1.455	-1.21	-0.838	-0.558	-0.329	-0.323
1825	432	-0.714	-0.712	-0.535	-0.396	-0.269	-0.317
1826	432	-0.715	-0.152	-0.211	-0.225	-0.207	-0.313
1827	432	0.615	0.403	0.112	-0.055	-0.146	-0.308
1828	432	2.718	0.836	0.405	0.105	-0.088	-0.304
1829	432	0.069	1.084	0.648	0.247	-0.034	-0.3
1830	432	1.367	1.258	0.835	0.366	0.015	-0.297
1831	432	0.333	1.418	0.961	0.459	0.056	-0.295
1832	432	1.374	1.576	1.023	0.523	0.09	-0.294
1833	432	2.582	1.635	1.015	0.556	0.116	-0.294
1834	432	2.398	1.468	0.934	0.559	0.132	-0.295
1835	432	0.937	1.07	0.792	0.534	0.14	-0.296
1836	432	0.316	0.549	0.61	0.487	0.14	-0.299
1837	432	0.446	0.021	0.416	0.427	0.133	-0.303
1838	432	-0.974	-0.416	0.233	0.36	0.12	-0.308
1839	432	-1.646	-0.64	0.084	0.294	0.102	-0.314
1840	432	-0.752	-0.603	-0.021	0.232	0.08	-0.32
1841	432	-0.576	-0.38	-0.083	0.177	0.054	-0.327
1842	432	0.145	-0.091	-0.114	0.126	0.024	-0.335
1843	432	0.405	0.126	-0.129	0.079	-0.009	-0.344
1844	432	1.679	0.156	-0.143	0.033	-0.047	-0.353
1845	432	0.387	-0.037	-0.161	-0.014	-0.087	-0.362
1846	432	-1.265	-0.315	-0.176	-0.059	-0.131	-0.372
1847	432	-1.048	-0.48	-0.177	-0.102	-0.177	-0.383
1848	432	-1.689	-0.438	-0.16	-0.143	-0.225	-0.394
1849	432	0.159	-0.208	-0.131	-0.183	-0.275	-0.404
1850	432	0.367	0.053	-0.106	-0.227	-0.327	-0.416
1851	432	1.57	0.202	-0.102	-0.279	-0.381	-0.427
1852	432	-0.336	0.176	-0.128	-0.341	-0.437	-0.438
1853	432	-0.388	0.046	-0.185	-0.414	-0.494	-0.449
1854	432	1.252	-0.144	-0.27	-0.498	-0.552	-0.46
1855	432	-1.456	-0.373	-0.38	-0.59	-0.609	-0.47
1856	432	-1.219	-0.515	-0.504	-0.688	-0.667	-0.481
1857	432	-1.286	-0.537	-0.637	-0.79	-0.722	-0.49
1858	432	0.556	-0.526	-0.783	-0.895	-0.775	-0.499
1859	432	0.182	-0.641	-0.945	-1	-0.824	-0.507
1860	432	-1.365	-0.921	-1.122	-1.104	-0.87	-0.515
1861	432	-0.768	-1.308	-1.299	-1.202	-0.91	-0.521
1862	432	-1.158	-1.751	-1.463	-1.288	-0.944	-0.526
1863	432	-2.73	-2.141	-1.596	-1.357	-0.971	-0.53
1864	432	-3.62	-2.308	-1.679	-1.404	-0.99	-0.533
1865	432	-3.073	-2.162	-1.704	-1.425	-0.999	-0.534
1866	432	-1.492	-1.788	-1.679	-1.421	-1	-0.534
1867	432	-0.205	-1.393	-1.623	-1.396	-0.993	-0.533
1868	432	-1.027	-1.144	-1.556	-1.354	-0.978	-0.53
1869	432	-0.118	-1.076	-1.486	-1.297	-0.956	-0.526
1870	432	-1.884	-1.155	-1.412	-1.226	-0.927	-0.521
1871	432	-2.19	-1.265	-1.326	-1.141	-0.892	-0.515
1872	432	-0.086	-1.362	-1.221	-1.041	-0.852	-0.507
1873	432	-0.43	-1.486	-1.095	-0.93	-0.806	-0.499
1874	432	-3.212	-1.541	-0.94	-0.808	-0.757	-0.489
1875	432	-2.65	-1.33	-0.744	-0.674	-0.704	-0.479
1876	432	-1.106	-0.838	-0.512	-0.534	-0.649	-0.468
1877	432	0.5	-0.236	-0.266	-0.394	-0.593	-0.456
1878	432	1.658	0.259	-0.034	-0.264	-0.538	-0.444
1879	432	0.97	0.538	0.162	-0.15	-0.486	-0.431
1880	432	-0.303	0.669	0.315	-0.057	-0.437	-0.419
1881	432	-0.055	0.774	0.423	0.015	-0.393	-0.406
1882	432	1.64	0.863	0.484	0.062	-0.353	-0.393
1883	432	0.963	0.856	0.49	0.083	-0.319	-0.38
1884	432	0.471	0.736	0.442	0.079	-0.29	-0.368
1885	432	1.981	0.509	0.348	0.052	-0.266	-0.355
1886	432	-0.477	0.194	0.215	0.006	-0.247	-0.343
1887	432	-1.625	-0.061	0.064	-0.052	-0.231	-0.331
1888	432	0.29	-0.179	-0.091	-0.117	-0.217	-0.319
1889	432	0.352	-0.251	-0.246	-0.185	-0.205	-0.308
1890	432	-1.01	-0.346	-0.399	-0.252	-0.195	-0.296
1891	432	-0.373	-0.473	-0.54	-0.314	-0.184	-0.285
1892	432	1.098	-0.693	-0.667	-0.367	-0.173	-0.274
1893	432	-0.964	-1.028	-0.77	-0.407	-0.16	-0.263
1894	432	-2.708	-1.308	-0.832	-0.428	-0.146	-0.252
1895	432	-2.739	-1.348	-0.835	-0.427	-0.128	-0.242
1896	432	-0.864	-1.141	-0.775	-0.402	-0.107	-0.231
1897	432	-0.038	-0.855	-0.668	-0.356	-0.083	-0.221
1898	432	0.39	-0.645	-0.53	-0.294	-0.057	-0.211
1899	432	0.241	-0.544	-0.37	-0.22	-0.03	-0.201
1900	432	-2.021	-0.439	-0.193	-0.136	-0.002	-0.192
1901	432	-1.546	-0.148	0.003	-0.045	0.026	-0.184
1902	432	0.756	0.33	0.203	0.047	0.054	-0.175
1903	432	1.574	0.82	0.381	0.134	0.08	-0.168
1904	432	1.331	1.176	0.515	0.207	0.102	-0.161
1905	432	1.647	1.345	0.591	0.264	0.12	-0.156
1906	432	0.873	1.317	0.606	0.302	0.134	-0.151
1907	432	1.47	1.105	0.565	0.321	0.143	-0.147
1908	432	1.67	0.696	0.478	0.324	0.147	-0.144
1909	432	1.298	0.125	0.361	0.314	0.147	-0.142
1910	432	-1.994	-0.429	0.245	0.298	0.143	-0.14
1911	432	-3.28	-0.681	0.161	0.283	0.136	-0.14
1912	432	0.578	-0.548	0.124	0.272	0.128	-0.14
1913	432	0.183	-0.224	0.124	0.265	0.116	-0.141
1914	432	-1.065	0.153	0.148	0.259	0.102	-0.142
1915	432	1.766	0.487	0.18	0.251	0.085	-0.144
1916	432	2.172	0.599	0.201	0.236	0.064	-0.147
1917	432	0.425	0.45	0.204	0.214	0.04	-0.151
1918	432	-0.697	0.2	0.196	0.185	0.013	-0.155
1919	432	-0.728	0.023	0.189	0.151	-0.018	-0.159
1920	432	0.058	-0.021	0.186	0.112	-0.05	-0.164
1921	432	-0.178	0.028	0.184	0.067	-0.085	-0.169
1922	432	0.533	0.116	0.177	0.016	-0.121	-0.175
1923	432	0.272	0.177	0.156	-0.045	-0.16	-0.181
1924	432	0.919	0.188	0.115	-0.115	-0.2	-0.187
1925	432	-0.293	0.166	0.049	-0.195	-0.241	-0.193
1926	432	-1.47	0.192	-0.04	-0.283	-0.282	-0.199
1927	432	0.616	0.277	-0.154	-0.379	-0.323	-0.205
1928	432	1.909	0.255	-0.305	-0.482	-0.363	-0.211
1929	432	0.231	-0.002	-0.496	-0.59	-0.401	-0.216
1930	432	-0.014	-0.44	-0.716	-0.699	-0.437	-0.221
1931	432	-2.83	-0.923	-0.944	-0.801	-0.469	-0.226
1932	432	-0.412	-1.315	-1.154	-0.889	-0.496	-0.23
1933	432	-0.95	-1.646	-1.332	-0.956	-0.516	-0.233
1934	432	-4.282	-1.879	-1.462	-0.997	-0.529	-0.235
1935	432	-0.05	-1.947	-1.527	-1.008	-0.534	-0.237
1936	432	-2.577	-1.966	-1.526	-0.988	-0.531	-0.237
1937	432	-1.994	-1.93	-1.457	-0.936	-0.52	-0.237
1938	432	-0.352	-1.851	-1.32	-0.855	-0.502	-0.235
1939	432	-2.207	-1.725	-1.12	-0.747	-0.477	-0.233
1940	432	-3.3	-1.405	-0.858	-0.616	-0.447	-0.23
1941	432	-1.438	-0.804	-0.545	-0.468	-0.413	-0.226
1942	432	1.419	-0.064	-0.212	-0.313	-0.376	-0.222
1943	432	0.35	0.599	0.106	-0.164	-0.339	-0.217
1944	432	0.92	1.101	0.38	-0.03	-0.304	-0.211
1945	432	3.213	1.363	0.588	0.08	-0.272	-0.206
1946	432	0.823	1.33	0.717	0.161	-0.245	-0.2
1947	432	1.902	1.124	0.769	0.212	-0.223	-0.194
1948	432	-0.737	0.879	0.756	0.232	-0.206	-0.188
1949	432	-0.017	0.756	0.694	0.226	-0.194	-0.182
1950	432	0.69	0.748	0.589	0.196	-0.187	-0.176
1951	432	1.734	0.725	0.442	0.143	-0.185	-0.169
1952	432	0.651	0.556	0.253	0.071	-0.186	-0.163
1953	432	0.99	0.216	0.034	-0.016	-0.191	-0.156
1954	432	-0.214	-0.264	-0.198	-0.11	-0.198	-0.149
1955	432	-0.737	-0.766	-0.42	-0.203	-0.205	-0.142
1956	432	-3.03	-1.151	-0.606	-0.286	-0.212	-0.134
1957	432	-0.689	-1.319	-0.739	-0.354	-0.216	-0.126
1958	432	-0.583	-1.352	-0.815	-0.402	-0.218	-0.118
1959	432	-2.073	-1.295	-0.836	-0.43	-0.216	-0.109
1960	432	-1.036	-1.114	-0.802	-0.437	-0.211	-0.099
1961	432	-1.574	-0.837	-0.722	-0.424	-0.202	-0.09
1962	432	0.725	-0.522	-0.611	-0.395	-0.19	-0.079
1963	432	-0.44	-0.269	-0.486	-0.354	-0.175	-0.068
1964	432	-0.92	-0.072	-0.358	-0.305	-0.158	-0.057
1965	432	1.339	0.067	-0.235	-0.252	-0.139	-0.046
1966	432	0.182	0.088	-0.129	-0.197	-0.119	-0.035
1967	432	-0.32	0.042	-0.037	-0.144	-0.098	-0.023
1968	432	-0.539	0.014	0.042	-0.092	-0.076	-0.012
1969	432	0.889	0.039	0.112	-0.044	-0.053	0
1970	432	-0.652	0.107	0.171	-0.001	-0.031	0.012
1971	432	-0.553	0.265	0.221	0.037	-0.008	0.023
1972	432	0.541	0.478	0.257	0.068	0.014	0.035
1973	432	1.911	0.611	0.27	0.091	0.036	0.046
1974	432	0.605	0.545	0.254	0.103	0.057	0.057
1975	432	1.26	0.303	0.213	0.107	0.077	0.068
1976	432	-0.229	-0.029	0.161	0.104	0.096	0.079
1977	432	-2.701	-0.271	0.115	0.101	0.115	0.089
1978	432	0.54	-0.299	0.088	0.101	0.135	0.099
1979	432	1.309	-0.226	0.076	0.103	0.156	0.108
1980	432	-1.764	-0.102	0.075	0.108	0.177	0.118
1981	432	-0.645	0.162	0.084	0.116	0.198	0.127
1982	432	1.04	0.502	0.095	0.128	0.22	0.135
1983	432	1.295	0.74	0.091	0.14	0.241	0.143
1984	432	1.292	0.747	0.064	0.152	0.262	0.15
1985	432	0.681	0.48	0.014	0.165	0.283	0.157
1986	432	1.643	-0.027	-0.044	0.181	0.303	0.163
1987	432	-0.476	-0.663	-0.089	0.205	0.324	0.169
1988	432	-3.604	-1.133	-0.087	0.244	0.345	0.173
1989	432	-2.73	-1.143	-0.009	0.303	0.368	0.178
1990	432	0.017	-0.693	0.143	0.38	0.391	0.181
1991	432	-0.419	0.008	0.348	0.469	0.413	0.184
1992	432	0.579	0.769	0.575	0.56	0.434	0.187
1993	432	4.163	1.372	0.789	0.646	0.451	0.188
1994	432	1.219	1.638	0.96	0.716	0.463	0.188
1995	432	1.549	1.664	1.078	0.768	0.47	0.187
1996	432	1.217	1.572	1.144	0.798	0.47	0.185
1997	432	0.943	1.451	1.16	0.807	0.465	0.182
1998	432	1.11	1.339	1.131	0.794	0.453	0.177
1999	432	2.308	1.205	1.059	0.76	0.435	0.172
2000	432	0.114	1.01	0.948	0.706	0.411	0.166
2001	432	1.686	0.799	0.809	0.636	0.382	0.158
2002	432	0.162	0.578	0.652	0.554	0.349	0.15
2003	432	-0.56	0.409	0.487	0.463	0.313	0.141
2004	432	0.729	0.309	0.325	0.368	0.274	0.131
2005	432	1.005	0.197	0.168	0.271	0.234	0.121

## Sheet: A_PDSIv3_avgUppMid
year	ncnt	annual	X10yrmn	X20yrmn	X30yrmn	X50yrmn	X100yrmn
365	18	-0.022	-0.146	-0.211	-0.138	-0.174	-0.354
366	18	0.822	-0.245	-0.196	-0.122	-0.171	-0.359
367	18	-0.819	-0.403	-0.177	-0.108	-0.169	-0.364
368	18	-0.823	-0.496	-0.145	-0.092	-0.169	-0.37
369	18	-1.075	-0.424	-0.096	-0.075	-0.17	-0.376
370	18	-1.264	-0.152	-0.032	-0.059	-0.173	-0.382
371	18	0.654	0.254	0.036	-0.045	-0.179	-0.389
372	18	0.58	0.605	0.085	-0.039	-0.187	-0.396
373	18	2.429	0.721	0.101	-0.046	-0.199	-0.404
374	18	2.249	0.478	0.071	-0.066	-0.214	-0.412
375	18	-1.228	-0.028	0.007	-0.098	-0.233	-0.42
376	18	-0.827	-0.501	-0.066	-0.136	-0.254	-0.429
377	18	-1.813	-0.735	-0.128	-0.177	-0.278	-0.438
378	18	-2.399	-0.615	-0.168	-0.218	-0.303	-0.448
379	18	-0.442	-0.195	-0.192	-0.259	-0.329	-0.458
380	18	1.512	0.254	-0.223	-0.303	-0.357	-0.468
381	18	2.653	0.419	-0.287	-0.355	-0.386	-0.478
382	18	1.309	0.172	-0.393	-0.416	-0.418	-0.488
383	18	-1.992	-0.324	-0.526	-0.482	-0.45	-0.498
384	18	-1.808	-0.77	-0.659	-0.545	-0.482	-0.508
385	18	-1.738	-1.041	-0.771	-0.601	-0.514	-0.518
386	18	-0.63	-1.177	-0.854	-0.648	-0.544	-0.528
387	18	0.192	-1.307	-0.909	-0.683	-0.572	-0.538
388	18	-1.464	-1.482	-0.932	-0.708	-0.598	-0.547
389	18	-1.848	-1.579	-0.915	-0.721	-0.621	-0.556
390	18	-2.816	-1.446	-0.852	-0.72	-0.642	-0.565
391	18	-2.424	-0.992	-0.748	-0.708	-0.661	-0.573
392	18	-0.681	-0.31	-0.625	-0.69	-0.678	-0.58
393	18	2.112	0.308	-0.518	-0.675	-0.694	-0.588
394	18	2.149	0.546	-0.461	-0.67	-0.71	-0.594
395	18	1.678	0.303	-0.469	-0.68	-0.727	-0.601
396	18	-0.717	-0.269	-0.529	-0.702	-0.745	-0.607
397	18	-2.386	-0.849	-0.612	-0.732	-0.762	-0.612
398	18	-2.853	-1.163	-0.689	-0.762	-0.777	-0.617
399	18	-0.973	-1.155	-0.748	-0.789	-0.791	-0.622
400	18	-0.153	-0.979	-0.792	-0.815	-0.803	-0.626
401	18	-2.155	-0.79	-0.829	-0.84	-0.813	-0.629
402	18	2.217	-0.693	-0.866	-0.865	-0.821	-0.631
403	18	-0.974	-0.832	-0.91	-0.889	-0.827	-0.633
404	18	-1.407	-1.092	-0.954	-0.912	-0.831	-0.634
405	18	-1.547	-1.304	-0.984	-0.93	-0.833	-0.634
406	18	-2.636	-1.341	-0.992	-0.94	-0.831	-0.633
407	18	-1.718	-1.144	-0.975	-0.942	-0.826	-0.632
408	18	-0.754	-0.809	-0.946	-0.937	-0.818	-0.63
409	18	1.179	-0.525	-0.921	-0.928	-0.807	-0.627
410	18	-0.709	-0.445	-0.917	-0.919	-0.794	-0.624
411	18	0.489	-0.55	-0.932	-0.909	-0.78	-0.619
412	18	-1.645	-0.778	-0.962	-0.896	-0.763	-0.615
413	18	-1.764	-0.989	-0.989	-0.877	-0.743	-0.609
414	18	-0.342	-1.126	-1.004	-0.849	-0.721	-0.603
415	18	-2.48	-1.214	-1	-0.812	-0.697	-0.596
416	18	0.223	-1.25	-0.968	-0.764	-0.67	-0.589
417	18	-1.748	-1.303	-0.909	-0.705	-0.642	-0.581
418	18	0.198	-1.334	-0.818	-0.637	-0.611	-0.573
419	18	-2.829	-1.274	-0.692	-0.56	-0.579	-0.564
420	18	-3.118	-0.943	-0.527	-0.474	-0.547	-0.555
421	18	0.289	-0.343	-0.334	-0.385	-0.515	-0.545
422	18	0.508	0.276	-0.145	-0.3	-0.484	-0.536
423	18	2.877	0.678	0.009	-0.228	-0.456	-0.526
424	18	1.64	0.726	0.109	-0.175	-0.432	-0.517
425	18	-1.174	0.54	0.156	-0.14	-0.411	-0.507
426	18	-0.489	0.349	0.165	-0.124	-0.395	-0.498
427	18	0.979	0.205	0.141	-0.123	-0.383	-0.489
428	18	0.336	0.048	0.088	-0.138	-0.374	-0.479
429	18	0.521	-0.116	0.012	-0.167	-0.369	-0.47
430	18	-2.223	-0.212	-0.077	-0.206	-0.366	-0.462
431	18	-0.759	-0.148	-0.168	-0.25	-0.366	-0.453
432	18	0.486	-0.035	-0.264	-0.301	-0.367	-0.444
433	18	1.979	-0.091	-0.374	-0.356	-0.37	-0.435
434	18	1.127	-0.439	-0.501	-0.414	-0.373	-0.427
435	18	-2.6	-0.934	-0.627	-0.47	-0.376	-0.418
436	18	-2.814	-1.258	-0.724	-0.516	-0.379	-0.41
437	18	-1.635	-1.264	-0.776	-0.548	-0.378	-0.401
438	18	-0.908	-1.02	-0.786	-0.566	-0.376	-0.392
439	18	-1.541	-0.673	-0.767	-0.57	-0.371	-0.384
440	18	2.086	-0.387	-0.734	-0.563	-0.363	-0.375
441	18	-0.395	-0.35	-0.705	-0.55	-0.354	-0.366
442	18	0.356	-0.517	-0.677	-0.529	-0.343	-0.357
443	18	-2.148	-0.763	-0.641	-0.501	-0.33	-0.348
444	18	-1.62	-0.905	-0.584	-0.462	-0.314	-0.339
445	18	0.253	-0.903	-0.5	-0.413	-0.297	-0.33
446	18	-1.931	-0.798	-0.394	-0.357	-0.278	-0.321
447	18	-0.243	-0.555	-0.267	-0.296	-0.258	-0.312
448	18	-0.29	-0.222	-0.132	-0.233	-0.237	-0.303
449	18	0.251	0.155	-0.003	-0.173	-0.217	-0.295
450	18	-0.922	0.534	0.106	-0.121	-0.197	-0.287
451	18	2.983	0.844	0.18	-0.08	-0.179	-0.279
452	18	0.395	0.919	0.201	-0.054	-0.164	-0.271
453	18	1.644	0.764	0.17	-0.044	-0.152	-0.263
454	18	0.371	0.41	0.096	-0.047	-0.142	-0.257
455	18	-0.785	-0.037	-0.004	-0.06	-0.133	-0.25
456	18	0.886	-0.472	-0.107	-0.077	-0.127	-0.243
457	18	-1.916	-0.832	-0.194	-0.092	-0.121	-0.237
458	18	-2.653	-0.961	-0.246	-0.102	-0.115	-0.231
459	18	0.575	-0.824	-0.254	-0.104	-0.109	-0.225
460	18	-1.17	-0.556	-0.228	-0.099	-0.104	-0.22
461	18	-0.412	-0.202	-0.178	-0.089	-0.098	-0.214
462	18	0.018	0.155	-0.118	-0.076	-0.094	-0.209
463	18	1.73	0.395	-0.067	-0.065	-0.09	-0.203
464	18	0.331	0.409	-0.038	-0.057	-0.089	-0.198
465	18	2.226	0.226	-0.033	-0.055	-0.089	-0.194
466	18	-2.804	-0.051	-0.044	-0.056	-0.091	-0.189
467	18	-0.338	-0.183	-0.055	-0.057	-0.093	-0.184
468	18	0.361	-0.168	-0.061	-0.058	-0.097	-0.18
469	18	-0.841	-0.08	-0.064	-0.059	-0.102	-0.175
470	18	-0.496	0.041	-0.067	-0.061	-0.108	-0.171
471	18	3.089	0.072	-0.075	-0.065	-0.116	-0.166
472	18	-0.576	-0.104	-0.094	-0.071	-0.124	-0.162
473	18	-2.395	-0.319	-0.11	-0.079	-0.134	-0.157
474	18	1.057	-0.428	-0.11	-0.084	-0.144	-0.153
475	18	-1.077	-0.476	-0.097	-0.089	-0.155	-0.148
476	18	0.025	-0.424	-0.069	-0.093	-0.166	-0.143
477	18	-0.831	-0.244	-0.031	-0.097	-0.178	-0.138
478	18	-2.286	0.106	0.012	-0.103	-0.19	-0.132
479	18	2.326	0.559	0.045	-0.113	-0.203	-0.126
480	18	1.664	0.828	0.041	-0.134	-0.218	-0.12
481	18	2.004	0.769	-0.014	-0.166	-0.233	-0.114
482	18	-0.441	0.405	-0.116	-0.21	-0.25	-0.107
483	18	0.591	-0.114	-0.246	-0.26	-0.267	-0.1
484	18	-1.364	-0.677	-0.381	-0.31	-0.282	-0.092
485	18	-0.593	-1.138	-0.496	-0.355	-0.296	-0.084
486	18	-2.688	-1.389	-0.573	-0.389	-0.307	-0.075
487	18	-2.342	-1.32	-0.596	-0.409	-0.314	-0.066
488	18	-1.658	-0.965	-0.569	-0.416	-0.318	-0.055
489	18	2.106	-0.517	-0.509	-0.412	-0.318	-0.044
490	90	-0.792	-0.202	-0.443	-0.402	-0.316	-0.032
491	90	-0.321	-0.003	-0.379	-0.39	-0.31	-0.02
492	90	0.389	0.093	-0.326	-0.377	-0.302	-0.007
493	90	0.39	0.061	-0.292	-0.365	-0.291	0.007
494	90	0.398	-0.097	-0.276	-0.354	-0.277	0.021
495	90	0.126	-0.32	-0.274	-0.345	-0.261	0.037
496	90	-2.437	-0.479	-0.274	-0.333	-0.242	0.052
497	90	-1.63	-0.433	-0.264	-0.318	-0.22	0.069
498	90	2.047	-0.267	-0.248	-0.3	-0.194	0.085
499	90	0.016	-0.18	-0.238	-0.28	-0.165	0.103
500	90	-0.774	-0.156	-0.233	-0.258	-0.133	0.121
501	90	-0.82	-0.115	-0.23	-0.234	-0.098	0.139
502	90	0.287	-0.056	-0.225	-0.205	-0.059	0.158
503	90	0.752	-0.054	-0.223	-0.173	-0.018	0.177
504	90	-0.279	-0.151	-0.222	-0.136	0.026	0.196
505	90	-0.549	-0.297	-0.213	-0.093	0.073	0.215
506	90	0.634	-0.44	-0.188	-0.041	0.124	0.235
507	90	-2.074	-0.532	-0.14	0.021	0.177	0.255
508	90	-1.186	-0.458	-0.057	0.095	0.232	0.274
509	90	2.387	-0.255	0.055	0.179	0.29	0.294
510	90	-2.587	-0.009	0.188	0.27	0.35	0.313
511	90	-0.592	0.386	0.34	0.368	0.41	0.332
512	90	3.648	0.809	0.493	0.467	0.47	0.35
513	90	0.816	1.045	0.626	0.562	0.528	0.368
514	90	-0.218	1.142	0.734	0.65	0.584	0.385
515	90	2.135	1.163	0.82	0.732	0.638	0.401
516	90	1.732	1.05	0.881	0.805	0.688	0.416
517	90	0.803	0.827	0.924	0.87	0.734	0.431
518	90	0.243	0.613	0.962	0.928	0.776	0.444
519	90	-0.485	0.536	1.009	0.983	0.815	0.456
520	90	1.238	0.654	1.069	1.034	0.849	0.467
521	90	0.003	0.927	1.139	1.08	0.878	0.476
522	90	0.32	1.325	1.21	1.119	0.902	0.484
523	90	2.967	1.71	1.266	1.148	0.92	0.491
524	90	4.322	1.85	1.285	1.162	0.932	0.497
525	90	1.042	1.68	1.261	1.16	0.937	0.5
526	90	-0.951	1.409	1.208	1.145	0.935	0.503
527	90	2.218	1.181	1.143	1.122	0.928	0.504
528	90	3.083	0.907	1.067	1.09	0.915	0.503
529	90	-1.471	0.599	0.991	1.053	0.897	0.502
530	90	-1.131	0.469	0.934	1.015	0.875	0.499
531	90	2.51	0.53	0.9	0.978	0.848	0.494
532	90	0.974	0.625	0.879	0.94	0.818	0.489
533	90	-0.924	0.77	0.868	0.9	0.784	0.482
534	90	0.797	1.025	0.864	0.858	0.747	0.474
535	90	1.681	1.279	0.851	0.812	0.706	0.466
536	90	2.993	1.361	0.814	0.757	0.661	0.456
537	90	1.118	1.18	0.744	0.693	0.614	0.445
538	90	1.095	0.822	0.649	0.622	0.564	0.434
539	90	-0.468	0.417	0.546	0.546	0.512	0.421
540	90	-0.238	0.099	0.45	0.47	0.459	0.409
541	90	0.235	-0.092	0.371	0.395	0.407	0.395
542	90	-0.315	-0.165	0.313	0.324	0.355	0.382
543	90	-0.475	-0.109	0.277	0.256	0.304	0.368
544	90	-0.067	0.07	0.257	0.19	0.254	0.354
545	90	-0.246	0.324	0.242	0.126	0.207	0.34
546	90	1.599	0.561	0.217	0.059	0.161	0.326
547	90	1.366	0.659	0.164	-0.012	0.117	0.311
548	90	-0.088	0.603	0.076	-0.088	0.076	0.298
549	90	0.45	0.461	-0.043	-0.167	0.037	0.284
550	90	0.351	0.25	-0.19	-0.246	0.001	0.27
551	90	-0.308	-0.032	-0.355	-0.323	-0.03	0.257
552	90	-0.022	-0.383	-0.526	-0.392	-0.056	0.245
553	90	0.05	-0.818	-0.689	-0.448	-0.076	0.233
554	90	-0.853	-1.299	-0.823	-0.487	-0.09	0.221
555	90	-3.262	-1.677	-0.904	-0.502	-0.097	0.211
556	90	-2.586	-1.776	-0.911	-0.487	-0.096	0.201
557	90	-1.143	-1.592	-0.838	-0.444	-0.087	0.192
558	90	-0.806	-1.237	-0.697	-0.374	-0.072	0.184
559	90	-0.905	-0.785	-0.504	-0.283	-0.051	0.176
560	90	-1.167	-0.257	-0.277	-0.177	-0.025	0.17
561	90	0.47	0.302	-0.039	-0.063	0.003	0.163
562	90	2.072	0.753	0.184	0.051	0.033	0.158
563	90	1.614	0.985	0.367	0.158	0.063	0.152
564	90	0.299	1.046	0.504	0.252	0.091	0.147
565	90	-0.045	1.062	0.598	0.333	0.117	0.142
566	90	1.487	1.071	0.651	0.398	0.139	0.137
567	90	1.584	0.985	0.662	0.448	0.158	0.133
568	90	1.006	0.749	0.638	0.481	0.173	0.128
569	90	1.314	0.387	0.592	0.5	0.184	0.124
570	90	-0.39	-0.013	0.542	0.509	0.191	0.12
571	90	-1.48	-0.267	0.51	0.512	0.194	0.115
572	90	-0.744	-0.24	0.511	0.512	0.194	0.111
573	90	-0.127	0.057	0.542	0.508	0.191	0.108
574	90	0.01	0.521	0.589	0.499	0.184	0.104
575	90	1.698	1.008	0.629	0.478	0.172	0.1
576	90	1.89	1.329	0.637	0.443	0.156	0.096
577	90	2.207	1.372	0.596	0.39	0.135	0.093
578	90	1.808	1.121	0.501	0.319	0.11	0.089
579	90	-0.438	0.68	0.362	0.234	0.081	0.086
580	90	0.28	0.215	0.199	0.141	0.05	0.082
581	90	-0.044	-0.203	0.028	0.044	0.018	0.08
582	90	-1.042	-0.52	-0.134	-0.051	-0.014	0.077
583	90	-1.28	-0.679	-0.273	-0.14	-0.045	0.075
584	90	-0.369	-0.689	-0.384	-0.218	-0.074	0.073
585	90	-0.793	-0.625	-0.467	-0.285	-0.1	0.072
586	90	0.089	-0.551	-0.526	-0.341	-0.123	0.072
587	90	-0.788	-0.522	-0.566	-0.384	-0.142	0.072
588	90	-0.262	-0.539	-0.589	-0.415	-0.157	0.073
589	90	0.101	-0.604	-0.597	-0.434	-0.168	0.074
590	90	-1.599	-0.681	-0.586	-0.44	-0.174	0.076
591	90	-0.99	-0.678	-0.554	-0.433	-0.175	0.079
592	90	-0.697	-0.588	-0.501	-0.414	-0.171	0.082
593	90	0.215	-0.461	-0.434	-0.385	-0.163	0.086
594	90	-0.598	-0.35	-0.359	-0.348	-0.15	0.091
595	90	-0.045	-0.25	-0.281	-0.305	-0.134	0.096
596	90	-0.518	-0.153	-0.202	-0.258	-0.114	0.101
597	90	0.319	-0.052	-0.126	-0.209	-0.09	0.106
598	90	-0.325	0.043	-0.057	-0.159	-0.064	0.112
599	90	0.167	0.137	0.003	-0.11	-0.035	0.118
600	90	-0.119	0.21	0.051	-0.063	-0.005	0.124
601	90	1.093	0.226	0.085	-0.019	0.027	0.131
602	90	0.879	0.137	0.103	0.023	0.06	0.137
603	90	-0.712	-0.003	0.111	0.062	0.095	0.143
604	90	-0.635	-0.059	0.12	0.101	0.13	0.149
605	90	-0.223	0.034	0.137	0.142	0.166	0.154
606	90	-0.716	0.258	0.159	0.184	0.202	0.16
607	90	1.07	0.525	0.182	0.228	0.239	0.165
608	90	1.28	0.655	0.195	0.27	0.275	0.169
609	90	2.312	0.517	0.192	0.31	0.31	0.173
610	90	0.752	0.102	0.182	0.35	0.344	0.176
611	90	-2.112	-0.376	0.188	0.394	0.377	0.179
612	90	-1.081	-0.635	0.237	0.447	0.41	0.181
613	90	-1.136	-0.569	0.341	0.51	0.441	0.182
614	90	-0.99	-0.178	0.494	0.581	0.471	0.182
615	90	0.768	0.448	0.681	0.655	0.499	0.181
616	90	1.063	1.126	0.87	0.723	0.523	0.179
617	90	2.441	1.685	1.031	0.779	0.542	0.176
618	90	3.676	1.974	1.136	0.815	0.555	0.172
619	90	1.391	1.965	1.172	0.827	0.561	0.167
620	90	0.516	1.809	1.142	0.817	0.561	0.16
621	90	1.452	1.609	1.058	0.786	0.554	0.151
622	90	2.068	1.316	0.925	0.736	0.541	0.142
623	90	1.8	0.848	0.753	0.671	0.522	0.131
624	90	1.136	0.225	0.563	0.596	0.499	0.119
625	90	-1.305	-0.394	0.384	0.519	0.472	0.106
626	90	-2.167	-0.751	0.246	0.449	0.443	0.092
627	90	-2.131	-0.7	0.17	0.389	0.413	0.077
628	90	-0.153	-0.299	0.15	0.342	0.381	0.061
629	90	1.865	0.211	0.164	0.302	0.348	0.044
630	90	-0.576	0.609	0.184	0.266	0.314	0.026
631	90	2.221	0.82	0.194	0.229	0.278	0.008
632	90	2.652	0.725	0.177	0.189	0.239	-0.011
633	90	-1.169	0.37	0.134	0.146	0.199	-0.031
634	90	0.02	-0.003	0.083	0.103	0.157	-0.051
635	90	-0.724	-0.259	0.035	0.062	0.114	-0.072
636	90	-1.279	-0.316	-0.001	0.026	0.071	-0.094
637	90	-0.518	-0.162	-0.021	-0.007	0.028	-0.115
638	90	0.22	0.091	-0.036	-0.037	-0.016	-0.137
639	90	1.088	0.276	-0.058	-0.068	-0.061	-0.159
640	90	1.661	0.247	-0.098	-0.101	-0.107	-0.181
641	90	0.328	-0.014	-0.157	-0.139	-0.154	-0.203
642	90	-1.951	-0.351	-0.218	-0.177	-0.201	-0.225
643	90	-0.795	-0.575	-0.267	-0.212	-0.249	-0.247
644	90	-0.287	-0.661	-0.296	-0.245	-0.296	-0.269
645	90	-1.183	-0.639	-0.306	-0.275	-0.342	-0.29
646	90	-0.278	-0.52	-0.299	-0.303	-0.389	-0.311
647	90	-0.469	-0.355	-0.283	-0.333	-0.435	-0.331
648	90	0.039	-0.187	-0.269	-0.365	-0.482	-0.35
649	90	0.052	-0.06	-0.266	-0.403	-0.528	-0.369
650	90	-0.209	0.009	-0.282	-0.449	-0.575	-0.388
651	90	0.6	0.01	-0.324	-0.504	-0.621	-0.405
652	90	-0.684	-0.067	-0.393	-0.568	-0.668	-0.421
653	90	-0.13	-0.195	-0.488	-0.641	-0.713	-0.437
654	90	-0.055	-0.395	-0.606	-0.72	-0.758	-0.451
655	90	-0.182	-0.684	-0.74	-0.803	-0.801	-0.464
656	90	-1.331	-1.033	-0.88	-0.888	-0.841	-0.476
657	90	-1.237	-1.359	-1.012	-0.968	-0.877	-0.486
658	90	-1.31	-1.593	-1.124	-1.042	-0.909	-0.495
659	90	-3.105	-1.653	-1.206	-1.104	-0.935	-0.502
660	90	-2.396	-1.464	-1.252	-1.154	-0.956	-0.508
661	90	-1.32	-1.119	-1.274	-1.191	-0.971	-0.511
662	90	1.357	-0.848	-1.29	-1.219	-0.98	-0.513
663	90	0.691	-0.87	-1.318	-1.24	-0.983	-0.514
664	90	-2.343	-1.141	-1.357	-1.254	-0.98	-0.512
665	90	-2.244	-1.428	-1.389	-1.256	-0.971	-0.509
666	90	-1.839	-1.602	-1.398	-1.243	-0.955	-0.504
667	90	-1.354	-1.658	-1.381	-1.214	-0.932	-0.497
668	90	-1.396	-1.628	-1.335	-1.17	-0.902	-0.489
669	90	-2.141	-1.514	-1.26	-1.11	-0.866	-0.479
670	90	-1.411	-1.3	-1.155	-1.035	-0.825	-0.467
671	90	-0.716	-1.035	-1.03	-0.949	-0.777	-0.454
672	90	-1.194	-0.784	-0.892	-0.854	-0.726	-0.439
673	90	0.096	-0.597	-0.751	-0.755	-0.671	-0.423
674	90	0.652	-0.535	-0.616	-0.653	-0.614	-0.405
675	90	-1.024	-0.571	-0.487	-0.551	-0.554	-0.387
676	90	-1.983	-0.548	-0.358	-0.45	-0.494	-0.368
677	90	-0.259	-0.359	-0.226	-0.35	-0.433	-0.348
678	90	0.012	-0.059	-0.1	-0.253	-0.372	-0.327
679	90	0.081	0.272	0.011	-0.164	-0.313	-0.305
680	90	0.488	0.561	0.095	-0.085	-0.255	-0.283
681	90	1.438	0.715	0.144	-0.018	-0.201	-0.261
682	90	1.306	0.645	0.153	0.036	-0.149	-0.238
683	90	0.622	0.355	0.129	0.078	-0.101	-0.215
684	90	-0.337	-0.059	0.088	0.113	-0.057	-0.192
685	90	0.017	-0.462	0.054	0.144	-0.015	-0.169
686	90	-1.456	-0.728	0.044	0.177	0.024	-0.146
687	90	-2.152	-0.71	0.075	0.216	0.062	-0.122
688	90	-1.071	-0.358	0.149	0.259	0.096	-0.099
689	90	1.2	0.188	0.251	0.305	0.128	-0.076
690	90	1.15	0.703	0.354	0.348	0.157	-0.054
691	90	0.717	1.061	0.437	0.382	0.181	-0.032
692	90	2.225	1.201	0.487	0.405	0.201	-0.01
693	90	1.878	1.062	0.496	0.416	0.215	0.012
694	90	0.435	0.704	0.47	0.414	0.226	0.033
695	90	-0.551	0.288	0.428	0.405	0.233	0.053
696	90	0.618	-0.05	0.388	0.39	0.236	0.073
697	90	-0.961	-0.253	0.362	0.373	0.237	0.092
698	90	-1.214	-0.234	0.361	0.356	0.236	0.111
699	90	0.358	0.014	0.384	0.339	0.234	0.129
700	90	-0.419	0.383	0.418	0.319	0.23	0.147
701	90	1.435	0.758	0.446	0.294	0.225	0.164
702	90	2.34	0.965	0.448	0.258	0.218	0.181
703	90	1.406	0.916	0.41	0.212	0.209	0.197
704	90	-0.25	0.698	0.335	0.155	0.2	0.213
705	90	0.18	0.456	0.234	0.092	0.192	0.228
706	90	-0.381	0.244	0.117	0.026	0.184	0.242
707	90	0.269	0.049	-0.009	-0.039	0.178	0.256
708	90	1.747	-0.212	-0.141	-0.1	0.175	0.27
709	90	-0.805	-0.563	-0.271	-0.155	0.175	0.283
710	90	-2.316	-0.826	-0.378	-0.196	0.181	0.296
711	90	-1.526	-0.834	-0.446	-0.218	0.191	0.308
712	90	-0.731	-0.602	-0.473	-0.22	0.207	0.32
713	90	-0.24	-0.256	-0.47	-0.203	0.229	0.332
714	90	0.019	0.046	-0.448	-0.167	0.256	0.343
715	90	1.453	0.142	-0.418	-0.116	0.288	0.354
716	90	1.365	-0.095	-0.385	-0.05	0.324	0.364
717	90	0.333	-0.621	-0.336	0.032	0.365	0.373
718	90	-1.72	-1.181	-0.244	0.133	0.409	0.382
719	90	-4.367	-1.398	-0.078	0.259	0.457	0.39
720	90	-2.557	-1	0.178	0.408	0.508	0.397
721	90	-0.251	-0.083	0.508	0.574	0.561	0.403
722	90	2.391	1.019	0.865	0.744	0.613	0.408
723	90	2.939	1.948	1.2	0.903	0.661	0.412
724	90	3.239	2.507	1.473	1.04	0.704	0.414
725	90	3.92	2.661	1.66	1.146	0.739	0.415
726	90	0.715	2.506	1.757	1.219	0.765	0.413
727	90	2.903	2.245	1.774	1.258	0.783	0.41
728	90	1.434	1.94	1.722	1.265	0.792	0.406
729	90	1.11	1.665	1.614	1.244	0.792	0.399
730	90	2.215	1.444	1.466	1.197	0.783	0.391
731	90	-0.08	1.249	1.287	1.13	0.767	0.381
732	90	2.026	1.084	1.092	1.048	0.743	0.369
733	90	1.124	0.858	0.888	0.954	0.712	0.356
734	90	0.978	0.551	0.685	0.853	0.676	0.341
735	90	0.208	0.208	0.499	0.752	0.635	0.324
736	90	-1.818	-0.078	0.346	0.656	0.591	0.307
737	90	0.951	-0.244	0.238	0.57	0.545	0.288
738	90	0.796	-0.381	0.173	0.493	0.496	0.268
739	90	-1.731	-0.468	0.152	0.428	0.446	0.247
740	90	-0.318	-0.364	0.177	0.374	0.394	0.225
741	90	-0.958	-0.026	0.239	0.329	0.342	0.202
742	90	-1.555	0.534	0.32	0.29	0.289	0.178
743	90	2.895	1.155	0.392	0.249	0.234	0.154
744	90	3.743	1.482	0.413	0.198	0.177	0.128
745	90	1.417	1.344	0.365	0.132	0.117	0.102
746	90	1.272	0.85	0.254	0.051	0.055	0.075
747	90	0.039	0.19	0.099	-0.038	-0.007	0.048
748	90	-2.018	-0.408	-0.069	-0.132	-0.069	0.02
749	90	-1.581	-0.76	-0.224	-0.222	-0.13	-0.008
750	218	-0.118	-0.874	-0.355	-0.306	-0.189	-0.037
751	218	-0.518	-0.868	-0.46	-0.383	-0.245	-0.065
752	218	-1.318	-0.791	-0.54	-0.453	-0.298	-0.093
753	218	-1.017	-0.653	-0.597	-0.514	-0.347	-0.121
754	218	-0.071	-0.516	-0.638	-0.567	-0.392	-0.149
755	218	0.717	-0.483	-0.675	-0.615	-0.434	-0.177
756	218	-0.803	-0.59	-0.711	-0.658	-0.472	-0.205
757	218	-1.142	-0.741	-0.743	-0.695	-0.506	-0.232
758	218	-1.378	-0.842	-0.766	-0.724	-0.536	-0.259
759	218	-0.821	-0.861	-0.776	-0.746	-0.562	-0.286
760	218	-0.421	-0.829	-0.778	-0.762	-0.583	-0.312
761	218	-0.981	-0.778	-0.775	-0.771	-0.6	-0.337
762	218	-1.104	-0.702	-0.769	-0.776	-0.613	-0.362
763	218	-0.582	-0.614	-0.762	-0.775	-0.623	-0.387
764	218	0.072	-0.576	-0.76	-0.772	-0.63	-0.412
765	218	0.055	-0.639	-0.766	-0.765	-0.633	-0.435
766	218	-1.454	-0.767	-0.777	-0.756	-0.634	-0.459
767	218	-1.409	-0.853	-0.782	-0.742	-0.632	-0.482
768	218	-1.184	-0.859	-0.777	-0.723	-0.627	-0.505
769	218	-0.048	-0.83	-0.763	-0.698	-0.621	-0.527
770	218	-0.045	-0.839	-0.741	-0.669	-0.613	-0.549
771	218	-1.642	-0.865	-0.711	-0.636	-0.604	-0.571
772	218	-1.777	-0.805	-0.666	-0.598	-0.593	-0.592
773	218	-0.372	-0.642	-0.606	-0.556	-0.583	-0.613
774	218	-0.167	-0.472	-0.541	-0.513	-0.573	-0.634
775	218	0.471	-0.381	-0.479	-0.472	-0.564	-0.655
776	218	-0.419	-0.394	-0.423	-0.434	-0.557	-0.676
777	218	-0.915	-0.439	-0.372	-0.4	-0.552	-0.697
778	218	-0.304	-0.438	-0.322	-0.37	-0.55	-0.718
779	218	-1.364	-0.361	-0.273	-0.346	-0.551	-0.739
780	218	-0.082	-0.199	-0.228	-0.329	-0.555	-0.76
781	218	1.026	-0.045	-0.197	-0.321	-0.564	-0.781
782	218	-0.493	0.026	-0.187	-0.324	-0.577	-0.802
783	218	-0.605	0.037	-0.2	-0.34	-0.595	-0.823
784	218	1.079	-0.03	-0.237	-0.369	-0.617	-0.844
785	218	0.974	-0.247	-0.3	-0.41	-0.644	-0.865
786	218	-1.206	-0.552	-0.381	-0.462	-0.676	-0.887
787	218	-2.232	-0.747	-0.464	-0.52	-0.711	-0.908
788	218	-1.813	-0.709	-0.539	-0.583	-0.75	-0.929
789	218	0.028	-0.514	-0.609	-0.65	-0.791	-0.951
790	218	0.87	-0.377	-0.689	-0.723	-0.835	-0.972
791	218	-0.06	-0.453	-0.789	-0.802	-0.882	-0.992
792	218	-0.322	-0.745	-0.907	-0.886	-0.93	-1.013
793	218	-0.647	-1.17	-1.032	-0.972	-0.98	-1.033
794	218	-2.277	-1.578	-1.147	-1.055	-1.03	-1.052
795	218	-3.569	-1.771	-1.235	-1.131	-1.08	-1.071
796	218	-1.824	-1.658	-1.289	-1.198	-1.128	-1.089
797	218	-1.166	-1.356	-1.318	-1.257	-1.174	-1.107
798	218	-1.045	-1.042	-1.34	-1.311	-1.219	-1.123
799	218	0.573	-0.878	-1.372	-1.362	-1.262	-1.139
800	218	-0.184	-0.983	-1.426	-1.414	-1.304	-1.154
801	218	-1.314	-1.304	-1.498	-1.464	-1.344	-1.168
802	218	-2.419	-1.667	-1.573	-1.511	-1.381	-1.182
803	218	-2.94	-1.901	-1.634	-1.549	-1.414	-1.194
804	218	-2.417	-1.937	-1.671	-1.578	-1.444	-1.205
805	218	-1.004	-1.848	-1.686	-1.597	-1.47	-1.214
806	218	-1.25	-1.76	-1.686	-1.608	-1.492	-1.223
807	218	-2.139	-1.713	-1.675	-1.613	-1.51	-1.23
808	218	-1.436	-1.681	-1.652	-1.612	-1.524	-1.236
809	218	-1.815	-1.664	-1.62	-1.606	-1.535	-1.241
810	218	-1.183	-1.653	-1.58	-1.597	-1.542	-1.245
811	218	-2.056	-1.632	-1.535	-1.585	-1.545	-1.248
812	218	-1.977	-1.555	-1.485	-1.571	-1.545	-1.249
813	218	-1.486	-1.417	-1.435	-1.558	-1.542	-1.249
814	218	-0.75	-1.271	-1.392	-1.547	-1.537	-1.248
815	218	-1.343	-1.173	-1.366	-1.54	-1.528	-1.246
816	218	-0.799	-1.132	-1.361	-1.537	-1.518	-1.243
817	218	-0.971	-1.152	-1.378	-1.54	-1.505	-1.239
818	218	-1.701	-1.203	-1.416	-1.547	-1.489	-1.234
819	218	-1.881	-1.24	-1.469	-1.556	-1.471	-1.228
820	218	-0.965	-1.282	-1.534	-1.564	-1.45	-1.221
821	218	-0.557	-1.419	-1.61	-1.571	-1.426	-1.213
822	218	-0.633	-1.702	-1.691	-1.574	-1.399	-1.204
823	218	-2.838	-2.055	-1.762	-1.569	-1.368	-1.194
824	218	-3.392	-2.293	-1.8	-1.549	-1.333	-1.184
825	218	-2.349	-2.31	-1.791	-1.511	-1.293	-1.172
826	218	-2.391	-2.135	-1.734	-1.455	-1.25	-1.16
827	218	-1.808	-1.839	-1.634	-1.382	-1.202	-1.148
828	218	-1.223	-1.517	-1.503	-1.295	-1.152	-1.134
829	218	-0.425	-1.262	-1.355	-1.198	-1.1	-1.121
830	218	-0.851	-1.112	-1.198	-1.095	-1.047	-1.107
831	218	-2.166	-1.004	-1.036	-0.987	-0.994	-1.092
832	218	-0.339	-0.859	-0.871	-0.878	-0.941	-1.078
833	218	-0.813	-0.696	-0.708	-0.771	-0.89	-1.064
834	218	-0.769	-0.512	-0.555	-0.669	-0.842	-1.05
835	218	-0.3	-0.312	-0.415	-0.575	-0.797	-1.037
836	218	0.082	-0.13	-0.297	-0.493	-0.757	-1.023
837	218	0.047	0.002	-0.207	-0.426	-0.721	-1.01
838	218	-0.292	0.074	-0.148	-0.375	-0.691	-0.998
839	218	0.439	0.077	-0.119	-0.341	-0.667	-0.987
840	218	1.077	-0.027	-0.123	-0.325	-0.649	-0.976
841	218	-0.963	-0.217	-0.155	-0.325	-0.637	-0.966
842	218	-0.42	-0.368	-0.202	-0.34	-0.631	-0.956
843	218	-1.693	-0.405	-0.255	-0.365	-0.63	-0.947
844	218	-0.732	-0.312	-0.312	-0.401	-0.634	-0.939
845	218	1.446	-0.219	-0.379	-0.446	-0.642	-0.932
846	218	0.52	-0.289	-0.465	-0.501	-0.656	-0.925
847	218	-1.07	-0.502	-0.567	-0.564	-0.672	-0.919
848	218	-1.313	-0.726	-0.673	-0.631	-0.692	-0.913
849	218	-1.11	-0.882	-0.772	-0.698	-0.714	-0.908
850	218	-0.541	-0.973	-0.862	-0.763	-0.737	-0.903
851	218	-1.768	-1.029	-0.939	-0.824	-0.761	-0.899
852	218	-0.459	-1.061	-1.004	-0.88	-0.785	-0.895
853	218	-0.603	-1.13	-1.059	-0.93	-0.809	-0.892
854	218	-0.868	-1.24	-1.102	-0.973	-0.832	-0.888
855	218	-2.336	-1.314	-1.13	-1.008	-0.853	-0.885
856	218	-2.018	-1.25	-1.137	-1.034	-0.873	-0.882
857	218	-1.059	-1.063	-1.127	-1.051	-0.891	-0.88
858	218	-0.261	-0.872	-1.113	-1.062	-0.907	-0.877
859	218	-0.267	-0.803	-1.104	-1.069	-0.921	-0.874
860	218	-0.132	-0.902	-1.105	-1.074	-0.933	-0.871
861	218	-1.347	-1.124	-1.111	-1.075	-0.943	-0.869
862	218	-1.829	-1.336	-1.112	-1.072	-0.951	-0.866
863	218	-2.263	-1.421	-1.096	-1.063	-0.956	-0.863
864	218	-1.317	-1.341	-1.06	-1.048	-0.959	-0.861
865	218	-1.012	-1.156	-1.009	-1.028	-0.96	-0.858
866	218	-0.47	-0.944	-0.953	-1.007	-0.959	-0.855
867	218	-1.193	-0.753	-0.901	-0.986	-0.956	-0.852
868	218	-0.878	-0.591	-0.858	-0.968	-0.953	-0.849
869	218	0.188	-0.507	-0.831	-0.954	-0.948	-0.846
870	218	0.276	-0.57	-0.828	-0.946	-0.942	-0.843
871	218	-1.027	-0.767	-0.846	-0.943	-0.936	-0.84
872	218	-1.268	-0.981	-0.874	-0.944	-0.929	-0.836
873	218	-1.549	-1.113	-0.901	-0.945	-0.921	-0.833
874	218	-1.701	-1.106	-0.922	-0.945	-0.912	-0.83
875	218	-1.283	-0.976	-0.934	-0.944	-0.902	-0.826
876	218	0.047	-0.817	-0.945	-0.94	-0.89	-0.822
877	218	-0.358	-0.751	-0.962	-0.937	-0.878	-0.819
878	218	-0.796	-0.803	-0.986	-0.932	-0.865	-0.815
879	218	-0.818	-0.941	-1.013	-0.925	-0.85	-0.811
880	218	-1.105	-1.113	-1.035	-0.913	-0.835	-0.807
881	218	-1.525	-1.257	-1.043	-0.895	-0.819	-0.803
882	218	-1.544	-1.314	-1.031	-0.868	-0.802	-0.799
883	218	-1.336	-1.258	-0.993	-0.833	-0.784	-0.795
884	218	-1.576	-1.094	-0.932	-0.79	-0.765	-0.791
885	218	-0.769	-0.857	-0.852	-0.741	-0.746	-0.787
886	218	-0.246	-0.631	-0.762	-0.688	-0.728	-0.783
887	218	-0.585	-0.491	-0.673	-0.635	-0.71	-0.779
888	218	0.631	-0.474	-0.589	-0.585	-0.694	-0.775
889	218	-0.231	-0.588	-0.513	-0.538	-0.681	-0.771
890	218	-1.132	-0.72	-0.44	-0.496	-0.669	-0.768
891	218	-2.557	-0.701	-0.359	-0.459	-0.66	-0.764
892	218	-0.926	-0.443	-0.27	-0.426	-0.654	-0.761
893	218	0.901	-0.077	-0.188	-0.403	-0.651	-0.758
894	218	1.202	0.197	-0.134	-0.395	-0.652	-0.755
895	218	-0.085	0.29	-0.122	-0.404	-0.657	-0.753
896	218	0.391	0.237	-0.153	-0.43	-0.666	-0.751
897	218	0.862	0.062	-0.226	-0.474	-0.679	-0.749
898	218	-0.949	-0.185	-0.337	-0.532	-0.696	-0.747
899	218	-1.369	-0.384	-0.472	-0.602	-0.715	-0.745
900	218	0.098	-0.503	-0.62	-0.677	-0.735	-0.743
901	218	-0.914	-0.612	-0.78	-0.757	-0.757	-0.742
902	218	-0.987	-0.756	-0.943	-0.836	-0.778	-0.74
903	218	0.139	-0.999	-1.104	-0.912	-0.799	-0.738
904	218	-0.385	-1.409	-1.252	-0.981	-0.818	-0.736
905	218	-2.105	-1.915	-1.372	-1.037	-0.835	-0.734
906	218	-3.299	-2.314	-1.437	-1.075	-0.848	-0.731
907	218	-2.782	-2.422	-1.431	-1.09	-0.856	-0.727
908	218	-3.293	-2.172	-1.351	-1.082	-0.859	-0.724
909	218	-2.277	-1.59	-1.209	-1.054	-0.858	-0.72
910	218	-0.231	-0.844	-1.034	-1.013	-0.854	-0.715
911	218	0.68	-0.187	-0.864	-0.969	-0.846	-0.71
912	218	0.746	0.195	-0.731	-0.928	-0.838	-0.705
913	218	1.134	0.239	-0.653	-0.896	-0.828	-0.7
914	218	0.04	-0.018	-0.633	-0.876	-0.818	-0.694
915	218	-0.579	-0.429	-0.659	-0.864	-0.807	-0.689
916	218	-1.344	-0.82	-0.712	-0.857	-0.796	-0.683
917	218	-1.978	-1.048	-0.771	-0.851	-0.782	-0.677
918	218	-1.824	-1.051	-0.823	-0.843	-0.767	-0.67
919	218	-1.361	-0.895	-0.863	-0.831	-0.75	-0.664
920	218	1.198	-0.767	-0.898	-0.816	-0.732	-0.657
921	218	0.879	-0.867	-0.935	-0.798	-0.712	-0.65
922	218	-1.935	-1.161	-0.965	-0.776	-0.691	-0.643
923	218	-3.468	-1.401	-0.967	-0.744	-0.667	-0.635
924	218	-0.759	-1.428	-0.924	-0.7	-0.642	-0.628
925	218	-1.142	-1.303	-0.84	-0.645	-0.616	-0.62
926	218	-1.253	-1.062	-0.721	-0.58	-0.588	-0.613
927	218	-1.364	-0.716	-0.576	-0.51	-0.56	-0.605
928	218	-0.399	-0.308	-0.419	-0.438	-0.533	-0.598
929	218	1.337	0.046	-0.27	-0.371	-0.507	-0.591
930	218	0.745	0.236	-0.148	-0.313	-0.484	-0.584
931	218	-0.611	0.298	-0.058	-0.267	-0.464	-0.577
932	220	-0.302	0.329	-0.001	-0.234	-0.447	-0.571
933	220	0.754	0.329	0.023	-0.215	-0.433	-0.565
934	220	1.732	0.222	0.009	-0.212	-0.424	-0.559
935	220	-0.834	-0.004	-0.038	-0.224	-0.418	-0.554
936	220	-0.941	-0.213	-0.104	-0.246	-0.416	-0.549
937	220	-0.447	-0.334	-0.178	-0.277	-0.416	-0.544
938	220	0.101	-0.399	-0.255	-0.313	-0.419	-0.54
939	220	-0.182	-0.455	-0.335	-0.354	-0.423	-0.536
940	220	-0.684	-0.494	-0.415	-0.397	-0.429	-0.533
941	220	-1.974	-0.471	-0.489	-0.44	-0.437	-0.529
942	220	0.676	-0.394	-0.556	-0.481	-0.444	-0.526
943	220	0.346	-0.401	-0.625	-0.521	-0.453	-0.523
944	220	-0.902	-0.542	-0.695	-0.558	-0.461	-0.521
945	220	-0.491	-0.77	-0.759	-0.589	-0.469	-0.518
946	220	-0.374	-1.047	-0.809	-0.613	-0.475	-0.515
947	220	-1.732	-1.301	-0.833	-0.626	-0.481	-0.513
948	220	-2.213	-1.39	-0.819	-0.627	-0.484	-0.51
949	220	-2.408	-1.224	-0.763	-0.613	-0.486	-0.508
950	253	-0.377	-0.839	-0.673	-0.589	-0.485	-0.505
951	253	-0.175	-0.405	-0.569	-0.559	-0.484	-0.503
952	253	0.481	-0.065	-0.472	-0.527	-0.482	-0.5
953	253	1.007	0.084	-0.399	-0.499	-0.481	-0.498
954	253	-0.002	0.034	-0.356	-0.477	-0.48	-0.496
955	253	-0.658	-0.115	-0.34	-0.461	-0.48	-0.493
956	253	-0.728	-0.255	-0.342	-0.45	-0.48	-0.491
957	253	-0.265	-0.35	-0.356	-0.443	-0.481	-0.489
958	253	0.057	-0.424	-0.38	-0.439	-0.483	-0.487
959	253	-0.873	-0.491	-0.408	-0.439	-0.485	-0.485
960	253	-0.723	-0.525	-0.436	-0.44	-0.487	-0.483
961	253	-0.435	-0.529	-0.46	-0.442	-0.49	-0.481
962	253	-0.255	-0.538	-0.478	-0.445	-0.493	-0.479
963	253	-0.401	-0.571	-0.491	-0.448	-0.496	-0.477
964	253	-0.974	-0.613	-0.495	-0.45	-0.499	-0.475
965	253	-0.929	-0.634	-0.489	-0.452	-0.503	-0.472
966	253	0.371	-0.642	-0.473	-0.454	-0.506	-0.47
967	253	-0.556	-0.662	-0.451	-0.456	-0.509	-0.468
968	253	-1.561	-0.615	-0.42	-0.458	-0.513	-0.465
969	253	-1.712	-0.413	-0.382	-0.461	-0.516	-0.462
970	253	0.079	-0.095	-0.346	-0.467	-0.52	-0.459
971	253	1.842	0.145	-0.332	-0.479	-0.524	-0.456
972	253	0.818	0.139	-0.353	-0.5	-0.529	-0.453
973	253	-0.357	-0.079	-0.41	-0.529	-0.534	-0.45
974	253	-1.016	-0.37	-0.49	-0.564	-0.539	-0.447
975	253	-0.873	-0.622	-0.578	-0.599	-0.544	-0.443
976	253	-0.873	-0.805	-0.664	-0.633	-0.547	-0.439
977	253	-0.523	-0.931	-0.742	-0.662	-0.549	-0.435
978	253	-1.38	-1.018	-0.805	-0.684	-0.548	-0.43
979	253	-0.779	-1.052	-0.848	-0.697	-0.545	-0.426
980	253	-1.461	-1.038	-0.868	-0.7	-0.54	-0.42
981	253	-0.831	-0.972	-0.864	-0.692	-0.531	-0.415
982	253	-0.986	-0.886	-0.84	-0.674	-0.52	-0.409
983	253	-0.466	-0.809	-0.797	-0.645	-0.507	-0.403
984	253	-0.246	-0.768	-0.741	-0.609	-0.491	-0.396
985	253	-1.388	-0.744	-0.672	-0.564	-0.474	-0.39
986	253	-0.807	-0.67	-0.589	-0.513	-0.455	-0.383
987	253	-0.754	-0.539	-0.496	-0.457	-0.435	-0.376
988	253	-0.277	-0.377	-0.397	-0.399	-0.414	-0.369
989	253	0.572	-0.235	-0.301	-0.341	-0.393	-0.361
990	253	-0.746	-0.139	-0.213	-0.286	-0.373	-0.354
991	253	-0.27	-0.042	-0.134	-0.236	-0.353	-0.347
992	253	0.612	0.052	-0.068	-0.192	-0.335	-0.34
993	253	-0.425	0.116	-0.018	-0.157	-0.319	-0.333
994	253	0.146	0.163	0.016	-0.131	-0.305	-0.326
995	253	0.375	0.16	0.032	-0.114	-0.293	-0.319
996	253	0.74	0.066	0.028	-0.109	-0.283	-0.312
997	253	0.278	-0.12	0.009	-0.113	-0.276	-0.306
998	253	-0.504	-0.315	-0.018	-0.125	-0.27	-0.3
999	253	-1.779	-0.38	-0.042	-0.142	-0.266	-0.294
1000	253	-1.041	-0.225	-0.058	-0.163	-0.263	-0.288
1001	253	0.546	0.073	-0.075	-0.188	-0.261	-0.283
1002	253	1.23	0.325	-0.111	-0.22	-0.261	-0.278
1003	253	0.679	0.394	-0.176	-0.259	-0.261	-0.273
1004	253	0.399	0.257	-0.273	-0.305	-0.262	-0.268
1005	253	0.147	-0.052	-0.394	-0.354	-0.263	-0.264
1006	253	-0.686	-0.472	-0.525	-0.402	-0.264	-0.259
1007	253	-0.119	-0.922	-0.646	-0.443	-0.263	-0.255
1008	253	-1.687	-1.319	-0.739	-0.472	-0.26	-0.251
1009	253	-3.299	-1.512	-0.783	-0.484	-0.253	-0.247
1010	253	-1.366	-1.411	-0.767	-0.476	-0.243	-0.243
1011	253	-0.451	-1.123	-0.697	-0.449	-0.23	-0.239
1012	253	-0.834	-0.778	-0.588	-0.408	-0.214	-0.235
1013	253	-0.302	-0.436	-0.456	-0.355	-0.196	-0.232
1014	253	0.09	-0.143	-0.315	-0.296	-0.176	-0.229
1015	253	0.564	0.074	-0.181	-0.235	-0.156	-0.226
1016	253	-0.121	0.228	-0.064	-0.175	-0.136	-0.223
1017	253	-0.297	0.381	0.032	-0.119	-0.116	-0.221
1018	253	-0.038	0.552	0.103	-0.07	-0.098	-0.219
1019	253	1.419	0.667	0.14	-0.029	-0.081	-0.218
1020	253	1.725	0.592	0.137	0.002	-0.067	-0.218
1021	253	0.699	0.285	0.1	0.022	-0.055	-0.218
1022	253	-0.258	-0.147	0.045	0.035	-0.045	-0.218
1023	253	-1.297	-0.529	-0.004	0.047	-0.038	-0.219
1024	253	-1.233	-0.705	-0.027	0.06	-0.032	-0.221
1025	253	-1.507	-0.615	-0.013	0.077	-0.028	-0.223
1026	253	-0.613	-0.3	0.034	0.097	-0.025	-0.226
1027	253	1.084	0.088	0.1	0.117	-0.024	-0.229
1028	253	1.41	0.365	0.163	0.132	-0.027	-0.233
1029	253	0.347	0.47	0.21	0.139	-0.033	-0.237
1030	253	0.068	0.474	0.239	0.137	-0.043	-0.242
1031	253	0.237	0.45	0.249	0.125	-0.057	-0.248
1032	253	0.261	0.422	0.238	0.103	-0.074	-0.253
1033	253	0.738	0.377	0.205	0.072	-0.094	-0.26
1034	253	0.422	0.287	0.149	0.03	-0.118	-0.267
1035	253	-0.074	0.165	0.073	-0.02	-0.145	-0.274
1036	253	-0.146	0.036	-0.017	-0.078	-0.175	-0.282
1037	253	0.313	-0.097	-0.117	-0.14	-0.207	-0.29
1038	253	-0.309	-0.246	-0.222	-0.204	-0.24	-0.298
1039	253	-0.883	-0.39	-0.325	-0.269	-0.274	-0.306
1040	253	-0.14	-0.512	-0.42	-0.332	-0.308	-0.314
1041	253	-0.234	-0.641	-0.503	-0.392	-0.342	-0.322
1042	253	-1.177	-0.77	-0.572	-0.445	-0.375	-0.33
1043	253	-1.062	-0.848	-0.62	-0.492	-0.407	-0.338
1044	253	-0.636	-0.864	-0.647	-0.531	-0.437	-0.345
1045	253	-0.518	-0.833	-0.654	-0.563	-0.465	-0.352
1046	253	-1.268	-0.743	-0.645	-0.588	-0.491	-0.359
1047	253	-2.026	-0.557	-0.624	-0.606	-0.515	-0.365
1048	253	0.857	-0.324	-0.598	-0.622	-0.537	-0.371
1049	253	0.855	-0.226	-0.586	-0.637	-0.557	-0.376
1050	253	0.11	-0.334	-0.595	-0.654	-0.575	-0.381
1051	253	-0.901	-0.566	-0.619	-0.671	-0.592	-0.385
1052	253	-1.736	-0.771	-0.648	-0.688	-0.606	-0.389
1053	253	-0.877	-0.849	-0.67	-0.701	-0.617	-0.392
1054	253	-0.76	-0.808	-0.685	-0.711	-0.626	-0.394
1055	253	-1.555	-0.686	-0.695	-0.718	-0.632	-0.396
1056	253	0.146	-0.535	-0.703	-0.722	-0.635	-0.397
1057	253	0.36	-0.481	-0.718	-0.724	-0.636	-0.397
1058	253	-0.432	-0.578	-0.742	-0.726	-0.634	-0.396
1059	253	-0.917	-0.774	-0.769	-0.725	-0.629	-0.395
1060	253	-1.12	-0.982	-0.788	-0.72	-0.622	-0.393
1061	253	-0.933	-1.128	-0.791	-0.708	-0.612	-0.391
1062	253	-1.603	-1.154	-0.772	-0.688	-0.598	-0.387
1063	253	-2.345	-0.995	-0.726	-0.659	-0.582	-0.383
1064	253	-0.621	-0.664	-0.658	-0.623	-0.563	-0.379
1065	253	0.447	-0.324	-0.585	-0.584	-0.542	-0.373
1066	253	1.13	-0.147	-0.524	-0.545	-0.519	-0.368
1067	253	0.14	-0.194	-0.482	-0.508	-0.496	-0.361
1068	253	-1.065	-0.362	-0.455	-0.473	-0.472	-0.355
1069	253	-1.169	-0.499	-0.43	-0.438	-0.447	-0.347
1070	253	-0.738	-0.537	-0.401	-0.401	-0.422	-0.34
1071	253	-0.082	-0.497	-0.366	-0.364	-0.396	-0.332
1072	253	-0.231	-0.431	-0.327	-0.326	-0.37	-0.324
1073	253	-1.057	-0.347	-0.286	-0.288	-0.344	-0.315
1074	253	0.33	-0.239	-0.242	-0.252	-0.318	-0.307
1075	253	0.183	-0.155	-0.201	-0.217	-0.293	-0.298
1076	253	-1.036	-0.095	-0.163	-0.185	-0.269	-0.289
1077	253	0.531	-0.031	-0.129	-0.155	-0.246	-0.281
1078	253	0.037	-0.011	-0.103	-0.13	-0.225	-0.272
1079	253	0.522	-0.049	-0.083	-0.108	-0.205	-0.263
1080	253	-0.769	-0.122	-0.069	-0.091	-0.186	-0.255
1081	253	-0.157	-0.166	-0.054	-0.076	-0.169	-0.246
1082	253	-0.294	-0.167	-0.036	-0.064	-0.154	-0.238
1083	253	-0.131	-0.13	-0.017	-0.055	-0.139	-0.23
1084	253	0.304	-0.076	0.002	-0.048	-0.127	-0.222
1085	253	-0.258	-0.015	0.017	-0.046	-0.116	-0.215
1086	253	-0.238	0.072	0.027	-0.047	-0.106	-0.207
1087	253	0.137	0.183	0.029	-0.053	-0.098	-0.201
1088	253	0.572	0.275	0.015	-0.063	-0.091	-0.194
1089	253	-0.024	0.301	-0.017	-0.079	-0.085	-0.188
1090	253	1.166	0.236	-0.068	-0.099	-0.081	-0.182
1091	253	0.026	0.05	-0.136	-0.122	-0.078	-0.177
1092	253	-0.665	-0.197	-0.21	-0.145	-0.075	-0.171
1093	253	-0.167	-0.435	-0.278	-0.165	-0.071	-0.167
1094	253	-0.947	-0.638	-0.329	-0.179	-0.067	-0.162
1095	253	-0.493	-0.772	-0.353	-0.184	-0.063	-0.158
1096	253	-0.761	-0.819	-0.346	-0.18	-0.057	-0.154
1097	253	-1.663	-0.74	-0.305	-0.165	-0.049	-0.151
1098	253	-0.532	-0.508	-0.232	-0.141	-0.041	-0.148
1099	253	-0.052	-0.189	-0.139	-0.11	-0.032	-0.145
1100	253	0.678	0.129	-0.043	-0.077	-0.023	-0.143
1101	253	0.115	0.382	0.041	-0.045	-0.015	-0.141
1102	253	0.6	0.563	0.103	-0.018	-0.007	-0.14
1103	253	0.486	0.653	0.135	0.003	-0.001	-0.139
1104	253	1.355	0.622	0.133	0.016	0.003	-0.139
1105	253	0.282	0.446	0.098	0.022	0.005	-0.139
1106	253	0.292	0.167	0.041	0.023	0.006	-0.14
1107	253	0.329	-0.168	-0.025	0.02	0.005	-0.141
1108	253	-0.852	-0.489	-0.083	0.019	0.004	-0.143
1109	253	-1.464	-0.682	-0.117	0.022	0.001	-0.145
1110	253	-0.896	-0.678	-0.115	0.032	-0.002	-0.148
1111	253	-0.338	-0.504	-0.077	0.049	-0.006	-0.151
1112	253	-0.672	-0.226	-0.012	0.069	-0.011	-0.154
1113	253	0.253	0.092	0.069	0.09	-0.017	-0.158
1114	253	1.451	0.345	0.149	0.108	-0.026	-0.162
1115	253	0.437	0.464	0.214	0.12	-0.038	-0.167
1116	253	-0.167	0.497	0.259	0.122	-0.052	-0.172
1117	253	0.645	0.503	0.282	0.114	-0.069	-0.177
1118	253	1.023	0.471	0.279	0.094	-0.09	-0.183
1119	253	-0.046	0.407	0.249	0.063	-0.114	-0.19
1120	253	-0.656	0.361	0.196	0.021	-0.14	-0.196
1121	253	0.917	0.328	0.12	-0.031	-0.169	-0.203
1122	253	1.357	0.199	0.021	-0.093	-0.2	-0.21
1123	253	-0.094	-0.071	-0.101	-0.162	-0.233	-0.217
1124	253	-0.35	-0.39	-0.231	-0.236	-0.267	-0.224
1125	253	-1.516	-0.638	-0.355	-0.309	-0.3	-0.23
1126	253	-1.737	-0.715	-0.461	-0.378	-0.332	-0.237
1127	253	-0.318	-0.638	-0.545	-0.44	-0.363	-0.244
1128	253	0.058	-0.542	-0.615	-0.497	-0.392	-0.25
1129	253	0.154	-0.544	-0.679	-0.548	-0.419	-0.255
1130	253	-0.714	-0.668	-0.735	-0.592	-0.444	-0.261
1131	253	-0.802	-0.854	-0.78	-0.628	-0.465	-0.266
1132	253	-1.387	-1.026	-0.805	-0.653	-0.483	-0.27
1133	253	-1.068	-1.113	-0.805	-0.668	-0.497	-0.274
1134	253	-2.013	-1.08	-0.776	-0.671	-0.508	-0.277
1135	291	-0.252	-0.92	-0.723	-0.664	-0.514	-0.28
1136	291	-1.018	-0.705	-0.655	-0.65	-0.517	-0.281
1137	291	-0.421	-0.47	-0.581	-0.63	-0.517	-0.283
1138	291	-0.114	-0.263	-0.515	-0.609	-0.513	-0.284
1139	291	0.072	-0.132	-0.464	-0.589	-0.508	-0.284
1140	291	0.205	-0.104	-0.437	-0.572	-0.5	-0.284
1141	291	-0.234	-0.17	-0.433	-0.559	-0.491	-0.283
1142	291	-0.179	-0.288	-0.449	-0.548	-0.479	-0.282
1143	291	-0.97	-0.41	-0.478	-0.538	-0.466	-0.28
1144	291	-0.913	-0.494	-0.512	-0.528	-0.45	-0.278
1145	291	0.615	-0.564	-0.546	-0.515	-0.432	-0.275
1146	291	-0.991	-0.671	-0.576	-0.5	-0.412	-0.272
1147	291	-1.153	-0.762	-0.594	-0.479	-0.39	-0.268
1148	291	-1.006	-0.799	-0.591	-0.45	-0.366	-0.265
1149	291	-0.166	-0.796	-0.564	-0.414	-0.34	-0.26
1150	291	-0.993	-0.785	-0.514	-0.37	-0.312	-0.256
1151	291	-0.587	-0.74	-0.44	-0.318	-0.283	-0.251
1152	291	-0.304	-0.639	-0.344	-0.26	-0.252	-0.246
1153	291	-1.789	-0.44	-0.228	-0.198	-0.222	-0.241
1154	291	-0.18	-0.097	-0.099	-0.133	-0.191	-0.235
1155	291	0.246	0.303	0.027	-0.071	-0.162	-0.23
1156	291	1.262	0.625	0.131	-0.015	-0.134	-0.225
1157	291	1.727	0.746	0.198	0.029	-0.11	-0.22
1158	291	1.462	0.632	0.222	0.061	-0.088	-0.216
1159	291	-1.131	0.387	0.211	0.081	-0.07	-0.211
1160	291	-0.369	0.191	0.182	0.093	-0.055	-0.207
1161	291	0.721	0.069	0.145	0.099	-0.042	-0.204
1162	291	-0.066	-0.031	0.103	0.099	-0.033	-0.2
1163	291	-0.249	-0.111	0.062	0.096	-0.026	-0.197
1164	291	-0.084	-0.162	0.03	0.091	-0.021	-0.194
1165	291	-0.357	-0.189	0.01	0.085	-0.019	-0.192
1166	291	0.294	-0.198	0.004	0.08	-0.02	-0.19
1167	291	-0.742	-0.195	0.011	0.074	-0.022	-0.188
1168	291	0.503	-0.155	0.031	0.069	-0.026	-0.187
1169	291	-0.617	-0.08	0.06	0.062	-0.032	-0.186
1170	291	-0.803	0.069	0.095	0.054	-0.041	-0.185
1171	291	0.825	0.267	0.128	0.043	-0.051	-0.185
1172	291	1.062	0.402	0.145	0.024	-0.064	-0.185
1173	291	0.724	0.413	0.136	-0.002	-0.079	-0.185
1174	291	0.18	0.331	0.099	-0.037	-0.096	-0.186
1175	291	-0.143	0.231	0.04	-0.079	-0.115	-0.187
1176	291	-0.894	0.172	-0.037	-0.126	-0.136	-0.188
1177	291	0.955	0.142	-0.129	-0.176	-0.156	-0.189
1178	291	0.232	0.031	-0.238	-0.23	-0.178	-0.191
1179	291	0.526	-0.211	-0.359	-0.283	-0.199	-0.193
1180	291	-0.466	-0.571	-0.48	-0.334	-0.219	-0.194
1181	291	-1.307	-0.952	-0.583	-0.378	-0.237	-0.196
1182	291	-1.475	-1.238	-0.65	-0.409	-0.253	-0.198
1183	291	-1.783	-1.351	-0.67	-0.426	-0.266	-0.199
1184	291	-1.232	-1.258	-0.637	-0.427	-0.275	-0.201
1185	291	-1.653	-0.978	-0.559	-0.414	-0.282	-0.202
1186	315	-0.325	-0.555	-0.447	-0.39	-0.285	-0.203
1187	315	-0.489	-0.098	-0.324	-0.362	-0.287	-0.204
1188	315	1.188	0.284	-0.211	-0.334	-0.287	-0.205
1189	315	1.472	0.466	-0.129	-0.312	-0.286	-0.206
1190	315	-0.038	0.437	-0.088	-0.299	-0.286	-0.207
1191	315	-0.514	0.299	-0.085	-0.294	-0.285	-0.208
1192	315	1.182	0.11	-0.113	-0.297	-0.283	-0.209
1193	315	0.212	-0.139	-0.169	-0.307	-0.282	-0.21
1194	315	-1.882	-0.359	-0.238	-0.32	-0.28	-0.211
1195	315	-0.979	-0.437	-0.305	-0.333	-0.276	-0.212
1196	315	0.565	-0.422	-0.368	-0.344	-0.271	-0.212
1197	315	-0.43	-0.434	-0.426	-0.353	-0.265	-0.213
1198	315	-0.337	-0.503	-0.477	-0.357	-0.258	-0.214
1199	315	-0.254	-0.63	-0.516	-0.355	-0.249	-0.214
1200	315	-0.481	-0.789	-0.536	-0.345	-0.238	-0.214
1201	315	-1.582	-0.902	-0.528	-0.325	-0.226	-0.215
1202	315	-1.412	-0.867	-0.486	-0.294	-0.212	-0.215
1203	315	-1.283	-0.659	-0.409	-0.253	-0.197	-0.215
1204	315	0.478	-0.345	-0.307	-0.203	-0.181	-0.215
1205	315	-0.152	-0.046	-0.198	-0.15	-0.165	-0.216
1206	315	0.398	0.179	-0.091	-0.097	-0.149	-0.216
1207	315	0.58	0.291	0.002	-0.047	-0.135	-0.216
1208	315	0.761	0.277	0.077	-0.003	-0.124	-0.217
1209	315	0.236	0.17	0.134	0.033	-0.114	-0.218
1210	315	-0.617	0.067	0.178	0.063	-0.107	-0.219
1211	315	-0.497	0.063	0.216	0.085	-0.103	-0.22
1212	315	0.204	0.171	0.248	0.1	-0.102	-0.222
1213	315	0.245	0.328	0.268	0.105	-0.105	-0.224
1214	315	1.14	0.458	0.267	0.099	-0.11	-0.226
1215	315	0.031	0.495	0.242	0.081	-0.12	-0.228
1216	315	1.717	0.429	0.189	0.051	-0.132	-0.231
1217	315	-0.483	0.254	0.111	0.01	-0.149	-0.234
1218	315	-0.066	0.067	0.019	-0.039	-0.167	-0.237
1219	315	-0.843	-0.084	-0.08	-0.093	-0.188	-0.24
1220	315	0.589	-0.2	-0.179	-0.15	-0.21	-0.243
1221	315	-0.065	-0.347	-0.277	-0.208	-0.234	-0.247
1222	315	-1.056	-0.521	-0.366	-0.264	-0.257	-0.25
1223	315	-0.252	-0.68	-0.439	-0.316	-0.281	-0.253
1224	315	-0.398	-0.822	-0.493	-0.362	-0.303	-0.256
1225	315	-1.411	-0.901	-0.523	-0.401	-0.325	-0.259
1226	315	-1.754	-0.832	-0.526	-0.431	-0.344	-0.261
1227	315	-0.785	-0.592	-0.505	-0.453	-0.362	-0.264
1228	315	-0.042	-0.275	-0.475	-0.47	-0.378	-0.266
1229	315	0.251	-0.013	-0.452	-0.485	-0.393	-0.268
1230	315	0.933	0.09	-0.451	-0.501	-0.406	-0.269
1231	315	0.307	-0.017	-0.477	-0.519	-0.418	-0.271
1232	315	-0.764	-0.279	-0.524	-0.538	-0.429	-0.272
1233	315	0.243	-0.6	-0.581	-0.555	-0.437	-0.272
1234	315	-1.912	-0.906	-0.633	-0.568	-0.443	-0.273
1235	315	-1.638	-1.07	-0.666	-0.573	-0.446	-0.273
1236	315	-1.079	-1.065	-0.67	-0.568	-0.445	-0.272
1237	315	-0.601	-0.95	-0.647	-0.555	-0.442	-0.271
1238	315	-0.614	-0.789	-0.603	-0.534	-0.435	-0.27
1239	315	-0.848	-0.606	-0.543	-0.507	-0.426	-0.269
1240	315	-0.907	-0.406	-0.474	-0.476	-0.415	-0.267
1241	315	0.955	-0.226	-0.405	-0.444	-0.401	-0.265
1242	315	-0.343	-0.13	-0.346	-0.413	-0.386	-0.263
1243	315	-0.951	-0.08	-0.298	-0.384	-0.37	-0.26
1244	315	0.478	-0.05	-0.264	-0.359	-0.353	-0.258
1245	315	0.812	-0.097	-0.247	-0.337	-0.336	-0.255
1246	315	-0.397	-0.224	-0.244	-0.32	-0.318	-0.252
1247	315	-1.535	-0.327	-0.248	-0.304	-0.299	-0.25
1248	315	-0.813	-0.331	-0.249	-0.29	-0.28	-0.247
1249	315	1.625	-0.302	-0.249	-0.275	-0.26	-0.244
1250	315	-0.717	-0.337	-0.253	-0.262	-0.24	-0.242
1251	315	-1.344	-0.356	-0.253	-0.248	-0.219	-0.239
1252	315	-0.381	-0.294	-0.246	-0.233	-0.198	-0.237
1253	315	0.23	-0.202	-0.235	-0.215	-0.177	-0.235
1254	315	0.326	-0.152	-0.226	-0.197	-0.156	-0.233
1255	315	-0.191	-0.162	-0.219	-0.178	-0.136	-0.231
1256	315	-0.169	-0.191	-0.212	-0.157	-0.116	-0.23
1257	315	-1.414	-0.187	-0.202	-0.134	-0.096	-0.229
1258	315	0.7	-0.127	-0.186	-0.107	-0.077	-0.228
1259	315	0.166	-0.095	-0.168	-0.078	-0.059	-0.228
1260	315	-0.415	-0.114	-0.149	-0.047	-0.042	-0.228
1261	315	0.457	-0.166	-0.124	-0.014	-0.027	-0.229
1262	315	-0.606	-0.242	-0.091	0.022	-0.013	-0.23
1263	315	-0.433	-0.285	-0.043	0.06	-0.001	-0.232
1264	315	-0.075	-0.263	0.021	0.101	0.009	-0.234
1265	315	-0.655	-0.166	0.1	0.143	0.016	-0.237
1266	315	-0.242	0.021	0.192	0.183	0.02	-0.241
1267	315	0.713	0.26	0.287	0.219	0.021	-0.245
1268	315	0.929	0.484	0.372	0.247	0.017	-0.249
1269	315	-0.408	0.678	0.439	0.264	0.009	-0.255
1270	315	0.734	0.855	0.479	0.267	-0.004	-0.261
1271	315	2.244	0.928	0.483	0.253	-0.023	-0.268
1272	315	1.507	0.8	0.443	0.221	-0.047	-0.275
1273	315	-0.437	0.525	0.364	0.172	-0.076	-0.283
1274	315	0.284	0.244	0.262	0.109	-0.109	-0.292
1275	315	-0.713	0.013	0.146	0.035	-0.146	-0.301
1276	315	0.323	-0.149	0.026	-0.046	-0.186	-0.311
1277	315	-0.079	-0.286	-0.096	-0.132	-0.228	-0.32
1278	315	-0.265	-0.406	-0.216	-0.222	-0.272	-0.33
1279	315	-1.229	-0.48	-0.328	-0.313	-0.316	-0.341
1280	315	-0.375	-0.478	-0.432	-0.403	-0.36	-0.351
1281	315	-0.619	-0.441	-0.529	-0.49	-0.403	-0.361
1282	315	-0.308	-0.426	-0.624	-0.573	-0.445	-0.371
1283	315	0.558	-0.5	-0.722	-0.653	-0.486	-0.38
1284	315	-1.251	-0.695	-0.823	-0.728	-0.524	-0.39
1285	315	-0.353	-0.946	-0.92	-0.795	-0.558	-0.399
1286	315	-0.895	-1.203	-1.004	-0.852	-0.589	-0.408
1287	315	-3.369	-1.36	-1.064	-0.895	-0.616	-0.416
1288	315	-0.953	-1.314	-1.092	-0.922	-0.637	-0.423
1289	315	-1.19	-1.157	-1.094	-0.934	-0.653	-0.43
1290	315	-0.309	-0.994	-1.077	-0.933	-0.665	-0.436
1291	315	-0.647	-0.907	-1.05	-0.921	-0.672	-0.441
1292	315	-1.22	-0.901	-1.015	-0.898	-0.674	-0.446
1293	315	-0.398	-0.944	-0.97	-0.866	-0.673	-0.45
1294	315	-1.184	-1.018	-0.914	-0.825	-0.667	-0.454
1295	315	-1.08	-1.06	-0.844	-0.776	-0.658	-0.456
1296	315	-1.908	-1.008	-0.755	-0.72	-0.646	-0.458
1297	315	-1.091	-0.833	-0.648	-0.658	-0.631	-0.46
1298	315	0.618	-0.606	-0.532	-0.594	-0.614	-0.461
1299	315	-0.89	-0.415	-0.42	-0.532	-0.596	-0.461
1300	315	0.232	-0.242	-0.318	-0.475	-0.578	-0.461
1301	315	-0.81	-0.073	-0.231	-0.425	-0.561	-0.461
1302	315	-0.521	0.124	-0.165	-0.385	-0.544	-0.46
1303	315	0.776	0.3	-0.127	-0.356	-0.528	-0.459
1304	315	1.527	0.332	-0.128	-0.34	-0.514	-0.457
1305	315	0.053	0.159	-0.169	-0.339	-0.503	-0.455
1306	315	-0.105	-0.144	-0.239	-0.348	-0.493	-0.453
1307	315	-0.416	-0.48	-0.323	-0.365	-0.484	-0.451
1308	315	-1.321	-0.753	-0.405	-0.385	-0.477	-0.449
1309	315	-1.308	-0.871	-0.471	-0.404	-0.47	-0.446
1310	315	-1.896	-0.811	-0.514	-0.419	-0.463	-0.442
1311	315	0.768	-0.639	-0.535	-0.43	-0.456	-0.439
1312	315	-0.471	-0.508	-0.547	-0.438	-0.449	-0.435
1313	315	-0.319	-0.451	-0.551	-0.443	-0.442	-0.431
1314	315	-0.574	-0.459	-0.551	-0.446	-0.435	-0.427
1315	315	-0.511	-0.511	-0.545	-0.445	-0.429	-0.422
1316	315	0.16	-0.593	-0.533	-0.44	-0.422	-0.417
1317	315	-1.264	-0.677	-0.512	-0.432	-0.415	-0.412
1318	315	-1.164	-0.668	-0.478	-0.419	-0.407	-0.407
1319	315	-1.083	-0.529	-0.43	-0.402	-0.4	-0.401
1320	315	-0.54	-0.303	-0.374	-0.383	-0.392	-0.396
1321	315	1.114	-0.109	-0.322	-0.364	-0.385	-0.39
1322	315	0.595	-0.074	-0.285	-0.349	-0.378	-0.384
1323	315	-0.153	-0.186	-0.265	-0.339	-0.372	-0.378
1324	315	-0.988	-0.332	-0.256	-0.332	-0.366	-0.373
1325	315	-1.057	-0.394	-0.247	-0.327	-0.361	-0.367
1326	315	-0.114	-0.34	-0.239	-0.325	-0.356	-0.361
1327	315	-0.455	-0.217	-0.234	-0.325	-0.352	-0.355
1328	315	0.159	-0.073	-0.238	-0.328	-0.348	-0.349
1329	315	-0.462	0.034	-0.257	-0.336	-0.344	-0.343
1330	315	1.395	0.047	-0.293	-0.348	-0.34	-0.337
1331	315	0.145	-0.099	-0.349	-0.364	-0.337	-0.331
1332	315	-1.754	-0.336	-0.415	-0.382	-0.334	-0.325
1333	315	0.144	-0.572	-0.478	-0.398	-0.329	-0.319
1334	315	0.753	-0.839	-0.53	-0.41	-0.324	-0.313
1335	315	-2.618	-1.087	-0.561	-0.415	-0.317	-0.307
1336	315	-2.322	-1.125	-0.554	-0.41	-0.308	-0.301
1337	315	-0.941	-0.909	-0.507	-0.393	-0.297	-0.296
1338	315	0.206	-0.56	-0.433	-0.369	-0.285	-0.29
1339	315	-0.351	-0.214	-0.349	-0.34	-0.271	-0.284
1340	315	0.045	0.069	-0.27	-0.31	-0.257	-0.279
1341	315	1.092	0.233	-0.209	-0.283	-0.243	-0.273
1342	315	0.269	0.24	-0.173	-0.259	-0.229	-0.268
1343	315	-0.23	0.139	-0.163	-0.24	-0.215	-0.263
1344	315	0.182	-0.002	-0.171	-0.224	-0.202	-0.259
1345	315	-0.58	-0.151	-0.191	-0.211	-0.189	-0.254
1346	315	-0.444	-0.276	-0.215	-0.198	-0.176	-0.25
1347	315	0.753	-0.39	-0.237	-0.183	-0.163	-0.247
1348	315	-1.224	-0.504	-0.251	-0.167	-0.151	-0.243
1349	315	-1.189	-0.533	-0.246	-0.146	-0.139	-0.24
1350	315	0.033	-0.456	-0.22	-0.121	-0.127	-0.238
1351	315	-0.828	-0.324	-0.175	-0.092	-0.115	-0.235
1352	315	0.107	-0.169	-0.117	-0.062	-0.104	-0.233
1353	315	0.852	-0.053	-0.053	-0.031	-0.095	-0.232
1354	315	-0.9	-0.002	0.012	-0.002	-0.087	-0.231
1355	315	1.286	0.038	0.075	0.023	-0.081	-0.23
1356	315	-1.558	0.083	0.133	0.044	-0.077	-0.23
1357	315	0.61	0.212	0.185	0.059	-0.075	-0.23
1358	315	0.07	0.379	0.224	0.066	-0.076	-0.231
1359	315	0.856	0.525	0.241	0.063	-0.08	-0.233
1360	315	1.075	0.58	0.227	0.049	-0.088	-0.234
1361	315	0.478	0.513	0.18	0.023	-0.098	-0.237
1362	365	0.075	0.353	0.104	-0.013	-0.111	-0.24
1363	365	0.72	0.129	0.006	-0.058	-0.127	-0.243
1364	365	-0.276	-0.144	-0.105	-0.107	-0.144	-0.246
1365	365	-0.798	-0.398	-0.215	-0.157	-0.163	-0.25
1366	365	-0.632	-0.575	-0.313	-0.204	-0.182	-0.254
1367	365	-1.047	-0.666	-0.391	-0.247	-0.201	-0.259
1368	365	-0.331	-0.683	-0.445	-0.282	-0.22	-0.263
1369	365	-0.146	-0.675	-0.476	-0.31	-0.238	-0.268
1370	365	-1.677	-0.648	-0.484	-0.33	-0.255	-0.272
1371	365	-0.034	-0.57	-0.472	-0.342	-0.272	-0.277
1372	365	-0.359	-0.491	-0.444	-0.348	-0.288	-0.281
1373	365	-0.042	-0.425	-0.407	-0.35	-0.303	-0.286
1374	365	-1.045	-0.351	-0.365	-0.349	-0.317	-0.29
1375	365	-0.72	-0.222	-0.321	-0.345	-0.331	-0.294
1376	365	0.315	-0.067	-0.282	-0.342	-0.344	-0.298
1377	365	0.314	0.027	-0.257	-0.342	-0.358	-0.303
1378	365	0.45	0.006	-0.251	-0.347	-0.372	-0.307
1379	365	0.392	-0.132	-0.266	-0.357	-0.386	-0.31
1380	365	-1.42	-0.324	-0.294	-0.371	-0.4	-0.314
1381	365	-0.075	-0.466	-0.325	-0.387	-0.413	-0.317
1382	365	-0.964	-0.548	-0.354	-0.404	-0.426	-0.32
1383	365	-0.515	-0.556	-0.378	-0.422	-0.439	-0.323
1384	365	-0.549	-0.508	-0.397	-0.44	-0.45	-0.326
1385	365	-0.359	-0.43	-0.415	-0.459	-0.461	-0.328
1386	365	-0.544	-0.351	-0.435	-0.479	-0.47	-0.33
1387	365	0.048	-0.296	-0.46	-0.5	-0.479	-0.331
1388	365	0.023	-0.3	-0.494	-0.521	-0.486	-0.332
1389	365	-1.165	-0.36	-0.538	-0.544	-0.492	-0.333
1390	365	0.386	-0.451	-0.586	-0.565	-0.497	-0.333
1391	365	-0.485	-0.602	-0.639	-0.585	-0.5	-0.332
1392	365	-1.116	-0.772	-0.687	-0.6	-0.5	-0.332
1393	365	-1.023	-0.894	-0.721	-0.609	-0.499	-0.33
1394	365	-1.498	-0.94	-0.737	-0.609	-0.494	-0.328
1395	365	-0.54	-0.917	-0.73	-0.601	-0.487	-0.326
1396	365	-0.003	-0.884	-0.704	-0.584	-0.477	-0.323
1397	365	-1.868	-0.851	-0.66	-0.56	-0.465	-0.32
1398	365	-0.345	-0.755	-0.598	-0.528	-0.45	-0.316
1399	365	-1.052	-0.605	-0.521	-0.491	-0.434	-0.312
1400	365	-0.523	-0.403	-0.437	-0.449	-0.416	-0.307
1401	365	0.108	-0.194	-0.354	-0.407	-0.397	-0.302
1402	365	0.195	-0.035	-0.283	-0.367	-0.377	-0.297
1403	365	0.088	0.049	-0.23	-0.331	-0.357	-0.292
1404	434	-0.197	0.066	-0.197	-0.299	-0.338	-0.286
1405	434	0.508	0.028	-0.184	-0.273	-0.319	-0.281
1406	434	-0.48	-0.069	-0.186	-0.252	-0.3	-0.275
1407	434	0.259	-0.194	-0.199	-0.235	-0.282	-0.269
1408	434	-0.624	-0.336	-0.216	-0.22	-0.264	-0.263
1409	434	-0.295	-0.455	-0.228	-0.205	-0.247	-0.257
1410	434	-0.528	-0.525	-0.23	-0.19	-0.23	-0.251
1411	434	-1.032	-0.509	-0.215	-0.173	-0.214	-0.245
1412	434	-0.79	-0.383	-0.184	-0.155	-0.198	-0.24
1413	434	0.361	-0.186	-0.142	-0.135	-0.182	-0.234
1414	434	-0.267	0.002	-0.098	-0.116	-0.167	-0.228
1415	434	0.762	0.139	-0.06	-0.101	-0.154	-0.223
1416	434	0.024	0.185	-0.035	-0.09	-0.141	-0.217
1417	434	0.364	0.156	-0.025	-0.083	-0.13	-0.212
1418	434	0.095	0.069	-0.029	-0.081	-0.121	-0.208
1419	434	0.161	-0.037	-0.044	-0.082	-0.113	-0.203
1420	434	-0.794	-0.113	-0.064	-0.085	-0.106	-0.199
1421	434	-0.797	-0.104	-0.084	-0.09	-0.1	-0.195
1422	434	0.623	-0.039	-0.103	-0.094	-0.095	-0.192
1423	434	0.312	-0.02	-0.127	-0.099	-0.091	-0.189
1424	434	0.345	-0.09	-0.155	-0.105	-0.088	-0.186
1425	434	-0.355	-0.227	-0.183	-0.11	-0.085	-0.183
1426	434	-0.801	-0.361	-0.202	-0.112	-0.083	-0.181
1427	434	-0.491	-0.433	-0.206	-0.11	-0.081	-0.179
1428	434	-0.451	-0.438	-0.193	-0.104	-0.079	-0.177
1429	434	0.118	-0.385	-0.163	-0.093	-0.077	-0.176
1430	434	-1.285	-0.276	-0.118	-0.08	-0.076	-0.175
1431	434	-0.284	-0.084	-0.063	-0.064	-0.075	-0.175
1432	434	1.185	0.117	-0.008	-0.048	-0.075	-0.175
1433	434	0.212	0.238	0.036	-0.037	-0.077	-0.175
1434	434	-0.238	0.291	0.064	-0.03	-0.079	-0.176
1435	434	0.853	0.303	0.075	-0.029	-0.084	-0.177
1436	434	0.069	0.256	0.065	-0.034	-0.09	-0.178
1437	434	0.042	0.173	0.039	-0.046	-0.097	-0.18
1438	434	0.135	0.067	-0.001	-0.062	-0.106	-0.182
1439	434	0.272	-0.063	-0.051	-0.082	-0.116	-0.185
1440	434	-0.142	-0.209	-0.105	-0.104	-0.127	-0.188
1441	434	-0.836	-0.324	-0.156	-0.127	-0.138	-0.191
1442	434	-0.855	-0.356	-0.196	-0.148	-0.15	-0.195
1443	434	0.237	-0.321	-0.225	-0.167	-0.162	-0.199
1444	434	-0.337	-0.283	-0.246	-0.185	-0.174	-0.203
1445	434	-0.116	-0.263	-0.261	-0.2	-0.185	-0.207
1446	434	0.157	-0.271	-0.269	-0.213	-0.197	-0.212
1447	434	-1.332	-0.29	-0.273	-0.225	-0.208	-0.217
1448	434	-0.064	-0.283	-0.268	-0.234	-0.22	-0.222
1449	434	0.788	-0.303	-0.261	-0.243	-0.231	-0.227
1450	434	0.147	-0.382	-0.254	-0.251	-0.241	-0.232
1451	434	-2.588	-0.416	-0.242	-0.259	-0.252	-0.237
1452	434	-0.439	-0.275	-0.219	-0.264	-0.262	-0.242
1453	434	0.336	-0.047	-0.196	-0.271	-0.271	-0.248
1454	434	0.586	0.119	-0.186	-0.28	-0.281	-0.253
1455	434	1.622	0.121	-0.199	-0.295	-0.291	-0.259
1456	434	-0.732	-0.048	-0.235	-0.315	-0.301	-0.265
1457	434	-1.202	-0.24	-0.284	-0.338	-0.311	-0.27
1458	434	-0.695	-0.369	-0.335	-0.361	-0.32	-0.276
1459	434	1.004	-0.471	-0.387	-0.383	-0.328	-0.282
1460	434	-0.998	-0.606	-0.438	-0.404	-0.336	-0.287
1461	434	-0.924	-0.696	-0.479	-0.421	-0.342	-0.293
1462	434	-1.444	-0.675	-0.506	-0.432	-0.347	-0.298
1463	434	-1.068	-0.528	-0.517	-0.437	-0.351	-0.303
1464	434	0.296	-0.342	-0.518	-0.436	-0.353	-0.309
1465	434	0.72	-0.261	-0.521	-0.433	-0.354	-0.314
1466	434	0.378	-0.353	-0.529	-0.426	-0.354	-0.319
1467	434	-1.543	-0.548	-0.535	-0.416	-0.353	-0.323
1468	434	-1.303	-0.7	-0.528	-0.4	-0.352	-0.328
1469	434	-0.172	-0.766	-0.5	-0.378	-0.349	-0.333
1470	434	-1.085	-0.771	-0.451	-0.349	-0.345	-0.337
1471	434	-0.285	-0.707	-0.38	-0.316	-0.341	-0.341
1472	434	-1.16	-0.569	-0.29	-0.28	-0.337	-0.346
1473	434	-0.738	-0.333	-0.188	-0.243	-0.333	-0.35
1474	434	0.033	-0.037	-0.083	-0.208	-0.33	-0.354
1475	434	1.274	0.229	0.008	-0.182	-0.328	-0.358
1476	434	-0.139	0.394	0.071	-0.166	-0.329	-0.362
1477	434	0.348	0.487	0.099	-0.164	-0.332	-0.367
1478	434	0.803	0.504	0.088	-0.176	-0.338	-0.371
1479	434	0.897	0.42	0.035	-0.203	-0.346	-0.375
1480	434	-0.39	0.252	-0.057	-0.242	-0.357	-0.379
1481	434	-0.307	0.054	-0.177	-0.292	-0.369	-0.384
1482	434	0.484	-0.18	-0.315	-0.348	-0.383	-0.388
1483	434	-0.133	-0.495	-0.464	-0.407	-0.398	-0.392
1484	434	-0.503	-0.868	-0.609	-0.464	-0.412	-0.396
1485	434	-1.852	-1.208	-0.731	-0.515	-0.425	-0.4
1486	434	-2.021	-1.396	-0.813	-0.553	-0.436	-0.403
1487	434	-1.068	-1.387	-0.846	-0.576	-0.445	-0.406
1488	434	-2.105	-1.208	-0.833	-0.585	-0.452	-0.409
1489	434	-0.919	-0.893	-0.78	-0.579	-0.456	-0.411
1490	434	0.111	-0.561	-0.703	-0.564	-0.458	-0.413
1491	434	-0.065	-0.34	-0.619	-0.543	-0.459	-0.415
1492	434	0.452	-0.281	-0.54	-0.519	-0.459	-0.416
1493	434	0.108	-0.371	-0.471	-0.495	-0.458	-0.417
1494	434	-1.164	-0.5	-0.409	-0.471	-0.457	-0.418
1495	434	-2.071	-0.507	-0.347	-0.447	-0.456	-0.419
1496	434	-0.28	-0.328	-0.283	-0.424	-0.454	-0.419
1497	434	0.711	-0.077	-0.23	-0.405	-0.452	-0.419
1498	434	-0.124	0.115	-0.2	-0.394	-0.451	-0.419
1499	434	0.572	0.196	-0.201	-0.391	-0.451	-0.419
1500	434	0.91	0.119	-0.235	-0.398	-0.451	-0.418
1501	434	0.013	-0.112	-0.3	-0.414	-0.453	-0.418
1502	434	-1.056	-0.395	-0.383	-0.435	-0.455	-0.417
1503	434	-0.947	-0.612	-0.468	-0.457	-0.458	-0.416
1504	434	-0.976	-0.721	-0.544	-0.477	-0.459	-0.415
1505	434	-1.311	-0.736	-0.605	-0.493	-0.46	-0.413
1506	434	0.532	-0.724	-0.651	-0.504	-0.46	-0.411
1507	434	-0.671	-0.782	-0.683	-0.509	-0.459	-0.409
1508	434	-0.431	-0.893	-0.698	-0.507	-0.457	-0.406
1509	434	-2.094	-0.98	-0.687	-0.497	-0.454	-0.404
1510	434	-0.819	-0.947	-0.645	-0.477	-0.449	-0.401
1511	434	-1.465	-0.796	-0.575	-0.449	-0.443	-0.397
1512	434	0.034	-0.563	-0.484	-0.416	-0.437	-0.394
1513	434	-0.363	-0.336	-0.385	-0.381	-0.43	-0.39
1514	434	0.046	-0.155	-0.289	-0.347	-0.423	-0.386
1515	434	0.831	-0.047	-0.204	-0.318	-0.417	-0.382
1516	434	-1.324	0.007	-0.137	-0.295	-0.412	-0.378
1517	434	0.271	0.088	-0.088	-0.281	-0.408	-0.374
1518	434	-0.128	0.164	-0.061	-0.276	-0.405	-0.369
1519	434	1.05	0.182	-0.063	-0.283	-0.404	-0.365
1520	434	0.613	0.085	-0.096	-0.301	-0.404	-0.361
1521	434	-0.854	-0.088	-0.155	-0.329	-0.405	-0.356
1522	434	-0.332	-0.241	-0.23	-0.364	-0.407	-0.352
1523	434	-0.467	-0.344	-0.315	-0.404	-0.408	-0.347
1524	434	-0.853	-0.402	-0.404	-0.447	-0.409	-0.343
1525	434	-0.017	-0.446	-0.495	-0.489	-0.41	-0.338
1526	434	0.056	-0.546	-0.587	-0.53	-0.409	-0.334
1527	434	-0.169	-0.723	-0.677	-0.566	-0.406	-0.329
1528	434	-1.727	-0.91	-0.755	-0.595	-0.4	-0.324
1529	434	-2.112	-0.99	-0.808	-0.612	-0.392	-0.319
1530	434	-0.585	-0.942	-0.832	-0.615	-0.38	-0.313
1531	434	0.29	-0.876	-0.832	-0.606	-0.365	-0.308
1532	434	-1.243	-0.864	-0.811	-0.583	-0.347	-0.303
1533	434	-1.672	-0.855	-0.765	-0.547	-0.326	-0.297
1534	434	0.039	-0.831	-0.694	-0.498	-0.302	-0.292
1535	434	0.318	-0.845	-0.603	-0.437	-0.276	-0.286
1536	434	-1.766	-0.85	-0.489	-0.367	-0.248	-0.281
1537	434	-2.337	-0.68	-0.349	-0.287	-0.218	-0.276
1538	434	-0.348	-0.277	-0.187	-0.2	-0.188	-0.271
1539	434	0.653	0.219	-0.022	-0.113	-0.158	-0.266
1540	434	1.029	0.63	0.122	-0.032	-0.13	-0.262
1541	434	1.626	0.831	0.229	0.038	-0.104	-0.258
1542	434	1.694	0.77	0.289	0.093	-0.082	-0.255
1543	434	0.63	0.511	0.308	0.134	-0.064	-0.252
1544	434	-1.708	0.241	0.303	0.163	-0.049	-0.25
1545	434	-0.373	0.129	0.291	0.183	-0.038	-0.249
1546	434	0.767	0.134	0.276	0.195	-0.031	-0.249
1547	434	0.492	0.128	0.256	0.197	-0.028	-0.249
1548	434	1.621	0.044	0.23	0.191	-0.028	-0.249
1549	434	-1.555	-0.088	0.204	0.177	-0.033	-0.251
1550	434	-0.674	-0.103	0.187	0.157	-0.041	-0.253
1551	434	-0.345	0.036	0.18	0.133	-0.052	-0.255
1552	434	0.455	0.261	0.175	0.103	-0.066	-0.259
1553	434	0.712	0.454	0.158	0.065	-0.083	-0.263
1554	434	1.382	0.513	0.118	0.017	-0.104	-0.267
1555	434	0.442	0.391	0.049	-0.04	-0.128	-0.272
1556	434	0.257	0.14	-0.043	-0.106	-0.155	-0.277
1557	434	-0.308	-0.159	-0.15	-0.176	-0.183	-0.283
1558	434	-1.165	-0.412	-0.259	-0.247	-0.211	-0.289
1559	434	-0.172	-0.56	-0.36	-0.316	-0.241	-0.296
1560	434	-1.886	-0.615	-0.45	-0.38	-0.269	-0.302
1561	434	1.061	-0.601	-0.526	-0.438	-0.297	-0.309
1562	434	-1.09	-0.621	-0.594	-0.49	-0.323	-0.316
1563	434	-0.826	-0.651	-0.652	-0.534	-0.347	-0.323
1564	434	-0.422	-0.678	-0.699	-0.57	-0.37	-0.329
1565	434	-0.783	-0.709	-0.733	-0.596	-0.39	-0.336
1566	434	-1.337	-0.735	-0.755	-0.612	-0.407	-0.343
1567	434	0.459	-0.762	-0.764	-0.619	-0.422	-0.349
1568	434	-1.291	-0.828	-0.761	-0.616	-0.435	-0.355
1569	434	-1.155	-0.874	-0.741	-0.603	-0.444	-0.361
1570	434	-0.414	-0.862	-0.703	-0.58	-0.452	-0.367
1571	434	-1.812	-0.785	-0.646	-0.55	-0.457	-0.372
1572	434	-0.66	-0.624	-0.571	-0.512	-0.46	-0.378
1573	434	0.214	-0.454	-0.488	-0.47	-0.462	-0.383
1574	434	0.607	-0.366	-0.406	-0.428	-0.463	-0.387
1575	434	-1.369	-0.354	-0.328	-0.388	-0.465	-0.392
1576	434	-0.041	-0.324	-0.253	-0.352	-0.466	-0.396
1577	434	-1.024	-0.251	-0.183	-0.32	-0.468	-0.401
1578	434	1.061	-0.128	-0.122	-0.296	-0.471	-0.405
1579	434	-1.55	0.007	-0.077	-0.281	-0.475	-0.409
1580	434	0.489	0.183	-0.052	-0.277	-0.481	-0.412
1581	434	1.444	0.304	-0.057	-0.286	-0.489	-0.416
1582	434	-0.327	0.296	-0.099	-0.31	-0.499	-0.419
1583	434	-0.216	0.193	-0.174	-0.347	-0.511	-0.422
1584	434	0.938	-0.015	-0.277	-0.395	-0.524	-0.425
1585	434	0.866	-0.371	-0.404	-0.452	-0.538	-0.428
1586	434	-2.044	-0.799	-0.537	-0.513	-0.552	-0.43
1587	434	-2.123	-1.102	-0.654	-0.571	-0.565	-0.432
1588	434	-1.021	-1.205	-0.741	-0.624	-0.577	-0.434
1589	434	-1.112	-1.17	-0.798	-0.668	-0.586	-0.435
1590	434	-0.671	-1.061	-0.828	-0.704	-0.593	-0.435
1591	434	-0.705	-0.923	-0.836	-0.732	-0.596	-0.435
1592	434	-2.227	-0.753	-0.83	-0.751	-0.597	-0.434
1593	434	-0.003	-0.555	-0.814	-0.764	-0.595	-0.433
1594	434	0.974	-0.463	-0.802	-0.771	-0.591	-0.432
1595	434	-0.317	-0.557	-0.804	-0.775	-0.583	-0.43
1596	434	-1.225	-0.746	-0.813	-0.774	-0.573	-0.428
1597	434	-1.628	-0.89	-0.819	-0.766	-0.56	-0.425
1598	434	-1.266	-0.911	-0.813	-0.749	-0.544	-0.421
1599	434	-1.126	-0.83	-0.795	-0.724	-0.524	-0.418
1600	434	0.427	-0.731	-0.768	-0.69	-0.501	-0.413
1601	434	-0.714	-0.708	-0.738	-0.649	-0.476	-0.409
1602	434	-0.529	-0.743	-0.701	-0.6	-0.449	-0.404
1603	434	-1.074	-0.783	-0.652	-0.545	-0.42	-0.399
1604	434	-1.453	-0.76	-0.586	-0.482	-0.389	-0.394
1605	434	-0.585	-0.648	-0.502	-0.411	-0.357	-0.389
1606	434	0.167	-0.5	-0.405	-0.336	-0.324	-0.384
1607	434	-0.362	-0.363	-0.299	-0.259	-0.292	-0.378
1608	434	-0.782	-0.214	-0.188	-0.181	-0.26	-0.373
1609	434	-0.49	-0.024	-0.075	-0.104	-0.23	-0.368
1610	434	0.87	0.16	0.033	-0.033	-0.202	-0.363
1611	434	1.203	0.25	0.126	0.03	-0.178	-0.359
1612	434	-0.222	0.245	0.202	0.084	-0.157	-0.355
1613	434	-0.456	0.245	0.263	0.126	-0.141	-0.351
1614	434	-0.075	0.312	0.313	0.157	-0.128	-0.348
1615	434	0.904	0.412	0.348	0.176	-0.121	-0.345
1616	434	0.837	0.465	0.362	0.18	-0.118	-0.342
1617	434	0.529	0.442	0.35	0.169	-0.121	-0.341
1618	434	0.336	0.366	0.316	0.144	-0.128	-0.339
1619	434	0.18	0.281	0.261	0.105	-0.14	-0.338
1620	434	-0.524	0.225	0.191	0.055	-0.156	-0.338
1621	434	0.154	0.206	0.107	-0.005	-0.175	-0.338
1622	434	1.43	0.151	0.007	-0.074	-0.198	-0.338
1623	434	-0.307	-0.006	-0.111	-0.15	-0.224	-0.339
1624	434	-0.356	-0.205	-0.239	-0.23	-0.251	-0.34
1625	434	-0.908	-0.39	-0.368	-0.311	-0.279	-0.341
1626	434	0.12	-0.543	-0.492	-0.389	-0.308	-0.342
1627	434	-0.915	-0.683	-0.606	-0.462	-0.335	-0.343
1628	434	-1.412	-0.782	-0.703	-0.527	-0.361	-0.345
1629	434	-0.313	-0.835	-0.78	-0.581	-0.385	-0.346
1630	434	-0.804	-0.895	-0.836	-0.623	-0.406	-0.347
1631	434	-1.15	-0.974	-0.87	-0.653	-0.425	-0.347
1632	434	-0.588	-1.067	-0.878	-0.67	-0.44	-0.348
1633	434	-0.763	-1.17	-0.859	-0.673	-0.451	-0.348
1634	434	-1.11	-1.227	-0.811	-0.664	-0.459	-0.348
1635	434	-3.6	-1.121	-0.73	-0.641	-0.463	-0.348
1636	434	-0.234	-0.778	-0.619	-0.607	-0.464	-0.347
1637	434	0.6	-0.363	-0.499	-0.568	-0.462	-0.346
1638	434	0.164	-0.026	-0.393	-0.529	-0.459	-0.345
1639	434	-0.214	0.204	-0.314	-0.494	-0.454	-0.344
1640	434	0.266	0.331	-0.269	-0.466	-0.449	-0.342
1641	434	0.698	0.318	-0.264	-0.447	-0.443	-0.341
1642	434	0.879	0.121	-0.297	-0.436	-0.436	-0.339
1643	434	0.33	-0.245	-0.362	-0.433	-0.43	-0.337
1644	434	-1.246	-0.664	-0.438	-0.432	-0.423	-0.335
1645	434	-2.654	-0.955	-0.5	-0.429	-0.414	-0.332
1646	434	-0.543	-1.025	-0.532	-0.42	-0.404	-0.33
1647	434	-0.558	-0.964	-0.533	-0.404	-0.393	-0.327
1648	434	-1	-0.841	-0.504	-0.383	-0.38	-0.324
1649	434	-0.691	-0.677	-0.45	-0.355	-0.366	-0.321
1650	434	-0.303	-0.499	-0.375	-0.325	-0.351	-0.318
1651	434	-0.018	-0.335	-0.29	-0.293	-0.336	-0.314
1652	434	-0.52	-0.183	-0.204	-0.262	-0.321	-0.311
1653	434	-0.306	-0.013	-0.122	-0.234	-0.307	-0.307
1654	434	0.193	0.169	-0.055	-0.212	-0.293	-0.304
1655	434	0.622	0.322	-0.012	-0.197	-0.282	-0.3
1656	434	0.673	0.405	-0.001	-0.193	-0.271	-0.297
1657	434	-0.888	0.416	-0.026	-0.198	-0.263	-0.293
1658	434	1.602	0.357	-0.084	-0.211	-0.256	-0.29
1659	434	0.947	0.132	-0.175	-0.233	-0.251	-0.287
1660	434	-0.144	-0.24	-0.289	-0.259	-0.247	-0.283
1661	434	-1.731	-0.617	-0.403	-0.284	-0.243	-0.28
1662	434	-1.714	-0.857	-0.496	-0.302	-0.239	-0.277
1663	434	-0.12	-0.954	-0.556	-0.309	-0.234	-0.274
1664	434	-0.272	-0.996	-0.581	-0.306	-0.229	-0.271
1665	434	-1.935	-0.99	-0.567	-0.29	-0.222	-0.267
1666	434	-1.115	-0.869	-0.509	-0.262	-0.215	-0.264
1667	434	-0.627	-0.653	-0.414	-0.223	-0.207	-0.26
1668	434	0.17	-0.412	-0.292	-0.176	-0.199	-0.257
1669	434	0.17	-0.202	-0.157	-0.127	-0.191	-0.254
1670	434	-0.503	-0.011	-0.019	-0.079	-0.185	-0.251
1671	434	-0.431	0.215	0.115	-0.035	-0.181	-0.247
1672	434	0.333	0.473	0.231	0.001	-0.179	-0.245
1673	434	2.098	0.674	0.316	0.023	-0.18	-0.242
1674	434	0.362	0.737	0.356	0.028	-0.184	-0.239
1675	434	0.476	0.714	0.349	0.016	-0.192	-0.237
1676	434	-0.018	0.65	0.297	-0.014	-0.203	-0.235
1677	434	1.666	0.537	0.204	-0.06	-0.217	-0.233
1678	434	-0.005	0.323	0.071	-0.12	-0.234	-0.232
1679	434	-0.246	0.045	-0.09	-0.19	-0.252	-0.23
1680	434	0.966	-0.271	-0.266	-0.265	-0.27	-0.228
1681	434	-1.847	-0.606	-0.442	-0.341	-0.289	-0.227
1682	434	-1.264	-0.852	-0.599	-0.411	-0.306	-0.225
1683	434	-0.912	-1.007	-0.726	-0.471	-0.321	-0.223
1684	434	0.599	-1.145	-0.818	-0.518	-0.334	-0.221
1685	434	-2.643	-1.293	-0.871	-0.549	-0.343	-0.219
1686	434	-1.508	-1.33	-0.873	-0.563	-0.348	-0.216
1687	434	-1.477	-1.235	-0.826	-0.559	-0.348	-0.213
1688	434	-0.41	-1.046	-0.736	-0.538	-0.345	-0.21
1689	434	-0.737	-0.815	-0.617	-0.504	-0.339	-0.206
1690	434	-1.078	-0.532	-0.479	-0.462	-0.329	-0.203
1691	434	-0.4	-0.176	-0.336	-0.415	-0.317	-0.199
1692	434	0.399	0.211	-0.205	-0.367	-0.304	-0.195
1693	434	-0.661	0.558	-0.104	-0.325	-0.289	-0.191
1694	434	2.399	0.773	-0.046	-0.291	-0.274	-0.187
1695	434	1.663	0.687	-0.045	-0.27	-0.26	-0.183
1696	434	1.016	0.293	-0.097	-0.26	-0.245	-0.179
1697	434	-0.904	-0.256	-0.18	-0.257	-0.231	-0.176
1698	434	-1.647	-0.72	-0.264	-0.255	-0.216	-0.172
1699	434	-2.303	-0.934	-0.324	-0.249	-0.199	-0.168
1700	434	-0.513	-0.881	-0.348	-0.234	-0.181	-0.165
1701	434	-0.238	-0.699	-0.34	-0.213	-0.162	-0.161
1702	434	0.391	-0.514	-0.308	-0.185	-0.141	-0.158
1703	434	-0.26	-0.37	-0.258	-0.152	-0.12	-0.155
1704	434	-2.395	-0.202	-0.191	-0.115	-0.099	-0.152
1705	434	1.143	0.034	-0.112	-0.074	-0.077	-0.149
1706	434	1.493	0.183	-0.037	-0.035	-0.056	-0.147
1707	434	0.096	0.186	0.025	0.002	-0.037	-0.145
1708	434	-0.589	0.143	0.076	0.035	-0.019	-0.143
1709	434	-0.705	0.163	0.122	0.066	-0.003	-0.142
1710	434	0.534	0.251	0.161	0.093	0.012	-0.141
1711	434	1.39	0.312	0.186	0.115	0.024	-0.141
1712	434	-0.178	0.285	0.195	0.13	0.033	-0.142
1713	434	0.524	0.217	0.191	0.14	0.04	-0.143
1714	434	-0.196	0.143	0.179	0.145	0.044	-0.144
1715	434	-0.357	0.108	0.163	0.146	0.045	-0.147
1716	434	0.553	0.119	0.146	0.145	0.044	-0.149
1717	434	-0.017	0.136	0.127	0.14	0.04	-0.152
1718	434	0.104	0.149	0.108	0.132	0.034	-0.156
1719	434	-0.131	0.14	0.087	0.121	0.024	-0.161
1720	434	0.938	0.078	0.066	0.108	0.013	-0.166
1721	434	0.959	-0.077	0.043	0.092	-0.001	-0.171
1722	434	-1.502	-0.254	0.026	0.075	-0.018	-0.177
1723	434	-1.662	-0.285	0.026	0.059	-0.036	-0.183
1724	434	0.361	-0.141	0.043	0.043	-0.056	-0.19
1725	434	1.02	0.044	0.064	0.025	-0.077	-0.197
1726	434	-0.119	0.18	0.078	0.002	-0.101	-0.204
1727	434	0.149	0.282	0.08	-0.027	-0.127	-0.212
1728	434	-0.069	0.355	0.064	-0.063	-0.155	-0.22
1729	434	1.095	0.373	0.026	-0.107	-0.185	-0.228
1730	434	0.016	0.282	-0.04	-0.159	-0.216	-0.237
1731	434	0.971	0.082	-0.129	-0.219	-0.248	-0.246
1732	434	-0.73	-0.209	-0.235	-0.284	-0.281	-0.254
1733	434	-0.546	-0.504	-0.346	-0.351	-0.314	-0.263
1734	434	-0.392	-0.746	-0.449	-0.415	-0.346	-0.272
1735	434	-1.936	-0.888	-0.537	-0.475	-0.375	-0.28
1736	434	-1.207	-0.874	-0.6	-0.528	-0.403	-0.289
1737	434	-0.244	-0.757	-0.643	-0.573	-0.428	-0.296
1738	434	-0.917	-0.636	-0.674	-0.612	-0.45	-0.304
1739	434	1.011	-0.577	-0.7	-0.644	-0.47	-0.311
1740	434	-1.451	-0.615	-0.727	-0.671	-0.486	-0.318
1741	434	-1.105	-0.654	-0.75	-0.692	-0.499	-0.325
1742	434	-0.636	-0.653	-0.767	-0.705	-0.509	-0.331
1743	434	-0.646	-0.639	-0.781	-0.71	-0.515	-0.337
1744	434	-0.519	-0.65	-0.793	-0.709	-0.518	-0.342
1745	434	-0.206	-0.72	-0.801	-0.701	-0.518	-0.346
1746	434	-1.241	-0.857	-0.803	-0.684	-0.514	-0.35
1747	434	0.542	-1.021	-0.792	-0.659	-0.507	-0.354
1748	434	-2.667	-1.16	-0.76	-0.625	-0.497	-0.357
1749	434	-2.389	-1.106	-0.695	-0.58	-0.484	-0.36
1750	434	-0.344	-0.842	-0.599	-0.525	-0.469	-0.362
1751	434	-0.053	-0.51	-0.485	-0.464	-0.451	-0.364
1752	434	-0.043	-0.223	-0.369	-0.403	-0.433	-0.365
1753	434	0.107	-0.028	-0.262	-0.344	-0.415	-0.366
1754	434	0.502	0.063	-0.171	-0.291	-0.397	-0.367
1755	434	-0.312	0.067	-0.101	-0.245	-0.38	-0.368
1756	434	0.78	0.04	-0.05	-0.208	-0.365	-0.369
1757	434	-2	0.031	-0.017	-0.18	-0.352	-0.369
1758	434	0.913	0.1	0.003	-0.161	-0.341	-0.369
1759	434	0.364	0.14	0.002	-0.152	-0.332	-0.37
1760	434	1.404	0.079	-0.021	-0.154	-0.325	-0.37
1761	434	-0.79	-0.076	-0.065	-0.165	-0.321	-0.37
1762	434	-1.621	-0.191	-0.116	-0.183	-0.319	-0.37
1763	434	0.832	-0.212	-0.169	-0.206	-0.319	-0.37
1764	434	-0.403	-0.224	-0.225	-0.232	-0.321	-0.37
1765	434	-0.369	-0.244	-0.284	-0.261	-0.323	-0.369
1766	434	0.171	-0.284	-0.342	-0.29	-0.327	-0.369
1767	434	-1.077	-0.363	-0.4	-0.32	-0.332	-0.368
1768	434	0.927	-0.474	-0.452	-0.347	-0.337	-0.368
1769	434	-1.329	-0.636	-0.497	-0.371	-0.342	-0.367
1770	434	-1.211	-0.759	-0.525	-0.39	-0.347	-0.366
1771	434	-0.252	-0.799	-0.531	-0.402	-0.352	-0.365
1772	434	-1.058	-0.766	-0.517	-0.406	-0.355	-0.363
1773	434	-1.618	-0.629	-0.483	-0.404	-0.358	-0.362
1774	434	0.281	-0.401	-0.435	-0.398	-0.361	-0.36
1775	434	-0.342	-0.186	-0.386	-0.389	-0.363	-0.358
1776	434	0.204	-0.05	-0.345	-0.38	-0.365	-0.355
1777	434	1.273	-0.047	-0.32	-0.374	-0.367	-0.353
1778	434	-0.916	-0.178	-0.313	-0.372	-0.369	-0.35
1779	434	-0.843	-0.316	-0.315	-0.371	-0.371	-0.348
1780	434	-0.78	-0.393	-0.319	-0.372	-0.374	-0.345
1781	434	0.247	-0.423	-0.323	-0.374	-0.375	-0.341
1782	434	-0.165	-0.458	-0.329	-0.376	-0.377	-0.338
1783	434	-0.628	-0.482	-0.335	-0.38	-0.378	-0.335
1784	434	-1.385	-0.433	-0.337	-0.384	-0.379	-0.331
1785	434	-0.298	-0.286	-0.337	-0.388	-0.379	-0.327
1786	434	-0.26	-0.115	-0.34	-0.393	-0.378	-0.323
1787	434	0.732	-0.025	-0.355	-0.401	-0.377	-0.319
1788	434	1.171	-0.116	-0.389	-0.411	-0.376	-0.314
1789	434	-0.668	-0.381	-0.438	-0.424	-0.374	-0.31
1790	434	-1.094	-0.667	-0.487	-0.435	-0.372	-0.305
1791	434	-2.348	-0.827	-0.521	-0.441	-0.367	-0.3
1792	434	-0.128	-0.806	-0.531	-0.44	-0.361	-0.295
1793	434	-0.617	-0.7	-0.523	-0.432	-0.353	-0.29
1794	434	-0.195	-0.575	-0.502	-0.418	-0.344	-0.284
1795	434	-1.051	-0.456	-0.47	-0.399	-0.333	-0.278
1796	434	0.211	-0.346	-0.433	-0.376	-0.322	-0.272
1797	434	0.073	-0.282	-0.395	-0.351	-0.309	-0.266
1798	434	-0.902	-0.253	-0.359	-0.324	-0.295	-0.26
1799	434	-0.322	-0.21	-0.322	-0.294	-0.281	-0.254
1800	434	-0.176	-0.168	-0.286	-0.264	-0.267	-0.248
1801	434	0.263	-0.169	-0.253	-0.235	-0.252	-0.242
1802	434	0.449	-0.247	-0.223	-0.206	-0.238	-0.236
1803	434	-0.997	-0.374	-0.192	-0.177	-0.224	-0.23
1804	434	-0.097	-0.457	-0.151	-0.149	-0.21	-0.224
1805	434	-1.172	-0.436	-0.097	-0.121	-0.196	-0.219
1806	434	-1.606	-0.251	-0.029	-0.093	-0.183	-0.213
1807	434	0.905	0.054	0.046	-0.067	-0.171	-0.208
1808	434	1.422	0.3	0.11	-0.049	-0.16	-0.203
1809	434	0.77	0.39	0.147	-0.04	-0.151	-0.198
1810	434	-0.186	0.373	0.157	-0.042	-0.144	-0.193
1811	434	-0.501	0.356	0.142	-0.054	-0.138	-0.189
1812	434	0.69	0.371	0.103	-0.075	-0.135	-0.185
1813	434	0.193	0.36	0.036	-0.104	-0.132	-0.181
1814	434	1.126	0.266	-0.058	-0.14	-0.131	-0.178
1815	434	0.064	0.049	-0.175	-0.181	-0.131	-0.175
1816	434	-0.482	-0.246	-0.302	-0.223	-0.131	-0.172
1817	434	-0.263	-0.558	-0.426	-0.26	-0.13	-0.17
1818	434	-1.121	-0.841	-0.53	-0.288	-0.128	-0.167
1819	434	-1.131	-1.031	-0.6	-0.304	-0.124	-0.165
1820	434	-1.634	-1.09	-0.625	-0.303	-0.118	-0.163
1821	434	-0.834	-1.01	-0.602	-0.285	-0.109	-0.161
1822	434	-0.983	-0.839	-0.534	-0.25	-0.099	-0.16
1823	434	-0.545	-0.624	-0.428	-0.202	-0.087	-0.158
1824	434	0.798	-0.419	-0.296	-0.144	-0.073	-0.157
1825	434	-1.117	-0.244	-0.147	-0.08	-0.06	-0.156
1826	434	-0.886	-0.012	0.012	-0.012	-0.047	-0.156
1827	434	0.957	0.283	0.172	0.054	-0.035	-0.155
1828	434	1.048	0.549	0.313	0.112	-0.025	-0.156
1829	434	-0.145	0.756	0.424	0.159	-0.018	-0.157
1830	434	1.419	0.92	0.497	0.192	-0.015	-0.158
1831	434	1.147	0.988	0.524	0.206	-0.016	-0.16
1832	434	0.347	0.94	0.502	0.202	-0.02	-0.162
1833	434	2.064	0.771	0.435	0.18	-0.029	-0.165
1834	434	0.76	0.451	0.328	0.141	-0.042	-0.169
1835	434	-0.896	0.079	0.197	0.091	-0.057	-0.173
1836	434	-0.691	-0.209	0.064	0.034	-0.076	-0.177
1837	434	0.02	-0.38	-0.061	-0.025	-0.095	-0.182
1838	434	-1.011	-0.467	-0.169	-0.084	-0.116	-0.187
1839	434	0.082	-0.489	-0.259	-0.14	-0.137	-0.192
1840	434	-0.497	-0.495	-0.329	-0.191	-0.159	-0.198
1841	434	-0.883	-0.49	-0.38	-0.237	-0.18	-0.203
1842	434	0.507	-0.473	-0.415	-0.277	-0.2	-0.209
1843	434	-1.71	-0.459	-0.436	-0.31	-0.219	-0.215
1844	434	0.311	-0.406	-0.443	-0.337	-0.238	-0.22
1845	434	-0.782	-0.354	-0.444	-0.357	-0.255	-0.226
1846	434	0.143	-0.316	-0.441	-0.373	-0.271	-0.231
1847	434	-0.332	-0.316	-0.439	-0.385	-0.286	-0.237
1848	434	-0.149	-0.343	-0.437	-0.393	-0.3	-0.242
1849	434	-1.395	-0.372	-0.435	-0.397	-0.313	-0.248
1850	434	-0.085	-0.382	-0.429	-0.398	-0.324	-0.253
1851	434	1.348	-0.449	-0.423	-0.395	-0.334	-0.258
1852	434	-1.68	-0.594	-0.416	-0.391	-0.343	-0.262
1853	434	-1.085	-0.675	-0.398	-0.383	-0.351	-0.267
1854	434	-1.117	-0.625	-0.365	-0.372	-0.357	-0.271
1855	434	0.164	-0.462	-0.319	-0.358	-0.362	-0.275
1856	434	-1.259	-0.248	-0.271	-0.344	-0.367	-0.279
1857	434	1.09	-0.021	-0.228	-0.333	-0.371	-0.282
1858	434	-0.302	0.122	-0.202	-0.327	-0.375	-0.286
1859	434	0.422	0.163	-0.199	-0.328	-0.379	-0.289
1860	434	0.787	0.076	-0.221	-0.336	-0.384	-0.292
1861	434	-0.418	-0.134	-0.266	-0.35	-0.389	-0.295
1862	434	-0.05	-0.385	-0.324	-0.369	-0.393	-0.297
1863	434	-0.914	-0.6	-0.382	-0.389	-0.398	-0.299
1864	434	-2.243	-0.681	-0.43	-0.407	-0.401	-0.301
1865	434	-0.43	-0.595	-0.462	-0.422	-0.403	-0.303
1866	434	0.472	-0.477	-0.484	-0.434	-0.403	-0.304
1867	434	0.595	-0.458	-0.504	-0.444	-0.403	-0.305
1868	434	-1.575	-0.54	-0.521	-0.452	-0.401	-0.305
1869	434	-0.248	-0.618	-0.53	-0.455	-0.399	-0.306
1870	434	-1.178	-0.657	-0.527	-0.454	-0.394	-0.306
1871	434	-0.586	-0.626	-0.51	-0.448	-0.388	-0.305
1872	434	-0.641	-0.533	-0.482	-0.437	-0.381	-0.304
1873	434	-0.958	-0.403	-0.447	-0.422	-0.372	-0.303
1874	434	0.782	-0.282	-0.411	-0.405	-0.363	-0.302
1875	434	-0.089	-0.251	-0.381	-0.388	-0.352	-0.301
1876	434	-0.269	-0.289	-0.359	-0.371	-0.342	-0.299
1877	434	-1.021	-0.332	-0.34	-0.353	-0.33	-0.297
1878	434	-0.148	-0.326	-0.32	-0.335	-0.318	-0.295
1879	434	-0.654	-0.284	-0.301	-0.316	-0.306	-0.293
1880	434	0.033	-0.227	-0.283	-0.297	-0.294	-0.29
1881	434	0.098	-0.204	-0.268	-0.278	-0.282	-0.288
1882	434	-0.335	-0.239	-0.258	-0.261	-0.27	-0.285
1883	434	0.369	-0.319	-0.248	-0.244	-0.258	-0.282
1884	434	-0.985	-0.417	-0.237	-0.227	-0.246	-0.28
1885	434	-0.676	-0.45	-0.217	-0.209	-0.235	-0.277
1886	434	-0.215	-0.384	-0.187	-0.19	-0.224	-0.274
1887	434	-1.258	-0.217	-0.151	-0.171	-0.214	-0.272
1888	434	-0.085	0.036	-0.112	-0.153	-0.204	-0.269
1889	434	1.572	0.254	-0.085	-0.138	-0.196	-0.266
1890	434	0.446	0.311	-0.08	-0.128	-0.189	-0.264
1891	434	-0.011	0.218	-0.097	-0.125	-0.183	-0.262
1892	434	0.414	0.027	-0.13	-0.126	-0.18	-0.26
1893	434	-0.157	-0.218	-0.17	-0.13	-0.177	-0.257
1894	434	-0.826	-0.437	-0.205	-0.134	-0.176	-0.256
1895	434	-1.749	-0.548	-0.222	-0.135	-0.175	-0.254
1896	434	-0.232	-0.533	-0.216	-0.132	-0.174	-0.252
1897	434	1.31	-0.505	-0.191	-0.127	-0.174	-0.25
1898	434	-0.506	-0.529	-0.154	-0.121	-0.175	-0.249
1899	434	-2.067	-0.473	-0.1	-0.114	-0.176	-0.247
1900	434	-1.185	-0.197	-0.028	-0.106	-0.178	-0.246
1901	434	-0.015	0.249	0.047	-0.1	-0.181	-0.245
1902	434	2.354	0.664	0.101	-0.102	-0.185	-0.244
1903	434	1.506	0.838	0.108	-0.116	-0.191	-0.243
1904	434	0.753	0.745	0.063	-0.145	-0.2	-0.242
1905	434	-0.314	0.475	-0.028	-0.185	-0.21	-0.242
1906	434	0.768	0.115	-0.151	-0.233	-0.221	-0.241
1907	434	-0.008	-0.312	-0.294	-0.284	-0.233	-0.241
1908	434	-1.658	-0.73	-0.435	-0.334	-0.244	-0.241
1909	434	-0.908	-1.037	-0.554	-0.377	-0.253	-0.24
1910	434	-0.797	-1.215	-0.638	-0.408	-0.26	-0.24
1911	434	-2.655	-1.248	-0.677	-0.426	-0.265	-0.239
1912	434	-0.174	-1.11	-0.669	-0.428	-0.267	-0.238
1913	434	-0.951	-0.882	-0.621	-0.416	-0.266	-0.237
1914	434	-1.637	-0.592	-0.543	-0.392	-0.263	-0.236
1915	434	0.605	-0.274	-0.446	-0.36	-0.257	-0.234
1916	434	0.678	-0.049	-0.349	-0.324	-0.251	-0.233
1917	434	0.023	0.042	-0.263	-0.288	-0.244	-0.231
1918	434	-0.598	0.057	-0.191	-0.252	-0.237	-0.23
1919	434	-0.094	0.056	-0.132	-0.22	-0.229	-0.228
1920	434	0.72	0.024	-0.088	-0.191	-0.222	-0.226
1921	434	0.235	-0.067	-0.06	-0.167	-0.215	-0.225
1922	434	-0.582	-0.17	-0.042	-0.148	-0.209	-0.223
1923	434	-1.137	-0.198	-0.028	-0.132	-0.204	-0.221
1924	434	0.612	-0.124	-0.016	-0.121	-0.199	-0.219
1925	434	-0.272	-0.009	-0.009	-0.114	-0.196	-0.218
1926	434	-0.527	0.129	-0.01	-0.112	-0.193	-0.216
1927	434	0.728	0.249	-0.025	-0.116	-0.192	-0.214
1928	434	1.179	0.246	-0.059	-0.126	-0.192	-0.213
1929	434	0.325	0.073	-0.113	-0.143	-0.193	-0.211
1930	434	-0.408	-0.201	-0.179	-0.164	-0.195	-0.209
1931	434	-0.813	-0.462	-0.242	-0.184	-0.198	-0.207
1932	434	-0.669	-0.622	-0.291	-0.201	-0.2	-0.205
1933	434	-1.926	-0.635	-0.318	-0.214	-0.203	-0.203
1934	434	0.203	-0.5	-0.322	-0.22	-0.205	-0.201
1935	434	0.436	-0.337	-0.312	-0.221	-0.206	-0.198
1936	434	-1.402	-0.204	-0.295	-0.22	-0.208	-0.196
1937	434	0.474	-0.093	-0.274	-0.215	-0.209	-0.193
1938	434	1.076	-0.084	-0.256	-0.21	-0.211	-0.19
1939	434	-0.568	-0.2	-0.245	-0.205	-0.212	-0.187
1940	434	-0.343	-0.339	-0.233	-0.198	-0.214	-0.184
1941	434	-1.419	-0.406	-0.213	-0.19	-0.216	-0.181
1942	434	-0.236	-0.343	-0.183	-0.18	-0.217	-0.178
1943	434	0.099	-0.194	-0.147	-0.169	-0.219	-0.174
1944	434	-1.117	-0.012	-0.11	-0.159	-0.22	-0.17
1945	434	1.394	0.156	-0.081	-0.153	-0.223	-0.166
1946	434	0.324	0.187	-0.069	-0.152	-0.226	-0.162
1947	434	1.352	0.062	-0.077	-0.158	-0.229	-0.158
1948	434	-1.031	-0.159	-0.097	-0.169	-0.233	-0.153
1949	434	-1.894	-0.3	-0.118	-0.183	-0.237	-0.148
1950	434	-0.215	-0.284	-0.132	-0.197	-0.241	-0.144
1951	434	1.319	-0.22	-0.143	-0.214	-0.244	-0.139
1952	434	-0.445	-0.212	-0.161	-0.234	-0.246	-0.133
1953	434	-1.001	-0.208	-0.182	-0.256	-0.248	-0.128
1954	434	0.308	-0.161	-0.205	-0.279	-0.249	-0.122
1955	434	-0.951	-0.099	-0.235	-0.304	-0.249	-0.116
1956	434	0.762	-0.044	-0.274	-0.329	-0.248	-0.11
1957	434	0.183	-0.076	-0.328	-0.355	-0.245	-0.103
1958	434	0.665	-0.204	-0.395	-0.38	-0.24	-0.097
1959	434	-2.452	-0.368	-0.467	-0.402	-0.232	-0.09
1960	434	-0.179	-0.464	-0.531	-0.417	-0.222	-0.082
1961	434	0.882	-0.575	-0.587	-0.423	-0.209	-0.075
1962	434	-0.947	-0.772	-0.63	-0.419	-0.192	-0.067
1963	434	-1.377	-0.97	-0.647	-0.402	-0.172	-0.059
1964	434	-1.053	-1.076	-0.627	-0.369	-0.148	-0.051
1965	434	-1.687	-1.041	-0.564	-0.319	-0.12	-0.043
1966	434	-1.234	-0.844	-0.456	-0.254	-0.089	-0.034
1967	434	0.254	-0.539	-0.314	-0.176	-0.055	-0.026
1968	434	-0.398	-0.216	-0.151	-0.09	-0.02	-0.018
1969	434	0.433	0.1	0.019	0	0.016	-0.009
1970	434	0.203	0.396	0.183	0.089	0.052	-0.001
1971	434	-0.503	0.686	0.332	0.173	0.087	0.007
1972	434	2.233	0.937	0.453	0.248	0.12	0.014
1973	434	1.207	1.025	0.534	0.311	0.151	0.021
1974	434	1.525	0.934	0.572	0.358	0.177	0.027
1975	434	0.13	0.714	0.574	0.391	0.2	0.033
1976	434	0.902	0.467	0.553	0.412	0.22	0.038
1977	434	-0.668	0.262	0.52	0.424	0.236	0.042
1978	434	0.117	0.173	0.489	0.429	0.249	0.046
1979	434	0.454	0.186	0.463	0.428	0.258	0.049
1980	434	-0.198	0.266	0.443	0.423	0.265	0.052
1981	434	0.841	0.393	0.426	0.413	0.268	0.054
1982	434	0.2	0.514	0.406	0.398	0.269	0.055
1983	434	0.256	0.605	0.381	0.378	0.266	0.055
1984	434	2.012	0.612	0.345	0.353	0.26	0.055
1985	434	0.047	0.472	0.294	0.323	0.251	0.054
1986	434	0.969	0.247	0.237	0.29	0.24	0.052
1987	434	-0.937	0.012	0.18	0.257	0.227	0.05
1988	434	-0.835	-0.12	0.138	0.225	0.212	0.047
1989	434	0.409	-0.136	0.113	0.198	0.196	0.044
1990	434	0.538	-0.105	0.101	0.174	0.18	0.04
1991	434	-1.101	-0.043	0.102	0.152	0.162	0.035
1992	434	0.28	0.088	0.112	0.134	0.144	0.031
1993	434	0.102	0.238	0.125	0.116	0.126	0.025
1994	434	1.577	0.346	0.131	0.097	0.106	0.02
1995	434	-1.389	0.373	0.124	0.075	0.086	0.014
1996	434	1.719	0.361	0.105	0.052	0.065	0.008
1997	434	0.545	0.234	0.068	0.024	0.044	0.001
1998	434	0.349	0.02	0.019	-0.005	0.023	-0.006
1999	434	-2.023	-0.177	-0.032	-0.034	0.001	-0.013
2000	434	1.103	-0.258	-0.074	-0.061	-0.019	-0.02
2001	434	-1.38	-0.272	-0.108	-0.086	-0.039	-0.027
2002	434	-0.172	-0.204	-0.131	-0.107	-0.057	-0.035
2003	434	0.244	-0.118	-0.149	-0.126	-0.074	-0.042
2004	434	0.708	-0.093	-0.165	-0.143	-0.09	-0.049
2005	434	-0.532	-0.15	-0.183	-0.159	-0.105	-0.057

## Sheet: B_varves_locfit
YearCE	PRGL_index	LocfitVarves
1026	-0.336	-0.552261
1027	0.0456	-0.546674
1028	0.297	-0.54114
1029	0.039	-0.535661
1030	-0.569	-0.530238
1031	-1.13	-0.524871
1032	-0.626	-0.519562
1033	-0.314	-0.514313
1034	0.0276	-0.509123
1035	-0.511	-0.503995
1036	-0.999	-0.49893
1037	-1.05	-0.493927
1038	-0.155	-0.48899
1039	-0.394	-0.484119
1040	-0.742	-0.479314
1041	-1.15	-0.474578
1042	-1.25	-0.469911
1043	-1.07	-0.465315
1044	-0.435	-0.46079
1045	-0.373	-0.456338
1046	-0.662	-0.45196
1047	-0.33	-0.447656
1048	-0.568	-0.443429
1049	-0.297	-0.43928
1050	0.0951	-0.435208
1051	-0.463	-0.431217
1052	-0.231	-0.427306
1053	-0.52	-0.423477
1054	-0.638	-0.41973
1055	-0.996	-0.416068
1056	0.00544	-0.412492
1057	0.577	-0.409001
1058	-0.361	-0.405599
1059	-0.549	-0.402285
1060	-0.648	-0.399061
1061	-0.806	-0.395927
1062	-0.374	-0.392886
1063	-0.263	-0.389939
1064	-0.0608	-0.387085
1065	-0.00909	-0.384327
1066	-0.667	-0.381666
1067	-0.826	-0.379103
1068	-0.704	-0.376639
1069	-0.662	-0.374275
1070	-0.541	-0.372012
1071	0.471	-0.369851
1072	-0.0671	-0.367794
1073	0.195	-0.365842
1074	-0.204	-0.363995
1075	-0.812	-0.362256
1076	-0.61	-0.360624
1077	0.152	-0.359102
1078	0.593	-0.35769
1079	0.695	-0.35639
1080	0.337	-0.355202
1081	-0.0116	-0.354128
1082	-0.53	-0.353169
1083	-0.858	-0.352326
1084	-0.446	-0.351601
1085	0.215	-0.350993
1086	1.37	-0.350505
1087	0.569	-0.350138
1088	0.1	-0.349816
1089	-0.568	-0.34948
1090	-0.786	-0.349129
1091	-0.444	-0.348762
1092	-0.113	-0.348379
1093	-0.551	-0.347979
1094	-0.349	-0.347561
1095	0.0224	-0.347125
1096	0.0641	-0.34667
1097	0.216	-0.346196
1098	-0.562	-0.345702
1099	-0.621	-0.345187
1100	-0.839	-0.344651
1101	-0.607	-0.344092
1102	0.0343	-0.343511
1103	1.24	-0.342907
1104	0.378	-0.342278
1105	-0.651	-0.341626
1106	-0.0588	-0.340948
1107	-0.317	-0.340244
1108	0.405	-0.339513
1109	-0.144	-0.338756
1110	-0.592	-0.33797
1111	-0.0503	-0.337157
1112	-0.0586	-0.336314
1113	-0.907	-0.335441
1114	-0.475	-0.334539
1115	-0.373	-0.333605
1116	-0.572	-0.33264
1117	-0.22	-0.331642
1118	-0.268	-0.330612
1119	-0.577	-0.329548
1120	-0.665	-0.32845
1121	-0.803	-0.327317
1122	-0.492	-0.326149
1123	-0.5	-0.324945
1124	-0.678	-0.323704
1125	-0.996	-0.322426
1126	-1.06	-0.321109
1127	0.167	-0.319755
1128	0.329	-0.31836
1129	0.6	-0.316927
1130	0.032	-0.315452
1131	-0.506	-0.313936
1132	-0.625	-0.312379
1133	-0.363	-0.310779
1134	-0.201	-0.309136
1135	-1.07	-0.307449
1136	-0.478	-0.305719
1137	-0.236	-0.303943
1138	-0.555	-0.302121
1139	0.117	-0.300253
1140	0.139	-0.298338
1141	0.221	-0.296376
1142	-0.478	-0.294366
1143	-0.186	-0.292306
1144	-0.814	-0.290198
1145	-0.663	-0.288039
1146	-0.391	-0.285829
1147	0.0306	-0.283568
1148	-0.518	-0.281256
1149	-0.106	-0.278914
1150	-0.364	-0.276559
1151	-0.713	-0.274189
1152	-1.29	-0.271807
1153	-0.519	-0.269412
1154	-0.838	-0.267005
1155	-0.846	-0.264587
1156	-0.524	-0.262157
1157	-0.793	-0.259717
1158	-0.531	-0.257266
1159	-0.649	-0.254806
1160	-0.808	-0.252336
1161	-0.566	-0.249858
1162	-0.464	-0.247372
1163	-0.223	-0.244878
1164	-0.101	-0.242376
1165	-0.16	-0.239868
1166	-0.288	-0.237353
1167	-0.586	-0.234833
1168	-0.315	-0.232307
1169	-0.273	-0.229776
1170	-0.621	-0.227241
1171	-0.52	-0.224703
1172	-0.648	-0.22216
1173	-0.306	-0.219615
1174	-0.345	-0.217067
1175	-0.333	-0.214518
1176	-0.441	-0.211966
1177	-0.17	-0.209414
1178	0.802	-0.206862
1179	-0.0866	-0.204309
1180	-0.715	-0.201757
1181	-0.383	-0.199205
1182	-0.202	-0.196655
1183	0.57	-0.194108
1184	-0.529	-0.191562
1185	0.0231	-0.189019
1186	-0.0853	-0.18648
1187	0.0263	-0.183944
1188	-0.132	-0.181413
1189	-0.231	-0.178887
1190	-0.359	-0.176365
1191	-0.287	-0.17385
1192	0.454	-0.171341
1193	0.166	-0.168839
1194	0.667	-0.166343
1195	0.479	-0.163856
1196	0.261	-0.161377
1197	0.0822	-0.158906
1198	-0.116	-0.156445
1199	-0.0946	-0.153993
1200	0.067	-0.151551
1201	0.329	-0.14912
1202	0.76	-0.1467
1203	0.262	-0.144292
1204	0.343	-0.141895
1205	0.435	-0.139511
1206	0.186	-0.13714
1207	0.0779	-0.134783
1208	0.149	-0.13244
1209	0.241	-0.130113
1210	-0.577	-0.127877
1211	-0.0659	-0.125767
1212	0.436	-0.123783
1213	1.5	-0.121923
1214	0.279	-0.120184
1215	-0.12	-0.118565
1216	-0.698	-0.117065
1217	-0.577	-0.115681
1218	-0.0452	-0.114411
1219	0.516	-0.113256
1220	1.26	-0.112211
1221	0.119	-0.111276
1222	-0.309	-0.110449
1223	-0.308	-0.109728
1224	-0.466	-0.109112
1225	-0.605	-0.108599
1226	-0.593	-0.108187
1227	-0.562	-0.107874
1228	-0.29	-0.107658
1229	-0.469	-0.107539
1230	-0.0473	-0.107514
1231	0.00421	-0.107581
1232	-0.00432	-0.107739
1233	-0.333	-0.107986
1234	0.239	-0.108321
1235	0.0401	-0.10874
1236	0.112	-0.109244
1237	0.653	-0.10983
1238	0.0344	-0.110496
1239	0.876	-0.111242
1240	0.677	-0.112064
1241	0.439	-0.112961
1242	-0.0699	-0.113932
1243	-0.168	-0.114974
1244	-0.277	-0.116087
1245	0.0344	-0.117268
1246	-0.134	-0.118516
1247	-0.123	-0.119828
1248	-0.0714	-0.121204
1249	-0.04	-0.122641
1250	-0.629	-0.124138
1251	-0.727	-0.125693
1252	-0.406	-0.127305
1253	-0.184	-0.128971
1254	-0.393	-0.13069
1255	-0.882	-0.13246
1256	-0.5	-0.134279
1257	0.541	-0.136146
1258	-0.278	-0.138059
1259	0.244	-0.140017
1260	0.845	-0.142017
1261	0.176	-0.144057
1262	-0.502	-0.146137
1263	-0.991	-0.148254
1264	-0.85	-0.150407
1265	-0.968	-0.152594
1266	-0.137	-0.154813
1267	0.134	-0.157062
1268	0.426	-0.159341
1269	-0.0631	-0.161646
1270	0.458	-0.163971
1271	0.319	-0.166206
1272	-0.0292	-0.168304
1273	0.452	-0.170265
1274	-0.387	-0.17209
1275	-0.805	-0.173778
1276	-0.694	-0.175329
1277	-0.663	-0.176743
1278	-0.502	-0.17802
1279	0.77	-0.17916
1280	-0.279	-0.180164
1281	-0.638	-0.181029
1282	-1.09	-0.181758
1283	-0.426	-0.182349
1284	0.876	-0.182803
1285	0.467	-0.18312
1286	-0.182	-0.183299
1287	0.169	-0.18334
1288	0.1	-0.183243
1289	-0.388	-0.183009
1290	-0.347	-0.182637
1291	-0.416	-0.182127
1292	-0.545	-0.181479
1293	-0.124	-0.180693
1294	-0.303	-0.179768
1295	-0.402	-0.178706
1296	-0.59	-0.177505
1297	-0.419	-0.176166
1298	0.142	-0.174688
1299	-0.677	-0.173072
1300	-0.766	-0.171317
1301	-0.535	-0.169423
1302	-0.624	-0.167391
1303	-1	-0.16522
1304	-0.592	-0.16291
1305	-0.601	-0.16046
1306	-0.539	-0.157872
1307	-0.168	-0.155145
1308	-0.427	-0.152278
1309	-0.0763	-0.149273
1310	-0.0653	-0.146127
1311	0.226	-0.142843
1312	0.197	-0.139419
1313	-0.312	-0.135855
1314	-0.461	-0.132151
1315	-0.77	-0.128308
1316	-0.909	-0.124325
1317	-0.618	-0.120202
1318	-0.537	-0.115939
1319	0.154	-0.111536
1320	0.185	-0.106993
1321	0.286	-0.10231
1322	0.646	-0.0974865
1323	0.977	-0.0925226
1324	-0.162	-0.0874183
1325	-0.571	-0.0821735
1326	-0.21	-0.0767882
1327	0.091	-0.0712621
1328	-0.0281	-0.0655954
1329	-0.507	-0.0597878
1330	-0.886	-0.0538394
1331	-0.0555	-0.0477558
1332	0.715	-0.041623
1333	-0.0538	-0.0354711
1334	-0.223	-0.0293018
1335	0.358	-0.0231173
1336	0.0787	-0.0169194
1337	-0.171	-0.0107101
1338	-0.23	-0.00449124
1339	-0.269	0.00173512
1340	-0.298	0.00796708
1341	0.0226	0.0142027
1342	-0.547	0.02044
1343	0.164	0.0266771
1344	1.29	0.032912
1345	0.756	0.0391429
1346	-0.284	0.0453676
1347	-0.713	0.0515844
1348	-0.762	0.0577912
1349	-0.581	0.0639861
1350	-0.131	0.0701672
1351	0.0999	0.0763325
1352	-0.189	0.0824801
1353	-0.309	0.088608
1354	0.342	0.0947143
1355	0.593	0.100797
1356	0.333	0.106854
1357	0.194	0.112884
1358	0.154	0.118885
1359	-0.235	0.124854
1360	0.366	0.13079
1361	0.826	0.136691
1362	0.807	0.142554
1363	0.697	0.148379
1364	0.418	0.154162
1365	0.118	0.159903
1366	0.299	0.165598
1367	0.659	0.171247
1368	0.37	0.176847
1369	-0.11	0.182396
1370	0.031	0.187892
1371	0.281	0.193334
1372	0.142	0.198719
1373	-0.228	0.204046
1374	-0.267	0.209312
1375	0.0433	0.214516
1376	0.434	0.219656
1377	-0.286	0.224729
1378	-0.255	0.229734
1379	-0.395	0.234669
1380	0.275	0.239532
1381	1.06	0.24432
1382	0.0361	0.249033
1383	0.266	0.253668
1384	0.627	0.258223
1385	0.437	0.262696
1386	0.917	0.267085
1387	1.01	0.271388
1388	0.268	0.275604
1389	0.368	0.27973
1390	0.319	0.283765
1391	0.179	0.287706
1392	0.659	0.291555
1393	0.419	0.29534
1394	0.0797	0.29907
1395	0.52	0.302743
1396	0.87	0.306359
1397	0.5	0.309919
1398	0.961	0.313421
1399	0.111	0.316865
1400	-0.0392	0.32025
1401	0.611	0.323578
1402	0.931	0.326846
1403	0.961	0.330054
1404	1.43	0.333203
1405	0.0915	0.336291
1406	0.0616	0.339319
1407	-0.158	0.342286
1408	0.922	0.345191
1409	1.3	0.348034
1410	1.31	0.350815
1411	0.772	0.353534
1412	0.352	0.356189
1413	0.432	0.358781
1414	-0.328	0.361309
1415	-0.418	0.363773
1416	-0.248	0.366171
1417	0.102	0.368505
1418	0.522	0.370774
1419	1.19	0.372976
1420	0.982	0.375112
1421	0.302	0.377182
1422	-0.138	0.379184
1423	0.0914	0.381119
1424	0.0513	0.382986
1425	0.491	0.384785
1426	1.02	0.386515
1427	0.661	0.388176
1428	0.931	0.389767
1429	1.21	0.391289
1430	0.91	0.39274
1431	0.24	0.39412
1432	0.26	0.39543
1433	0.85	0.396668
1434	0.369	0.397834
1435	0.759	0.398927
1436	0.879	0.399948
1437	0.609	0.400896
1438	0.778	0.40177
1439	0.968	0.402571
1440	0.688	0.403297
1441	0.237	0.403948
1442	0.377	0.404524
1443	0.797	0.405025
1444	-0.264	0.40545
1445	-0.534	0.405798
1446	-0.805	0.40607
1447	-0.525	0.406264
1448	-0.415	0.406381
1449	-0.106	0.40642
1450	0.104	0.406381
1451	-0.167	0.406263
1452	-0.0573	0.406066
1453	-0.308	0.405783
1454	-0.908	0.405365
1455	-0.529	0.404801
1456	-0.109	0.404092
1457	0.25	0.403239
1458	0.3	0.402241
1459	1.76	0.401099
1460	1.32	0.399814
1461	0.328	0.398386
1462	0.717	0.396815
1463	1.01	0.395102
1464	0.0859	0.393247
1465	0.0253	0.39125
1466	0.615	0.389112
1467	0.194	0.386834
1468	-0.567	0.384415
1469	-0.647	0.381856
1470	-0.0982	0.379157
1471	0.791	0.376319
1472	0.1	0.373342
1473	0.12	0.370227
1474	0.0088	0.366973
1475	1.2	0.363582
1476	0.537	0.360054
1477	0.376	0.356388
1478	0.206	0.352586
1479	0.435	0.348648
1480	0.704	0.344574
1481	0.933	0.340365
1482	0.782	0.336021
1483	1.21	0.331542
1484	0.75	0.326929
1485	0.259	0.322182
1486	0.568	0.317301
1487	0.667	0.312288
1488	0.207	0.307142
1489	0.666	0.301863
1490	0.785	0.296453
1491	0.894	0.290911
1492	1	0.285238
1493	0.681	0.279434
1494	0.2	0.2735
1495	0.509	0.267435
1496	1.62	0.261242
1497	0.617	0.254919
1498	0.506	0.248467
1499	0.715	0.241887
1500	0.434	0.235178
1501	1.02	0.228342
1502	1.12	0.221379
1503	0.28	0.214289
1504	-0.121	0.207072
1505	0.268	0.199729
1506	0.277	0.19226
1507	-0.124	0.184666
1508	0.544	0.176948
1509	0.723	0.169104
1510	0.732	0.161136
1511	0.72	0.153045
1512	0.379	0.14483
1513	0.368	0.136492
1514	0.607	0.128045
1515	0.555	0.119576
1516	0.00384	0.111101
1517	0.0725	0.102621
1518	-0.249	0.0941387
1519	0.37	0.0856553
1520	0.578	0.0771731
1521	0.187	0.0686938
1522	0.0154	0.0602193
1523	-0.196	0.0517516
1524	-0.198	0.0432925
1525	0.471	0.0348439
1526	0.31	0.0264076
1527	-0.312	0.0179856
1528	-0.524	0.00957968
1529	-0.625	0.00119176
1530	0.0334	-0.00717629
1531	0.412	-0.0155226
1532	-0.25	-0.0238452
1533	-0.381	-0.0321424
1534	-0.223	-0.0404121
1535	-0.645	-0.0486526
1536	-0.916	-0.056862
1537	-0.748	-0.0650383
1538	-0.639	-0.0731797
1539	-0.121	-0.0812844
1540	-0.363	-0.0893503
1541	0.0854	-0.0973758
1542	-0.186	-0.105359
1543	-0.578	-0.113298
1544	-0.0497	-0.12119
1545	0.109	-0.129035
1546	0.227	-0.136829
1547	0.0949	-0.144572
1548	0.543	-0.152261
1549	-0.499	-0.159894
1550	-0.32	-0.16747
1551	-0.332	-0.174987
1552	-0.0342	-0.182443
1553	0.00396	-0.189835
1554	-0.168	-0.197163
1555	-0.14	-0.204423
1556	-0.112	-0.211615
1557	-0.554	-0.218736
1558	-0.436	-0.225785
1559	-0.398	-0.23276
1560	-0.419	-0.239658
1561	-0.611	-0.246478
1562	-0.233	-0.253218
1563	-0.415	-0.259877
1564	-0.617	-0.266451
1565	-0.799	-0.27294
1566	-0.382	-0.279341
1567	-0.254	-0.285653
1568	0.0944	-0.291874
1569	0.162	-0.298002
1570	-0.47	-0.304034
1571	-0.762	-0.30997
1572	-0.904	-0.315807
1573	-0.986	-0.321543
1574	-0.338	-0.327177
1575	-0.45	-0.332695
1576	-0.633	-0.33804
1577	-0.655	-0.343208
1578	-0.767	-0.348199
1579	-0.239	-0.353014
1580	-0.681	-0.357654
1581	-0.854	-0.36212
1582	-0.446	-0.366413
1583	-0.368	-0.370535
1584	-0.481	-0.374487
1585	-0.953	-0.378268
1586	-1.05	-0.381881
1587	-0.577	-0.385327
1588	-0.55	-0.388607
1589	-0.852	-0.391721
1590	-0.514	-0.39467
1591	-0.0368	-0.397457
1592	0.0408	-0.400081
1593	-0.252	-0.402545
1594	-0.324	-0.404848
1595	-0.136	-0.406992
1596	-0.749	-0.408978
1597	-0.331	-0.410808
1598	-0.104	-0.412481
1599	-0.256	-0.414
1600	0.211	-0.415365
1601	-0.0712	-0.416578
1602	-0.134	-0.417639
1603	-0.316	-0.418549
1604	-0.319	-0.41931
1605	-0.541	-0.419922
1606	-0.124	-0.420388
1607	-0.246	-0.420706
1608	-0.519	-0.42088
1609	-0.712	-0.420909
1610	-0.114	-0.420795
1611	-0.917	-0.42054
1612	-0.579	-0.420143
1613	-0.802	-0.419606
1614	-0.735	-0.41893
1615	-0.317	-0.418116
1616	-0.27	-0.417166
1617	-0.363	-0.41608
1618	-0.906	-0.414859
1619	-0.528	-0.413504
1620	-0.651	-0.412017
1621	-0.514	-0.410399
1622	-0.486	-0.40865
1623	-0.689	-0.406771
1624	-0.942	-0.404764
1625	-0.725	-0.40263
1626	-0.918	-0.40037
1627	-1.01	-0.397984
1628	-0.963	-0.395475
1629	-0.816	-0.392842
1630	-1.03	-0.390087
1631	-1.13	-0.387212
1632	-0.375	-0.384216
1633	-0.377	-0.381102
1634	-0.61	-0.377869
1635	-0.403	-0.374521
1636	-0.0662	-0.371077
1637	-0.779	-0.367622
1638	-0.462	-0.364163
1639	-0.575	-0.360701
1640	-0.308	-0.357237
1641	-0.391	-0.353771
1642	-0.734	-0.350304
1643	-0.307	-0.346838
1644	-0.00984	-0.343372
1645	-0.403	-0.339907
1646	-0.386	-0.336445
1647	-0.129	-0.332986
1648	-0.302	-0.329531
1649	-0.335	-0.32608
1650	-0.398	-0.322634
1651	-0.211	-0.319195
1652	-0.474	-0.315762
1653	-0.357	-0.312337
1654	0.11	-0.30892
1655	0.276	-0.305512
1656	-0.107	-0.302114
1657	-0.19	-0.298726
1658	-0.543	-0.29535
1659	-0.456	-0.291986
1660	0.511	-0.288635
1661	-0.392	-0.285297
1662	-0.696	-0.281973
1663	0.271	-0.278665
1664	0.0879	-0.275372
1665	-0.0353	-0.272096
1666	-0.469	-0.268837
1667	-0.692	-0.265596
1668	-0.065	-0.262374
1669	-0.298	-0.259172
1670	0.0185	-0.25599
1671	0.155	-0.252829
1672	-0.158	-0.24969
1673	-0.321	-0.246574
1674	-0.475	-0.243481
1675	-0.058	-0.240412
1676	0.179	-0.237367
1677	0.0953	-0.234349
1678	-0.308	-0.231357
1679	-0.101	-0.228391
1680	-0.315	-0.225454
1681	-0.628	-0.222546
1682	-0.891	-0.219666
1683	-0.545	-0.216817
1684	-0.348	-0.213999
1685	-0.572	-0.211212
1686	-0.725	-0.208458
1687	-0.159	-0.205737
1688	-0.672	-0.20305
1689	-0.405	-0.200397
1690	0.431	-0.19778
1691	0.0377	-0.195199
1692	-0.246	-0.192654
1693	-0.459	-0.190148
1694	-0.123	-0.18768
1695	-0.326	-0.185251
1696	0.28	-0.182862
1697	0.897	-0.180499
1698	0.0332	-0.178118
1699	-0.42	-0.175715
1700	0.106	-0.173291
1701	0.303	-0.170845
1702	0.359	-0.168377
1703	0.295	-0.165888
1704	1.03	-0.163376
1705	0.838	-0.160841
1706	1.43	-0.158284
1707	1.12	-0.155704
1708	0.468	-0.153101
1709	0.494	-0.150476
1710	0.59	-0.147826
1711	0.167	-0.145153
1712	0.063	-0.142457
1713	-0.481	-0.139737
1714	-0.384	-0.136992
1715	0.152	-0.134224
1716	0.108	-0.131431
1717	-0.145	-0.128613
1718	-0.519	-0.125771
1719	-0.343	-0.122903
1720	-0.686	-0.120011
1721	-0.48	-0.117093
1722	-0.254	-0.11415
1723	0.173	-0.111181
1724	0.689	-0.108186
1725	0.305	-0.105166
1726	-0.549	-0.102119
1727	-0.0724	-0.0990454
1728	-0.266	-0.0959455
1729	-0.24	-0.0928189
1730	0.336	-0.0896653
1731	0.313	-0.0864846
1732	-0.281	-0.0832766
1733	-0.605	-0.0800412
1734	-0.439	-0.0767781
1735	-0.313	-0.0734872
1736	-0.496	-0.0701683
1737	-0.23	-0.0668212
1738	-0.324	-0.0634458
1739	-0.248	-0.0600418
1740	-0.302	-0.056609
1741	-0.0856	-0.0531474
1742	0.0706	-0.0496567
1743	0.0567	-0.0461367
1744	-0.0771	-0.0425873
1745	0.00902	-0.0390083
1746	-0.215	-0.0353994
1747	0.0913	-0.0317606
1748	0.0674	-0.0280916
1749	0.453	-0.0243923
1750	-0.23	-0.0206624
1751	-0.264	-0.0169018
1752	-0.378	-0.0131104
1753	-0.522	-0.00928787
1754	-0.026	-0.00543411
1755	-0.18	-0.00154894
1756	-0.624	0.00236784
1757	-0.138	0.00631641
1758	-0.0618	0.0102836
1759	-0.406	0.0142371
1760	-0.6	0.0181752
1761	-0.264	0.0220981
1762	-0.0876	0.0260057
1763	-0.442	0.029898
1764	0.104	0.0337749
1765	0.0905	0.0376365
1766	-0.233	0.0414828
1767	-0.0275	0.0453137
1768	-0.0815	0.0491293
1769	-0.225	0.0529294
1770	-0.629	0.0567142
1771	0.0965	0.0604836
1772	-0.247	0.0642376
1773	-0.452	0.0679761
1774	-0.756	0.0716992
1775	-0.61	0.0754068
1776	-0.104	0.079099
1777	0.172	0.0827758
1778	-0.402	0.086437
1779	-0.0657	0.0900827
1780	0.4	0.0937129
1781	-0.0838	0.0973277
1782	0.162	0.100927
1783	-0.182	0.10451
1784	-0.176	0.108079
1785	0.24	0.111631
1786	0.656	0.115168
1787	0.572	0.118689
1788	0.528	0.122195
1789	0.754	0.125685
1790	-0.0305	0.12916
1791	0.0754	0.132619
1792	0.271	0.136062
1793	0.637	0.139489
1794	0.393	0.142901
1795	0.619	0.146297
1796	1.05	0.149678
1797	0.411	0.153043
1798	0.147	0.156392
1799	0.292	0.159725
1800	0.388	0.163043
1801	-0.256	0.166345
1802	0.65	0.169631
1803	-0.414	0.172901
1804	-0.628	0.176155
1805	0.288	0.179394
1806	0.563	0.182617
1807	0.489	0.185824
1808	0.215	0.189015
1809	0.131	0.192191
1810	0.447	0.19535
1811	0.313	0.198494
1812	0.628	0.201622
1813	0.714	0.204734
1814	0.55	0.20783
1815	0.426	0.21091
1816	0.292	0.213974
1817	0.957	0.217022
1818	1.25	0.220054
1819	0.859	0.223049
1820	0.885	0.225963
1821	0.501	0.228797
1822	-0.124	0.23155
1823	0.382	0.234224
1824	0.518	0.23682
1825	0.574	0.239338
1826	0.43	0.241779
1827	0.305	0.244144
1828	0.711	0.246434
1829	0.607	0.248648
1830	0.263	0.250788
1831	0.388	0.252856
1832	0.204	0.25485
1833	0.02	0.256773
1834	0.216	0.258624
1835	0.202	0.260405
1836	-0.183	0.262117
1837	-0.037	0.26376
1838	0.149	0.265334
1839	0.235	0.266841
1840	0.62	0.268282
1841	0.416	0.269656
1842	0.682	0.270965
1843	0.238	0.27221
1844	0.323	0.273391
1845	0.169	0.274509
1846	0.285	0.275565
1847	-0.21	0.276559
1848	0.176	0.277492
1849	0.0719	0.278366
1850	0.218	0.27918
1851	0.133	0.279936
1852	-0.0809	0.280633
1853	0.255	0.281274
1854	0.601	0.281858
1855	0.746	0.282387
1856	0.742	0.282861
1857	1.07	0.28328
1858	0.183	0.283646
1859	0.409	0.28396
1860	0.475	0.284222
1861	0.6	0.284432
1862	-0.0138	0.284592
1863	-0.178	0.284702
1864	0.108	0.284764
1865	-0.0367	0.284777
1866	0.299	0.284742
1867	-0.0953	0.284661
1868	-0.63	0.284534
1869	-0.554	0.284362
1870	-0.958	0.284145
1871	-0.283	0.283884
1872	0.713	0.28358
1873	0.369	0.283234
1874	0.434	0.282846
1875	0.47	0.282417
1876	0.396	0.281948
1877	0.252	0.28144
1878	0.347	0.280893
1879	0.603	0.280308
1880	0.239	0.279737
1881	0.274	0.279262
1882	0.17	0.278883
1883	0.216	0.278603
1884	0.291	0.278422
1885	0.547	0.27834
1886	0.673	0.27836
1887	0.458	0.278481
1888	0.124	0.278704
1889	-0.12	0.279031
1890	0.0153	0.279462
1891	-0.289	0.279998
1892	0.677	0.28064
1893	0.512	0.281388
1894	0.068	0.282244
1895	0.424	0.283208
1896	0.509	0.284282
1897	-0.365	0.285466
1898	-0.559	0.286761
1899	-0.134	0.288168
1900	-0.118	0.289687
1901	0.788	0.29132
1902	0.803	0.293067
1903	0.179	0.29493
1904	0.505	0.296908
1905	0.75	0.299004
1906	0.766	0.301218
1907	0.231	0.30355
1908	-0.423	0.306002
1909	-0.267	0.308574
1910	0.288	0.311267
1911	0.154	0.314083
1912	-0.22	0.317021
1913	0.135	0.320083
1914	0.121	0.32327
1915	-0.00331	0.326583
1916	0.0823	0.330022
1917	0.138	0.333588
1918	0.574	0.337282
1919	0.839	0.341105
1920	0.605	0.345058
1921	0.471	0.349141
1922	0.486	0.353356
1923	0.722	0.357704
1924	0.607	0.362184
1925	0.363	0.366799
1926	0.249	0.371549
1927	-0.236	0.376434
1928	0.27	0.381456
1929	0.346	0.386616
1930	0.711	0.391914
1931	0.577	0.397351
1932	0.343	0.402928
1933	-0.0617	0.408646
1934	0.384	0.414506
1935	-0.45	0.420508
1936	-0.355	0.426654
1937	0.00082	0.432945
1938	-0.264	0.43938
1939	0.162	0.445962
1940	0.198	0.45269
1941	0.473	0.459621
1942	0.519	0.466822
1943	0.535	0.474291
1944	0.26	0.482023
1945	0.0559	0.490016
1946	0.512	0.498267
1947	0.977	0.506773
1948	0.233	0.515529
1949	-0.0415	0.524534
1950	0.494	0.533783
1951	0.26	0.543273
1952	0.285	0.553002
1953	0.461	0.562966
1954	1.4	0.573162
1955	0.342	0.583586
1956	-0.0121	0.594236
1957	0.464	0.605107
1958	1.1	0.616198
1959	0.725	0.627504
1960	-0.0596	0.639023
1961	0.456	0.650751
1962	0.372	0.662684
1963	0.277	0.674821
1964	-0.187	0.687157
1965	-0.0314	0.699689
1966	-0.396	0.712415
1967	0.29	0.72533
1968	0.0055	0.738432
1969	0.351	0.751718
1970	0.957	0.765183
1971	0.942	0.778825
1972	0.238	0.792642
1973	0.254	0.806628
1974	0.839	0.820782
1975	0.985	0.8351
1976	0.931	0.849579
1977	1.29	0.864215
1978	1.17	0.879005
1979	0.247	0.893947
1980	0.933	0.909037
1981	1.24	0.924271
1982	0.304	0.939647
1983	1.01	0.955161
1984	1.06	0.97081
1985	1.29	0.98659
1986	1.54	1.0025
1987	1	1.01853
1988	1.22	1.03469
1989	1.1	1.05097
1990	0.809	1.06736
1991	1.1	1.08386
1992	1.42	1.10047
1993	1.44	1.11719
1994	0.892	1.13401
1995	1.34	1.15093
1996	1.18	1.16795
1997	1.57	1.18506
1998	1.94	1.20226
1999	1.3	1.21955
2000	0.996	1.23692
2001	1.04	1.25437

## Sheet: C_SouthRhody
YearCE	CalYrBP	depth_cm	Water-table depth (cm)	WTD_error
1995.4	-45.4	1.5	22.9527	7.99563
1985.9	-35.9	3.5	14.3085	8.01142
1976.5	-26.5	5.5	11.742	8.01178
1967.1	-17.1	7.5	12.336	8.01982
1958.2	-8.2	9.5	12.8562	8.01721
1949.8	0.2	11.5	24.3709	8.01341
1941.5	8.5	13.5	9.95837	8.06139
1933.1	16.9	15.5	16.4378	7.98767
1923.7	26.3	17.5	3.60839	7.99623
1913.2	36.8	19.5	4.94797	8.00707
1902.7	47.3	21.5	14.4504	8.00328
1892.2	57.8	23.5	41.7702	8.36315
1880.7	69.3	25.5	15.3035	8.02101
1868.2	81.8	27.5	10.6756	7.99288
1855.7	94.3	29.5	7.00407	7.99813
1843.2	106.8	31.5	2.3128	7.99712
1827.9	122.1	33.5	2.18412	8.02785
1809.9	140.1	35.5	15.0082	7.99255
1791.9	158.1	37.5	8.12401	8.01335
1773.9	176.1	39.5	3.10904	8.00538
1757.7	192.3	41.5	10.7975	7.99613
1743.3	206.7	43.5	2.82515	8.02528
1728.9	221.1	45.5	12.9066	8.03213
1714.6	235.4	47.5	9.48707	8.00695
1690.9	259.1	49.5	21.2094	7.99735
1657.9	292.1	51.5	15.3533	7.98814
1625	325	53.5	0.643864	8.017
1592	358	55.5	2.23381	7.99998
1548.1	401.9	57.5	6.10313	7.99896
1493.2	456.8	59.5	8.31469	7.9969
1438.3	511.7	61.5	12.0506	8.01936
1383.4	566.6	63.5	5.76025	7.99624
1342	608	65.5	5.7473	8.01608
1314	636	67.5	12.1187	8.03198
1286.1	663.9	69.5	9.81105	8.04162
1258.1	691.9	71.5	7.90743	7.99521
1234.4	715.6	73.5	7.62118	7.99167
1214.8	735.2	75.5	6.84792	8.16383
1195.2	754.8	77.5	8.2842	8.01369
1175.6	774.4	79.5	9.00667	7.99756
1160.2	789.8	81.5	3.56115	8.00056
1148.8	801.2	83.5	6.10483	8.00652
1137.5	812.5	85.5	9.59155	7.99943
1126.2	823.8	87.5	4.75005	7.9969
1098.9	851.1	89.5	5.32851	7.99639
1055.7	894.3	91.5	4.45101	8.00079
990.8	959.2	94.5	0.801239	8.00306
947.5	1002.5	96.5	6.41748	7.99691
924.8	1025.2	98.5	3.30819	8.00302
902.1	1047.9	100.5	7.07856	8.00267
879.3	1070.7	102.5	5.7348	8.00145
856.6	1093.4	104.5	12.5829	7.99414
827.7	1122.3	106.5	10.9928	7.99177
798.8	1151.2	108.5	7.31566	7.99771
769.9	1180.1	110.5	7.51742	7.99826
741	1209	112.5	10.4382	7.99504
713.3	1236.7	114.5	8.75445	7.99977
685.6	1264.4	116.5	7.24702	7.99642
657.9	1292.1	118.5	11.561	7.99585
630.2	1319.8	120.5	10.5887	7.99511
586.9	1363.1	122.5	4.03646	8.02275
543.6	1406.4	124.5	5.61293	8.00442
500.4	1449.6	126.5	3.71218	7.99911
452.9	1497.1	129.5	17.9095	8.02858
448.7	1501.3	130.5	6.13675	7.99095
436.2	1513.8	133.5	11.4873	8.0231
427.9	1522.1	135.5	8.02748	8.01688
413.2	1536.8	137.5	9.2884	7.99989
392.1	1557.9	139.5	10.1984	8.03596
381.5	1568.5	140.5	12.5031	7.99666
349.9	1600.1	143.5	4.13719	8.01854
322.4	1627.6	145.5	8.75878	7.99711
288.4	1661.6	147.5	2.61538	8.03966
254.5	1695.5	149.5	25.5989	8.01216
183.8	1766.2	153.5	13.075	8.08502
144.1	1805.9	155.5	18.6357	8.02679
104.5	1845.5	157.5	11.2753	8.13099
64.8	1885.2	159.5	16.2987	8.02219
45	1905	160.5	1.32445	8.00439
-91.1	2041.1	163.5	5.58918	7.99513
-181.9	2131.9	165.5	5.05853	8.005
-272.6	2222.6	167.5	3.44355	8.003
-323.8	2273.8	169.5	8.99746	8.0421
-329.7	2279.7	170.5	12.0283	8.04486
-341.4	2291.4	172.5	8.59547	8.00312
-359	2309	175.5	10.9725	7.99987
-369.1	2319.1	177.5	1.82575	8.00909
-377.5	2327.5	179.5	3.92551	8.0536
-381.8	2331.8	180.5	14.8801	8.01256
-394.5	2344.5	183.5	24.3858	8.10211
-408.2	2358.2	185.5	13.8028	8.00971
-427.1	2377.1	187.5	20.0986	7.98841
-446.1	2396.1	189.5	16.2024	8.00761
-527.4	2477.4	195.5	20.4135	8.04805
-545	2495	196.5	13.752	8.00154
-580.3	2530.3	198.5	15.5811	8.00447
-615.5	2565.5	200.5	6.51522	7.99914
-641.5	2591.5	202.5	10.1628	7.99437
-667.4	2617.4	204.5	17.5174	8.01807
-693.4	2643.4	206.5	11.275	8.01009
-719.4	2669.4	208.5	9.06312	8.00657
-740.2	2690.2	210.5	4.49805	8.03712
-761.1	2711.1	212.5	4.71868	8.05016
-781.9	2731.9	214.5	6.49192	8.06186
-792.3	2742.3	215.5	12.1671	8.11699
-849	2799	218.5	-0.929956	8.01467
-895.2	2845.2	220.5	3.84128	8.01922
-941.5	2891.5	222.5	6.20964	8.03224
-1033.6	2983.6	226.5	10.5144	8.09715
-1079.5	3029.5	228.5	9.31976	8.08127
-1125.3	3075.3	230.5	12.3036	8.13299
-1171.1	3121.1	232.5	2.36235	8.05279
-1212.2	3162.2	234.5	8.90171	8.08443
-1253.3	3203.3	236.5	9.45615	8.10413
-1294.4	3244.4	238.5	2.89897	8.07791
-1335.5	3285.5	240.5	8.56045	8.04675
-1381.5	3331.5	242.5	7.56625	8.04248
-1427.4	3377.4	244.5	2.97623	8.02825
-1473.3	3423.3	246.5	-2.624	8.08506
-1519.3	3469.3	248.5	4.08894	8.0521
-1580.5	3530.5	250.5	-0.687269	8.08461
-1641.7	3591.7	252.5	5.04989	8.04637
-1702.9	3652.9	254.5	3.53685	8.03589
-1764.1	3714.1	256.5	5.94987	8.02571
-1792.3	3742.3	258.5	11.0698	8.03933
-1820.5	3770.5	260.5	-1.07918	8.07449
-1848.6	3798.6	262.5	-3.48003	8.11729
-1913	3863	266.5	0.977069	8.01569
-1949.2	3899.2	268.5	-0.39739	8.05524
-1985.3	3935.3	270.5	7.69778	8.06544
-2021.5	3971.5	272.5	4.132	8.05103
-2062.2	4012.2	274.5	12.6957	8.00675
-2082.5	4032.5	275.5	8.80714	8.00318
-2123.2	4073.2	277.5	26.9568	8.00596
-2143.5	4093.5	278.5	34.5931	8.1504
-2163.8	4113.8	279.5	39.3777	8.36129
-2184.1	4134.1	280.5	31.6857	8.04482
-2229.8	4179.8	281.5	3.64866	8.00862
-2275.4	4225.4	282.5	-2.51836	8.03007
-2321.1	4271.1	283.5	1.41913	8.00789
-2366.7	4316.7	284.5	5.03324	7.99807
-2458	4408	286.5	-1.99079	8.05564
-2549.3	4499.3	288.5	7.13741	7.99578
-2559.7	4509.7	289.5	7.59074	8.00947
-2570.1	4520.1	290.5	10.6175	7.99397
-2580.5	4530.5	291.5	8.67085	7.99644
-2590.8	4540.8	292.5	12.7159	7.99552
-2601.2	4551.2	293.5	9.60057	8.00449
-2611.6	4561.6	294.5	9.29912	8.00682
-2632.3	4582.3	296.5	17.6461	7.99327
-2651.6	4601.6	297.5	10.111	7.99659
-2671	4621	298.5	7.62254	8.0025
-2690.3	4640.3	299.5	7.52973	7.99714
-2709.6	4659.6	300.5	9.95837	8.06139
-2728.9	4678.9	301.5	7.20512	8.01707
-2748.2	4698.2	302.5	8.6167	8.00348
-2767.5	4717.5	303.5	9.29674	8.00153
-2815.3	4765.3	305.5	7.45615	8.00093
-2872.4	4822.4	307.5	7.58671	8.00802
-2900.9	4850.9	308.5	17.6659	7.99203
-2929.5	4879.5	309.5	14.3043	7.99476
-2958	4908	310.5	4.12096	8.00874
-2986.5	4936.5	311.5	4.06353	8.00667
-3015	4965	312.5	9.83651	8.01331
-3047.1	4997.1	313.5	12.3346	8.0047
-3079.1	5029.1	314.5	6.57926	8.00572
-3143.2	5093.2	316.5	10.9285	8.00102
-3175.3	5125.3	317.5	3.70159	8.00742
-3207.4	5157.4	318.5	-2.28567	8.04939
-3239.4	5189.4	319.5	-2.08257	8.03385
-3271.5	5221.5	320.5	-0.258649	8.02497
-3275.2	5225.2	321.5	1.43675	8.01238
-3279	5229	322.5	4.75437	8.00225
-3282.7	5232.7	323.5	4.86781	8.00208
-3286.5	5236.5	324.5	6.23116	8.01583
-3294	5244	326.5	10.0327	8.06199
-3297.7	5247.7	327.5	12.2099	8.06079

## Sheet: C_Pinhook
YearCE	CalYrBP	depth_cm	Water-table depth (cm)	WTD_error	detrended wtd (cm)
1969.4	-19.4	5.5	19.9984	9.5941	2.8932
1948	2	7.5	24.4248	8.214	3.1233
1911.5	38.5	11.5	13.6369	8.0731	-0.6426
1893.5	56.5	15.5	14.1485	8.1303	-1.0648
1877.9	72.1	17.5	14.7578	8.1809	-0.8456
1841	109	21.5	10.1869	8.0905	-1.9155
1787.2	162.8	25.5	14.2182	8.1326	4.668
1752.8	197.2	27.5	12.2266	8.1352	0.6918
1696.7	253.3	31.5	13.9191	8.0813	-0.3807
1679.3	270.7	35.5	7.0465	8.0784	-4.189
1672.3	277.7	37.5	13.6041	8.0796	-3.7851
1564	386	51.5	7.4331	8.0869	-2.9794
1547.4	402.6	55.5	10.7734	8.0822	0.964
1519.3	430.7	57.5	9.6803	8.0838	-1.3646
1475.6	474.4	61.5	9.0139	8.0823	-3.0714
1469.1	480.9	65.5	7.489	8.08	-4.1593
1450.5	499.5	67.5	10.4301	8.0942	2.0076
1418.9	531.1	71.5	12.2401	8.1365	6.4125
1403.4	546.6	75.5	11.6892	8.1035	2.6209
1399.2	550.8	77.5	14.5686	8.1379	2.5167
1385.6	564.4	81.5	18.3111	8.0727	0.8286
1356.6	593.4	85.5	7.9772	8.0751	-5.5583
1352.2	597.8	87.5	10.3829	8.0737	-1.7515
1343.2	606.8	91.5	20.1892	8.1633	4.8824
1324.9	625.1	96.5	19.8171	8.1107	2.8179
1290.2	659.8	100.5	8.2245	8.0908	-4.299
1277.7	672.3	102.5	18.4616	8.122	0.7765
1255.2	694.8	106.5	13.3079	8.0921	1.9387
1240.4	709.6	110.5	9.9905	8.0739	-4.1675
1228.5	721.5	112.5	11.4311	8.085	-0.5479
1201.3	748.7	116.5	10.461	8.137	4.0057
1164	786	120.5	11.9125	8.0976	-0.3117
1146.3	803.7	122.5	15.1051	8.1196	-0.2242
1116.8	833.2	126.5	16.9121	8.1534	2.9585
1104.5	845.5	130.5	15.1291	8.0766	-3.5297
1100.3	849.7	132.5	15.1051	8.1196	-0.4848
1093.1	856.9	136.5	22.2672	8.0923	-0.3666
1089.4	860.6	140.5	11.9508	8.0814	-2.4911
1080.4	869.6	142.5	19.2768	8.1619	3.9364
1062.9	887.1	146.5	9.489	8.1433	1.4732
1046.9	903.1	150.5	17.0992	8.0917	-1.035
1036.3	913.7	152.5	10.1769	8.0829	-4.2072
1017.2	932.8	156.5	22.2603	8.103	7.6268
1004	946	160.5	18.2259	8.1135	0.3681
994.8	955.2	162.5	8.6095	8.1096	-2.523
978.7	971.3	166.5	13.4065	8.0768	-4.6622
969.4	980.6	170.5	12.3649	8.0843	-3.5476
962.6	987.4	172.5	4.5742	8.0858	-9.4952
947.9	1002.1	176.5	21.06	8.1348	6.0614
929.7	1020.3	180.5	22.6195	8.1148	1.7632
924.2	1025.8	182.5	16.3748	8.1228	2.5386
910.9	1039.1	186.5	26.433	8.1259	1.3253
895.6	1054.4	189.5	19.8694	8.138	0.2362
870.9	1079.1	193.5	26.6897	8.1581	2.1123
857.9	1092.1	195.5	20.3925	8.1789	0.1661
842.6	1107.4	199.5	19.8454	8.1067	3.0905
803.7	1146.3	203.5	22.2616	8.1556	1.0314
780.3	1169.7	205.5	19.0546	8.1117	-3.4801
771.9	1178.1	209.5	19.3136	8.1629	3.1863
756.8	1193.2	213.5	15.4518	8.1162	-0.8921
748.1	1201.9	215.5	21.2702	8.1209	1.173
726.6	1223.4	219.5	29.8297	8.1811	4.3788
712.5	1237.5	223.5	4.9336	8.1347	-0.9814
706.7	1243.3	225.5	8.3333	8.0889	-9.4239
680.9	1269.1	229.5	27.7293	8.1385	2.3771
661.2	1288.8	233.5	15.1759	8.1296	-5.0742
652.3	1297.7	235.5	23.8761	8.1444	4.0292
634.4	1315.6	239.5	18.9941	8.1687	-2.1118
624.2	1325.8	243.5	14.4887	8.1065	-2.5784
620.3	1329.7	245.5	18.9365	8.1475	2.6679
598.3	1351.7	249.5	22.402	8.2232	5.0811
582.3	1367.7	253.5	20.8423	8.1413	-0.7748
575.2	1374.8	255.5	24.6891	8.1825	2.9356
558.9	1391.1	259.5	23.0486	8.155	2.7909
541.7	1408.3	263.5	21.1903	8.16	3.4352
533	1417	265.5	23.4632	8.1871	4.1931
507.2	1442.8	269.5	22.9484	8.1737	-0.2415
486.7	1463.3	273.5	15.4472	8.1732	4.7201
477.4	1472.6	275.5	16.7014	8.1786	-0.3595
448.6	1501.4	279.5	20.149	8.1957	-1.4661
415.9	1534.1	282.5	15.8194	8.2155	-4.3555
366	1584	286.5	12.8715	8.1423	1.1032
342.6	1607.4	288.5	20.1742	8.2476	1.1046
306.7	1643.3	292.5	19.6757	8.2011	2.3561
282.9	1667.1	296.5	11.1151	8.1647	-1.5562
257.4	1692.6	302.5	14.7828	8.2326	0.201
232.2	1717.8	306.5	19.1444	8.1683	-2.3821
198.9	1751.1	308.5	10.9565	8.1539	-3.7651
149.1	1800.9	312.5	12.6883	8.17	-1.2518
114.2	1835.8	316.5	17.117	8.1859	2.0728
93.6	1856.4	318.5	7.7886	8.1421	-4.8746
73	1877	331.5	16.2356	8.1216	5.3691

## Sheet: C_IrwinSmith
YearCE	CalYrBP	depth_cm	Water-table depth (cm)	WTD_error
1990.6	-40.6	1.5	36.0324	6.8004
1961.8	-11.8	3.5	36.5104	6.8742
1932.9	17.1	5.5	42.8875	6.9217
1896.1	53.9	7.5	36.1424	7.1471
1859.3	90.7	9.5	36.5231	6.8654
1823.5	126.5	11.5	29.4272	8.1424
1788.6	161.4	13.5	39.1537	7.118
1753.7	196.3	15.5	26.1122	7.6894
1673.2	276.8	17.5	32.0165	6.986
1592.7	357.3	19.5	23.0443	7.7247
1530.5	419.5	21.5	20.3132	7.3371
1486.4	463.6	23.5	18.1705	6.8765
1442.3	507.7	25.5	14.7179	6.7827
1398	552	27.5	10.767	7.1575
1353.6	596.4	29.5	10.6842	7.4308
1315.6	634.4	31.5	6.1933	6.7986
1299.7	650.3	32.5	10.4826	6.7924
1283.7	666.3	33.5	5.8143	6.799
1267.8	682.2	34.5	10.6515	6.782
1251.9	698.1	35.5	9.4155	6.793
1246.5	703.5	36.5	6.9329	6.8173
1241.1	708.9	37.5	6.6904	6.7893
1235.7	714.3	38.5	11.1597	6.7963
1230.2	719.8	39.5	18.428	6.7793
1224.8	725.2	40.5	43.0326	6.9209
1213.1	736.9	41.5	12.1202	6.7938
1201.5	748.5	42.5	12.7661	6.7985
1189.8	760.2	43.5	18.5807	6.7789
1178.1	771.9	44.5	26.2204	6.8049
1166.4	783.6	45.5	31.3199	6.8679
1150.8	799.2	46.5	40.1128	6.9345
1135.2	814.8	47.5	34.5804	6.9782
1119.6	830.4	48.5	45.2826	7.4891
1104	846	49.5	41.1756	7.2001
1088.4	861.6	50.5	37.1296	6.9381
1069.6	880.4	51.5	39.3494	7.2088
1050.9	899.1	52.5	38.4765	6.8967
1032.1	917.9	53.5	38.2866	7.0542
1013.4	936.6	54.5	46.6229	6.986
994.6	955.4	55.5	42.6379	7.4201
1950		56.5	42.4139	7.2387
1950		57.5	42.7896	7.0902
259.8	1690.2	58.5	40.6085	7.394
197.4	1752.6	59.5	44.6293	7.3103
134.9	1815.1	60.5	44.729	7.3632
72.4	1877.6	61.5	39.7671	7.07
9.9	1940.1	62.5	14.5108	6.8284
-52.5	2002.5	63.5	5.5938	6.8162
-115	2065	64.5	36.381	7.0937
-177.5	2127.5	65.5	42.4515	7.1413
-239.9	2189.9	66.5	27.7957	6.9702
-302.4	2252.4	67.5	41.2774	7.0695
-364.9	2314.9	68.5	33.4029	7.0072
-401.5	2351.5	69.5	32.1793	7.3306
-438.2	2388.2	70.5	32.7693	6.9398
-474.8	2424.8	71.5	36.8527	6.9956
-511.4	2461.4	72.5	39.0691	6.9143
-548.1	2498.1	73.5	20.1533	6.938
-579.45	2529.45	74.5	34.5136	7.2196
-642	2592	75.5	35.5405	7.3593
-704.6	2654.6	76.5	35.8966	7.0451
-767.15	2717.15	77.5	34.2556	7.2959
-833.9	2783.9	78.5	31.9106	7.2101
-904.9	2854.9	79.5	35.1325	7.1856
-975.9	2925.9	80.5	25.122	7.1522
-1046.9	2996.9	81.5	32.1158	6.9864
-1117.9	3067.9	82.5	40.9084	7.1758
-1186.05	3136.05	83.5	40.4947	7.1904
-1251.3	3201.3	84.5	42.9606	7.212
-1316.55	3266.55	85.5	46.1864	6.9391
-1381.85	3331.85	86.5	39.5155	7.0916
-1447.1	3397.1	87.5	43.585	7.1634
-1526.4	3476.4	88.5	40.2072	7.2488
-1619.75	3569.75	89.5	41.2595	7.2816
-1713.1	3663.1	90.5	40.8713	7.2742
-1806.45	3756.45	91.5	39.6159	7.4171
-2500	4450	97.5	28.8245	6.9575
-2601.1	4551.1	98.5	37.7315	7.1659
-2680.25	4630.25	99.5	35.7269	6.853
-2759.35	4709.35	100.5	44.2852	7.1619
-2838.5	4788.5	101.5	46.1914	6.8859
-2917.65	4867.65	102.5	37.7897	6.9561
-2968.6	4918.6	103.5	24.9367	6.9345
-2991.4	4941.4	104.5	17.5583	7.2814
-3014.2	4964.2	105.5	18.4349	8.0083
-3037	4987	106.5	17.3097	7.6709
-3059.8	5009.8	107.5	13.626	7.7299
-3075.45	5025.45	108.5	14.66	7.2745
-3083.95	5033.95	109.5	18.8772	7.3202
-3092.45	5042.45	110.5	11.8462	7.1744
-3100.9	5050.9	111.5	16.9279	8.9036
-3109.35	5059.35	112.5	17.4236	7.4448
-3134.95	5084.95	113.5	14.978	7.4374
-3177.7	5127.7	114.5	14.4197	7.6342
-3220.45	5170.45	115.5	15.4143	8.561
-3263.15	5213.15	116.5	19.5891	8.043
-3305.85	5255.85	117.5	20.9021	7.5574
-3340.8	5290.8	118.5	19.3878	8.5816
-3367.95	5317.95	119.5	21.2395	8.4071
-3395.1	5345.1	120.5	27.8584	8.2295
-3422.25	5372.25	121.5	21.4433	8.1297
-3449.4	5399.4	122.5	17.4204	7.8003
-3473.4	5423.4	123.5	25.6877	8.474
-3494.2	5444.2	124.5	30.1134	7.8944
-3514.95	5464.95	125.5	25.2013	8.243
-3535.7	5485.7	126.5	26.6551	7.8813
-3556.5	5506.5	127.5	21.3862	7.614
-3582.3	5532.3	128.5	24.0706	7.9694
-3613.05	5563.05	129.5	23.92	8.1975
-3643.8	5593.8	130.5	34.9536	7.2895
-3674.6	5624.6	131.5	38.3548	7.4267
-3705.35	5655.35	132.5	36.5373	7.5925
-3732.8	5682.8	133.5	22.4835	8.2844
-3757	5707	134.5	27.5361	8.107
-3781.2	5731.2	135.5	41.7217	7.1697
-3805.4	5755.4	136.5	32.792	7.3105
-3829.55	5779.55	137.5	30.2999	7.5143
-3858.7	5808.7	138.5	21.7051	7.3185
-3892.9	5842.9	139.5	12.2839	7.0595
-3927.05	5877.05	140.5	14.4445	6.9984
-3961.2	5911.2	141.5	26.6891	7.5203
-3995.35	5945.35	142.5	26.8743	7.3101
-4019.45	5969.45	143.5	16.0018	8.7079
-4033.5	5983.5	144.5	18.5205	9.0888
-4047.5	5997.5	145.5	26.1052	8.5579
-4061.5	6011.5	146.5	25.8335	8.4297
-4075.5	6025.5	147.5	27.3976	8.5225
-4092.4	6042.4	148.5	25.4843	8.464
-4112.25	6062.25	149.5	24.0496	8.9785
-4132.1	6082.1	150.5	33.0028	7.545
-4151.95	6101.95	151.5	28.7683	7.799
-4171.8	6121.8	152.5	32.0952	7.4064
-4195.9	6145.9	153.5	17.5788	8.933
-4224.35	6174.35	154.5	12.2455	7.5742
-4252.8	6202.8	155.5	11.7123	8.2278
-4281.25	6231.25	156.5	13.5829	8.0827
-4309.7	6259.7	157.5	15.1406	9.3382
-4331.45	6281.45	158.5	15.1815	9.3784
-4346.55	6296.55	159.5	14.5376	10.0585
-4361.7	6311.7	160.5	13.9802	8.9817
-4376.85	6326.85	161.5	13.67	9.7766
-4391.95	6341.95	162.5	9.1556	7.1314
-4407.5	6357.5	163.5	7.8295	6.7892
-4423.5	6373.5	164.5	7.5459	6.8016
-4439.45	6389.45	165.5	10.8267	6.7819
-4455.4	6405.4	166.5	17.285	6.7946
-4471.4	6421.4	167.5	21.3412	6.854
-4493.4	6443.4	168.5	14.8445	8.4692
-4521.45	6471.45	169.5	16.2576	8.0571
-4549.55	6499.55	170.5	17.8874	8.6022
-4577.6	6527.6	171.5	17.7494	8.6334
-4605.65	6555.65	172.5	16.236	7.1664
-4624.75	6574.75	173.5	18.9098	8.6463
-4634.85	6584.85	174.5	12.9405	6.9407
-4645	6595	175.5	18.3118	8.196
-4655.15	6605.15	176.5	29.5142	7.0588
-4665.25	6615.25	177.5	27.4803	7.3139
-4671.65	6621.65	178.5	20.3792	8.4231
-4674.4	6624.4	179.5	21.4262	9.2081
-4677.2	6627.2	180.5	12.8421	8.0973
-4679.95	6629.95	181.5	16.9987	9.7215
-4682.7	6632.7	182.5	16.6469	8.8124
-4692.8	6642.8	183.5	15.605	9.9172
-4710.15	6660.15	184.5	13.7957	8.6814
-4727.45	6677.45	185.5	15.4472	9.7092
-4744.8	6694.8	186.5	11.0996	7.2539
-4762.15	6712.15	187.5	15.0752	9.498
-4774.05	6724.05	188.5	7.2761	6.8076
-4780.55	6730.55	189.5	10.729	6.9301
-4787	6737	190.5	11.1787	7.1832
-4793.45	6743.45	191.5	17.6453	8.1309
-4799.95	6749.95	192.5	16.4805	6.8524
-4806.65	6756.65	193.5	12.0978	6.9609
-4813.55	6763.55	194.5	13.919	6.793
-4820.45	6770.45	195.5	11.0823	6.8004
-4827.35	6777.35	196.5	11.9703	6.9564
-4834.25	6784.25	197.5	24.0624	7.4714
-4839.75	6789.75	198.5	16.5408	7.4449
-4843.85	6793.85	199.5	25.3053	7.7865
-4847.95	6797.95	200.5	20.9851	7.1389
-4856.05	6806.05	202.5	28.488	7.2676
-4874.45	6824.45	204.5	17.6973	8.2789
-4896.25	6846.25	206.5	10.9265	8.1006
-4918.65	6868.65	208.5	12.3735	7.0379
-4942.85	6892.85	210.5	22.4728	7.5497
-4967.05	6917.05	212.5	19.7566	6.8357
-4997.75	6947.75	214.5	24.1304	6.8873
-5030.7	6980.7	216.5	11.9827	6.8237
-5059.8	7009.8	218.5	23.1291	6.8859
-5077.3	7027.3	220.5	20.507	6.909
-5094.9	7044.9	222.5	11.8233	6.8629
-5109.85	7059.85	228.5	4.0934	6.9211

## Sheet: C_Saco
YearCE	CalYrBP	depth_cm	Water-table depth (cm)	WTD_error	WTD_detrended
2010.2	-60.2	0	10.2854	8.00603	-2.7411
2009.5	-59.5	1	13.8164	8.00408	0.7924
2008.7	-58.7	2	12.0708	8.01005	-0.9504
2008	-58	3	14.1185	8.02334	1.0997
2007.2	-57.2	4	18.7053	8.05011	5.6893
2003.3	-53.3	5	18.5393	8.07365	5.5364
1999.4	-49.4	6	19.4205	8.07628	6.4299
1995.4	-45.4	7	18.9789	8.08269	6.0003
1991.5	-41.5	8	21.1451	8.09279	8.1773
1984.4	-34.4	9	19.1781	8.04992	6.2281
1977.2	-27.2	10	18.5893	8.1015	5.6548
1970.1	-20.1	11	22.0975	8.07564	9.1757
1962.9	-12.9	12	19.9903	8.06223	7.0788
1954	-4	13	16.918	8.04469	4.0157
1945	5	14	15.8018	8.03319	2.9048
1936	14	15	15.627	8.02435	2.7315
1927.1	22.9	16	14.5854	8.01468	1.6876
1916.6	33.4	17	16.7518	8.03599	3.8469
1906.1	43.9	18	15.3283	8.0237	2.4115
1895.5	54.5	19	16.676	8.02919	3.7428
1885	65	20	13.0133	8.02488	0.0598
1880.3	69.7	21	12.4095	8.00746	-0.554
1875.6	74.4	22	8.36246	8.00891	-4.6122
1870.9	79.1	23	8.9758	8.02074	-4.0104
1866.1	83.9	24	8.63043	8.01181	-4.3683
1860.8	89.2	25	8.7217	8.01193	-4.2914
1855.4	94.6	26	8.693	8.011	-4.3355
1850.1	99.9	27	6.60725	8.00931	-6.4369
1844.7	105.3	28	7.01532	8.02515	-6.0453
1839.9	110.1	29	7.37093	8.01027	-5.7048
1835.2	114.8	30	11.7492	8.00892	-1.3417
1830.4	119.6	31	9.79778	8.028	-3.3088
1825.6	124.4	32	8.0723	8.00616	-5.0503
1823.1	126.9	33	7.68607	8.00719	-5.445
1820.7	129.3	34	6.5442	8.00937	-6.595
1818.2	131.8	35	7.93792	8.00771	-5.2098
1815.8	134.2	36	9.05059	8.01202	-4.1053
1813.1	136.9	37	6.93565	8.01835	-6.2295
1810.5	139.5	38	11.1955	7.99928	-1.9787
1807.9	142.1	39	10.3592	8.0086	-2.824
1805.2	144.8	40	14.9586	8.0038	1.766
1800.4	149.6	41	11.9759	8.00234	-1.2334
1795.7	154.3	42	11.49	8.00315	-1.7357
1790.9	159.1	43	11.4586	8.00545	-1.7839
1786.2	163.8	44	9.60185	8.01192	-3.6571
1780.1	169.9	45	11.0049	8.0021	-2.2753
1774	176	46	4.84482	8.02178	-8.4565
1767.9	182.1	47	9.46353	8.00784	-3.8589
1761.8	188.2	48	9.19545	8.01093	-4.1479
	197.3	49
	206.4	50	9.61859	8.00699	-3.7878
	215.4	51	10.6059	8.00921	-2.8335
	224.5	52	10.7288	8.01735	-2.7479
	226.7	53	10.2393	8.01193	-3.2474
	228.8	54	10.1394	8.00904	-3.3573
	231	55	10.8546	8.00847	-2.6533
	233.2	56	10.6496	8.00974	-2.8702
	237	57	11.5214	8.01152	-2.0209
	240.8	58	13.22	8.00756	-0.348
	244.7	59	8.90915	8.0087	-4.6895
	248.5	60	10.9658	8.00378	-2.6675
	249.5	61	12.2934	8.01371	-1.35
	250.5	62	11.2062	8.01702	-2.4477
	251.4	63	8.80489	8.01354	-4.8589
	252.4	64	14.8909	8.01795	1.2158
	256.5	65	12.7476	8.01268	-0.9792
	260.5	66	13.8422	8.02437	0.0564
	264.6	67	11.4162	8.01432	-2.4395
	268.7	68	16.6568	8.00325	2.7146
	274.1	69	15.8019	8.01374	1.6696
	279.5	70	11.6177	8.00972	-2.71
	284.9	71	14.1435	8.00574	-0.3843
	290.4	72	12.7903	8.03093	-1.9457
	292.5	73	15.5992	8.02315	0.7826
	294.6	74	14.4873	8.05716	-0.4103
	296.8	75	15.8926	8.06218	0.9095
	298.9	76	14.4899	8.08161	-0.5753
	306	77	16.9985	8.0506	1.6527
	313.1	78	17.3787	8.04818	1.7481
	320.2	79	17.0747	8.03603	1.1559
	327.3	80	16.6553	8.01409	0.4455
	337.4	81	19.3645	8.01552	2.7366
	347.6	82	18.3478	8.03189	1.2939
	357.8	83	22.9567	8.05023	5.4737
	368	84	16.9136	8.08815	-1.0009
	373	85	21.7857	8.09887	3.6589
	378.1	86	16.6952	8.08012	-1.6485
	383.2	87	15.4575	8.13898	-3.1036
	388.3	88	16.1467	8.36081	-2.6321
	390.7	89	21.2168	8.24652	2.3355
	393.1	90	17.4424	8.1116	-1.5416
	395.5	91	22.7319	8.12099	3.6453
	397.8	92	16.6698	8.04143	-2.5153
	402.5	93	17.9768	8.03632	-1.4097
	407.2	94	20.9093	8.064	1.3212
	411.9	95	17.819	8.01247	-1.9709
	416.6	96	13.601	8.02967	-6.3908
	423.5	97	15.7605	8.11252	-4.5281
	430.5	98	19.9454	8.11905	-0.6447
	437.4	99	16.4553	8.02241	-4.4323
	444.3	100	13.5963	8.01066	-7.5891
	447	101	15.4908	8.06271	-5.8112
	449.6	102	17.304	7.99814	-4.1104
	452.3	103	15.9346	8.03156	-5.5966
	454.9	104	14.9903	8.02986	-6.6534
	459.1	105	12.6914	7.99812	-9.1341
	463.2	106	19.3387	8.03558	-2.6645
	467.4	107	23.8705	8.06179	1.6852
	471.5	108	29.2154	8.19448	6.852
	473.5	109	25.2177	8.14799	2.7674
	475.4	110	24.5621	8.3609	2.0292
	477.4	111	22.0138	8.1729	-0.6061
	479.4	112	24.7847	8.22221	2.0777
	485	113	27.8838	8.66992	4.9327
	490.6	114	24.0577	8.45862	0.862
	496.2	115	20.0152	8.35346	-3.4255
	501.9	116	25.9611	8.33537	2.2704
	512.6	117	26.893	9.20869	2.7317
	523.4	118	30.9995	8.8993	6.3611
	534.2	119	19.6659	9.00282	-5.4519
	544.9	120	29.8338	8.63086	4.2389
	553.2	121	30.438	8.57323	4.4713
	561.6	122	24.8637	8.53236	-1.4807
	569.9	123	31.1693	8.5745	4.4502
	578.2	124	38.185	8.55245	11.0897
	587.4	125	32.2079	8.85817	4.6939
	596.6	126	26.6914	8.84161	-1.2431
	1530.4	136	22.1498	8.16064	-1.7566
	1541.2	137	27.1391	8.31596	3.43
	1552	138	18.8158	8.34459	-4.6928
	1562.8	139	26.945	8.50749	3.6331
	1573.6	140	34.7232	8.53533	11.6063
	1583	141	36.3016	8.30176	13.353
	1592.5	142	30.5393	8.31717	7.7594
	1601.9	143	19.7869	8.13028	-2.8274
	1611.3	144	14.6008	8.10404	-7.8493
	1622.5	145	22.9938	8.18638	0.7375
	1633.6	146	25.3868	8.70097	3.3206
	1644.8	147	21.3311	8.83088	-0.5453
	1656	148	23.2432	8.36712	1.5546
	1687.9	149	23.8358	8.46518	2.6707
	1719.8	150	22.0328	8.79201	1.3744
	1751.7	151	17.3722	8.65487	-2.7958
	1783.6	152	13.1268	8.30285	-6.566
	1804.1	153	21.4812	8.66158	2.0865
	1824.7	154	25.125	8.81413	6.0251
	1845.2	155	24.9562	8.98836	6.1458
	1865.7	156	24.2201	8.53944	5.6969
	1872	157	23.8637	9.17214	5.4285
	1878.3	158	27.3114	8.75573	8.9644
	1884.5	159	22.0641	8.87537	3.804
	1890.8	160	24.7082	8.6993	6.5365
	1897.3	161	15.6357	8.70214	-2.4443
	1903.7	162	19.507	8.79304	1.5177
	1910.1	163	15.5372	8.21934	-2.3608
	1916.5	164	11.2658	8.09093	-6.5402
	1925.5	165	11.4905	8.12341	-6.1846
	1934.4	166	15.4811	8.04083	-2.0628
	1943.3	167	16.7083	8.12323	-0.7023
	1952.3	168	16.4629	8.04587	-0.8109
	1958.1	169	16.7497	8.04968	-0.435
	1964	170	13.2714	8.03572	-3.8222
	1969.9	171	11.6787	8.04071	-5.3236
	1975.7	172	7.19377	8.02012	-9.7193
	1981.5	173	11.1218	8.07279	-5.7031
	1987.2	174	11.658	8.02013	-5.0824
	1992.9	175	8.25836	8.03165	-8.4009
	1998.7	176	8.37905	8.05918	-8.2025
	2003.3	177	9.76093	8.13611	-6.7637
	2008	178	9.10328	8.16736	-7.3685
	2012.6	179	10.9411	8.0568	-5.4853
	2017.2	180	7.19377	8.02012	-9.1941
	2019.8	181	8.26091	8.03898	-8.1086
	2022.3	182	14.0434	8.04943	-2.3442
	2024.8	183	12.4644	8.07081	-3.9537
	2027.3	184	13.1999	8.08419	-3.2502
	2029.3	185	13.6816	8.05066	-2.7953
	2031.2	186	14.8214	8.35746	-1.6818
	2033.2	187	14.9743	8.2558	-1.5575
	2035.1	188	13.668	8.23398	-2.8917
	2037.6	189	15.5067	8.35027	-1.091
	2040.2	190	12.3599	8.16128	-4.2785
	2042.7	191	15.7377	8.08017	-0.941
	2045.2	192	17.3747	8.04636	0.6547
	2056.8	193	12.8687	8.07766	-4.0542
	2068.3	194	9.67106	8.12346	-7.466
	2079.9	195	14.124	8.20504	-3.2367
	2091.4	196	15.9673	8.29576	-1.6191
	2093.6	197	17.0062	8.14619	-0.6236
	2095.7	198	11.9814	8.22977	-5.6899
	2097.8	199	9.81001	8.03678	-7.9029
	2099.9	200	9.98941	8.14123	-7.7651
	2109.8	201	14.0181	8.02856	-3.9328
	2119.7	202	23.0652	8.42438	4.9176
	2129.6	203	20.066	8.59528	1.7216
	2139.5	204	20.6365	8.85199	2.0953
	2143.2	205	25.4643	8.12061	6.8496
	2146.8	206	18.39	8.23499	-0.2964
	2150.5	207	16.1841	8.2557	-2.5759
	2154.2	208	15.3616	8.08322	-3.472
	2159.2	209	13.858	8.41376	-5.0752
	2164.2	210	18.9253	8.64723	-0.1076
	2169.2	211	12.9363	8.69375	-6.1964
	2174.2	212	15.2314	8.2047	-4.0013
	2175.7	213	17.569	8.80025	-1.6937
	2177.2	214	20.6088	8.72019	1.3161
	2178.7	215	17.6021	9.02054	-1.7206
	2180.2	216	17.0292	8.42561	-2.3236
	2188	217	17.201	8.26715	-2.3084
	2195.9	218	16.8146	8.08124	-2.8539
	2203.7	219	13.9425	8.08753	-5.8838
	2211.6	220	12.0561	8.36192	-7.9307
	2215.9	221	12.6755	8.6465	-7.3989
	2220.1	222	12.2669	8.81336	-7.8934
	2224.4	223	17.302	8.71447	-2.9465
	2228.7	224	12.6281	9.28797	-7.7089
	2233.9	225	18.5009	8.68932	-1.9435
	2239	226	11.4546	8.68278	-9.0955
	2244.2	227	19.6655	9.24753	-0.9929
	2249.4	228	19.2207	8.91898	-1.5465
	2258.9	229	16.275	8.2015	-4.6922
	2268.4	230	22.6131	8.85887	1.4441
	2277.8	231	25.8124	8.39504	4.4418
	2287.3	232	27.7265	8.40775	6.1502
	2290.6	233	30.7869	8.21438	9.1387
	2294	234	32.0388	8.24112	10.3162
	2297.3	235	32.3855	8.42791	10.5905
	2300.6	236	27.0479	8.67048	5.1802
	2311.9	237	30.0497	8.23641	7.9311
	2323.2	238	26.7331	8.26892	4.3607
	2334.6	239	24.8987	8.2465	2.2672
	2345.9	240	26.6722	8.24421	3.7809
	2350.7	241	32.5221	8.25272	9.5196
	2355.6	242	36.7838	8.3162	13.6673
	2360.4	243	30.7739	8.39964	7.5451
	2365.3	244	36.8571	8.18707	13.5132
	2385.8	245	36.512	8.33121	12.6812
	2406.2	246	27.9707	8.0477	3.6474
	2426.7	247	28.7861	8.14494	3.9609
	2447.2	248	36.452	8.42174	11.1192
	2451.2	249	33.6468	8.52657	8.2144
	2455.2	250	30.8448	8.39079	5.3126
	2459.2	251	36.247	8.48863	10.6148
	2463.2	252	20.5569	8.18192	-5.1754
	2470	253	27.6272	8.22495	1.7244
	2476.7	254	16.4907	8.04247	-9.5804
	2483.5	255	22.4017	8.1084	-3.8405
	2490.2	256	18.9506	8.05639	-7.4604
	2496.9	257	9.73011	7.99298	-16.8499
	2503.7	258	16.2075	8.02	-10.5442
	2510.4	259	13.4282	8.00023	-13.4928

## Sheet: C_Minden
YearCE	CalYrBP	depth_cm	Water-table depth (cm)	WTD_error
2000.9	-50.9	0.5	6.21827	8.01065
1984.9	-34.9	1.5	12.1835	8.02443
1968.8	-18.8	2.5	11.6002	8.02644
1952.8	-2.8	3.5	15.065	8.05037
1936.7	13.3	4.5	36.0196	8.16465
1920.6	29.4	5.5	41.4407	8.19007
1906.6	43.4	6.5	44.1655	8.29954
1892.5	57.5	7.5	42.0855	8.24379
1878.4	71.6	8.5	46.411	8.22523
1864.3	85.7	9.5	37.2251	8.31022
1850.2	99.8	10.5	33.913	8.62853
1808.3	141.7	11.5	26.9787	9.02595
1766.3	183.7	12.5	31.8273	9.06229
1724.4	225.6	13.5	39.1425	8.41089
1682.5	267.5	14.5	36.4858	8.32807
1640.6	309.4	15.5	22.0578	8.00911
1559.7	390.3	16.5	19.9737	8.15938
1478.9	471.1	17.5	23.2475	8.14469
1398	552	18.5	28.9344	8.19492
1317.1	632.9	19.5	28.2797	8.04021
1236.3	713.7	20.5	31.8684	8.0256
1215.4	734.6	21.5	21.4236	8.31084
1194.4	755.6	22.5	38.0997	8.03871
1173.5	776.5	23.5	37.0635	8.03589
1152.5	797.5	24.5	25.303	8.02242
1131.6	818.4	25.5	17.1307	8.01442
1118	832	26.5	31.5291	8.21082
1104.3	845.7	27.5	29.3613	8.09985
1090.7	859.3	28.5	22.8182	8.56036
1077	873	29.5	19.1568	8.13506
1063.4	886.6	30.5	10.3728	8.57942
1044.9	905.1	31.5	15.2025	8.09819
1026.4	923.6	32.5	6.64479	8.16431
1007.9	942.1	33.5	19.9893	8.18518
989.4	960.6	34.5	27.1795	8.27064
970.9	979.1	35.5	34.8936	8.38306
958.8	991.2	36.5	11.2064	8.15198
946.7	1003.3	37.5	17.1049	8.03809
934.5	1015.5	38.5	21.7433	8.02787
922.4	1027.6	39.5	10.2866	8.02861
910.3	1039.7	40.5	8.96588	8.04474
894.3	1055.7	41.5	9.28032	8.02828
878.4	1071.6	42.5	5.09109	8.0552
862.5	1087.5	43.5	7.52275	8.01504
846.5	1103.5	44.5	8.28021	8.0246
830.6	1119.4	45.5	10.8494	7.99958
822.8	1127.2	46.5	6.62023	8.00822
814.9	1135.1	47.5	12.9464	7.98981
807.1	1142.9	48.5	10.4301	8.00677
799.3	1150.7	49.5	9.0473	8.00365
791.4	1158.6	50.5	11.2323	8.00931
785.3	1164.7	51.5	17.3508	8.02357
779.1	1170.9	52.5	11.9827	8.00645
773	1177	53.5	6.15539	7.9992
766.8	1183.2	54.5	7.52184	7.99658
760.6	1189.4	55.5	8.75623	8.00261
756	1194	56.5	10.0431	8.00798
751.3	1198.7	57.5	6.36254	8.00693
746.6	1203.4	58.5	3.80147	8.00694
741.9	1208.1	59.5	8.15208	8.00479
737.3	1212.7	60.5	7.22038	8.01327
726.2	1223.8	61.5	9.53592	8.00294
715.2	1234.8	62.5	7.17631	8.00434
704.1	1245.9	63.5	10.5714	8.00687
693.1	1256.9	64.5	5.26272	8.00929
682	1268	65.5	5.30811	8.00477
676.2	1273.8	66.5	7.21939	8.01051
670.5	1279.5	67.5	6.49014	8.00274
664.7	1285.3	68.5	4.47181	8.00079
658.9	1291.1	69.5	9.26614	8.00467
653.2	1296.8	70.5	7.96949	8.00418
649.5	1300.5	71.5	9.96379	7.99257
645.9	1304.1	72.5	8.49083	7.99636
642.2	1307.8	73.5	7.00862	8.00275
638.5	1311.5	74.5	3.37673	8.00275
634.9	1315.1	75.5	2.68876	7.99629
626.2	1323.8	76.5	7.01988	8.01188
617.4	1332.6	77.5	5.20338	8.01551
608.7	1341.3	78.5	7.86381	8.00785
599.9	1350.1	79.5	7.24343	7.99679
591.2	1358.8	80.5	6.65993	8.00771
582.9	1367.1	81.5	8.82645	7.9994
574.6	1375.4	82.5	9.39834	8.00887
566.3	1383.7	83.5	11.8292	8.00066
557.9	1392.1	84.5	9.46732	8.0023
549.6	1400.4	85.5	14.7173	8.01317
540.5	1409.5	86.5	7.59427	7.99911
531.4	1418.6	87.5	7.03053	8.00335
522.3	1427.7	88.5	14.4884	7.99548
513.3	1436.7	89.5	11.0562	7.9959
504.2	1445.8	90.5	11.8463	8.01074
500.7	1449.3	91.5	15.0435	8.00503
497.3	1452.7	92.5	14.9394	8.01171
493.8	1456.2	93.5	16.0221	8.0038
490.4	1459.6	94.5	16.1192	8.01554
487	1463	95.5	13.9575	8.00789
467.6	1482.4	96.5	18.3059	8.00305
448.2	1501.8	97.5	14.2879	8.00735
428.8	1521.2	98.5	18.2735	8.02801
409.4	1540.6	99.5	14.0803	8.00259
390.1	1559.9	100.5	10.8708	8.00469
376.6	1573.4	101.5	11.7782	7.99907
363.2	1586.8	102.5	12.482	8.02661
349.8	1600.2	103.5	14.4176	8.02569
336.4	1613.6	104.5	13.4179	8.01777
323	1627	105.5	9.95382	8.02895
309	1641	106.5	11.8474	8.04213
295.1	1654.9	107.5	14.2978	8.01572
281.2	1668.8	108.5	16.8149	8.0226
267.3	1682.7	109.5	14.487	8.03587
253.3	1696.7	110.5	12.2534	8.02833
242.8	1707.2	111.5	9.92434	8.00874
232.2	1717.8	112.5	11.8556	8.01587
221.7	1728.3	113.5	12.767	8.02004
211.2	1738.8	114.5	18.8645	8.34784
200.6	1749.4	115.5	10.362	8.03106
187.6	1762.4	116.5	22.3567	8.0162
174.7	1775.3	117.5	20.3548	8.04441
161.7	1788.3	118.5	25.1776	8.04506
148.7	1801.3	119.5	22.6202	8.01992
135.7	1814.3	120.5	13.0129	8.00706
127.7	1822.3	121.5	16.862	8.01443
119.7	1830.3	122.5	19.158	8.03156
111.7	1838.3	123.5	20.2589	8.02078
103.7	1846.3	124.5	34.5941	8.02877
95.7	1854.3	125.5	18.5519	8.02809
78.4	1871.6	126.5	16.7431	8.03633
61.1	1888.9	127.5	17.7609	8.07566
43.8	1906.2	128.5	38.0197	8.27781
26.4	1923.6	129.5	27.4234	8.16389
9.1	1940.9	130.5	29.3467	8.424
-28.7	1978.7	131.5	31.5733	8.49572
-66.6	2016.6	132.5	30.0479	8.35065
-104.4	2054.4	133.5	31.3957	8.03071
-142.2	2092.2	134.5	20.0739	8.05212
-180.1	2130.1	135.5	31.0038	8.03447
-192.7	2142.7	136.5	19.1211	8.10163
-205.2	2155.2	137.5	23.502	8.03412
-217.8	2167.8	138.5	28.0216	8.01911
-230.4	2180.4	139.5	29.005	8.03479
-243	2193	140.5	27.7323	8.06315
-264.5	2214.5	141.5	30.1507	8.03184
-285.9	2235.9	142.5	35.4411	8.06975
-307.4	2257.4	143.5	36.5143	8.04985
-328.9	2278.9	144.5	31.2157	8.06953
-350.4	2300.4	145.5	25.1597	8.03743
-376.2	2326.2	146.5	23.6103	8.00672
-402.1	2352.1	147.5	17.686	8.02507
-428	2378	148.5	23.6103	8.00672
-453.9	2403.9	149.5	33.4455	8.06281
-479.8	2429.8	150.5	28.7984	8.0358
-497.5	2447.5	151.5	27.8691	8.01922
-515.3	2465.3	152.5	32.9011	8.10438
-533	2483	153.5	19.2624	8.1102
-550.8	2500.8	154.5	29.5871	8.04517
-568.5	2518.5	155.5	17.5331	8.03275
-588.4	2538.4	156.5	14.3259	8.04013
-608.2	2558.2	157.5	17.1246	8.03433
-628	2578	158.5	18.6321	8.02158
-647.8	2597.8	159.5	14.9865	8.30288
-667.6	2617.6	160.5	21.8666	8.06422
-694.9	2644.9	161.5	14.1937	8.04352
-722.3	2672.3	162.5	12.6784	8.00734
-749.6	2699.6	163.5	16.573	8.02087
-777	2727	164.5	21.1384	8.11488
-804.3	2754.3	165.5	28.5894	8.08279
-822.6	2772.6	166.5	28.2779	8.73784
-840.9	2790.9	167.5	40.8262	8.29645
-859.2	2809.2	168.5	35.85	8.64381
-877.5	2827.5	169.5	36.6377	8.58382
-895.8	2845.8	170.5	31.5414	8.42805
-916.4	2866.4	171.5	29.4228	8.09756
-937.1	2887.1	172.5	27.5238	8.05983
-957.7	2907.7	173.5	25.949	8.02508
-978.4	2928.4	174.5	30.2352	8.01722
-999	2949	175.5	29.5878	8.04435
-1020.3	2970.3	176.5	28.7301	8.05997
-1041.5	2991.5	177.5	32.7694	8.12563
-1062.8	3012.8	178.5	33.4464	8.39179
-1084	3034	179.5	17.206	8.02204
-1105.2	3055.2	180.5	26.8551	8.03607

## Sheet: C_GreatHeath
YearCE	CalYrBP	Water-table depth (cm)	WTD_detrended	WTD_error
1959.9	-9.9	18.2076	4.7652	8.5301
1930.9	19.1	14.5902	0.8678	9.0678
1901.8	48.2	14.9852	0.981	8.6624
1872.8	77.2	11.6286	-2.6568	9.0597
1843.7	106.3	6.6009	-7.9667	9.4824
1814.7	135.3	10.6764	-4.1721	9.076
1812	138	9.3977	-5.4769	9.238
1809.4	140.6	13.3487	-1.5511	8.7774
1806.7	143.3	15.3944	0.4685	8.936
1804.1	145.9	13.0923	-1.8588	8.8597
1801.5	148.5	14.2823	-0.694	8.7441
1797.8	152.2	14.6773	-0.3348	8.3558
1794.2	155.8	13.2846	-1.7624	8.884
1790.5	159.5	19.3371	4.2543	8.5473
1786.9	163.1	26.6963	11.5786	8.7891
1783.3	166.7	15.2001	0.0476	9.0859
1779.3	170.7	14.5249	-0.6664	8.6349
1775.3	174.7	24.449	9.2189	8.5884
1771.3	178.7	12.514	-2.7548	9.3504
1767.3	182.7	12.5253	-2.7823	9.1556
1763.4	186.6	18.0008	2.6553	8.6033
1746.3	203.7	15.1316	-0.3799	8.5558
1729.2	220.8	18.6431	2.9653	8.5338
1712.2	237.8	15.0094	-0.8338	8.1514
1695.1	254.9	16.7649	0.755	8.3401
1678.1	271.9	13.2893	-2.8864	8.4052
1662.3	287.7	14.2417	-2.0883	8.2691
1646.6	303.4	20.8303	4.3469	8.4274
1630.8	319.2	21.1961	4.5582	8.7081
1615.1	334.9	19.3574	2.5658	9.3478
1599.3	350.7	13.9043	-3.0419	8.8986
1590.6	359.4	17.0766	0.0453	8.6446
1581.8	368.2	18.4901	1.3727	9.1068
1573.1	376.9	15.6866	-1.5158	8.857
1564.4	385.6	10.35	-6.9373	8.7453
1555.6	394.4	16.4438	-0.9292	8.5356
1553.4	396.6	15.3008	-2.0936	8.1498
1551.1	398.9	16.9104	-0.5064	8.1169
1548.9	401.1	15.4171	-2.0211	8.1381
1546.6	403.4	15.2055	-2.255	8.1192
1544.4	405.6	13.6168	-3.865	8.1262
1530.6	419.4	17.2836	-0.3318	8.1187
1516.9	433.1	16.5963	-1.1511	8.1191
1503.1	446.9	18.0354	0.156	8.1354
1489.3	460.7	18.1549	0.1446	8.1794
1475.6	474.4	20.526	2.3875	8.1335
1466.8	483.2	17.5245	-0.6898	8.1478
1458.1	491.9	20.6907	2.4351	8.1707
1449.3	500.7	18.5971	0.306	8.1462
1440.6	509.4	20.8832	2.5602	8.5605
1431.9	518.1	16.6425	-1.7099	8.3286
1423.9	526.1	13.8107	-4.5678	8.3831
1415.9	534.1	12.6618	-5.7428	8.4584
1408	542	18.9392	0.5084	8.726
1400	550	18.6233	0.1654	8.7813
1392.1	557.9	30.0981	11.6126	8.8222
1381.7	568.3	29.1629	10.6399	8.524
1371.3	578.7	22.5881	4.0261	8.6121
1361	589	18.8707	0.2689	8.459
1350.6	599.4	19.7717	1.1287	8.8793
1340.2	609.8	22.002	3.3169	8.3804
1329.5	620.5	19.8128	1.0835	8.2294
1318.8	631.2	17.3284	-1.4456	8.24
1308.1	641.9	23.7321	4.9129	8.3957
1297.4	652.6	25.5712	6.7065	8.8009
1286.7	663.3	17.294	-1.6164	10.0761
1258.6	691.4	16.5255	-2.5053	9.5791
1230.4	719.6	17.2891	-1.8616	9.4065
1202.3	747.7	16.2349	-3.0334	8.7064
1174.1	775.9	16.3764	-3.0072	8.6523
1146	804	21.7817	2.2863	9.2373
1143.7	806.3	15.5883	-3.9161	9.1817
1141.5	808.5	23.9418	4.4288	8.3245
1139.2	810.8	24.2863	4.7643	8.2821
1136.9	813.1	19.8846	0.3537	8.9181
1134.7	815.3	15.4565	-4.083	9.7155
1120.8	829.2	27.729	8.1361	8.5005
1106.9	843.1	20.4068	0.7614	9.4207
1093	857	25.8897	6.1927	9.2547
1079.1	870.9	20.4159	0.6683	8.8064
1065.2	884.8	14.6922	-5.1049	9.1772
1052.4	897.6	11.6901	-8.1515	8.8626
1039.7	910.3	19.1832	-0.7016	8.7334
1026.9	923.1	13.4018	-6.5254	8.5611
1014.1	935.9	13.4205	-6.5482	9.7416
1001.3	948.7	17.6582	-2.3509	8.8937
996.3	953.7	20.3942	0.3696	8.6215
991.3	958.7	20.996	0.956	8.2301
986.3	963.7	20.8688	0.8136	8.2077
981.3	968.7	19.6757	-0.3946	8.479
976.3	973.7	23.7991	3.7138	8.5051

[truncated: 7 more sheets: C_Sidney, D_Nichols great heath, D_Nichols_TGH_locfit200, E_Zicheng WL-IRMs, F_LLrecons_NewEngland_050415, F_Matthews, F_Whitehead]
