# Supplementary material for: Climatic history of the northeastern United States during the past 3000 years
Source: Copernicus journal article supplement (doi:10.5194/cp-2016-104), 2016-11-02
Supplement: Supplementary file 2 [file fig_temps_AllData_10Oct2016.xlsx]

## Sheet: README
README
These data are from:
Marlon, J.R., Pederson, N., Nolan, C., Goring, S., Shuman, B., Booth, R., Bartlein, P.J., Berke, M.A., Clifford, M., Cook, E., Dieffenbacher-Krall, A., Dietze, M.C., Hessl, A., Hubeny, J.B., Jackson, S.T., Marsicek, J., McLachlan, J., Mock, C.J., Moore, D.J.P, Nichols, J., Robertson, A., Schaefer, K., Trouet, V., Umbanhowar, C., Williams, J.W., and Yu, Z. (2016) Climatic history of the northeaste…
TAB	FIGURE
A_ScotianMargin	(A) Scotian Margin alkenone SST (Sachs et al., 2007)
B_EmeraldBasin	(B) Emerald Basin alkenone SST (Keigwin et al., 2003)
C_Esper_locfit	(C) Extratropical Northern Hemisphere tree-ring data (Esper et al., 2002)
C_Esper_rcs	(C) Extratropical Northern Hemisphere tree-ring data (Esper et al., 2002)
D_Ljungq2010_low100_boot	(D) NE US multiple proxies (Mann et al., 2009)
D_Ljungq2010	(D) NE US multiple proxies (Mann et al., 2009)
NOAA NCDC: ftp://ftp.ncdc.noaa.gov/pub/data/paleo/pages2k/trouet2013nam480pollen.txt	(E) North American tree ring data (Trouet et al., 2013)
NOAA NCDC: ftp://ftp.ncdc.noaa.gov/pub/data/paleo/pages2k/trouet2013nam480pollen.txt	(F) North American pollen data (Trouet et al., 2013)
G_lme_full10_aave_EAST_NCUS	(G) CESM-LME northcentral and northeastern US simulations (Otto-Bliesner et al., 2015)
NOAA NCDC: https://www.ncdc.noaa.gov/data-access/paleoclimatology-data/datasets/pollen	(H) North American pollen data (Viau et al., 2006)
I_PollenRecon-NENC-100to70long	(I) Northeastern US pollen data (Williams et al., 2011)
I-input_PollenRecon-NENC100to7	(I) Northeastern US pollen data (Williams et al., 2011)
J_Liu_Trace21ann_NCUS_tas_land_	(J) Northcentral and Northeastern US simulations (Liu et al., 2010)
J-input_Liu_Trace21ann_NCUS_tas	(J) Northcentral and Northeastern US simulations (Liu et al., 2010)
J_Liu_Trace21ann_EAST_tas_land_	(J) Northcentral and Northeastern US simulations (Liu et al., 2010)
J-input_Liu_Trace21ann_EAST_tas	(J) Northcentral and Northeastern US simulations (Liu et al., 2010)
For more information contact:
Jennifer R. Marlon
Email: jennifer.marlon@yale.edu

## Sheet: A_ScotianMargin
yearce	quant_raw	type	filename	units	proxytype	rquant	length
1950	8.57	T	ts_sst_scotianmargin.csv	SST	ts_sst	0.104918	long
1820	8.41	T	ts_sst_scotianmargin.csv	SST	ts_sst	0	long
1570	8.721	T	ts_sst_scotianmargin.csv	SST	ts_sst	0.203934	long
1510	8.8	T	ts_sst_scotianmargin.csv	SST	ts_sst	0.255738	long
1440	8.87	T	ts_sst_scotianmargin.csv	SST	ts_sst	0.301639	long
1360	8.859	T	ts_sst_scotianmargin.csv	SST	ts_sst	0.294426	long
1250	8.881	T	ts_sst_scotianmargin.csv	SST	ts_sst	0.308852	long
1150	9.055	T	ts_sst_scotianmargin.csv	SST	ts_sst	0.422951	long
1040	9.18	T	ts_sst_scotianmargin.csv	SST	ts_sst	0.504918	long
930	9.262	T	ts_sst_scotianmargin.csv	SST	ts_sst	0.558689	long
830	9.485	T	ts_sst_scotianmargin.csv	SST	ts_sst	0.704918	long
720	9.629	T	ts_sst_scotianmargin.csv	SST	ts_sst	0.799344	long
620	9.761	T	ts_sst_scotianmargin.csv	SST	ts_sst	0.885902	long
510	9.015	T	ts_sst_scotianmargin.csv	SST	ts_sst	0.396721	long
400	9.682	T	ts_sst_scotianmargin.csv	SST	ts_sst	0.834098	long
310	9.584	T	ts_sst_scotianmargin.csv	SST	ts_sst	0.769836	long
240	9.539	T	ts_sst_scotianmargin.csv	SST	ts_sst	0.740328	long
160	9.75	T	ts_sst_scotianmargin.csv	SST	ts_sst	0.878689	long
80	9.791	T	ts_sst_scotianmargin.csv	SST	ts_sst	0.905574	long
0	9.935	T	ts_sst_scotianmargin.csv	SST	ts_sst	1	long

## Sheet: B_EmeraldBasin
yearce	quant_raw	type	filename	units	proxytype	rquant	length
1950	8.84	T	ts_sst_emeraldbasin.csv	SST	ts_sst	0.310734	long
1942.06	8.6	T	ts_sst_emeraldbasin.csv	SST	ts_sst	0.175141	long
1934.12	9.32	T	ts_sst_emeraldbasin.csv	SST	ts_sst	0.581921	long
1926.19	9.99	T	ts_sst_emeraldbasin.csv	SST	ts_sst	0.960452	long
1918.25	9.78	T	ts_sst_emeraldbasin.csv	SST	ts_sst	0.841808	long
1910.31	9.88	T	ts_sst_emeraldbasin.csv	SST	ts_sst	0.898305	long
1902.38	10.06	T	ts_sst_emeraldbasin.csv	SST	ts_sst	1	long
1894.44	9.73	T	ts_sst_emeraldbasin.csv	SST	ts_sst	0.813559	long
1886.5	9.98	T	ts_sst_emeraldbasin.csv	SST	ts_sst	0.954802	long
1878.56	9.36	T	ts_sst_emeraldbasin.csv	SST	ts_sst	0.60452	long
1870.62	8.43	T	ts_sst_emeraldbasin.csv	SST	ts_sst	0.079096	long
1862.69	8.37	T	ts_sst_emeraldbasin.csv	SST	ts_sst	0.0451977	long
1854.75	8.37	T	ts_sst_emeraldbasin.csv	SST	ts_sst	0.0451977	long
1846.81	8.38	T	ts_sst_emeraldbasin.csv	SST	ts_sst	0.0508475	long
1838.88	8.29	T	ts_sst_emeraldbasin.csv	SST	ts_sst	0	long
1830.94	8.81	T	ts_sst_emeraldbasin.csv	SST	ts_sst	0.293785	long
1823	8.49	T	ts_sst_emeraldbasin.csv	SST	ts_sst	0.112994	long
1791.23	8.7	T	ts_sst_emeraldbasin.csv	SST	ts_sst	0.231638	long
1759.46	8.52	T	ts_sst_emeraldbasin.csv	SST	ts_sst	0.129944	long
1727.69	8.58	T	ts_sst_emeraldbasin.csv	SST	ts_sst	0.163842	long
1695.92	8.87	T	ts_sst_emeraldbasin.csv	SST	ts_sst	0.327684	long
1664.15	9.04	T	ts_sst_emeraldbasin.csv	SST	ts_sst	0.423729	long
1632.38	8.82	T	ts_sst_emeraldbasin.csv	SST	ts_sst	0.299435	long
1600.62	8.47	T	ts_sst_emeraldbasin.csv	SST	ts_sst	0.101695	long
1568.85	8.74	T	ts_sst_emeraldbasin.csv	SST	ts_sst	0.254237	long
1537.08	8.85	T	ts_sst_emeraldbasin.csv	SST	ts_sst	0.316384	long
1505.31	8.9	T	ts_sst_emeraldbasin.csv	SST	ts_sst	0.344633	long
1473.54	8.94	T	ts_sst_emeraldbasin.csv	SST	ts_sst	0.367232	long
1441.77	8.83	T	ts_sst_emeraldbasin.csv	SST	ts_sst	0.305085	long
1410	9.01	T	ts_sst_emeraldbasin.csv	SST	ts_sst	0.40678	long
1357.05	9.08	T	ts_sst_emeraldbasin.csv	SST	ts_sst	0.446328	long
1304.1	8.94	T	ts_sst_emeraldbasin.csv	SST	ts_sst	0.367232	long
1251.15	8.82	T	ts_sst_emeraldbasin.csv	SST	ts_sst	0.299435	long
1198.2	8.99	T	ts_sst_emeraldbasin.csv	SST	ts_sst	0.39548	long
1145.25	9.1	T	ts_sst_emeraldbasin.csv	SST	ts_sst	0.457627	long
1092.3	9	T	ts_sst_emeraldbasin.csv	SST	ts_sst	0.40113	long
1039.35	8.85	T	ts_sst_emeraldbasin.csv	SST	ts_sst	0.316384	long
986.4	9.02	T	ts_sst_emeraldbasin.csv	SST	ts_sst	0.412429	long
933.45	9.05	T	ts_sst_emeraldbasin.csv	SST	ts_sst	0.429379	long
880.5	9.02	T	ts_sst_emeraldbasin.csv	SST	ts_sst	0.412429	long
827.55	8.85	T	ts_sst_emeraldbasin.csv	SST	ts_sst	0.316384	long
774.6	9.03	T	ts_sst_emeraldbasin.csv	SST	ts_sst	0.418079	long
721.65	9.11	T	ts_sst_emeraldbasin.csv	SST	ts_sst	0.463277	long
668.7	9.13	T	ts_sst_emeraldbasin.csv	SST	ts_sst	0.474576	long
615.75	8.79	T	ts_sst_emeraldbasin.csv	SST	ts_sst	0.282486	long
562.8	9.14	T	ts_sst_emeraldbasin.csv	SST	ts_sst	0.480226	long
509.85	9.16	T	ts_sst_emeraldbasin.csv	SST	ts_sst	0.491525	long
456.9	9.1	T	ts_sst_emeraldbasin.csv	SST	ts_sst	0.457627	long
403.95	9.03	T	ts_sst_emeraldbasin.csv	SST	ts_sst	0.418079	long
351	9.19	T	ts_sst_emeraldbasin.csv	SST	ts_sst	0.508475	long

## Sheet: C_Esper_locfit
yearce	pred01.fit
831	1.01106
836	0.998976
841	0.990081
846	0.984617
851	0.982826
856	0.98495
861	0.991232
866	1.00191
871	1.01516
876	1.02588
881	1.03374
886	1.03867
891	1.04061
896	1.03946
901	1.03517
906	1.028
911	1.02051
916	1.01398
921	1.00938
926	1.00765
931	1.00973
936	1.0166
941	1.02904
946	1.04428
951	1.06068
956	1.07802
961	1.09607
966	1.1146
971	1.13338
976	1.15218
981	1.16889
986	1.18142
991	1.18989
996	1.19442
1001	1.19513
1006	1.19213
1011	1.18555
1016	1.17592
1021	1.16462
1026	1.15208
1031	1.13871
1036	1.12488
1041	1.11098
1046	1.0974
1051	1.08496
1056	1.07656
1061	1.07189
1066	1.07
1071	1.06993
1076	1.07071
1081	1.0714
1086	1.07096
1091	1.06635
1096	1.05717
1101	1.04444
1106	1.02917
1111	1.01236
1116	0.995022
1121	0.978169
1126	0.964551
1131	0.956107
1136	0.951978
1141	0.951304
1146	0.953222
1151	0.956868
1156	0.961381
1161	0.96516
1166	0.96572
1171	0.963226
1176	0.958006
1181	0.950386
1186	0.940693
1191	0.929254
1196	0.916663
1201	0.905181
1206	0.8952
1211	0.886654
1216	0.879473
1221	0.87359
1226	0.868937
1231	0.865432
1236	0.862469
1241	0.85978
1246	0.857398
1251	0.855355
1256	0.853683
1261	0.852417
1266	0.851588
1271	0.851934
1276	0.854354
1281	0.858763
1286	0.865071
1291	0.873189
1296	0.883029
1301	0.894501
1306	0.906349
1311	0.914872
1316	0.920019
1321	0.922031
1326	0.92115
1331	0.917615
1336	0.911669
1341	0.903949
1346	0.898074
1351	0.894861
1356	0.894309
1361	0.896414
1366	0.901176
1371	0.908594
1376	0.918612
1381	0.92865
1386	0.937513
1391	0.945543
1396	0.953087
1401	0.960487
1406	0.968087
1411	0.976233
1416	0.983235
1421	0.986471
1426	0.986245
1431	0.982889
1436	0.976734
1441	0.96811
1446	0.957348
1451	0.945513
1456	0.935677
1461	0.928751
1466	0.925426
1471	0.926397
1476	0.932354
1481	0.943992
1486	0.961345
1491	0.978425
1496	0.993608
1501	1.00687
1506	1.01819
1511	1.02754
1516	1.0349
1521	1.04026
1526	1.04459
1531	1.04823
1536	1.0508
1541	1.05193
1546	1.05123
1551	1.04835
1556	1.0429
1561	1.03437
1566	1.02263
1571	1.00799
1576	0.990807
1581	0.971429
1586	0.950197
1591	0.927459
1596	0.9044
1601	0.884545
1606	0.868422
1611	0.856235
1616	0.848189
1621	0.844489
1626	0.845339
1631	0.850773
1636	0.858878
1641	0.868741
1646	0.87994
1651	0.892052
1656	0.904654
1661	0.917324
1666	0.929627
1671	0.93991
1676	0.947593
1681	0.95317
1686	0.957132
1691	0.959972
1696	0.962184
1701	0.964259
1706	0.966296
1711	0.967971
1716	0.969533
1721	0.971242
1726	0.973358
1731	0.97614
1736	0.97985
1741	0.984483
1746	0.989082
1751	0.993538
1756	0.997857
1761	1.00205
1766	1.00612
1771	1.01007
1776	1.01366
1781	1.01393
1786	1.01064
1791	1.00454
1796	0.996407
1801	0.987015
1806	0.977131
1811	0.967534
1816	0.960154
1821	0.955991
1826	0.954949
1831	0.956931
1836	0.961843
1841	0.969586
1846	0.980066
1851	0.991891
1856	1.00263
1861	1.01236
1866	1.02117
1871	1.02921
1876	1.03658
1881	1.04341
1886	1.05017
1891	1.0585
1896	1.06851
1901	1.08008
1906	1.0931
1911	1.10747
1916	1.12307
1921	1.13969
1926	1.15565
1931	1.17027
1936	1.1834
1941	1.19487
1946	1.20452
1951	1.21218
1956	1.21771
1961	1.22163
1966	1.22466
1971	1.22711
1976	1.22927
1981	1.23144
1986	1.23392
1991	1.237

## Sheet: C_Esper_rcs
YEAR R	CS_BAND(COS) 2.5%	0.975	BAND(COS)_20SPL		0.025	97.5% BAND	(COS)_20	SPL_TMPS	2.5% 97.	5% BAND(	COS)_40	SPL 2.5%	97.5% B	AND(COS)_40SPL_TMPS 2.5% 97.5%
831	0.696	0.34	0.906	0.751	0.522	0.939	-1.198	-1.813	-0.725	0.885	0.681	1.135	-0.891	-1.443	-0.215
832	0.8	0.659	0.979	0.796	0.576	1.004	-1.08	-1.672	-0.555	0.902	0.699	1.156	-0.845	-1.395	-0.158
833	0.856	0.643	1.007	0.84	0.629	1.069	-0.966	-1.534	-0.386	0.919	0.717	1.176	-0.799	-1.346	-0.104
834	0.893	0.718	1.017	0.882	0.678	1.132	-0.856	-1.406	-0.221	0.936	0.734	1.196	-0.753	-1.3	-0.05
835	0.888	0.747	1.298	0.924	0.724	1.193	-0.746	-1.286	-0.062	0.953	0.75	1.215	-0.708	-1.257	0.001
836	0.935	0.758	1.181	0.964	0.766	1.25	-0.642	-1.176	0.086	0.969	0.766	1.233	-0.664	-1.214	0.05
837	0.981	0.785	1.322	1.001	0.804	1.302	-0.545	-1.077	0.222	0.983	0.78	1.25	-0.626	-1.176	0.096
838	1.015	0.859	1.27	1.036	0.837	1.345	-0.454	-0.991	0.334	0.997	0.793	1.264	-0.589	-1.14	0.134
839	1.013	0.73	1.502	1.066	0.866	1.379	-0.376	-0.915	0.423	1.009	0.803	1.276	-0.556	-1.113	0.166
840	1.166	0.934	1.722	1.091	0.888	1.402	-0.311	-0.858	0.483	1.019	0.812	1.286	-0.529	-1.089	0.193
841	1.222	0.934	1.449	1.108	0.904	1.412	-0.266	-0.816	0.509	1.026	0.818	1.292	-0.51	-1.073	0.21
842	1.249	1.136	1.438	1.118	0.912	1.411	-0.24	-0.795	0.507	1.031	0.822	1.295	-0.496	-1.062	0.218
843	1.216	1.058	1.406	1.12	0.911	1.401	-0.235	-0.798	0.481	1.034	0.822	1.295	-0.488	-1.062	0.218
844	1.134	0.903	1.445	1.115	0.903	1.384	-0.248	-0.819	0.436	1.034	0.821	1.292	-0.488	-1.065	0.21
845	1.02	0.839	1.279	1.105	0.89	1.363	-0.274	-0.853	0.381	1.033	0.816	1.287	-0.491	-1.078	0.196
846	0.996	0.815	1.157	1.094	0.875	1.341	-0.303	-0.892	0.324	1.029	0.809	1.28	-0.502	-1.097	0.177
847	0.9	0.527	1.17	1.081	0.86	1.319	-0.337	-0.931	0.266	1.023	0.801	1.271	-0.518	-1.119	0.153
848	0.986	0.707	1.166	1.068	0.846	1.3	-0.371	-0.968	0.217	1.015	0.79	1.26	-0.54	-1.148	0.123
849	1.13	0.94	1.43	1.055	0.831	1.281	-0.405	-1.007	0.167	1.006	0.777	1.248	-0.564	-1.184	0.09
850	1.174	0.987	1.299	1.038	0.815	1.26	-0.449	-1.048	0.113	0.996	0.763	1.235	-0.591	-1.222	0.055
851	1.132	0.859	1.322	1.018	0.794	1.238	-0.501	-1.103	0.055	0.984	0.748	1.221	-0.624	-1.262	0.018
852	0.934	0.689	1.304	0.995	0.768	1.213	-0.561	-1.171	-0.01	0.971	0.731	1.206	-0.659	-1.308	-0.023
853	1.142	1.021	1.33	0.968	0.737	1.185	-0.632	-1.252	-0.083	0.958	0.713	1.191	-0.694	-1.357	-0.064
854	0.809	0.616	0.94	0.94	0.703	1.157	-0.705	-1.341	-0.156	0.944	0.694	1.177	-0.732	-1.408	-0.101
855	0.825	0.733	0.971	0.913	0.666	1.131	-0.775	-1.437	-0.224	0.931	0.676	1.162	-0.767	-1.457	-0.142
856	0.961	0.719	1.336	0.886	0.628	1.106	-0.845	-1.536	-0.289	0.919	0.658	1.149	-0.799	-1.506	-0.177
857	0.851	0.424	1.014	0.862	0.592	1.083	-0.908	-1.63	-0.349	0.907	0.64	1.138	-0.832	-1.554	-0.207
858	0.783	0.415	1.076	0.84	0.561	1.062	-0.966	-1.711	-0.404	0.896	0.624	1.128	-0.862	-1.598	-0.234
859	0.825	0.499	1.01	0.822	0.535	1.044	-1.013	-1.779	-0.451	0.888	0.609	1.12	-0.883	-1.638	-0.256
860	0.766	0.497	0.988	0.808	0.516	1.03	-1.049	-1.829	-0.488	0.881	0.597	1.114	-0.902	-1.671	-0.272
861	0.744	0.464	1.061	0.798	0.502	1.021	-1.075	-1.865	-0.511	0.876	0.587	1.11	-0.916	-1.698	-0.283
862	0.897	0.514	1.084	0.792	0.494	1.015	-1.091	-1.886	-0.527	0.873	0.579	1.109	-0.924	-1.719	-0.285
863	0.833	0.552	1.014	0.79	0.491	1.014	-1.096	-1.894	-0.529	0.872	0.573	1.111	-0.927	-1.736	-0.28
864	0.765	0.542	0.913	0.792	0.492	1.019	-1.091	-1.891	-0.516	0.874	0.57	1.115	-0.921	-1.744	-0.269
865	0.753	0.441	0.976	0.798	0.497	1.031	-1.075	-1.878	-0.485	0.878	0.569	1.122	-0.91	-1.746	-0.25
866	0.788	0.509	0.985	0.81	0.506	1.049	-1.044	-1.855	-0.438	0.884	0.571	1.131	-0.894	-1.741	-0.226
867	0.801	0.542	1.172	0.827	0.52	1.073	-0.999	-1.818	-0.375	0.893	0.575	1.143	-0.87	-1.73	-0.193
868	0.773	0.403	1.01	0.849	0.538	1.103	-0.942	-1.771	-0.297	0.904	0.581	1.157	-0.84	-1.714	-0.156
869	0.815	0.435	1.022	0.876	0.56	1.137	-0.872	-1.714	-0.208	0.916	0.59	1.172	-0.808	-1.69	-0.115
870	0.884	0.666	1.185	0.907	0.586	1.175	-0.791	-1.646	-0.109	0.93	0.6	1.189	-0.77	-1.663	-0.069
871	0.936	0.629	1.175	0.94	0.612	1.214	-0.705	-1.578	-0.007	0.945	0.612	1.207	-0.729	-1.63	-0.02
872	1.041	0.774	1.351	0.973	0.638	1.253	-0.618	-1.51	0.094	0.961	0.624	1.226	-0.686	-1.598	0.031
873	1.016	0.608	1.292	1.004	0.662	1.289	-0.538	-1.448	0.188	0.978	0.638	1.245	-0.64	-1.56	0.082
874	1.05	0.637	1.323	1.033	0.683	1.321	-0.462	-1.393	0.272	0.994	0.653	1.263	-0.597	-1.519	0.131
875	1.123	0.788	1.473	1.058	0.702	1.346	-0.397	-1.343	0.337	1.011	0.668	1.28	-0.551	-1.479	0.177
876	1.174	0.863	1.608	1.077	0.717	1.364	-0.347	-1.304	0.384	1.027	0.683	1.297	-0.507	-1.438	0.223
877	1.019	0.603	1.191	1.092	0.727	1.375	-0.308	-1.278	0.413	1.042	0.698	1.312	-0.467	-1.397	0.264
878	1.187	0.797	1.45	1.101	0.735	1.38	-0.285	-1.257	0.426	1.056	0.714	1.326	-0.429	-1.354	0.302
879	1.213	0.842	1.462	1.106	0.74	1.38	-0.271	-1.244	0.426	1.07	0.729	1.338	-0.391	-1.314	0.334
880	1.135	0.772	1.492	1.106	0.743	1.376	-0.271	-1.236	0.415	1.082	0.744	1.349	-0.359	-1.273	0.364
881	1.035	0.764	1.223	1.104	0.744	1.369	-0.277	-1.234	0.397	1.094	0.759	1.359	-0.326	-1.232	0.391
882	1.189	0.771	1.423	1.102	0.747	1.362	-0.282	-1.226	0.379	1.104	0.774	1.367	-0.299	-1.192	0.412
883	1.04	0.614	1.244	1.1	0.753	1.358	-0.287	-1.21	0.368	1.114	0.789	1.374	-0.272	-1.151	0.431
884	0.891	0.531	1.233	1.102	0.764	1.357	-0.282	-1.182	0.366	1.122	0.804	1.38	-0.25	-1.111	0.448
885	1.165	0.921	1.387	1.108	0.781	1.361	-0.266	-1.137	0.376	1.13	0.819	1.385	-0.229	-1.07	0.461
886	0.946	0.562	1.188	1.118	0.804	1.371	-0.24	-1.077	0.402	1.137	0.834	1.388	-0.21	-1.03	0.469
887	1.218	0.984	1.482	1.133	0.83	1.385	-0.201	-1.009	0.439	1.143	0.848	1.391	-0.193	-0.992	0.477
888	1.047	0.786	1.236	1.15	0.86	1.402	-0.157	-0.931	0.483	1.148	0.861	1.392	-0.18	-0.956	0.48
889	1.157	0.905	1.372	1.169	0.891	1.421	-0.107	-0.85	0.533	1.151	0.873	1.391	-0.172	-0.924	0.477
890	1.195	0.782	1.435	1.189	0.922	1.44	-0.055	-0.769	0.582	1.153	0.884	1.388	-0.167	-0.894	0.469
891	1.166	1.008	1.516	1.208	0.952	1.456	-0.005	-0.691	0.624	1.153	0.893	1.383	-0.167	-0.87	0.456
892	1.301	1.101	1.56	1.223	0.978	1.467	0.034	-0.623	0.653	1.151	0.9	1.376	-0.172	-0.851	0.437
893	1.211	0.998	1.53	1.233	0.998	1.47	0.06	-0.571	0.66	1.147	0.905	1.367	-0.183	-0.837	0.412
894	1.314	1.007	1.542	1.236	1.011	1.463	0.068	-0.537	0.642	1.141	0.907	1.355	-0.199	-0.832	0.38
895	1.405	1.219	1.65	1.23	1.015	1.445	0.052	-0.527	0.595	1.132	0.907	1.34	-0.223	-0.832	0.339
896	1.112	0.892	1.291	1.216	1.01	1.418	0.015	-0.54	0.525	1.121	0.904	1.323	-0.253	-0.84	0.293
897	1.352	1.128	1.539	1.193	0.996	1.381	-0.045	-0.576	0.428	1.109	0.899	1.305	-0.285	-0.854	0.245
898	1.302	1.109	1.386	1.161	0.973	1.337	-0.128	-0.636	0.313	1.094	0.891	1.284	-0.326	-0.875	0.188
899	1.165	0.939	1.435	1.123	0.943	1.287	-0.227	-0.715	0.183	1.078	0.881	1.263	-0.369	-0.902	0.131
900	1.027	0.92	1.095	1.079	0.908	1.235	-0.342	-0.806	0.047	1.061	0.87	1.241	-0.415	-0.932	0.072
901	1.033	0.924	1.186	1.034	0.869	1.183	-0.459	-0.908	-0.088	1.043	0.857	1.22	-0.464	-0.967	0.015
902	0.988	0.842	1.068	0.991	0.83	1.135	-0.572	-1.009	-0.214	1.025	0.844	1.199	-0.513	-1.002	-0.042
903	0.722	0.549	0.876	0.951	0.794	1.093	-0.676	-1.103	-0.323	1.008	0.831	1.179	-0.559	-1.038	-0.096
904	0.977	0.761	1.127	0.917	0.762	1.06	-0.765	-1.187	-0.409	0.993	0.818	1.161	-0.599	-1.073	-0.145
905	0.886	0.729	1.03	0.89	0.736	1.036	-0.835	-1.255	-0.472	0.978	0.806	1.146	-0.64	-1.105	-0.185
906	0.749	0.551	0.878	0.871	0.717	1.021	-0.885	-1.304	-0.511	0.965	0.794	1.132	-0.675	-1.138	-0.223
907	0.741	0.639	0.922	0.86	0.705	1.016	-0.913	-1.336	-0.524	0.954	0.784	1.121	-0.705	-1.165	-0.253
908	0.811	0.739	0.919	0.857	0.7	1.021	-0.921	-1.349	-0.511	0.946	0.775	1.112	-0.726	-1.189	-0.277
909	0.835	0.695	0.975	0.861	0.699	1.032	-0.911	-1.351	-0.482	0.939	0.768	1.106	-0.745	-1.208	-0.294
910	0.929	0.765	1.176	0.87	0.702	1.049	-0.887	-1.343	-0.438	0.934	0.762	1.102	-0.759	-1.224	-0.304
911	0.943	0.715	1.185	0.882	0.707	1.067	-0.856	-1.33	-0.391	0.931	0.758	1.1	-0.767	-1.235	-0.31
912	0.914	0.73	1.039	0.895	0.714	1.085	-0.822	-1.312	-0.344	0.93	0.755	1.1	-0.77	-1.243	-0.31
913	0.816	0.667	1.017	0.909	0.722	1.101	-0.785	-1.291	-0.302	0.93	0.753	1.102	-0.77	-1.249	-0.304
914	0.948	0.771	1.093	0.922	0.729	1.115	-0.752	-1.273	-0.266	0.932	0.752	1.104	-0.764	-1.251	-0.299
915	1.208	0.841	1.634	0.933	0.737	1.124	-0.723	-1.252	-0.242	0.934	0.753	1.108	-0.759	-1.249	-0.288
916	0.911	0.771	1.105	0.941	0.743	1.127	-0.702	-1.236	-0.234	0.938	0.755	1.113	-0.748	-1.243	-0.275
917	0.945	0.647	1.122	0.947	0.749	1.126	-0.686	-1.221	-0.237	0.942	0.757	1.118	-0.737	-1.238	-0.261
918	0.953	0.838	1.096	0.951	0.755	1.122	-0.676	-1.205	-0.248	0.947	0.76	1.125	-0.724	-1.23	-0.242
919	0.937	0.764	1.078	0.955	0.76	1.119	-0.665	-1.192	-0.255	0.953	0.764	1.132	-0.708	-1.219	-0.223
920	0.862	0.657	0.955	0.959	0.766	1.118	-0.655	-1.176	-0.258	0.96	0.769	1.14	-0.689	-1.205	-0.202
921	0.999	0.815	1.151	0.965	0.772	1.121	-0.639	-1.161	-0.25	0.967	0.774	1.15	-0.67	-1.192	-0.175
922	0.966	0.808	1.078	0.972	0.779	1.129	-0.621	-1.142	-0.229	0.974	0.78	1.16	-0.651	-1.176	-0.147
923	0.963	0.78	1.108	0.979	0.786	1.141	-0.603	-1.124	-0.198	0.982	0.786	1.17	-0.629	-1.159	-0.12
924	1.01	0.784	1.131	0.989	0.793	1.157	-0.577	-1.106	-0.156	0.99	0.793	1.181	-0.608	-1.14	-0.091
925	0.913	0.739	1.064	0.999	0.8	1.178	-0.551	-1.088	-0.101	0.998	0.799	1.193	-0.586	-1.124	-0.058
926	1.002	0.864	1.13	1.011	0.808	1.202	-0.519	-1.067	-0.039	1.006	0.806	1.204	-0.564	-1.105	-0.029
927	1.086	0.953	1.39	1.023	0.816	1.228	-0.488	-1.046	0.029	1.014	0.812	1.215	-0.543	-1.089	0.001
928	1.019	0.624	1.285	1.036	0.824	1.253	-0.454	-1.025	0.094	1.021	0.818	1.226	-0.524	-1.073	0.031
929	1.09	0.912	1.282	1.048	0.832	1.277	-0.423	-1.004	0.157	1.028	0.824	1.236	-0.505	-1.057	0.058
930	0.985	0.757	1.183	1.06	0.842	1.299	-0.391	-0.978	0.214	1.034	0.83	1.244	-0.488	-1.04	0.08
931	1.108	0.907	1.399	1.071	0.852	1.318	-0.363	-0.952	0.264	1.04	0.835	1.252	-0.472	-1.027	0.101
932	1.05	0.827	1.379	1.081	0.862	1.333	-0.337	-0.926	0.303	1.044	0.839	1.258	-0.461	-1.016	0.118
933	1.098	0.79	1.301	1.089	0.872	1.342	-0.316	-0.9	0.326	1.048	0.843	1.262	-0.451	-1.005	0.128
934	1.103	0.869	1.426	1.096	0.882	1.346	-0.298	-0.874	0.337	1.051	0.846	1.264	-0.442	-0.997	0.134
935	1.011	0.853	1.41	1.1	0.889	1.344	-0.287	-0.855	0.332	1.052	0.848	1.265	-0.44	-0.992	0.137
936	1.24	1.115	1.466	1.101	0.894	1.335	-0.285	-0.842	0.308	1.052	0.849	1.264	-0.44	-0.989	0.134
937	1.14	0.925	1.292	1.098	0.893	1.32	-0.292	-0.845	0.269	1.052	0.849	1.261	-0.44	-0.989	0.126
938	1.139	1.045	1.278	1.092	0.888	1.301	-0.308	-0.858	0.22	1.05	0.848	1.257	-0.445	-0.992	0.115
939	1.162	0.871	1.37	1.081	0.879	1.28	-0.337	-0.882	0.165	1.047	0.846	1.252	-0.453	-0.997	0.101
940	0.933	0.634	1.098	1.068	0.869	1.258	-0.371	-0.908	0.107	1.043	0.843	1.246	-0.464	-1.005	0.085
941	1.098	0.855	1.286	1.054	0.859	1.236	-0.407	-0.934	0.05	1.039	0.839	1.24	-0.475	-1.016	0.069
942	1	0.827	1.105	1.039	0.849	1.217	-0.446	-0.96	0	1.035	0.835	1.234	-0.486	-1.027	0.053
943	1.088	0.947	1.223	1.024	0.839	1.2	-0.486	-0.986	-0.044	1.03	0.831	1.228	-0.499	-1.038	0.036
944	0.959	0.759	1.077	1.01	0.829	1.186	-0.522	-1.012	-0.08	1.026	0.826	1.223	-0.51	-1.051	0.023
945	0.989	0.785	1.331	0.998	0.819	1.175	-0.553	-1.038	-0.109	1.021	0.822	1.218	-0.524	-1.062	0.009
946	0.997	0.902	1.16	0.988	0.81	1.168	-0.579	-1.061	-0.127	1.018	0.817	1.214	-0.532	-1.076	-0.001
947	0.874	0.681	1.006	0.981	0.801	1.163	-0.598	-1.085	-0.14	1.015	0.813	1.211	-0.54	-1.086	-0.01
948	0.928	0.828	1.174	0.976	0.792	1.162	-0.611	-1.109	-0.143	1.012	0.809	1.209	-0.548	-1.097	-0.015
949	1.021	0.885	1.167	0.975	0.784	1.165	-0.613	-1.129	-0.135	1.011	0.806	1.209	-0.551	-1.105	-0.015
950	0.926	0.746	1.085	0.976	0.775	1.17	-0.611	-1.153	-0.122	1.011	0.803	1.209	-0.551	-1.113	-0.015
951	1.056	0.855	1.247	0.978	0.767	1.177	-0.605	-1.174	-0.104	1.011	0.801	1.211	-0.551	-1.119	-0.01
952	0.962	0.615	1.147	0.981	0.76	1.184	-0.598	-1.192	-0.086	1.013	0.8	1.214	-0.545	-1.122	-0.001
953	1.09	0.793	1.446	0.984	0.756	1.19	-0.59	-1.202	-0.07	1.015	0.8	1.219	-0.54	-1.122	0.012
954	1.055	0.838	1.281	0.987	0.753	1.195	-0.582	-1.21	-0.057	1.019	0.801	1.224	-0.529	-1.119	0.026
955	0.981	0.773	1.088	0.99	0.754	1.199	-0.574	-1.208	-0.047	1.023	0.802	1.23	-0.518	-1.116	0.042
956	0.906	0.705	1.205	0.995	0.758	1.205	-0.561	-1.197	-0.031	1.028	0.805	1.238	-0.505	-1.108	0.064
957	1.05	0.69	1.286	1.004	0.766	1.213	-0.538	-1.176	-0.01	1.035	0.809	1.246	-0.486	-1.097	0.085
958	0.806	0.454	0.983	1.015	0.78	1.225	-0.509	-1.14	0.021	1.042	0.814	1.256	-0.467	-1.084	0.112
959	1.022	0.887	1.145	1.031	0.799	1.242	-0.467	-1.09	0.066	1.05	0.82	1.267	-0.445	-1.067	0.142
960	1.165	1.037	1.307	1.049	0.821	1.264	-0.42	-1.033	0.123	1.059	0.827	1.279	-0.421	-1.048	0.174
961	0.99	0.717	1.213	1.069	0.843	1.29	-0.368	-0.975	0.191	1.068	0.834	1.292	-0.396	-1.03	0.21
962	0.99	0.76	1.352	1.091	0.865	1.317	-0.311	-0.918	0.261	1.078	0.842	1.305	-0.369	-1.008	0.245
963	1.228	1.094	1.36	1.112	0.886	1.345	-0.256	-0.863	0.334	1.088	0.849	1.318	-0.342	-0.989	0.28
964	1.022	0.863	1.224	1.133	0.902	1.371	-0.201	-0.822	0.402	1.097	0.856	1.331	-0.318	-0.97	0.315
965	1.242	0.98	1.688	1.151	0.914	1.395	-0.154	-0.79	0.465	1.107	0.863	1.344	-0.291	-0.951	0.35
966	1.34	1.111	1.508	1.164	0.921	1.413	-0.12	-0.772	0.512	1.116	0.869	1.357	-0.267	-0.935	0.385
967	1.102	0.779	1.314	1.173	0.923	1.426	-0.097	-0.767	0.546	1.125	0.875	1.368	-0.242	-0.919	0.415
968	1.288	1.043	1.49	1.177	0.921	1.435	-0.086	-0.772	0.569	1.133	0.881	1.38	-0.221	-0.902	0.448
969	1.136	0.868	1.474	1.177	0.915	1.439	-0.086	-0.788	0.58	1.14	0.886	1.39	-0.202	-0.889	0.475
970	1.243	0.904	1.475	1.173	0.907	1.44	-0.097	-0.808	0.582	1.147	0.891	1.4	-0.183	-0.875	0.502
971	1.142	0.928	1.292	1.167	0.899	1.436	-0.112	-0.829	0.572	1.154	0.895	1.41	-0.164	-0.864	0.529
972	1.208	0.928	1.677	1.159	0.89	1.431	-0.133	-0.853	0.559	1.16	0.9	1.419	-0.147	-0.851	0.553
973	1.129	0.81	1.386	1.151	0.882	1.422	-0.154	-0.874	0.535	1.166	0.905	1.428	-0.131	-0.837	0.577
974	1.171	0.768	1.505	1.144	0.878	1.414	-0.172	-0.884	0.514	1.173	0.91	1.437	-0.112	-0.824	0.602
975	1.01	0.831	1.325	1.14	0.876	1.406	-0.183	-0.889	0.493	1.179	0.915	1.446	-0.096	-0.81	0.626
976	0.985	0.741	1.162	1.14	0.879	1.403	-0.183	-0.882	0.486	1.186	0.921	1.456	-0.077	-0.794	0.653
977	1.188	1.08	1.397	1.145	0.884	1.404	-0.17	-0.868	0.488	1.194	0.928	1.466	-0.056	-0.775	0.68
978	1.252	1.076	1.411	1.153	0.89	1.411	-0.149	-0.853	0.507	1.201	0.935	1.477	-0.037	-0.756	0.71
979	1.08	0.691	1.441	1.164	0.898	1.422	-0.12	-0.832	0.535	1.209	0.942	1.488	-0.015	-0.737	0.74
980	1.203	0.981	1.504	1.177	0.909	1.437	-0.086	-0.803	0.574	1.218	0.949	1.5	0.009	-0.718	0.772
981	1.098	0.83	1.26	1.194	0.922	1.455	-0.042	-0.769	0.621	1.226	0.957	1.512	0.031	-0.697	0.805
982	1.256	0.993	1.472	1.213	0.938	1.477	0.008	-0.728	0.679	1.234	0.965	1.525	0.053	-0.675	0.84
983	1.223	0.708	1.545	1.232	0.957	1.501	0.057	-0.678	0.741	1.242	0.973	1.537	0.074	-0.653	0.872
984	1.356	1.182	1.674	1.252	0.979	1.526	0.109	-0.621	0.807	1.25	0.981	1.549	0.096	-0.632	0.905
985	1.176	0.91	1.606	1.271	1.001	1.55	0.159	-0.563	0.869	1.257	0.988	1.56	0.115	-0.613	0.935
986	1.294	0.958	1.518	1.289	1.024	1.573	0.206	-0.503	0.929	1.263	0.994	1.571	0.131	-0.597	0.964
987	1.253	0.974	1.507	1.306	1.045	1.596	0.25	-0.448	0.989	1.268	1	1.58	0.145	-0.58	0.989
988	1.301	1.137	1.45	1.32	1.064	1.62	0.287	-0.399	1.052	1.272	1.005	1.588	0.155	-0.567	1.01
989	1.506	1.332	1.885	1.331	1.077	1.642	0.316	-0.365	1.109	1.274	1.008	1.595	0.161	-0.559	1.029
990	1.469	1.114	1.909	1.337	1.084	1.663	0.331	-0.347	1.164	1.275	1.009	1.6	0.164	-0.556	1.043
991	1.191	1.059	1.359	1.338	1.084	1.68	0.334	-0.347	1.209	1.274	1.009	1.603	0.161	-0.556	1.051
992	1.225	0.958	1.369	1.336	1.078	1.697	0.329	-0.362	1.253	1.272	1.008	1.604	0.155	-0.559	1.054
993	1.352	1.194	1.472	1.331	1.067	1.712	0.316	-0.391	1.292	1.268	1.005	1.602	0.145	-0.567	1.048
994	1.407	1.177	1.566	1.321	1.051	1.722	0.289	-0.433	1.318	1.263	1	1.598	0.131	-0.58	1.037
995	1.529	1.093	3.049	1.306	1.031	1.72	0.25	-0.485	1.313	1.257	0.995	1.592	0.115	-0.594	1.021
996	1.29	0.897	1.702	1.287	1.009	1.702	0.201	-0.542	1.266	1.249	0.988	1.582	0.093	-0.613	0.994
997	1.107	0.843	1.621	1.265	0.986	1.669	0.143	-0.602	1.18	1.24	0.982	1.569	0.069	-0.629	0.959
998	1.201	0.996	1.466	1.242	0.964	1.628	0.083	-0.66	1.073	1.231	0.974	1.555	0.045	-0.651	0.921
999	1.271	0.958	1.555	1.22	0.945	1.583	0.026	-0.709	0.955	1.221	0.967	1.539	0.018	-0.67	0.878
1000	1.209	0.998	1.451	1.198	0.927	1.536	-0.032	-0.756	0.833	1.212	0.96	1.522	-0.007	-0.689	0.832
1001	1.22	0.832	1.505	1.177	0.912	1.492	-0.086	-0.795	0.718	1.202	0.954	1.505	-0.034	-0.705	0.786
1002	1.025	0.789	1.228	1.159	0.901	1.452	-0.133	-0.824	0.614	1.193	0.948	1.488	-0.058	-0.721	0.74
1003	1.024	0.818	1.279	1.144	0.894	1.417	-0.172	-0.842	0.522	1.185	0.943	1.471	-0.08	-0.735	0.694
1004	1.118	0.981	1.326	1.132	0.891	1.388	-0.204	-0.85	0.447	1.177	0.939	1.456	-0.101	-0.745	0.653
1005	1.211	0.877	1.486	1.123	0.89	1.364	-0.227	-0.853	0.384	1.17	0.936	1.442	-0.12	-0.753	0.615
1006	1.157	0.734	1.48	1.115	0.892	1.343	-0.248	-0.848	0.329	1.165	0.934	1.429	-0.134	-0.759	0.58
1007	1.254	1.172	1.402	1.107	0.894	1.324	-0.269	-0.842	0.28	1.16	0.933	1.419	-0.147	-0.762	0.553
1008	1.142	0.925	1.416	1.101	0.896	1.308	-0.285	-0.837	0.238	1.157	0.932	1.41	-0.156	-0.764	0.529
1009	0.961	0.8	1.304	1.096	0.898	1.296	-0.298	-0.832	0.206	1.155	0.933	1.403	-0.161	-0.762	0.51
1010	1.067	0.989	1.131	1.096	0.901	1.289	-0.298	-0.824	0.188	1.154	0.934	1.399	-0.164	-0.759	0.499
1011	1.042	0.959	1.083	1.099	0.903	1.292	-0.29	-0.819	0.196	1.155	0.936	1.397	-0.161	-0.753	0.494
1012	1.052	0.838	1.231	1.108	0.908	1.303	-0.266	-0.806	0.225	1.157	0.939	1.397	-0.156	-0.745	0.494
1013	1.077	0.863	1.207	1.12	0.914	1.323	-0.235	-0.79	0.277	1.16	0.942	1.4	-0.147	-0.737	0.502
1014	1.14	0.826	1.377	1.136	0.924	1.349	-0.193	-0.764	0.345	1.164	0.946	1.405	-0.137	-0.726	0.515
1015	1.127	0.904	1.46	1.153	0.937	1.378	-0.149	-0.73	0.421	1.169	0.95	1.412	-0.123	-0.716	0.534
1016	1.211	0.889	1.496	1.172	0.952	1.408	-0.099	-0.691	0.499	1.174	0.954	1.42	-0.11	-0.705	0.556
1017	1.224	0.985	1.432	1.19	0.969	1.438	-0.052	-0.647	0.577	1.18	0.959	1.429	-0.093	-0.691	0.58
1018	1.183	0.99	1.381	1.206	0.984	1.465	-0.011	-0.608	0.647	1.185	0.963	1.438	-0.08	-0.68	0.605
1019	1.249	1.061	1.401	1.22	0.998	1.489	0.026	-0.571	0.71	1.19	0.967	1.447	-0.066	-0.67	0.629
1020	1.429	1.242	1.954	1.23	1.008	1.508	0.052	-0.545	0.76	1.195	0.97	1.456	-0.053	-0.662	0.653
1021	1.256	0.922	1.643	1.236	1.013	1.52	0.068	-0.532	0.791	1.199	0.972	1.465	-0.042	-0.656	0.678
1022	1.237	1.058	1.459	1.238	1.015	1.525	0.073	-0.527	0.804	1.202	0.973	1.472	-0.034	-0.653	0.697
1023	1.152	1.024	1.414	1.239	1.014	1.527	0.075	-0.529	0.809	1.204	0.972	1.479	-0.029	-0.656	0.715
1024	1.226	1.03	1.59	1.24	1.011	1.527	0.078	-0.537	0.809	1.206	0.971	1.485	-0.023	-0.659	0.732
1025	1.015	0.791	1.175	1.24	1.007	1.526	0.078	-0.548	0.807	1.206	0.969	1.491	-0.023	-0.664	0.748
1026	1.208	0.877	1.495	1.241	1.002	1.526	0.081	-0.561	0.807	1.206	0.966	1.495	-0.023	-0.672	0.759
1027	1.447	1.22	1.778	1.24	0.997	1.526	0.078	-0.574	0.807	1.205	0.962	1.499	-0.026	-0.683	0.77
1028	1.313	1.016	1.652	1.236	0.988	1.523	0.068	-0.597	0.799	1.202	0.957	1.501	-0.034	-0.697	0.775
1029	1.199	0.957	1.543	1.229	0.976	1.518	0.049	-0.628	0.786	1.199	0.95	1.502	-0.042	-0.716	0.778
1030	1.316	1.163	1.469	1.219	0.962	1.513	0.023	-0.665	0.773	1.194	0.943	1.502	-0.056	-0.735	0.778
1031	1.206	0.913	1.361	1.206	0.945	1.508	-0.011	-0.709	0.76	1.188	0.935	1.501	-0.072	-0.756	0.775
1032	1.062	0.793	1.17	1.192	0.927	1.506	-0.047	-0.756	0.754	1.182	0.926	1.5	-0.088	-0.781	0.772
1033	1.223	0.907	1.633	1.179	0.91	1.506	-0.081	-0.801	0.754	1.175	0.917	1.497	-0.107	-0.805	0.764
1034	1.162	0.897	1.562	1.165	0.894	1.506	-0.118	-0.842	0.754	1.167	0.908	1.493	-0.129	-0.829	0.753
1035	1.143	0.793	1.82	1.152	0.88	1.503	-0.152	-0.879	0.747	1.159	0.899	1.489	-0.15	-0.854	0.743
1036	1.078	0.854	1.551	1.14	0.868	1.496	-0.183	-0.91	0.728	1.151	0.89	1.482	-0.172	-0.878	0.724
1037	1.149	0.895	1.393	1.129	0.858	1.487	-0.212	-0.936	0.705	1.142	0.88	1.475	-0.196	-0.905	0.705
1038	1.132	0.891	1.346	1.12	0.849	1.477	-0.235	-0.96	0.679	1.133	0.871	1.467	-0.221	-0.929	0.683
1039	1.072	0.86	1.413	1.111	0.841	1.467	-0.259	-0.981	0.653	1.124	0.862	1.458	-0.245	-0.954	0.659
1040	1.128	0.792	1.584	1.104	0.835	1.458	-0.277	-0.996	0.629	1.115	0.854	1.448	-0.269	-0.975	0.632
1041	1.084	0.844	1.422	1.098	0.83	1.45	-0.292	-1.009	0.608	1.106	0.845	1.438	-0.294	-1	0.605
1042	1.034	0.744	1.16	1.092	0.826	1.442	-0.308	-1.02	0.587	1.097	0.837	1.427	-0.318	-1.021	0.575
1043	1.143	0.74	1.524	1.087	0.825	1.434	-0.321	-1.022	0.567	1.088	0.829	1.415	-0.342	-1.043	0.542
1044	1.141	0.92	1.438	1.082	0.824	1.426	-0.334	-1.025	0.546	1.079	0.822	1.403	-0.367	-1.062	0.51
1045	1.027	0.833	1.748	1.076	0.824	1.414	-0.35	-1.025	0.514	1.071	0.815	1.39	-0.388	-1.081	0.475
1046	1.075	0.865	1.296	1.07	0.822	1.399	-0.365	-1.03	0.475	1.062	0.808	1.376	-0.413	-1.1	0.437
1047	0.959	0.734	1.246	1.063	0.819	1.381	-0.384	-1.038	0.428	1.054	0.801	1.362	-0.434	-1.119	0.399
1048	1.149	0.898	1.483	1.057	0.815	1.362	-0.399	-1.048	0.379	1.045	0.794	1.348	-0.459	-1.138	0.361
1049	1.085	0.866	1.397	1.048	0.808	1.341	-0.423	-1.067	0.324	1.037	0.788	1.334	-0.48	-1.154	0.323
1050	1.138	0.854	1.366	1.038	0.799	1.319	-0.449	-1.09	0.266	1.029	0.782	1.32	-0.502	-1.17	0.285
1051	0.935	0.744	1.199	1.027	0.788	1.297	-0.478	-1.119	0.209	1.022	0.776	1.307	-0.521	-1.186	0.25
1052	1.119	0.821	1.352	1.015	0.776	1.276	-0.509	-1.15	0.154	1.015	0.77	1.294	-0.54	-1.203	0.215
1053	0.988	0.702	1.167	1.003	0.764	1.259	-0.54	-1.182	0.11	1.009	0.766	1.282	-0.556	-1.214	0.183
1054	0.895	0.746	1.015	0.992	0.752	1.245	-0.569	-1.213	0.073	1.003	0.761	1.271	-0.572	-1.227	0.153
1055	0.949	0.691	1.288	0.983	0.742	1.236	-0.592	-1.239	0.05	0.998	0.758	1.261	-0.586	-1.235	0.126
1056	0.996	0.809	1.27	0.976	0.733	1.229	-0.611	-1.263	0.032	0.994	0.755	1.252	-0.597	-1.243	0.101
1057	1.068	0.833	1.36	0.971	0.726	1.225	-0.624	-1.281	0.021	0.991	0.754	1.245	-0.605	-1.246	0.082
1058	0.943	0.739	1.196	0.969	0.721	1.223	-0.629	-1.294	0.016	0.989	0.753	1.239	-0.61	-1.249	0.066
1059	0.861	0.509	1.09	0.969	0.72	1.223	-0.629	-1.296	0.016	0.988	0.754	1.235	-0.613	-1.246	0.055
1060	0.726	0.545	0.948	0.972	0.724	1.224	-0.621	-1.286	0.019	0.989	0.756	1.232	-0.61	-1.24	0.047
1061	1.089	0.749	1.407	0.979	0.733	1.226	-0.603	-1.263	0.024	0.99	0.759	1.231	-0.608	-1.232	0.045
1062	1.061	0.687	1.413	0.986	0.746	1.227	-0.585	-1.229	0.026	0.993	0.763	1.231	-0.599	-1.222	0.045
1063	0.956	0.708	1.27	0.993	0.76	1.223	-0.566	-1.192	0.016	0.996	0.768	1.232	-0.591	-1.208	0.047
1064	1.119	0.983	1.298	0.997	0.774	1.216	-0.556	-1.156	-0.002	1	0.774	1.235	-0.58	-1.192	0.055
1065	1.116	0.919	1.331	0.998	0.784	1.205	-0.553	-1.129	-0.031	1.005	0.781	1.239	-0.567	-1.173	0.066
1066	1.184	0.947	1.383	0.996	0.789	1.191	-0.558	-1.116	-0.067	1.011	0.787	1.244	-0.551	-1.157	0.08
1067	1.048	0.932	1.206	0.991	0.791	1.177	-0.572	-1.111	-0.104	1.017	0.795	1.251	-0.534	-1.135	0.099
1068	0.861	0.691	0.99	0.987	0.791	1.167	-0.582	-1.111	-0.13	1.025	0.802	1.26	-0.513	-1.116	0.123
1069	0.858	0.636	1.002	0.986	0.792	1.166	-0.585	-1.109	-0.133	1.033	0.811	1.271	-0.491	-1.092	0.153
1070	0.892	0.711	1.032	0.991	0.797	1.176	-0.572	-1.095	-0.107	1.042	0.82	1.284	-0.467	-1.067	0.188
1071	0.871	0.7	1.051	1.003	0.806	1.198	-0.54	-1.072	-0.049	1.053	0.829	1.3	-0.437	-1.043	0.231
1072	0.95	0.732	1.086	1.022	0.819	1.233	-0.491	-1.038	0.042	1.064	0.839	1.316	-0.407	-1.016	0.275
1073	1.022	0.809	1.123	1.045	0.836	1.279	-0.431	-0.994	0.162	1.076	0.85	1.335	-0.375	-0.986	0.326
1074	1.081	0.907	1.29	1.072	0.855	1.332	-0.36	-0.944	0.301	1.089	0.86	1.354	-0.34	-0.959	0.377
1075	1.21	1.027	1.488	1.101	0.874	1.388	-0.285	-0.895	0.447	1.101	0.871	1.373	-0.307	-0.929	0.429
1076	1.168	0.915	1.606	1.128	0.891	1.443	-0.214	-0.85	0.59	1.114	0.881	1.391	-0.272	-0.902	0.477
1077	1.101	0.901	1.321	1.154	0.906	1.493	-0.146	-0.811	0.72	1.126	0.891	1.409	-0.24	-0.875	0.526
1078	1.207	0.903	1.79	1.176	0.919	1.534	-0.089	-0.777	0.827	1.136	0.9	1.424	-0.213	-0.851	0.567
1079	1.224	0.871	1.587	1.195	0.93	1.564	-0.039	-0.748	0.906	1.146	0.908	1.437	-0.185	-0.829	0.602
1080	1.297	0.969	1.952	1.209	0.939	1.581	-0.003	-0.725	0.95	1.155	0.916	1.447	-0.161	-0.808	0.629
1081	1.354	1.002	1.862	1.217	0.946	1.583	0.018	-0.707	0.955	1.162	0.923	1.455	-0.142	-0.789	0.651
1082	1.195	1.053	1.396	1.22	0.95	1.573	0.026	-0.696	0.929	1.168	0.929	1.459	-0.126	-0.772	0.661
1083	1.203	0.953	1.537	1.219	0.951	1.555	0.023	-0.694	0.882	1.172	0.933	1.461	-0.115	-0.762	0.667
1084	1.209	0.976	1.505	1.215	0.951	1.533	0.013	-0.694	0.825	1.174	0.937	1.46	-0.11	-0.751	0.664
1085	1.19	0.979	1.424	1.21	0.951	1.509	0	-0.694	0.762	1.175	0.94	1.458	-0.107	-0.743	0.659
1086	1.079	0.608	1.223	1.205	0.953	1.487	-0.013	-0.688	0.705	1.175	0.942	1.453	-0.107	-0.737	0.645
1087	1.213	0.981	1.456	1.199	0.956	1.468	-0.029	-0.681	0.655	1.174	0.943	1.447	-0.11	-0.735	0.629
1088	1.09	0.909	1.338	1.194	0.961	1.451	-0.042	-0.668	0.611	1.171	0.942	1.44	-0.118	-0.737	0.61
1089	1.232	1.041	1.51	1.189	0.966	1.437	-0.055	-0.655	0.574	1.167	0.941	1.431	-0.129	-0.74	0.586
1090	1.203	1.002	1.334	1.183	0.969	1.423	-0.071	-0.647	0.538	1.163	0.939	1.421	-0.139	-0.745	0.559
1091	1.239	1.04	1.541	1.174	0.97	1.408	-0.094	-0.644	0.499	1.157	0.936	1.411	-0.156	-0.753	0.531
1092	1.141	0.94	1.397	1.163	0.966	1.391	-0.123	-0.655	0.454	1.15	0.931	1.4	-0.175	-0.767	0.502
1093	1.144	0.934	1.556	1.15	0.958	1.371	-0.157	-0.675	0.402	1.142	0.925	1.388	-0.196	-0.783	0.469
1094	1.318	1.131	1.482	1.133	0.946	1.347	-0.201	-0.707	0.34	1.133	0.918	1.375	-0.221	-0.802	0.434
1095	1.246	1.143	1.421	1.114	0.928	1.321	-0.251	-0.754	0.272	1.124	0.91	1.363	-0.245	-0.824	0.402
1096	0.934	0.763	1.065	1.093	0.908	1.294	-0.305	-0.806	0.201	1.115	0.901	1.351	-0.269	-0.848	0.369
1097	1.114	0.946	1.314	1.073	0.886	1.271	-0.358	-0.863	0.141	1.105	0.891	1.339	-0.296	-0.875	0.337
1098	0.905	0.628	1.134	1.056	0.865	1.252	-0.402	-0.918	0.092	1.096	0.882	1.328	-0.321	-0.9	0.307
1099	0.969	0.834	1.187	1.043	0.847	1.239	-0.436	-0.965	0.058	1.087	0.872	1.318	-0.345	-0.927	0.28
1100	1.031	0.781	1.168	1.035	0.834	1.232	-0.457	-0.999	0.04	1.078	0.862	1.309	-0.369	-0.954	0.256
1101	1.004	0.761	1.197	1.03	0.823	1.233	-0.47	-1.028	0.042	1.069	0.853	1.302	-0.394	-0.978	0.237
1102	1.073	0.891	1.267	1.029	0.816	1.239	-0.472	-1.046	0.058	1.061	0.843	1.295	-0.415	-1.005	0.218
1103	0.922	0.765	1.148	1.03	0.811	1.251	-0.47	-1.059	0.089	1.054	0.834	1.289	-0.434	-1.03	0.201
1104	1.045	0.873	1.207	1.034	0.807	1.267	-0.459	-1.069	0.131	1.046	0.826	1.284	-0.456	-1.051	0.188
1105	1.005	0.697	1.138	1.038	0.804	1.285	-0.449	-1.077	0.178	1.039	0.817	1.279	-0.475	-1.076	0.174
1106	1.087	0.858	1.249	1.042	0.802	1.304	-0.438	-1.082	0.227	1.032	0.809	1.274	-0.494	-1.097	0.161
1107	1.182	0.932	1.624	1.043	0.799	1.32	-0.436	-1.09	0.269	1.025	0.801	1.268	-0.513	-1.119	0.145
1108	1.126	0.812	1.565	1.042	0.794	1.328	-0.438	-1.103	0.29	1.017	0.794	1.263	-0.534	-1.138	0.131
1109	0.991	0.667	1.34	1.037	0.789	1.329	-0.451	-1.116	0.293	1.01	0.786	1.256	-0.553	-1.159	0.112
1110	0.937	0.713	1.368	1.03	0.784	1.321	-0.47	-1.129	0.272	1.002	0.779	1.248	-0.575	-1.178	0.09
1111	1.051	0.874	1.29	1.021	0.778	1.308	-0.493	-1.145	0.238	0.994	0.772	1.24	-0.597	-1.197	0.069
1112	1.063	0.817	1.258	1.01	0.771	1.289	-0.522	-1.163	0.188	0.986	0.766	1.231	-0.618	-1.214	0.045
1113	1.079	0.884	1.315	0.997	0.763	1.267	-0.556	-1.184	0.131	0.978	0.76	1.221	-0.64	-1.23	0.018
1114	0.928	0.681	1.232	0.983	0.753	1.243	-0.592	-1.21	0.068	0.97	0.754	1.211	-0.662	-1.246	-0.01
1115	0.911	0.668	1.089	0.967	0.743	1.217	-0.634	-1.236	0	0.962	0.748	1.201	-0.683	-1.262	-0.037
1116	1.017	0.767	1.228	0.952	0.734	1.193	-0.673	-1.26	-0.062	0.954	0.743	1.19	-0.705	-1.276	-0.066
1117	0.933	0.696	1.141	0.937	0.725	1.169	-0.712	-1.283	-0.125	0.946	0.739	1.181	-0.726	-1.286	-0.091
1118	0.885	0.742	1.164	0.923	0.718	1.147	-0.749	-1.302	-0.182	0.939	0.735	1.171	-0.745	-1.297	-0.118
1119	0.921	0.722	1.268	0.91	0.712	1.127	-0.783	-1.317	-0.234	0.933	0.731	1.162	-0.762	-1.308	-0.142
1120	0.954	0.763	1.146	0.9	0.708	1.11	-0.809	-1.328	-0.279	0.927	0.729	1.154	-0.778	-1.314	-0.164
1121	0.807	0.567	0.945	0.892	0.706	1.097	-0.83	-1.333	-0.313	0.922	0.726	1.147	-0.791	-1.322	-0.183
1122	0.819	0.684	0.956	0.888	0.707	1.09	-0.84	-1.33	-0.331	0.917	0.725	1.141	-0.805	-1.324	-0.199
1123	0.931	0.733	1.092	0.887	0.71	1.09	-0.843	-1.322	-0.331	0.913	0.724	1.136	-0.816	-1.327	-0.213
1124	0.828	0.698	1.002	0.889	0.715	1.096	-0.838	-1.309	-0.315	0.911	0.723	1.132	-0.821	-1.33	-0.223
1125	0.819	0.677	0.93	0.895	0.721	1.108	-0.822	-1.294	-0.284	0.908	0.723	1.13	-0.829	-1.33	-0.229
1126	0.835	0.729	0.926	0.902	0.728	1.125	-0.804	-1.276	-0.24	0.907	0.723	1.129	-0.832	-1.33	-0.231
1127	0.977	0.762	1.342	0.911	0.736	1.142	-0.78	-1.255	-0.195	0.906	0.724	1.129	-0.835	-1.327	-0.231
1128	1.003	0.764	1.308	0.918	0.742	1.156	-0.762	-1.239	-0.159	0.905	0.724	1.13	-0.837	-1.327	-0.229
1129	0.963	0.788	1.473	0.923	0.746	1.163	-0.749	-1.229	-0.14	0.905	0.724	1.13	-0.837	-1.327	-0.229
1130	1.017	0.754	1.345	0.925	0.748	1.162	-0.744	-1.223	-0.143	0.905	0.724	1.131	-0.837	-1.327	-0.226
1131	0.989	0.845	1.204	0.923	0.748	1.153	-0.749	-1.223	-0.167	0.904	0.724	1.133	-0.84	-1.327	-0.221
1132	0.884	0.764	1.016	0.919	0.746	1.14	-0.759	-1.229	-0.2	0.904	0.724	1.134	-0.84	-1.327	-0.218
1133	0.926	0.669	1.133	0.914	0.741	1.126	-0.772	-1.242	-0.237	0.905	0.724	1.137	-0.837	-1.327	-0.21
1134	0.906	0.781	1.063	0.908	0.736	1.114	-0.788	-1.255	-0.268	0.905	0.723	1.14	-0.837	-1.33	-0.202
1135	0.894	0.709	1.069	0.903	0.731	1.106	-0.801	-1.268	-0.289	0.906	0.723	1.145	-0.835	-1.33	-0.188
1136	0.793	0.654	0.9	0.9	0.727	1.103	-0.809	-1.278	-0.297	0.907	0.722	1.151	-0.832	-1.332	-0.172
1137	0.867	0.738	1.04	0.9	0.724	1.108	-0.809	-1.286	-0.284	0.909	0.722	1.158	-0.827	-1.332	-0.153
1138	0.873	0.704	1.13	0.902	0.721	1.119	-0.804	-1.294	-0.255	0.911	0.722	1.166	-0.821	-1.332	-0.131
1139	0.932	0.744	1.112	0.906	0.72	1.137	-0.793	-1.296	-0.208	0.914	0.722	1.176	-0.813	-1.332	-0.104
1140	0.784	0.641	0.946	0.913	0.719	1.16	-0.775	-1.299	-0.148	0.917	0.722	1.186	-0.805	-1.332	-0.077
1141	0.899	0.705	1.068	0.92	0.719	1.187	-0.757	-1.299	-0.078	0.921	0.723	1.198	-0.794	-1.33	-0.045
1142	1.074	0.766	1.469	0.927	0.72	1.213	-0.739	-1.296	-0.01	0.925	0.723	1.21	-0.783	-1.33	-0.012
1143	1.042	0.83	1.479	0.933	0.72	1.237	-0.723	-1.296	0.053	0.929	0.724	1.221	-0.772	-1.327	0.018
1144	1.022	0.711	1.386	0.935	0.719	1.255	-0.718	-1.299	0.1	0.934	0.726	1.233	-0.759	-1.322	0.05
1145	0.847	0.619	1.141	0.936	0.718	1.268	-0.715	-1.302	0.133	0.938	0.727	1.244	-0.748	-1.319	0.08
1146	0.907	0.729	1.38	0.936	0.717	1.278	-0.715	-1.304	0.16	0.943	0.729	1.255	-0.735	-1.314	0.109
1147	0.932	0.782	1.249	0.937	0.716	1.284	-0.712	-1.307	0.175	0.948	0.732	1.266	-0.721	-1.305	0.139
1148	0.966	0.734	1.256	0.937	0.715	1.288	-0.712	-1.309	0.186	0.953	0.734	1.276	-0.708	-1.3	0.166
1149	0.973	0.763	1.199	0.939	0.714	1.292	-0.707	-1.312	0.196	0.959	0.738	1.285	-0.691	-1.289	0.191
1150	0.936	0.726	1.437	0.941	0.714	1.296	-0.702	-1.312	0.206	0.965	0.741	1.294	-0.675	-1.281	0.215
1151	0.811	0.614	1.204	0.946	0.716	1.3	-0.689	-1.307	0.217	0.971	0.745	1.303	-0.659	-1.27	0.239
1152	0.967	0.714	1.318	0.953	0.72	1.305	-0.671	-1.296	0.23	0.978	0.75	1.311	-0.64	-1.257	0.261
1153	0.962	0.66	1.239	0.963	0.728	1.312	-0.645	-1.276	0.248	0.984	0.755	1.319	-0.624	-1.243	0.283
1154	0.896	0.662	1.223	0.975	0.739	1.32	-0.613	-1.247	0.269	0.991	0.76	1.326	-0.605	-1.23	0.302
1155	1.035	0.742	1.354	0.989	0.753	1.331	-0.577	-1.21	0.298	0.998	0.766	1.332	-0.586	-1.214	0.318
1156	1.007	0.801	1.343	1.003	0.769	1.342	-0.54	-1.168	0.326	1.004	0.772	1.337	-0.57	-1.197	0.331
1157	1.04	0.808	1.375	1.017	0.785	1.353	-0.504	-1.127	0.355	1.011	0.778	1.342	-0.551	-1.181	0.345
1158	0.964	0.769	1.289	1.031	0.8	1.363	-0.467	-1.088	0.381	1.016	0.783	1.345	-0.537	-1.168	0.353
1159	1.172	0.894	1.633	1.043	0.813	1.37	-0.436	-1.054	0.4	1.022	0.788	1.347	-0.521	-1.154	0.358
1160	1.085	0.887	1.453	1.053	0.824	1.375	-0.41	-1.025	0.413	1.026	0.792	1.347	-0.51	-1.143	0.358
1161	0.974	0.83	1.161	1.061	0.832	1.377	-0.389	-1.004	0.418	1.029	0.796	1.346	-0.502	-1.132	0.356
1162	1.034	0.819	1.312	1.068	0.837	1.379	-0.371	-0.991	0.423	1.032	0.799	1.344	-0.494	-1.124	0.35
1163	1.099	0.866	1.311	1.073	0.839	1.379	-0.358	-0.986	0.423	1.033	0.801	1.341	-0.491	-1.119	0.342
1164	1.098	0.829	1.413	1.075	0.838	1.378	-0.352	-0.988	0.421	1.033	0.802	1.336	-0.491	-1.116	0.329
1165	1.141	0.861	1.559	1.074	0.836	1.374	-0.355	-0.994	0.41	1.033	0.803	1.329	-0.491	-1.113	0.31
1166	1.047	0.794	1.375	1.07	0.831	1.366	-0.365	-1.007	0.389	1.031	0.803	1.322	-0.496	-1.113	0.291
1167	1.006	0.769	1.216	1.063	0.825	1.354	-0.384	-1.022	0.358	1.028	0.802	1.313	-0.505	-1.116	0.266
1168	1.169	0.932	1.48	1.054	0.817	1.339	-0.407	-1.043	0.319	1.024	0.8	1.302	-0.516	-1.122	0.237
1169	1.087	0.845	1.349	1.042	0.808	1.32	-0.438	-1.067	0.269	1.019	0.798	1.291	-0.529	-1.127	0.207
1170	0.981	0.78	1.218	1.028	0.798	1.298	-0.475	-1.093	0.212	1.014	0.795	1.279	-0.543	-1.135	0.174
1171	0.973	0.762	1.383	1.013	0.787	1.274	-0.514	-1.122	0.149	1.008	0.792	1.266	-0.559	-1.143	0.139
1172	1.001	0.752	1.272	0.997	0.778	1.249	-0.556	-1.145	0.084	1.002	0.789	1.253	-0.575	-1.151	0.104
1173	0.944	0.726	1.134	0.983	0.77	1.223	-0.592	-1.166	0.016	0.995	0.786	1.239	-0.594	-1.159	0.066
1174	0.973	0.662	1.154	0.969	0.763	1.197	-0.629	-1.184	-0.052	0.989	0.783	1.226	-0.61	-1.168	0.031
1175	0.99	0.832	1.198	0.955	0.759	1.174	-0.665	-1.195	-0.112	0.982	0.78	1.213	-0.629	-1.176	-0.004
1176	0.997	0.842	1.224	0.943	0.755	1.152	-0.697	-1.205	-0.169	0.976	0.778	1.201	-0.645	-1.181	-0.037
1177	0.894	0.681	1.136	0.932	0.752	1.133	-0.725	-1.213	-0.219	0.97	0.775	1.189	-0.662	-1.189	-0.069
1178	0.905	0.793	1.059	0.924	0.75	1.117	-0.746	-1.218	-0.261	0.964	0.773	1.178	-0.678	-1.194	-0.099
1179	0.863	0.737	1.034	0.918	0.749	1.105	-0.762	-1.221	-0.292	0.959	0.771	1.168	-0.691	-1.2	-0.126
1180	0.836	0.698	0.993	0.915	0.749	1.099	-0.77	-1.221	-0.308	0.955	0.77	1.16	-0.702	-1.203	-0.147
1181	0.959	0.786	1.128	0.916	0.75	1.098	-0.767	-1.218	-0.31	0.951	0.769	1.152	-0.713	-1.205	-0.169
1182	0.876	0.696	1.011	0.918	0.752	1.101	-0.762	-1.213	-0.302	0.947	0.768	1.146	-0.724	-1.208	-0.185
1183	0.967	0.844	1.163	0.923	0.755	1.108	-0.749	-1.205	-0.284	0.944	0.767	1.14	-0.732	-1.211	-0.202
1184	0.979	0.73	1.172	0.928	0.759	1.116	-0.736	-1.195	-0.263	0.942	0.766	1.135	-0.737	-1.214	-0.215
1185	0.909	0.715	1.151	0.934	0.763	1.125	-0.72	-1.184	-0.24	0.939	0.766	1.13	-0.745	-1.214	-0.229
1186	0.861	0.699	1.047	0.94	0.769	1.133	-0.705	-1.168	-0.219	0.937	0.765	1.126	-0.751	-1.216	-0.24
1187	0.943	0.77	1.134	0.947	0.774	1.141	-0.686	-1.156	-0.198	0.935	0.765	1.122	-0.756	-1.216	-0.25
1188	1.003	0.845	1.234	0.953	0.779	1.148	-0.671	-1.142	-0.18	0.932	0.764	1.118	-0.764	-1.219	-0.261
1189	0.98	0.834	1.183	0.957	0.783	1.151	-0.66	-1.132	-0.172	0.929	0.764	1.114	-0.772	-1.219	-0.272
1190	1.036	0.894	1.295	0.958	0.784	1.152	-0.658	-1.129	-0.169	0.926	0.763	1.11	-0.781	-1.222	-0.283
1191	0.902	0.716	1.019	0.958	0.783	1.149	-0.658	-1.132	-0.177	0.923	0.761	1.105	-0.789	-1.227	-0.296
1192	0.971	0.774	1.118	0.955	0.781	1.143	-0.665	-1.137	-0.193	0.919	0.759	1.1	-0.799	-1.232	-0.31
1193	1.005	0.746	1.221	0.95	0.778	1.136	-0.679	-1.145	-0.211	0.914	0.757	1.094	-0.813	-1.238	-0.326
1194	0.883	0.723	1.04	0.943	0.775	1.126	-0.697	-1.153	-0.237	0.91	0.755	1.088	-0.824	-1.243	-0.342
1195	1.003	0.839	1.243	0.934	0.771	1.115	-0.72	-1.163	-0.266	0.904	0.753	1.082	-0.84	-1.249	-0.359
1196	0.845	0.707	1.01	0.924	0.766	1.102	-0.746	-1.176	-0.3	0.899	0.75	1.075	-0.854	-1.257	-0.377
1197	0.925	0.777	1.1	0.913	0.761	1.087	-0.775	-1.189	-0.339	0.893	0.747	1.068	-0.87	-1.265	-0.396
1198	0.908	0.749	1.068	0.901	0.755	1.072	-0.806	-1.205	-0.378	0.888	0.744	1.061	-0.883	-1.273	-0.415
1199	0.978	0.861	1.234	0.888	0.748	1.056	-0.84	-1.223	-0.42	0.882	0.742	1.055	-0.9	-1.278	-0.432
1200	0.806	0.699	0.917	0.875	0.739	1.04	-0.874	-1.247	-0.461	0.876	0.739	1.048	-0.916	-1.286	-0.451
1201	0.802	0.701	0.892	0.862	0.73	1.026	-0.908	-1.27	-0.498	0.871	0.736	1.042	-0.929	-1.295	-0.467
1202	0.923	0.802	1.09	0.849	0.72	1.013	-0.942	-1.296	-0.532	0.866	0.733	1.036	-0.943	-1.303	-0.483
1203	0.899	0.714	1.053	0.837	0.711	1.002	-0.973	-1.32	-0.561	0.862	0.731	1.031	-0.954	-1.308	-0.496
1204	0.841	0.706	0.981	0.826	0.703	0.994	-1.002	-1.341	-0.581	0.858	0.729	1.027	-0.965	-1.314	-0.507
1205	0.789	0.67	0.959	0.817	0.696	0.988	-1.026	-1.359	-0.597	0.855	0.728	1.024	-0.973	-1.316	-0.516
1206	0.698	0.597	0.888	0.811	0.692	0.985	-1.041	-1.369	-0.605	0.853	0.727	1.021	-0.978	-1.319	-0.524
1207	0.692	0.593	0.87	0.809	0.692	0.985	-1.046	-1.369	-0.605	0.852	0.728	1.02	-0.981	-1.316	-0.526
1208	0.856	0.693	1.113	0.81	0.696	0.988	-1.044	-1.359	-0.597	0.852	0.728	1.019	-0.981	-1.316	-0.529
1209	0.876	0.781	1.116	0.815	0.701	0.992	-1.031	-1.346	-0.587	0.853	0.73	1.019	-0.978	-1.311	-0.529
1210	0.742	0.64	0.878	0.821	0.708	0.996	-1.015	-1.328	-0.576	0.855	0.732	1.02	-0.973	-1.305	-0.526
1211	0.872	0.767	1.006	0.829	0.716	1.001	-0.994	-1.307	-0.563	0.857	0.734	1.022	-0.967	-1.3	-0.521
1212	0.901	0.807	1.013	0.837	0.724	1.007	-0.973	-1.286	-0.548	0.861	0.736	1.024	-0.956	-1.295	-0.516
1213	0.833	0.704	1.03	0.846	0.731	1.013	-0.95	-1.268	-0.532	0.864	0.739	1.026	-0.948	-1.286	-0.51
1214	0.896	0.787	1.034	0.854	0.737	1.019	-0.929	-1.252	-0.516	0.868	0.742	1.029	-0.938	-1.278	-0.502
1215	0.926	0.785	1.133	0.863	0.743	1.024	-0.906	-1.236	-0.503	0.872	0.744	1.033	-0.927	-1.273	-0.491
1216	0.867	0.768	1.101	0.872	0.749	1.028	-0.882	-1.221	-0.493	0.877	0.747	1.036	-0.913	-1.265	-0.483
1217	0.773	0.619	0.942	0.882	0.756	1.033	-0.856	-1.202	-0.48	0.881	0.749	1.039	-0.902	-1.26	-0.475
1218	0.827	0.701	0.932	0.894	0.764	1.04	-0.825	-1.182	-0.461	0.885	0.751	1.042	-0.891	-1.254	-0.467
1219	0.844	0.715	0.994	0.908	0.774	1.049	-0.788	-1.156	-0.438	0.89	0.753	1.046	-0.878	-1.249	-0.456
1220	0.885	0.74	0.982	0.923	0.785	1.061	-0.749	-1.127	-0.407	0.893	0.755	1.049	-0.87	-1.243	-0.448
1221	0.958	0.831	1.033	0.938	0.795	1.074	-0.71	-1.101	-0.373	0.896	0.755	1.052	-0.862	-1.243	-0.44
1222	1.001	0.88	1.143	0.95	0.802	1.088	-0.679	-1.082	-0.336	0.899	0.755	1.054	-0.854	-1.243	-0.434
1223	1.025	0.894	1.152	0.959	0.806	1.099	-0.655	-1.072	-0.308	0.9	0.754	1.055	-0.851	-1.246	-0.432
1224	1.023	0.817	1.168	0.962	0.805	1.108	-0.647	-1.075	-0.284	0.9	0.752	1.056	-0.851	-1.251	-0.429
1225	1.041	0.883	1.197	0.961	0.799	1.112	-0.65	-1.09	-0.274	0.899	0.749	1.055	-0.854	-1.26	-0.432
1226	0.954	0.786	1.049	0.954	0.788	1.112	-0.668	-1.119	-0.274	0.896	0.745	1.054	-0.862	-1.27	-0.434
1227	0.915	0.764	1.074	0.943	0.774	1.107	-0.697	-1.156	-0.287	0.893	0.74	1.051	-0.87	-1.284	-0.442
1228	0.932	0.76	1.072	0.928	0.757	1.099	-0.736	-1.2	-0.308	0.889	0.734	1.047	-0.881	-1.3	-0.453
1229	0.998	0.778	1.351	0.91	0.739	1.085	-0.783	-1.247	-0.344	0.884	0.729	1.043	-0.894	-1.314	-0.464
1230	0.809	0.585	0.985	0.89	0.72	1.067	-0.835	-1.296	-0.391	0.878	0.723	1.037	-0.91	-1.33	-0.48
1231	0.922	0.777	1.139	0.869	0.702	1.045	-0.89	-1.343	-0.448	0.873	0.717	1.031	-0.924	-1.346	-0.496
1232	0.858	0.714	1.067	0.848	0.684	1.022	-0.945	-1.39	-0.508	0.867	0.711	1.024	-0.94	-1.362	-0.516
1233	0.848	0.689	0.94	0.828	0.668	0.997	-0.997	-1.432	-0.574	0.861	0.705	1.017	-0.956	-1.378	-0.534
1234	0.795	0.649	0.968	0.811	0.654	0.975	-1.041	-1.469	-0.631	0.855	0.7	1.011	-0.973	-1.392	-0.551
1235	0.711	0.608	0.862	0.798	0.643	0.957	-1.075	-1.497	-0.678	0.851	0.696	1.005	-0.984	-1.403	-0.567
1236	0.681	0.517	0.826	0.79	0.637	0.945	-1.096	-1.513	-0.709	0.847	0.693	0.999	-0.994	-1.411	-0.583
1237	0.704	0.519	0.833	0.788	0.637	0.939	-1.101	-1.513	-0.725	0.844	0.691	0.995	-1.002	-1.416	-0.594
1238	0.738	0.624	0.854	0.791	0.641	0.939	-1.093	-1.503	-0.725	0.842	0.689	0.991	-1.008	-1.422	-0.605
1239	0.807	0.656	0.908	0.799	0.65	0.945	-1.072	-1.479	-0.709	0.841	0.689	0.988	-1.011	-1.422	-0.613
1240	0.88	0.726	1.037	0.808	0.66	0.953	-1.049	-1.453	-0.688	0.84	0.689	0.986	-1.013	-1.422	-0.618
1241	0.899	0.737	1.077	0.818	0.672	0.962	-1.023	-1.422	-0.665	0.84	0.69	0.984	-1.013	-1.419	-0.624
1242	0.873	0.722	1.08	0.828	0.683	0.97	-0.997	-1.393	-0.644	0.841	0.691	0.983	-1.011	-1.416	-0.626
1243	0.84	0.677	0.958	0.837	0.693	0.977	-0.973	-1.367	-0.626	0.842	0.693	0.982	-1.008	-1.411	-0.629
1244	0.811	0.682	0.954	0.845	0.702	0.982	-0.952	-1.343	-0.613	0.843	0.694	0.982	-1.005	-1.408	-0.629
1245	0.884	0.713	1.007	0.852	0.711	0.987	-0.934	-1.32	-0.6	0.844	0.696	0.981	-1.002	-1.403	-0.632
1246	0.849	0.741	0.972	0.858	0.719	0.99	-0.919	-1.299	-0.592	0.846	0.697	0.981	-0.997	-1.4	-0.632
1247	0.802	0.692	0.958	0.864	0.726	0.994	-0.903	-1.281	-0.581	0.847	0.698	0.981	-0.994	-1.397	-0.632
1248	0.905	0.753	1.018	0.87	0.731	0.997	-0.887	-1.268	-0.574	0.849	0.699	0.981	-0.989	-1.395	-0.632
1249	0.893	0.757	0.997	0.874	0.735	0.999	-0.877	-1.257	-0.568	0.85	0.7	0.981	-0.986	-1.392	-0.632
1250	0.882	0.731	0.996	0.877	0.737	1.001	-0.869	-1.252	-0.563	0.851	0.7	0.981	-0.984	-1.392	-0.632
1251	0.841	0.688	0.959	0.879	0.737	1.001	-0.864	-1.252	-0.563	0.852	0.7	0.981	-0.981	-1.392	-0.632
1252	0.867	0.737	1.023	0.88	0.735	1.001	-0.861	-1.257	-0.563	0.853	0.699	0.98	-0.978	-1.395	-0.635
1253	0.992	0.867	1.111	0.879	0.731	1	-0.864	-1.268	-0.566	0.853	0.698	0.98	-0.978	-1.397	-0.635
1254	0.799	0.66	0.927	0.876	0.724	0.997	-0.872	-1.286	-0.574	0.853	0.696	0.979	-0.978	-1.403	-0.637
1255	0.881	0.728	0.988	0.871	0.715	0.993	-0.885	-1.309	-0.584	0.852	0.694	0.978	-0.981	-1.408	-0.64
1256	0.908	0.716	0.997	0.866	0.704	0.988	-0.898	-1.338	-0.597	0.852	0.692	0.978	-0.981	-1.414	-0.64
1257	0.948	0.771	1.046	0.858	0.693	0.982	-0.919	-1.367	-0.613	0.851	0.69	0.977	-0.984	-1.419	-0.643
1258	0.802	0.67	0.965	0.85	0.68	0.976	-0.939	-1.401	-0.628	0.85	0.687	0.976	-0.986	-1.427	-0.645
1259	0.763	0.626	0.905	0.842	0.668	0.969	-0.96	-1.432	-0.647	0.849	0.685	0.975	-0.989	-1.433	-0.648
1260	0.856	0.596	0.951	0.835	0.657	0.964	-0.979	-1.461	-0.66	0.848	0.683	0.975	-0.992	-1.438	-0.648
1261	0.832	0.688	0.987	0.828	0.649	0.959	-0.997	-1.482	-0.673	0.848	0.682	0.975	-0.992	-1.441	-0.648
1262	0.898	0.657	1.072	0.823	0.643	0.955	-1.01	-1.497	-0.683	0.847	0.681	0.975	-0.994	-1.443	-0.648
1263	0.719	0.575	0.84	0.82	0.64	0.952	-1.018	-1.505	-0.691	0.848	0.681	0.975	-0.992	-1.443	-0.648
1264	0.781	0.575	0.899	0.819	0.641	0.95	-1.02	-1.503	-0.696	0.848	0.681	0.976	-0.992	-1.443	-0.645
1265	0.803	0.656	0.946	0.82	0.645	0.952	-1.018	-1.492	-0.691	0.849	0.682	0.977	-0.989	-1.441	-0.643
1266	0.82	0.621	0.959	0.824	0.652	0.955	-1.007	-1.474	-0.683	0.85	0.684	0.978	-0.986	-1.435	-0.64
1267	0.811	0.619	0.915	0.829	0.661	0.96	-0.994	-1.45	-0.67	0.852	0.686	0.98	-0.981	-1.43	-0.635
1268	0.876	0.694	0.984	0.836	0.673	0.967	-0.976	-1.419	-0.652	0.854	0.689	0.982	-0.975	-1.422	-0.629
1269	0.894	0.75	1.013	0.843	0.684	0.974	-0.958	-1.39	-0.634	0.856	0.692	0.985	-0.97	-1.414	-0.621
1270	0.806	0.689	0.908	0.85	0.695	0.982	-0.939	-1.362	-0.613	0.858	0.695	0.987	-0.965	-1.406	-0.616
1271	0.851	0.712	1.031	0.858	0.705	0.99	-0.919	-1.336	-0.592	0.86	0.698	0.99	-0.959	-1.397	-0.608
1272	0.891	0.768	1.055	0.865	0.714	0.997	-0.9	-1.312	-0.574	0.862	0.701	0.992	-0.954	-1.389	-0.602
1273	0.822	0.711	0.994	0.873	0.721	1.003	-0.879	-1.294	-0.558	0.864	0.703	0.994	-0.948	-1.384	-0.597
1274	0.877	0.732	1.024	0.88	0.726	1.008	-0.861	-1.281	-0.545	0.866	0.706	0.996	-0.943	-1.376	-0.591
1275	0.957	0.764	1.065	0.886	0.73	1.012	-0.845	-1.27	-0.535	0.867	0.708	0.997	-0.94	-1.37	-0.589
1276	0.88	0.723	0.98	0.891	0.732	1.014	-0.832	-1.265	-0.529	0.867	0.709	0.998	-0.94	-1.368	-0.586
1277	0.899	0.718	0.987	0.894	0.734	1.016	-0.825	-1.26	-0.524	0.867	0.711	0.998	-0.94	-1.362	-0.586
1278	0.883	0.696	1.014	0.896	0.734	1.018	-0.819	-1.26	-0.519	0.867	0.711	0.998	-0.94	-1.362	-0.586
1279	0.932	0.774	1.027	0.897	0.734	1.02	-0.817	-1.26	-0.514	0.866	0.712	0.998	-0.943	-1.36	-0.586
1280	0.84	0.718	0.906	0.896	0.734	1.022	-0.819	-1.26	-0.508	0.864	0.711	0.997	-0.948	-1.362	-0.589
1281	0.917	0.733	1.059	0.894	0.732	1.024	-0.825	-1.265	-0.503	0.862	0.711	0.995	-0.954	-1.362	-0.594
1282	0.867	0.71	1.016	0.89	0.731	1.024	-0.835	-1.268	-0.503	0.859	0.71	0.993	-0.962	-1.365	-0.599
1283	0.957	0.722	1.148	0.885	0.729	1.023	-0.848	-1.273	-0.506	0.855	0.708	0.99	-0.973	-1.37	-0.608
1284	0.871	0.733	1.039	0.879	0.726	1.019	-0.864	-1.281	-0.516	0.852	0.706	0.987	-0.981	-1.376	-0.616
1285	0.843	0.706	0.949	0.87	0.723	1.014	-0.887	-1.288	-0.529	0.847	0.704	0.983	-0.994	-1.381	-0.626
1286	0.878	0.765	1.019	0.861	0.719	1.006	-0.911	-1.299	-0.55	0.843	0.702	0.979	-1.005	-1.387	-0.637
1287	0.837	0.712	0.933	0.851	0.713	0.997	-0.937	-1.315	-0.574	0.838	0.7	0.975	-1.019	-1.392	-0.648
1288	0.85	0.722	0.996	0.84	0.707	0.987	-0.966	-1.33	-0.6	0.833	0.697	0.97	-1.032	-1.4	-0.662
1289	0.844	0.678	1.112	0.828	0.7	0.975	-0.997	-1.349	-0.631	0.829	0.695	0.966	-1.043	-1.406	-0.672
1290	0.84	0.708	1.005	0.815	0.692	0.96	-1.031	-1.369	-0.67	0.825	0.692	0.961	-1.054	-1.414	-0.686
1291	0.836	0.729	0.971	0.803	0.683	0.944	-1.062	-1.393	-0.712	0.821	0.69	0.957	-1.065	-1.419	-0.697
1292	0.855	0.732	0.958	0.79	0.675	0.928	-1.096	-1.414	-0.754	0.818	0.689	0.954	-1.073	-1.422	-0.705
1293	0.707	0.607	0.855	0.78	0.666	0.913	-1.122	-1.437	-0.793	0.816	0.688	0.951	-1.078	-1.424	-0.713
1294	0.74	0.665	0.826	0.772	0.659	0.901	-1.143	-1.456	-0.824	0.814	0.688	0.949	-1.084	-1.424	-0.718
1295	0.751	0.641	0.881	0.768	0.655	0.895	-1.153	-1.466	-0.84	0.814	0.688	0.949	-1.084	-1.424	-0.718
1296	0.725	0.615	0.839	0.768	0.653	0.893	-1.153	-1.471	-0.845	0.816	0.69	0.949	-1.078	-1.419	-0.718
1297	0.668	0.576	0.804	0.772	0.654	0.897	-1.143	-1.469	-0.835	0.818	0.693	0.952	-1.073	-1.411	-0.71
1298	0.78	0.646	0.857	0.781	0.659	0.907	-1.12	-1.456	-0.808	0.822	0.697	0.955	-1.062	-1.4	-0.702
1299	0.781	0.677	0.879	0.793	0.667	0.921	-1.088	-1.435	-0.772	0.827	0.702	0.96	-1.048	-1.387	-0.689
1300	0.731	0.616	0.885	0.808	0.677	0.939	-1.049	-1.409	-0.725	0.833	0.708	0.966	-1.032	-1.37	-0.672
1301	0.945	0.764	1.079	0.824	0.689	0.958	-1.007	-1.377	-0.675	0.84	0.715	0.973	-1.013	-1.351	-0.653
1302	0.856	0.692	0.985	0.84	0.702	0.976	-0.966	-1.343	-0.628	0.848	0.722	0.981	-0.992	-1.332	-0.632
1303	0.955	0.765	1.175	0.854	0.715	0.992	-0.929	-1.309	-0.587	0.856	0.731	0.989	-0.97	-1.308	-0.61
1304	0.912	0.751	1.044	0.866	0.728	1.005	-0.898	-1.276	-0.553	0.865	0.74	0.998	-0.946	-1.284	-0.586
1305	0.836	0.734	0.946	0.876	0.74	1.016	-0.872	-1.244	-0.524	0.874	0.75	1.007	-0.921	-1.257	-0.562
1306	0.893	0.786	1.079	0.885	0.752	1.025	-0.848	-1.213	-0.501	0.884	0.76	1.017	-0.894	-1.23	-0.534
1307	0.874	0.752	0.99	0.895	0.764	1.033	-0.822	-1.182	-0.48	0.893	0.77	1.026	-0.87	-1.203	-0.51
1308	0.899	0.755	1	0.904	0.775	1.041	-0.799	-1.153	-0.459	0.903	0.78	1.036	-0.843	-1.176	-0.483
1309	0.84	0.698	0.994	0.913	0.788	1.049	-0.775	-1.119	-0.438	0.914	0.791	1.046	-0.813	-1.146	-0.456
1310	0.95	0.865	1.128	0.923	0.8	1.058	-0.749	-1.088	-0.414	0.924	0.802	1.056	-0.786	-1.116	-0.429
1311	0.94	0.812	1.081	0.934	0.813	1.066	-0.72	-1.054	-0.394	0.934	0.812	1.066	-0.759	-1.089	-0.402
1312	0.867	0.77	0.94	0.944	0.825	1.074	-0.694	-1.022	-0.373	0.944	0.823	1.076	-0.732	-1.059	-0.375
1313	1.034	0.904	1.139	0.954	0.837	1.083	-0.668	-0.991	-0.349	0.953	0.832	1.086	-0.708	-1.035	-0.348
1314	1.012	0.891	1.169	0.964	0.848	1.091	-0.642	-0.962	-0.328	0.962	0.842	1.095	-0.683	-1.008	-0.323
1315	1.003	0.886	1.164	0.972	0.858	1.098	-0.621	-0.936	-0.31	0.971	0.85	1.104	-0.659	-0.986	-0.299
1316	0.934	0.823	1.028	0.98	0.867	1.105	-0.6	-0.913	-0.292	0.978	0.858	1.112	-0.64	-0.965	-0.277
1317	1.018	0.896	1.179	0.988	0.876	1.112	-0.579	-0.889	-0.274	0.986	0.865	1.12	-0.618	-0.946	-0.256
1318	0.95	0.816	1.043	0.996	0.885	1.12	-0.558	-0.866	-0.253	0.992	0.87	1.128	-0.602	-0.932	-0.234
1319	0.963	0.837	1.096	1.005	0.894	1.13	-0.535	-0.842	-0.227	0.997	0.875	1.134	-0.589	-0.919	-0.218
1320	0.953	0.853	1.087	1.015	0.904	1.141	-0.509	-0.816	-0.198	1.002	0.879	1.14	-0.575	-0.908	-0.202
1321	1.055	0.981	1.16	1.025	0.913	1.154	-0.483	-0.793	-0.164	1.005	0.881	1.145	-0.567	-0.902	-0.188
1322	0.999	0.938	1.099	1.035	0.92	1.167	-0.457	-0.775	-0.13	1.008	0.883	1.15	-0.559	-0.897	-0.175
1323	1.047	0.963	1.18	1.044	0.925	1.181	-0.433	-0.762	-0.094	1.009	0.882	1.152	-0.556	-0.9	-0.169
1324	1.027	0.834	1.156	1.051	0.927	1.194	-0.415	-0.756	-0.06	1.008	0.88	1.154	-0.559	-0.905	-0.164
1325	1.07	0.937	1.199	1.055	0.926	1.204	-0.405	-0.759	-0.034	1.007	0.877	1.154	-0.562	-0.913	-0.164
1326	1.114	0.999	1.27	1.055	0.921	1.21	-0.405	-0.772	-0.018	1.003	0.872	1.153	-0.572	-0.927	-0.167
1327	1.199	1.07	1.403	1.049	0.912	1.21	-0.42	-0.795	-0.018	0.998	0.865	1.15	-0.586	-0.946	-0.175
1328	1.072	0.892	1.265	1.039	0.897	1.204	-0.446	-0.835	-0.034	0.992	0.857	1.145	-0.602	-0.967	-0.188
1329	1.005	0.821	1.178	1.024	0.879	1.192	-0.486	-0.882	-0.065	0.984	0.848	1.138	-0.624	-0.992	-0.207
1330	0.974	0.826	1.22	1.006	0.859	1.174	-0.532	-0.934	-0.112	0.975	0.838	1.13	-0.648	-1.019	-0.229
1331	1.028	0.89	1.163	0.985	0.838	1.153	-0.587	-0.988	-0.167	0.964	0.827	1.12	-0.678	-1.048	-0.256
1332	0.92	0.803	1.088	0.963	0.815	1.13	-0.645	-1.048	-0.227	0.953	0.815	1.11	-0.708	-1.081	-0.283
1333	0.962	0.817	1.099	0.941	0.793	1.106	-0.702	-1.106	-0.289	0.942	0.803	1.098	-0.737	-1.113	-0.315
1334	0.914	0.83	1.028	0.92	0.771	1.083	-0.757	-1.163	-0.349	0.93	0.791	1.086	-0.77	-1.146	-0.348
1335	0.876	0.679	1.032	0.901	0.752	1.062	-0.806	-1.213	-0.404	0.918	0.779	1.074	-0.802	-1.178	-0.38
1336	0.765	0.585	0.961	0.884	0.736	1.044	-0.851	-1.255	-0.451	0.906	0.768	1.062	-0.835	-1.208	-0.413
1337	0.858	0.683	0.995	0.871	0.724	1.03	-0.885	-1.286	-0.488	0.895	0.757	1.05	-0.864	-1.238	-0.445
1338	0.806	0.685	0.982	0.861	0.717	1.018	-0.911	-1.304	-0.519	0.884	0.747	1.038	-0.894	-1.265	-0.478
1339	0.867	0.682	1.02	0.854	0.713	1.008	-0.929	-1.315	-0.545	0.873	0.738	1.026	-0.924	-1.289	-0.51
1340	0.821	0.697	0.998	0.847	0.71	0.999	-0.947	-1.322	-0.568	0.863	0.729	1.015	-0.951	-1.314	-0.54
1341	0.879	0.773	1.049	0.841	0.709	0.991	-0.963	-1.325	-0.589	0.854	0.721	1.005	-0.975	-1.335	-0.567
1342	0.864	0.759	0.98	0.835	0.706	0.982	-0.979	-1.333	-0.613	0.846	0.714	0.995	-0.997	-1.354	-0.594
1343	0.942	0.804	1.049	0.827	0.701	0.971	-0.999	-1.346	-0.641	0.838	0.708	0.986	-1.019	-1.37	-0.618
1344	0.893	0.758	1.016	0.817	0.694	0.96	-1.026	-1.364	-0.67	0.831	0.703	0.978	-1.038	-1.384	-0.64
1345	0.847	0.729	1.044	0.805	0.685	0.946	-1.057	-1.388	-0.707	0.825	0.698	0.97	-1.054	-1.397	-0.662
1346	0.785	0.703	0.884	0.793	0.675	0.933	-1.088	-1.414	-0.741	0.82	0.694	0.964	-1.067	-1.408	-0.678
1347	0.717	0.606	0.907	0.782	0.666	0.921	-1.117	-1.437	-0.772	0.816	0.692	0.959	-1.078	-1.414	-0.691
1348	0.713	0.586	0.864	0.774	0.659	0.912	-1.138	-1.456	-0.795	0.813	0.69	0.955	-1.086	-1.419	-0.702
1349	0.751	0.592	0.865	0.77	0.655	0.907	-1.148	-1.466	-0.808	0.812	0.69	0.953	-1.089	-1.419	-0.708
1350	0.7	0.606	0.793	0.77	0.656	0.906	-1.148	-1.463	-0.811	0.813	0.692	0.952	-1.086	-1.414	-0.71
1351	0.744	0.635	0.88	0.775	0.661	0.91	-1.135	-1.45	-0.801	0.814	0.694	0.952	-1.084	-1.408	-0.71
1352	0.777	0.685	0.925	0.784	0.67	0.919	-1.112	-1.427	-0.777	0.818	0.698	0.954	-1.073	-1.397	-0.705
1353	0.757	0.648	0.906	0.796	0.681	0.931	-1.08	-1.398	-0.746	0.822	0.703	0.958	-1.062	-1.384	-0.694
1354	0.769	0.655	0.895	0.81	0.694	0.945	-1.044	-1.364	-0.709	0.827	0.708	0.962	-1.048	-1.37	-0.683
1355	0.874	0.735	1.05	0.826	0.709	0.96	-1.002	-1.325	-0.67	0.833	0.715	0.967	-1.032	-1.351	-0.67
1356	0.934	0.806	1.057	0.841	0.723	0.975	-0.963	-1.288	-0.631	0.84	0.722	0.973	-1.013	-1.332	-0.653
1357	0.897	0.76	1.009	0.855	0.736	0.988	-0.926	-1.255	-0.597	0.848	0.73	0.979	-0.992	-1.311	-0.637
1358	0.882	0.771	1.033	0.867	0.748	1	-0.895	-1.223	-0.566	0.855	0.738	0.986	-0.973	-1.289	-0.618
1359	0.914	0.817	1.016	0.878	0.758	1.01	-0.866	-1.197	-0.54	0.863	0.746	0.993	-0.951	-1.268	-0.599
1360	0.821	0.728	0.912	0.887	0.766	1.02	-0.843	-1.176	-0.514	0.871	0.754	1	-0.929	-1.246	-0.58
1361	0.869	0.756	1.008	0.896	0.773	1.028	-0.819	-1.158	-0.493	0.879	0.762	1.008	-0.908	-1.224	-0.559
1362	0.955	0.824	1.16	0.904	0.78	1.036	-0.799	-1.14	-0.472	0.887	0.769	1.015	-0.886	-1.205	-0.54
1363	0.912	0.794	1.027	0.912	0.787	1.043	-0.778	-1.122	-0.454	0.894	0.777	1.022	-0.867	-1.184	-0.521
1364	0.896	0.712	1.046	0.919	0.794	1.048	-0.759	-1.103	-0.441	0.902	0.785	1.029	-0.845	-1.162	-0.502
1365	0.891	0.74	1.018	0.926	0.802	1.053	-0.741	-1.082	-0.428	0.909	0.792	1.035	-0.827	-1.143	-0.486
1366	0.907	0.793	1.038	0.933	0.811	1.057	-0.723	-1.059	-0.417	0.916	0.799	1.041	-0.808	-1.124	-0.47
1367	0.98	0.839	1.11	0.939	0.82	1.061	-0.707	-1.036	-0.407	0.922	0.806	1.047	-0.791	-1.105	-0.453
1368	0.967	0.867	1.052	0.944	0.828	1.064	-0.694	-1.015	-0.399	0.928	0.812	1.053	-0.775	-1.089	-0.437
1369	0.975	0.9	1.08	0.948	0.835	1.067	-0.684	-0.996	-0.391	0.933	0.818	1.058	-0.762	-1.073	-0.424
1370	0.926	0.84	1.025	0.951	0.84	1.069	-0.676	-0.983	-0.386	0.938	0.823	1.063	-0.748	-1.059	-0.41
1371	0.979	0.83	1.109	0.954	0.843	1.071	-0.668	-0.975	-0.38	0.942	0.827	1.068	-0.737	-1.048	-0.396
1372	0.935	0.839	1.085	0.955	0.846	1.073	-0.665	-0.968	-0.375	0.945	0.831	1.072	-0.729	-1.038	-0.386
1373	0.942	0.867	1.028	0.956	0.848	1.076	-0.663	-0.962	-0.368	0.948	0.834	1.076	-0.721	-1.03	-0.375
1374	0.954	0.805	1.048	0.957	0.848	1.078	-0.66	-0.962	-0.362	0.951	0.836	1.08	-0.713	-1.024	-0.364
1375	0.916	0.808	1.082	0.958	0.849	1.081	-0.658	-0.96	-0.354	0.953	0.838	1.083	-0.708	-1.019	-0.356
1376	1.039	0.902	1.187	0.958	0.848	1.084	-0.658	-0.962	-0.347	0.955	0.839	1.086	-0.702	-1.016	-0.348
1377	0.95	0.866	1.058	0.958	0.847	1.086	-0.658	-0.965	-0.341	0.956	0.839	1.088	-0.699	-1.016	-0.342
1378	1.031	0.926	1.132	0.957	0.844	1.088	-0.66	-0.973	-0.336	0.957	0.839	1.091	-0.697	-1.016	-0.334
1379	0.878	0.799	0.984	0.956	0.841	1.091	-0.663	-0.981	-0.328	0.957	0.839	1.093	-0.697	-1.016	-0.329
1380	0.89	0.779	1.057	0.956	0.837	1.094	-0.663	-0.991	-0.32	0.957	0.838	1.094	-0.697	-1.019	-0.326
1381	0.956	0.822	1.113	0.956	0.835	1.098	-0.663	-0.996	-0.31	0.957	0.837	1.096	-0.697	-1.021	-0.321
1382	0.969	0.852	1.148	0.958	0.833	1.103	-0.658	-1.002	-0.297	0.957	0.835	1.097	-0.697	-1.027	-0.318
1383	0.942	0.808	1.088	0.959	0.831	1.107	-0.655	-1.007	-0.287	0.957	0.833	1.098	-0.697	-1.032	-0.315
1384	0.983	0.817	1.12	0.96	0.831	1.11	-0.652	-1.007	-0.279	0.956	0.831	1.098	-0.699	-1.038	-0.315
1385	0.985	0.762	1.135	0.961	0.831	1.113	-0.65	-1.007	-0.271	0.955	0.829	1.098	-0.702	-1.043	-0.315
1386	0.918	0.836	0.993	0.961	0.831	1.115	-0.65	-1.007	-0.266	0.954	0.827	1.098	-0.705	-1.048	-0.315
1387	0.964	0.863	1.096	0.959	0.83	1.117	-0.655	-1.009	-0.261	0.953	0.824	1.097	-0.708	-1.057	-0.318
1388	1.039	0.913	1.214	0.957	0.828	1.116	-0.66	-1.015	-0.263	0.951	0.821	1.096	-0.713	-1.065	-0.321
1389	1.011	0.882	1.272	0.953	0.824	1.112	-0.671	-1.025	-0.274	0.949	0.818	1.095	-0.718	-1.073	-0.323
1390	0.965	0.845	1.203	0.947	0.818	1.105	-0.686	-1.041	-0.292	0.948	0.815	1.093	-0.721	-1.081	-0.329
1391	0.89	0.768	1.036	0.941	0.812	1.095	-0.702	-1.056	-0.318	0.946	0.812	1.09	-0.726	-1.089	-0.337
1392	0.859	0.739	0.966	0.936	0.805	1.085	-0.715	-1.075	-0.344	0.945	0.809	1.088	-0.729	-1.097	-0.342
1393	0.894	0.761	1.015	0.932	0.799	1.076	-0.725	-1.09	-0.368	0.944	0.806	1.086	-0.732	-1.105	-0.348
1394	0.931	0.81	1.069	0.929	0.793	1.069	-0.733	-1.106	-0.386	0.943	0.804	1.084	-0.735	-1.111	-0.353
1395	0.994	0.863	1.096	0.927	0.788	1.063	-0.739	-1.119	-0.401	0.942	0.801	1.083	-0.737	-1.119	-0.356
1396	0.928	0.783	1.051	0.925	0.783	1.059	-0.744	-1.132	-0.412	0.942	0.799	1.081	-0.737	-1.124	-0.361
1397	0.925	0.734	1.071	0.924	0.779	1.056	-0.746	-1.142	-0.42	0.941	0.798	1.081	-0.74	-1.127	-0.361
1398	0.955	0.804	1.086	0.924	0.776	1.054	-0.746	-1.15	-0.425	0.942	0.796	1.08	-0.737	-1.132	-0.364
1399	0.929	0.81	1.056	0.925	0.775	1.054	-0.744	-1.153	-0.425	0.942	0.795	1.08	-0.737	-1.135	-0.364
1400	0.873	0.717	1.019	0.928	0.775	1.056	-0.736	-1.153	-0.42	0.943	0.795	1.08	-0.735	-1.135	-0.364
1401	0.894	0.725	1.046	0.932	0.777	1.061	-0.725	-1.148	-0.407	0.945	0.795	1.081	-0.729	-1.135	-0.361
1402	0.884	0.785	0.957	0.939	0.782	1.068	-0.707	-1.135	-0.388	0.946	0.795	1.083	-0.726	-1.135	-0.356
1403	0.948	0.755	1.074	0.948	0.789	1.078	-0.684	-1.116	-0.362	0.948	0.796	1.085	-0.721	-1.132	-0.35
1404	0.924	0.743	1.048	0.958	0.798	1.09	-0.658	-1.093	-0.331	0.95	0.797	1.087	-0.716	-1.13	-0.345
1405	0.951	0.769	1.075	0.968	0.807	1.103	-0.632	-1.069	-0.297	0.952	0.799	1.09	-0.71	-1.124	-0.337
1406	1.055	0.868	1.219	0.977	0.817	1.114	-0.608	-1.043	-0.268	0.954	0.8	1.092	-0.705	-1.122	-0.331
1407	1.02	0.877	1.164	0.983	0.825	1.123	-0.592	-1.022	-0.245	0.956	0.802	1.094	-0.699	-1.116	-0.326
1408	0.991	0.867	1.13	0.988	0.831	1.129	-0.579	-1.007	-0.229	0.958	0.803	1.097	-0.694	-1.113	-0.318
1409	1.058	0.914	1.227	0.989	0.834	1.131	-0.577	-0.999	-0.224	0.959	0.805	1.099	-0.691	-1.108	-0.313
1410	1.002	0.863	1.159	0.986	0.833	1.129	-0.585	-1.002	-0.229	0.961	0.806	1.101	-0.686	-1.105	-0.307
1411	1.051	0.875	1.192	0.982	0.829	1.123	-0.595	-1.012	-0.245	0.962	0.807	1.102	-0.683	-1.102	-0.304
1412	0.94	0.777	1.103	0.975	0.824	1.115	-0.613	-1.025	-0.266	0.963	0.807	1.104	-0.68	-1.102	-0.299
1413	0.957	0.793	1.108	0.967	0.817	1.106	-0.634	-1.043	-0.289	0.963	0.808	1.106	-0.68	-1.1	-0.294
1414	0.894	0.773	0.994	0.96	0.811	1.097	-0.652	-1.059	-0.313	0.965	0.809	1.108	-0.675	-1.097	-0.288
1415	0.968	0.816	1.075	0.953	0.805	1.09	-0.671	-1.075	-0.331	0.966	0.811	1.111	-0.672	-1.092	-0.28
1416	0.927	0.76	1.051	0.948	0.801	1.085	-0.684	-1.085	-0.344	0.968	0.812	1.113	-0.667	-1.089	-0.275
1417	0.946	0.803	1.125	0.944	0.798	1.083	-0.694	-1.093	-0.349	0.97	0.814	1.117	-0.662	-1.084	-0.264
1418	0.929	0.806	1.044	0.943	0.795	1.083	-0.697	-1.101	-0.349	0.973	0.817	1.121	-0.653	-1.076	-0.253
1419	0.946	0.808	1.125	0.943	0.795	1.085	-0.697	-1.101	-0.344	0.976	0.82	1.126	-0.645	-1.067	-0.24
1420	0.936	0.756	1.057	0.946	0.795	1.091	-0.689	-1.101	-0.328	0.98	0.824	1.131	-0.635	-1.057	-0.226
1421	0.925	0.792	1.022	0.95	0.798	1.099	-0.679	-1.093	-0.308	0.984	0.828	1.137	-0.624	-1.046	-0.21
1422	0.945	0.832	1.062	0.957	0.801	1.111	-0.66	-1.085	-0.276	0.989	0.832	1.143	-0.61	-1.035	-0.193
1423	0.909	0.765	1.077	0.966	0.806	1.125	-0.637	-1.072	-0.24	0.995	0.838	1.15	-0.594	-1.019	-0.175
1424	1.025	0.885	1.219	0.976	0.812	1.141	-0.611	-1.056	-0.198	1.001	0.843	1.157	-0.578	-1.005	-0.156
1425	1.041	0.86	1.252	0.988	0.82	1.156	-0.579	-1.036	-0.159	1.007	0.849	1.164	-0.562	-0.989	-0.137
1426	0.951	0.704	1.122	0.999	0.829	1.17	-0.551	-1.012	-0.122	1.013	0.856	1.17	-0.545	-0.97	-0.12
1427	1.009	0.835	1.213	1.011	0.84	1.183	-0.519	-0.983	-0.088	1.019	0.862	1.177	-0.529	-0.954	-0.101
1428	1.042	0.826	1.216	1.023	0.852	1.195	-0.488	-0.952	-0.057	1.025	0.869	1.182	-0.513	-0.935	-0.088
1429	1.049	0.887	1.222	1.034	0.866	1.204	-0.459	-0.915	-0.034	1.031	0.876	1.187	-0.496	-0.916	-0.075
1430	1.04	0.87	1.18	1.045	0.881	1.212	-0.431	-0.876	-0.013	1.036	0.883	1.192	-0.483	-0.897	-0.061
1431	1.051	0.899	1.235	1.055	0.896	1.219	-0.405	-0.837	0.006	1.041	0.889	1.195	-0.47	-0.881	-0.053
1432	1.025	0.894	1.165	1.064	0.91	1.224	-0.381	-0.801	0.019	1.045	0.895	1.198	-0.459	-0.864	-0.045
1433	1.063	0.951	1.246	1.071	0.922	1.228	-0.363	-0.769	0.029	1.048	0.9	1.199	-0.451	-0.851	-0.042
1434	1.135	0.973	1.273	1.078	0.934	1.229	-0.345	-0.738	0.032	1.05	0.904	1.199	-0.445	-0.84	-0.042
1435	1.107	0.914	1.301	1.082	0.942	1.229	-0.334	-0.717	0.032	1.051	0.907	1.198	-0.442	-0.832	-0.045
1436	1.065	0.953	1.177	1.083	0.948	1.226	-0.331	-0.701	0.024	1.051	0.909	1.196	-0.442	-0.827	-0.05
1437	1.105	0.988	1.205	1.083	0.952	1.222	-0.331	-0.691	0.013	1.049	0.91	1.193	-0.448	-0.824	-0.058
1438	1.071	0.966	1.169	1.08	0.952	1.217	-0.339	-0.691	0	1.047	0.909	1.188	-0.453	-0.827	-0.072
1439	1.086	0.99	1.265	1.076	0.949	1.211	-0.35	-0.699	-0.015	1.043	0.907	1.182	-0.464	-0.832	-0.088
1440	1.084	0.938	1.191	1.07	0.944	1.204	-0.365	-0.712	-0.034	1.038	0.903	1.175	-0.478	-0.843	-0.107
1441	1.039	0.938	1.132	1.062	0.935	1.196	-0.386	-0.735	-0.054	1.032	0.898	1.166	-0.494	-0.856	-0.131
1442	1.042	0.905	1.195	1.053	0.925	1.187	-0.41	-0.762	-0.078	1.025	0.892	1.157	-0.513	-0.873	-0.156
1443	1.031	0.883	1.166	1.044	0.914	1.177	-0.433	-0.79	-0.104	1.017	0.885	1.147	-0.534	-0.891	-0.183
1444	1.016	0.922	1.213	1.033	0.902	1.166	-0.462	-0.822	-0.133	1.008	0.877	1.136	-0.559	-0.913	-0.213
1445	1.082	0.889	1.248	1.021	0.888	1.151	-0.493	-0.858	-0.172	0.998	0.868	1.124	-0.586	-0.938	-0.245
1446	0.947	0.837	1.055	1.008	0.874	1.135	-0.527	-0.895	-0.214	0.987	0.858	1.111	-0.616	-0.965	-0.28
1447	1.048	0.906	1.168	0.993	0.86	1.117	-0.566	-0.931	-0.261	0.976	0.848	1.098	-0.645	-0.992	-0.315
1448	0.928	0.782	1.045	0.978	0.845	1.097	-0.605	-0.97	-0.313	0.964	0.837	1.085	-0.678	-1.021	-0.35
1449	0.967	0.84	1.091	0.961	0.829	1.077	-0.65	-1.012	-0.365	0.952	0.826	1.071	-0.71	-1.051	-0.388
1450	1.02	0.921	1.125	0.944	0.813	1.055	-0.694	-1.054	-0.422	0.939	0.814	1.058	-0.745	-1.084	-0.424
1451	0.939	0.763	1.046	0.925	0.797	1.033	-0.744	-1.095	-0.48	0.927	0.803	1.045	-0.778	-1.113	-0.459
1452	0.915	0.729	0.997	0.905	0.78	1.011	-0.796	-1.14	-0.537	0.915	0.792	1.033	-0.81	-1.143	-0.491
1453	0.877	0.759	0.968	0.886	0.764	0.99	-0.845	-1.182	-0.592	0.904	0.781	1.021	-0.84	-1.173	-0.524
1454	0.867	0.789	0.982	0.867	0.749	0.972	-0.895	-1.221	-0.639	0.893	0.77	1.011	-0.87	-1.203	-0.551
1455	0.837	0.767	0.928	0.85	0.734	0.955	-0.939	-1.26	-0.683	0.883	0.761	1.001	-0.897	-1.227	-0.578
1456	0.795	0.71	0.901	0.835	0.721	0.942	-0.979	-1.294	-0.717	0.874	0.752	0.994	-0.921	-1.251	-0.597
1457	0.842	0.727	0.971	0.824	0.709	0.933	-1.007	-1.325	-0.741	0.866	0.744	0.988	-0.943	-1.273	-0.613
1458	0.763	0.62	0.865	0.815	0.699	0.928	-1.031	-1.351	-0.754	0.86	0.737	0.983	-0.959	-1.292	-0.626
1459	0.765	0.68	0.869	0.81	0.693	0.927	-1.044	-1.367	-0.756	0.855	0.731	0.981	-0.973	-1.308	-0.632
1460	0.792	0.662	0.892	0.808	0.689	0.93	-1.049	-1.377	-0.748	0.851	0.726	0.98	-0.984	-1.322	-0.635
1461	0.838	0.682	0.981	0.81	0.689	0.936	-1.044	-1.377	-0.733	0.849	0.723	0.98	-0.989	-1.33	-0.635
1462	0.765	0.634	0.863	0.814	0.691	0.945	-1.033	-1.372	-0.709	0.848	0.721	0.983	-0.992	-1.335	-0.626
1463	0.859	0.73	1.005	0.819	0.695	0.955	-1.02	-1.362	-0.683	0.848	0.72	0.986	-0.992	-1.338	-0.618
1464	0.895	0.766	1.115	0.826	0.7	0.965	-1.002	-1.349	-0.657	0.85	0.72	0.991	-0.986	-1.338	-0.605
1465	0.875	0.721	1.169	0.833	0.706	0.975	-0.984	-1.333	-0.631	0.852	0.721	0.997	-0.981	-1.335	-0.589
1466	0.799	0.707	0.873	0.841	0.712	0.985	-0.963	-1.317	-0.605	0.856	0.723	1.004	-0.97	-1.33	-0.57
1467	0.833	0.716	0.917	0.85	0.719	0.996	-0.939	-1.299	-0.576	0.86	0.726	1.012	-0.959	-1.322	-0.548
1468	0.795	0.651	0.896	0.86	0.727	1.011	-0.913	-1.278	-0.537	0.866	0.73	1.021	-0.943	-1.311	-0.524
1469	0.887	0.77	0.975	0.872	0.735	1.028	-0.882	-1.257	-0.493	0.872	0.734	1.03	-0.927	-1.3	-0.499
1470	0.894	0.816	1.012	0.884	0.743	1.049	-0.851	-1.236	-0.438	0.878	0.739	1.04	-0.91	-1.286	-0.472
1471	0.892	0.712	1.002	0.897	0.751	1.072	-0.817	-1.215	-0.378	0.885	0.744	1.05	-0.891	-1.273	-0.445
1472	0.894	0.768	1.106	0.91	0.759	1.095	-0.783	-1.195	-0.318	0.892	0.75	1.06	-0.873	-1.257	-0.418
1473	0.887	0.67	1.158	0.922	0.767	1.116	-0.752	-1.174	-0.263	0.899	0.755	1.07	-0.854	-1.243	-0.391
1474	0.969	0.845	1.183	0.933	0.775	1.134	-0.723	-1.153	-0.216	0.906	0.761	1.079	-0.835	-1.227	-0.367
1475	0.981	0.782	1.308	0.941	0.782	1.146	-0.702	-1.135	-0.185	0.913	0.767	1.087	-0.816	-1.211	-0.345
1476	1.056	0.843	1.328	0.947	0.788	1.152	-0.686	-1.119	-0.169	0.92	0.774	1.095	-0.797	-1.192	-0.323
1477	0.956	0.819	1.059	0.951	0.792	1.151	-0.676	-1.109	-0.172	0.926	0.78	1.101	-0.781	-1.176	-0.307
1478	0.979	0.838	1.225	0.952	0.796	1.146	-0.673	-1.098	-0.185	0.932	0.785	1.107	-0.764	-1.162	-0.291
1479	0.894	0.767	1.108	0.952	0.799	1.138	-0.673	-1.09	-0.206	0.938	0.791	1.111	-0.748	-1.146	-0.28
1480	0.958	0.758	1.138	0.953	0.803	1.129	-0.671	-1.08	-0.229	0.943	0.797	1.115	-0.735	-1.13	-0.269
1481	0.898	0.744	1.023	0.954	0.808	1.121	-0.668	-1.067	-0.25	0.949	0.803	1.119	-0.718	-1.113	-0.259
1482	0.947	0.812	1.067	0.956	0.814	1.114	-0.663	-1.051	-0.268	0.954	0.808	1.122	-0.705	-1.1	-0.25
1483	0.936	0.824	1.082	0.959	0.822	1.111	-0.655	-1.03	-0.276	0.959	0.814	1.126	-0.691	-1.084	-0.24
1484	0.906	0.766	1.012	0.964	0.83	1.111	-0.642	-1.009	-0.276	0.963	0.819	1.129	-0.68	-1.07	-0.231
1485	0.971	0.864	1.086	0.971	0.838	1.115	-0.624	-0.988	-0.266	0.968	0.825	1.132	-0.667	-1.054	-0.223
1486	0.984	0.845	1.116	0.977	0.846	1.121	-0.608	-0.968	-0.25	0.973	0.83	1.135	-0.653	-1.04	-0.215
1487	0.977	0.846	1.11	0.984	0.853	1.129	-0.59	-0.949	-0.229	0.977	0.834	1.138	-0.643	-1.03	-0.207
1488	0.979	0.868	1.15	0.989	0.857	1.136	-0.577	-0.939	-0.211	0.981	0.839	1.141	-0.632	-1.016	-0.199
1489	1.097	0.976	1.216	0.993	0.859	1.143	-0.566	-0.934	-0.193	0.985	0.843	1.144	-0.621	-1.005	-0.191
1490	1.088	0.99	1.27	0.994	0.857	1.148	-0.564	-0.939	-0.18	0.989	0.847	1.146	-0.61	-0.994	-0.185
1491	0.992	0.861	1.191	0.993	0.852	1.149	-0.566	-0.952	-0.177	0.992	0.85	1.149	-0.602	-0.986	-0.177
1492	0.997	0.823	1.134	0.991	0.845	1.148	-0.572	-0.97	-0.18	0.995	0.853	1.151	-0.594	-0.978	-0.172
1493	0.976	0.824	1.204	0.988	0.839	1.146	-0.579	-0.986	-0.185	0.999	0.857	1.153	-0.583	-0.967	-0.167
1494	0.919	0.723	1.055	0.986	0.835	1.144	-0.585	-0.996	-0.19	1.002	0.861	1.155	-0.575	-0.956	-0.161
1495	0.942	0.785	1.071	0.985	0.834	1.142	-0.587	-0.999	-0.195	1.005	0.865	1.157	-0.567	-0.946	-0.156
1496	1	0.775	1.178	0.987	0.836	1.142	-0.582	-0.994	-0.195	1.009	0.869	1.159	-0.556	-0.935	-0.15
1497	1	0.85	1.165	0.99	0.842	1.143	-0.574	-0.978	-0.193	1.013	0.874	1.161	-0.545	-0.921	-0.145
1498	0.922	0.792	1.054	0.996	0.851	1.147	-0.558	-0.955	-0.182	1.017	0.879	1.164	-0.534	-0.908	-0.137
1499	0.988	0.872	1.134	1.003	0.863	1.152	-0.54	-0.923	-0.169	1.021	0.884	1.166	-0.524	-0.894	-0.131
1500	1.02	0.922	1.138	1.012	0.875	1.159	-0.517	-0.892	-0.151	1.025	0.889	1.169	-0.513	-0.881	-0.123
1501	1.059	0.96	1.223	1.022	0.888	1.167	-0.491	-0.858	-0.13	1.029	0.895	1.172	-0.502	-0.864	-0.115
1502	1.027	0.913	1.174	1.032	0.899	1.175	-0.465	-0.829	-0.109	1.033	0.9	1.174	-0.491	-0.851	-0.11
1503	1.011	0.846	1.135	1.043	0.911	1.183	-0.436	-0.798	-0.088	1.037	0.905	1.177	-0.48	-0.837	-0.101
1504	1.086	0.949	1.227	1.052	0.922	1.191	-0.412	-0.769	-0.067	1.041	0.91	1.179	-0.47	-0.824	-0.096
1505	1.081	0.91	1.206	1.061	0.932	1.199	-0.389	-0.743	-0.047	1.044	0.914	1.18	-0.461	-0.813	-0.093
1506	1.046	0.912	1.162	1.068	0.941	1.204	-0.371	-0.72	-0.034	1.047	0.918	1.182	-0.453	-0.802	-0.088
1507	1.106	0.995	1.344	1.073	0.948	1.208	-0.358	-0.701	-0.023	1.049	0.921	1.183	-0.448	-0.794	-0.085
1508	1.056	0.961	1.155	1.077	0.954	1.209	-0.347	-0.686	-0.021	1.051	0.924	1.183	-0.442	-0.786	-0.085
1509	1.046	0.903	1.147	1.078	0.957	1.209	-0.345	-0.678	-0.021	1.052	0.926	1.183	-0.44	-0.781	-0.085
1510	1.177	1.06	1.307	1.078	0.957	1.206	-0.345	-0.678	-0.028	1.053	0.928	1.182	-0.437	-0.775	-0.088
1511	1.064	0.974	1.175	1.075	0.955	1.201	-0.352	-0.683	-0.041	1.053	0.928	1.181	-0.437	-0.775	-0.091
1512	1.14	1.03	1.232	1.069	0.95	1.194	-0.368	-0.696	-0.06	1.053	0.928	1.18	-0.437	-0.775	-0.093
1513	1.078	0.955	1.268	1.062	0.942	1.186	-0.386	-0.717	-0.08	1.052	0.928	1.178	-0.44	-0.775	-0.099
1514	1.044	0.893	1.178	1.054	0.934	1.176	-0.407	-0.738	-0.107	1.051	0.927	1.176	-0.442	-0.778	-0.104
1515	1.004	0.873	1.099	1.046	0.926	1.166	-0.428	-0.759	-0.133	1.05	0.926	1.174	-0.445	-0.781	-0.11
1516	0.994	0.891	1.124	1.039	0.919	1.157	-0.446	-0.777	-0.156	1.049	0.924	1.172	-0.448	-0.786	-0.115
1517	1.019	0.877	1.195	1.035	0.915	1.15	-0.457	-0.788	-0.174	1.048	0.923	1.171	-0.451	-0.789	-0.118
1518	0.922	0.808	0.986	1.033	0.912	1.146	-0.462	-0.795	-0.185	1.046	0.921	1.169	-0.456	-0.794	-0.123
1519	1.055	0.921	1.132	1.032	0.912	1.145	-0.465	-0.795	-0.188	1.046	0.92	1.168	-0.456	-0.797	-0.126
1520	1.046	0.949	1.13	1.033	0.912	1.146	-0.462	-0.795	-0.185	1.045	0.918	1.168	-0.459	-0.802	-0.126
1521	1.07	0.961	1.2	1.035	0.912	1.149	-0.457	-0.795	-0.177	1.044	0.917	1.168	-0.461	-0.805	-0.126
1522	1.083	0.966	1.175	1.037	0.912	1.153	-0.451	-0.795	-0.167	1.043	0.915	1.168	-0.464	-0.81	-0.126
1523	0.958	0.834	1.121	1.038	0.911	1.157	-0.449	-0.798	-0.156	1.043	0.914	1.168	-0.464	-0.813	-0.126
1524	1.067	0.928	1.18	1.039	0.909	1.161	-0.446	-0.803	-0.146	1.043	0.913	1.168	-0.464	-0.816	-0.126
1525	1.072	0.925	1.203	1.039	0.907	1.164	-0.446	-0.808	-0.138	1.043	0.912	1.169	-0.464	-0.818	-0.123
1526	1.085	0.975	1.188	1.038	0.902	1.166	-0.449	-0.822	-0.133	1.042	0.911	1.17	-0.467	-0.821	-0.12
1527	1.134	1.022	1.273	1.035	0.897	1.167	-0.457	-0.835	-0.13	1.042	0.91	1.171	-0.467	-0.824	-0.118
1528	1.055	0.893	1.185	1.032	0.891	1.166	-0.465	-0.85	-0.133	1.043	0.91	1.171	-0.464	-0.824	-0.118
1529	0.931	0.766	1.09	1.029	0.886	1.166	-0.472	-0.863	-0.133	1.043	0.91	1.172	-0.464	-0.824	-0.115
1530	1.009	0.84	1.154	1.028	0.884	1.167	-0.475	-0.868	-0.13	1.044	0.911	1.173	-0.461	-0.821	-0.112
1531	0.976	0.847	1.148	1.029	0.885	1.17	-0.472	-0.866	-0.122	1.045	0.912	1.174	-0.459	-0.818	-0.11
1532	0.964	0.79	1.09	1.034	0.89	1.175	-0.459	-0.853	-0.109	1.046	0.913	1.176	-0.456	-0.816	-0.104
1533	0.971	0.827	1.105	1.041	0.899	1.182	-0.441	-0.829	-0.091	1.048	0.916	1.177	-0.451	-0.808	-0.101
1534	1.003	0.924	1.109	1.05	0.911	1.192	-0.418	-0.798	-0.065	1.049	0.918	1.178	-0.448	-0.802	-0.099
1535	1.114	0.927	1.267	1.061	0.923	1.202	-0.389	-0.767	-0.039	1.051	0.921	1.179	-0.442	-0.794	-0.096
1536	1.106	1	1.226	1.07	0.935	1.211	-0.365	-0.735	-0.015	1.053	0.924	1.18	-0.437	-0.786	-0.093
1537	1.185	1.061	1.294	1.077	0.944	1.217	-0.347	-0.712	0	1.055	0.927	1.18	-0.432	-0.778	-0.093
1538	1.099	0.962	1.288	1.081	0.95	1.219	-0.337	-0.696	0.006	1.056	0.929	1.18	-0.429	-0.772	-0.093
1539	1.157	1.023	1.308	1.081	0.953	1.217	-0.337	-0.688	0	1.057	0.932	1.18	-0.426	-0.764	-0.093
1540	1.111	0.994	1.276	1.079	0.953	1.21	-0.342	-0.688	-0.018	1.058	0.934	1.178	-0.424	-0.759	-0.099
1541	1.02	0.856	1.22	1.074	0.951	1.199	-0.355	-0.694	-0.047	1.058	0.936	1.177	-0.424	-0.753	-0.101
1542	1.099	0.991	1.176	1.068	0.949	1.186	-0.371	-0.699	-0.08	1.059	0.937	1.175	-0.421	-0.751	-0.107
1543	0.977	0.873	1.045	1.062	0.946	1.173	-0.386	-0.707	-0.114	1.059	0.939	1.173	-0.421	-0.745	-0.112
1544	1.018	0.914	1.105	1.057	0.944	1.162	-0.399	-0.712	-0.143	1.059	0.94	1.172	-0.421	-0.743	-0.115
1545	1.064	0.952	1.142	1.053	0.943	1.152	-0.41	-0.715	-0.169	1.06	0.942	1.171	-0.418	-0.737	-0.118
1546	1.028	0.908	1.158	1.049	0.942	1.144	-0.42	-0.717	-0.19	1.061	0.943	1.17	-0.415	-0.735	-0.12
1547	1.068	0.948	1.159	1.046	0.941	1.137	-0.428	-0.72	-0.208	1.061	0.944	1.17	-0.415	-0.732	-0.12
1548	1.082	0.991	1.156	1.044	0.941	1.133	-0.433	-0.72	-0.219	1.063	0.946	1.17	-0.41	-0.726	-0.12
1549	1.036	0.914	1.093	1.042	0.94	1.13	-0.438	-0.722	-0.227	1.064	0.947	1.171	-0.407	-0.724	-0.118
1550	1.026	0.963	1.101	1.041	0.939	1.129	-0.441	-0.725	-0.229	1.066	0.948	1.173	-0.402	-0.721	-0.112
1551	1.038	0.953	1.165	1.042	0.938	1.131	-0.438	-0.728	-0.224	1.067	0.949	1.176	-0.399	-0.718	-0.104
1552	1.052	0.935	1.124	1.043	0.937	1.134	-0.436	-0.73	-0.216	1.07	0.951	1.179	-0.391	-0.713	-0.096
1553	1.096	0.995	1.211	1.045	0.936	1.14	-0.431	-0.733	-0.2	1.072	0.952	1.183	-0.386	-0.71	-0.085
1554	0.997	0.909	1.094	1.049	0.935	1.147	-0.42	-0.735	-0.182	1.075	0.953	1.187	-0.377	-0.708	-0.075
1555	0.997	0.88	1.089	1.054	0.935	1.158	-0.407	-0.735	-0.154	1.077	0.954	1.192	-0.372	-0.705	-0.061
1556	1.039	0.902	1.132	1.062	0.938	1.171	-0.386	-0.728	-0.12	1.08	0.955	1.197	-0.364	-0.702	-0.047
1557	1.096	0.957	1.198	1.072	0.942	1.187	-0.36	-0.717	-0.078	1.083	0.956	1.202	-0.356	-0.699	-0.034
1558	1.048	0.93	1.149	1.082	0.947	1.204	-0.334	-0.704	-0.034	1.086	0.957	1.207	-0.348	-0.697	-0.02
1559	1.101	0.889	1.238	1.093	0.954	1.222	-0.305	-0.686	0.013	1.089	0.958	1.212	-0.34	-0.694	-0.007
1560	1.114	0.982	1.291	1.104	0.962	1.239	-0.277	-0.665	0.058	1.091	0.958	1.217	-0.334	-0.694	0.007
1561	1.08	0.967	1.233	1.115	0.97	1.255	-0.248	-0.644	0.1	1.092	0.958	1.22	-0.331	-0.694	0.015
1562	1.127	0.946	1.267	1.124	0.978	1.269	-0.225	-0.623	0.136	1.093	0.958	1.223	-0.329	-0.694	0.023
1563	1.13	0.994	1.275	1.13	0.984	1.28	-0.209	-0.608	0.165	1.092	0.957	1.224	-0.331	-0.697	0.026
1564	1.184	1.06	1.319	1.134	0.987	1.286	-0.199	-0.6	0.18	1.091	0.955	1.225	-0.334	-0.702	0.028
1565	1.197	1.045	1.383	1.134	0.986	1.288	-0.199	-0.602	0.186	1.089	0.952	1.223	-0.34	-0.71	0.023
1566	1.159	1.032	1.3	1.13	0.982	1.284	-0.209	-0.613	0.175	1.085	0.948	1.221	-0.35	-0.721	0.018
1567	1.169	1.026	1.312	1.122	0.975	1.275	-0.23	-0.631	0.152	1.081	0.944	1.216	-0.361	-0.732	0.004
1568	1.102	0.951	1.306	1.111	0.964	1.261	-0.259	-0.66	0.115	1.075	0.938	1.211	-0.377	-0.748	-0.01
1569	1.112	0.915	1.28	1.097	0.952	1.243	-0.295	-0.691	0.068	1.069	0.932	1.203	-0.394	-0.764	-0.031
1570	1.086	0.887	1.231	1.081	0.939	1.223	-0.337	-0.725	0.016	1.061	0.925	1.195	-0.415	-0.783	-0.053
1571	0.98	0.883	1.066	1.064	0.927	1.202	-0.381	-0.756	-0.039	1.053	0.918	1.186	-0.437	-0.802	-0.077
1572	1.016	0.886	1.156	1.048	0.914	1.182	-0.423	-0.79	-0.091	1.045	0.91	1.176	-0.459	-0.824	-0.104
1573	1.016	0.924	1.111	1.033	0.902	1.162	-0.462	-0.822	-0.143	1.036	0.902	1.166	-0.483	-0.845	-0.131
1574	1.001	0.885	1.111	1.018	0.891	1.144	-0.501	-0.85	-0.19	1.027	0.894	1.156	-0.507	-0.867	-0.158
1575	1.118	1.018	1.241	1.003	0.878	1.127	-0.54	-0.884	-0.234	1.017	0.886	1.145	-0.534	-0.889	-0.188
1576	0.947	0.75	1.107	0.988	0.865	1.11	-0.579	-0.918	-0.279	1.008	0.877	1.134	-0.559	-0.913	-0.218
1577	1.049	0.958	1.154	0.975	0.853	1.094	-0.613	-0.949	-0.32	0.999	0.869	1.123	-0.583	-0.935	-0.248
1578	0.938	0.832	1.08	0.962	0.841	1.079	-0.647	-0.981	-0.36	0.99	0.861	1.113	-0.608	-0.956	-0.275
1579	0.851	0.767	0.974	0.951	0.83	1.066	-0.676	-1.009	-0.394	0.981	0.853	1.103	-0.632	-0.978	-0.302
1580	0.889	0.735	1.008	0.944	0.822	1.056	-0.694	-1.03	-0.42	0.973	0.845	1.094	-0.653	-1	-0.326
1581	0.897	0.802	0.962	0.939	0.816	1.05	-0.707	-1.046	-0.435	0.965	0.838	1.085	-0.675	-1.019	-0.35
1582	0.931	0.777	1.028	0.936	0.812	1.046	-0.715	-1.056	-0.446	0.958	0.831	1.077	-0.694	-1.038	-0.372
1583	1.021	0.876	1.168	0.934	0.809	1.044	-0.72	-1.064	-0.451	0.951	0.824	1.069	-0.713	-1.057	-0.394
1584	0.947	0.832	1.026	0.932	0.806	1.042	-0.725	-1.072	-0.456	0.945	0.818	1.062	-0.729	-1.073	-0.413
1585	0.895	0.777	1.008	0.93	0.803	1.041	-0.731	-1.08	-0.459	0.939	0.812	1.056	-0.745	-1.089	-0.429
1586	1.005	0.89	1.113	0.927	0.8	1.039	-0.739	-1.088	-0.464	0.933	0.806	1.05	-0.762	-1.105	-0.445
1587	0.957	0.798	1.068	0.924	0.796	1.037	-0.746	-1.098	-0.469	0.927	0.8	1.044	-0.778	-1.122	-0.461
1588	0.943	0.818	1.066	0.92	0.791	1.034	-0.757	-1.111	-0.477	0.922	0.795	1.039	-0.791	-1.135	-0.475
1589	0.866	0.736	1.023	0.916	0.787	1.031	-0.767	-1.122	-0.485	0.916	0.79	1.033	-0.808	-1.148	-0.491
1590	0.897	0.755	1.004	0.912	0.784	1.028	-0.778	-1.129	-0.493	0.911	0.785	1.029	-0.821	-1.162	-0.502
1591	0.835	0.697	0.952	0.909	0.782	1.025	-0.785	-1.135	-0.501	0.906	0.78	1.024	-0.835	-1.176	-0.516
1592	0.9	0.804	0.984	0.908	0.781	1.025	-0.788	-1.137	-0.501	0.902	0.775	1.02	-0.845	-1.189	-0.526
1593	0.873	0.739	1.006	0.907	0.78	1.025	-0.791	-1.14	-0.501	0.897	0.77	1.016	-0.859	-1.203	-0.537
1594	0.981	0.868	1.084	0.906	0.779	1.025	-0.793	-1.142	-0.501	0.892	0.765	1.012	-0.873	-1.216	-0.548
1595	0.907	0.823	1.043	0.905	0.777	1.024	-0.796	-1.148	-0.503	0.888	0.761	1.008	-0.883	-1.227	-0.559
1596	0.867	0.699	0.979	0.902	0.774	1.023	-0.804	-1.156	-0.506	0.883	0.756	1.004	-0.897	-1.24	-0.57
1597	0.905	0.808	1.022	0.898	0.769	1.02	-0.814	-1.168	-0.514	0.878	0.751	0.999	-0.91	-1.254	-0.583
1598	0.948	0.765	1.091	0.892	0.763	1.016	-0.83	-1.184	-0.524	0.873	0.746	0.995	-0.924	-1.268	-0.594
1599	0.989	0.859	1.097	0.884	0.755	1.01	-0.851	-1.205	-0.54	0.868	0.74	0.99	-0.938	-1.284	-0.608
1600	0.939	0.818	1.051	0.875	0.746	1.001	-0.874	-1.229	-0.563	0.862	0.735	0.986	-0.954	-1.297	-0.618
1601	0.745	0.612	0.851	0.864	0.736	0.991	-0.903	-1.255	-0.589	0.857	0.73	0.981	-0.967	-1.311	-0.632
1602	0.745	0.62	0.916	0.853	0.727	0.982	-0.932	-1.278	-0.613	0.852	0.725	0.976	-0.981	-1.324	-0.645
1603	0.857	0.706	1.039	0.844	0.718	0.973	-0.955	-1.302	-0.636	0.847	0.72	0.971	-0.994	-1.338	-0.659
1604	0.922	0.809	1.048	0.835	0.711	0.964	-0.979	-1.32	-0.66	0.842	0.715	0.967	-1.008	-1.351	-0.67
1605	0.82	0.728	0.897	0.827	0.704	0.956	-0.999	-1.338	-0.681	0.837	0.711	0.962	-1.021	-1.362	-0.683
1606	0.798	0.678	0.882	0.82	0.696	0.948	-1.018	-1.359	-0.701	0.833	0.707	0.958	-1.032	-1.373	-0.694
1607	0.828	0.69	0.988	0.814	0.69	0.942	-1.033	-1.375	-0.717	0.829	0.703	0.954	-1.043	-1.384	-0.705
1608	0.782	0.668	0.954	0.81	0.685	0.937	-1.044	-1.388	-0.73	0.826	0.7	0.95	-1.051	-1.392	-0.716
1609	0.766	0.629	0.886	0.807	0.681	0.934	-1.052	-1.398	-0.738	0.823	0.697	0.947	-1.059	-1.4	-0.724
1610	0.772	0.681	0.886	0.806	0.678	0.932	-1.054	-1.406	-0.743	0.821	0.695	0.944	-1.065	-1.406	-0.732
1611	0.84	0.744	0.942	0.806	0.677	0.932	-1.054	-1.409	-0.743	0.819	0.694	0.942	-1.07	-1.408	-0.737
1612	0.809	0.67	0.914	0.808	0.676	0.933	-1.049	-1.411	-0.741	0.817	0.692	0.94	-1.076	-1.414	-0.743
1613	0.784	0.582	0.933	0.809	0.677	0.934	-1.046	-1.409	-0.738	0.816	0.692	0.938	-1.078	-1.414	-0.748
1614	0.84	0.717	0.989	0.811	0.679	0.935	-1.041	-1.403	-0.735	0.816	0.691	0.936	-1.078	-1.416	-0.753
1615	0.815	0.665	0.926	0.813	0.681	0.936	-1.036	-1.398	-0.733	0.815	0.692	0.935	-1.081	-1.414	-0.756
1616	0.887	0.748	0.991	0.814	0.684	0.936	-1.033	-1.39	-0.733	0.815	0.692	0.934	-1.081	-1.414	-0.759
1617	0.872	0.743	1.004	0.814	0.687	0.935	-1.033	-1.383	-0.735	0.815	0.693	0.933	-1.081	-1.411	-0.762
1618	0.744	0.601	0.871	0.814	0.689	0.933	-1.033	-1.377	-0.741	0.816	0.694	0.933	-1.078	-1.408	-0.762
1619	0.794	0.702	0.909	0.814	0.693	0.931	-1.033	-1.367	-0.746	0.816	0.696	0.932	-1.078	-1.403	-0.764
1620	0.8	0.689	0.908	0.814	0.697	0.93	-1.033	-1.356	-0.748	0.817	0.697	0.932	-1.076	-1.4	-0.764
1621	0.845	0.731	0.96	0.816	0.701	0.929	-1.028	-1.346	-0.751	0.818	0.699	0.932	-1.073	-1.395	-0.764
1622	0.735	0.616	0.882	0.818	0.706	0.93	-1.023	-1.333	-0.748	0.819	0.7	0.932	-1.07	-1.392	-0.764
1623	0.82	0.733	0.929	0.822	0.712	0.93	-1.013	-1.317	-0.748	0.821	0.702	0.933	-1.065	-1.387	-0.762
1624	0.806	0.683	0.917	0.826	0.717	0.932	-1.002	-1.304	-0.743	0.822	0.704	0.933	-1.062	-1.381	-0.762
1625	0.89	0.807	0.971	0.83	0.721	0.934	-0.992	-1.294	-0.738	0.823	0.705	0.934	-1.059	-1.378	-0.759
1626	0.863	0.755	0.953	0.834	0.724	0.936	-0.981	-1.286	-0.733	0.825	0.706	0.935	-1.054	-1.376	-0.756
1627	0.862	0.733	0.942	0.837	0.725	0.939	-0.973	-1.283	-0.725	0.826	0.707	0.937	-1.051	-1.373	-0.751
1628	0.795	0.729	0.89	0.839	0.725	0.941	-0.968	-1.283	-0.72	0.827	0.707	0.938	-1.048	-1.373	-0.748
1629	0.887	0.741	0.996	0.84	0.725	0.944	-0.966	-1.283	-0.712	0.828	0.708	0.939	-1.046	-1.37	-0.745
1630	0.848	0.72	0.96	0.841	0.723	0.946	-0.963	-1.288	-0.707	0.829	0.707	0.941	-1.043	-1.373	-0.74
1631	0.8	0.657	0.908	0.843	0.722	0.949	-0.958	-1.291	-0.699	0.83	0.707	0.942	-1.04	-1.373	-0.737
1632	0.828	0.714	0.957	0.844	0.721	0.953	-0.955	-1.294	-0.688	0.831	0.707	0.944	-1.038	-1.373	-0.732
1633	0.813	0.689	0.927	0.846	0.721	0.956	-0.95	-1.294	-0.681	0.832	0.706	0.946	-1.035	-1.376	-0.726
1634	0.828	0.701	0.933	0.848	0.72	0.961	-0.945	-1.296	-0.668	0.833	0.706	0.948	-1.032	-1.376	-0.721
1635	0.838	0.706	0.946	0.849	0.72	0.965	-0.942	-1.296	-0.657	0.833	0.705	0.95	-1.032	-1.378	-0.716
1636	0.854	0.74	0.972	0.85	0.718	0.969	-0.939	-1.302	-0.647	0.834	0.704	0.952	-1.03	-1.381	-0.71
1637	0.921	0.77	1.035	0.85	0.715	0.971	-0.939	-1.309	-0.641	0.835	0.703	0.953	-1.027	-1.384	-0.708
1638	0.863	0.77	0.975	0.847	0.71	0.971	-0.947	-1.322	-0.641	0.835	0.703	0.955	-1.027	-1.384	-0.702
1639	0.884	0.733	0.991	0.842	0.702	0.97	-0.96	-1.343	-0.644	0.836	0.702	0.958	-1.024	-1.387	-0.694
1640	0.995	0.842	1.141	0.835	0.693	0.966	-0.979	-1.367	-0.655	0.837	0.701	0.96	-1.021	-1.389	-0.689
1641	0.797	0.64	0.963	0.826	0.683	0.96	-1.002	-1.393	-0.67	0.838	0.701	0.962	-1.019	-1.389	-0.683
1642	0.723	0.554	0.858	0.819	0.674	0.954	-1.02	-1.416	-0.686	0.839	0.702	0.965	-1.016	-1.387	-0.675
1643	0.774	0.642	0.908	0.813	0.668	0.949	-1.036	-1.432	-0.699	0.842	0.703	0.968	-1.008	-1.384	-0.667
1644	0.692	0.578	0.84	0.811	0.665	0.947	-1.041	-1.44	-0.704	0.845	0.705	0.972	-1	-1.378	-0.656
1645	0.813	0.645	0.933	0.812	0.667	0.948	-1.039	-1.435	-0.701	0.848	0.708	0.976	-0.992	-1.37	-0.645
1646	0.836	0.683	0.999	0.817	0.673	0.951	-1.026	-1.419	-0.694	0.853	0.712	0.982	-0.978	-1.36	-0.629
1647	0.766	0.568	0.937	0.824	0.682	0.956	-1.007	-1.395	-0.681	0.858	0.716	0.988	-0.965	-1.349	-0.613
1648	0.877	0.722	1.01	0.834	0.693	0.962	-0.981	-1.367	-0.665	0.864	0.722	0.995	-0.948	-1.332	-0.594
1649	0.853	0.77	0.951	0.844	0.706	0.97	-0.955	-1.333	-0.644	0.87	0.728	1.002	-0.932	-1.316	-0.575
1650	0.904	0.803	1.018	0.856	0.718	0.978	-0.924	-1.302	-0.623	0.877	0.735	1.01	-0.913	-1.297	-0.553
1651	0.928	0.808	1.024	0.867	0.729	0.989	-0.895	-1.273	-0.595	0.885	0.741	1.019	-0.891	-1.281	-0.529
1652	0.877	0.763	0.963	0.879	0.74	1	-0.864	-1.244	-0.566	0.892	0.749	1.028	-0.873	-1.26	-0.505
1653	0.835	0.689	0.94	0.891	0.751	1.014	-0.832	-1.215	-0.529	0.9	0.756	1.037	-0.851	-1.24	-0.48
1654	0.832	0.645	0.951	0.904	0.762	1.03	-0.799	-1.187	-0.488	0.908	0.763	1.047	-0.829	-1.222	-0.453
1655	0.914	0.736	1.103	0.919	0.775	1.048	-0.759	-1.153	-0.441	0.916	0.771	1.057	-0.808	-1.2	-0.426
1656	0.972	0.841	1.11	0.934	0.789	1.066	-0.72	-1.116	-0.394	0.924	0.778	1.066	-0.786	-1.181	-0.402
1657	0.917	0.75	1.068	0.948	0.803	1.085	-0.684	-1.08	-0.344	0.932	0.785	1.076	-0.764	-1.162	-0.375
1658	0.975	0.878	1.08	0.962	0.816	1.103	-0.647	-1.046	-0.297	0.939	0.791	1.085	-0.745	-1.146	-0.35
1659	0.973	0.809	1.108	0.974	0.828	1.121	-0.616	-1.015	-0.25	0.945	0.797	1.094	-0.729	-1.13	-0.326
1660	1.03	0.902	1.177	0.985	0.837	1.137	-0.587	-0.991	-0.208	0.951	0.803	1.102	-0.713	-1.113	-0.304
1661	1.036	0.885	1.174	0.993	0.844	1.151	-0.566	-0.973	-0.172	0.956	0.807	1.109	-0.699	-1.102	-0.285
1662	0.995	0.835	1.115	0.999	0.848	1.163	-0.551	-0.962	-0.14	0.96	0.811	1.115	-0.689	-1.092	-0.269
1663	0.924	0.787	1.1	1.002	0.85	1.172	-0.543	-0.957	-0.117	0.963	0.813	1.12	-0.68	-1.086	-0.256
1664	1.079	0.921	1.296	1.003	0.85	1.178	-0.54	-0.957	-0.101	0.966	0.815	1.123	-0.672	-1.081	-0.248
1665	1.025	0.872	1.239	1.002	0.847	1.18	-0.543	-0.965	-0.096	0.967	0.817	1.126	-0.67	-1.076	-0.24
1666	1.027	0.868	1.231	0.998	0.843	1.176	-0.553	-0.975	-0.107	0.968	0.817	1.127	-0.667	-1.076	-0.237
1667	0.934	0.762	1.201	0.992	0.837	1.169	-0.569	-0.991	-0.125	0.967	0.817	1.127	-0.67	-1.076	-0.237
1668	1.005	0.824	1.175	0.986	0.831	1.158	-0.585	-1.007	-0.154	0.967	0.816	1.126	-0.67	-1.078	-0.24
1669	0.98	0.804	1.128	0.978	0.825	1.144	-0.605	-1.022	-0.19	0.965	0.815	1.125	-0.675	-1.081	-0.242
1670	0.9	0.781	0.995	0.969	0.818	1.13	-0.629	-1.041	-0.227	0.964	0.813	1.122	-0.678	-1.086	-0.25
1671	0.972	0.839	1.128	0.96	0.81	1.116	-0.652	-1.061	-0.263	0.962	0.811	1.12	-0.683	-1.092	-0.256
1672	1.031	0.873	1.158	0.95	0.802	1.102	-0.679	-1.082	-0.3	0.96	0.81	1.117	-0.689	-1.094	-0.264
1673	1.003	0.865	1.141	0.94	0.793	1.089	-0.705	-1.106	-0.334	0.958	0.808	1.114	-0.694	-1.1	-0.272
1674	0.915	0.763	1.058	0.929	0.784	1.077	-0.733	-1.129	-0.365	0.956	0.806	1.111	-0.699	-1.105	-0.28
1675	0.889	0.747	0.968	0.92	0.775	1.067	-0.757	-1.153	-0.391	0.954	0.804	1.109	-0.705	-1.111	-0.285
1676	0.875	0.767	1.107	0.912	0.767	1.06	-0.778	-1.174	-0.409	0.953	0.803	1.107	-0.708	-1.113	-0.291
1677	0.85	0.707	0.983	0.908	0.762	1.055	-0.788	-1.187	-0.422	0.952	0.803	1.105	-0.71	-1.113	-0.296
1678	0.918	0.747	1.081	0.906	0.759	1.054	-0.793	-1.195	-0.425	0.952	0.803	1.104	-0.71	-1.113	-0.299
1679	0.892	0.738	1.02	0.908	0.76	1.056	-0.788	-1.192	-0.42	0.952	0.803	1.104	-0.71	-1.113	-0.299
1680	0.916	0.788	1.076	0.913	0.764	1.061	-0.775	-1.182	-0.407	0.954	0.805	1.104	-0.705	-1.108	-0.299
1681	0.822	0.676	1.017	0.921	0.77	1.068	-0.754	-1.166	-0.388	0.955	0.806	1.105	-0.702	-1.105	-0.296
1682	0.921	0.765	1.044	0.931	0.78	1.078	-0.728	-1.14	-0.362	0.957	0.809	1.106	-0.697	-1.097	-0.294
1683	1.043	0.88	1.197	0.943	0.791	1.09	-0.697	-1.111	-0.331	0.96	0.812	1.108	-0.689	-1.089	-0.288
1684	0.952	0.763	1.071	0.956	0.804	1.102	-0.663	-1.077	-0.3	0.963	0.815	1.11	-0.68	-1.081	-0.283
1685	0.935	0.824	1.066	0.969	0.817	1.114	-0.629	-1.043	-0.268	0.965	0.818	1.112	-0.675	-1.073	-0.277
1686	0.982	0.78	1.155	0.981	0.831	1.127	-0.598	-1.007	-0.234	0.968	0.821	1.114	-0.667	-1.065	-0.272
1687	0.999	0.857	1.112	0.994	0.845	1.139	-0.564	-0.97	-0.203	0.97	0.824	1.115	-0.662	-1.057	-0.269
1688	0.997	0.875	1.179	1.005	0.858	1.15	-0.535	-0.936	-0.174	0.972	0.826	1.117	-0.656	-1.051	-0.264
1689	1.029	0.858	1.146	1.014	0.87	1.159	-0.512	-0.905	-0.151	0.973	0.828	1.117	-0.653	-1.046	-0.264
1690	0.988	0.873	1.162	1.021	0.878	1.165	-0.493	-0.884	-0.135	0.974	0.83	1.117	-0.651	-1.04	-0.264
1691	1.051	0.932	1.168	1.025	0.884	1.169	-0.483	-0.868	-0.125	0.974	0.83	1.117	-0.651	-1.04	-0.264
1692	1.023	0.913	1.156	1.025	0.885	1.169	-0.483	-0.866	-0.125	0.973	0.83	1.115	-0.653	-1.04	-0.269
1693	1.106	0.926	1.252	1.021	0.882	1.164	-0.493	-0.874	-0.138	0.972	0.829	1.113	-0.656	-1.043	-0.275
1694	1.087	0.939	1.272	1.013	0.874	1.155	-0.514	-0.895	-0.161	0.969	0.828	1.109	-0.664	-1.046	-0.285
1695	1.066	0.931	1.213	1	0.862	1.141	-0.548	-0.926	-0.198	0.966	0.825	1.106	-0.672	-1.054	-0.294
1696	0.963	0.802	1.102	0.984	0.846	1.123	-0.59	-0.968	-0.245	0.962	0.822	1.101	-0.683	-1.062	-0.307
1697	1.01	0.889	1.163	0.966	0.829	1.103	-0.637	-1.012	-0.297	0.958	0.819	1.096	-0.694	-1.07	-0.321
1698	0.953	0.8	1.066	0.948	0.811	1.083	-0.684	-1.059	-0.349	0.954	0.816	1.091	-0.705	-1.078	-0.334
1699	0.794	0.674	0.913	0.931	0.794	1.065	-0.728	-1.103	-0.396	0.95	0.812	1.086	-0.716	-1.089	-0.348
1700	0.858	0.783	0.959	0.918	0.78	1.051	-0.762	-1.14	-0.433	0.947	0.81	1.082	-0.724	-1.094	-0.359
1701	0.842	0.698	0.954	0.909	0.77	1.041	-0.785	-1.166	-0.459	0.943	0.807	1.078	-0.735	-1.102	-0.369
1702	0.926	0.789	1.043	0.903	0.763	1.036	-0.801	-1.184	-0.472	0.941	0.806	1.075	-0.74	-1.105	-0.377
1703	0.889	0.737	1.073	0.901	0.76	1.035	-0.806	-1.192	-0.475	0.939	0.805	1.073	-0.745	-1.108	-0.383
1704	0.924	0.77	1.088	0.902	0.76	1.036	-0.804	-1.192	-0.472	0.938	0.805	1.071	-0.748	-1.108	-0.388
1705	0.841	0.629	0.96	0.905	0.764	1.039	-0.796	-1.182	-0.464	0.938	0.806	1.07	-0.748	-1.105	-0.391
1706	0.872	0.755	1.003	0.911	0.772	1.044	-0.78	-1.161	-0.451	0.938	0.808	1.07	-0.748	-1.1	-0.391
1707	1.02	0.842	1.148	0.917	0.782	1.049	-0.765	-1.135	-0.438	0.939	0.811	1.071	-0.745	-1.092	-0.388
1708	0.985	0.85	1.175	0.923	0.792	1.054	-0.749	-1.109	-0.425	0.941	0.814	1.072	-0.74	-1.084	-0.386
1709	0.96	0.872	1.049	0.929	0.803	1.059	-0.733	-1.08	-0.412	0.943	0.818	1.073	-0.735	-1.073	-0.383
1710	0.882	0.759	0.993	0.934	0.813	1.063	-0.72	-1.054	-0.401	0.945	0.822	1.075	-0.729	-1.062	-0.377
1711	0.898	0.799	1.016	0.94	0.823	1.068	-0.705	-1.028	-0.388	0.948	0.827	1.077	-0.721	-1.048	-0.372
1712	0.944	0.843	1.065	0.946	0.832	1.074	-0.689	-1.004	-0.373	0.952	0.831	1.08	-0.71	-1.038	-0.364
1713	1.002	0.915	1.082	0.952	0.84	1.08	-0.673	-0.983	-0.357	0.955	0.837	1.083	-0.702	-1.021	-0.356
1714	0.922	0.816	1.101	0.957	0.848	1.086	-0.66	-0.962	-0.341	0.959	0.842	1.086	-0.691	-1.008	-0.348
1715	1.002	0.886	1.187	0.963	0.854	1.091	-0.645	-0.947	-0.328	0.963	0.847	1.09	-0.68	-0.994	-0.337
1716	0.974	0.854	1.067	0.968	0.859	1.095	-0.632	-0.934	-0.318	0.967	0.852	1.093	-0.67	-0.981	-0.329
1717	0.992	0.891	1.11	0.972	0.863	1.099	-0.621	-0.923	-0.308	0.971	0.857	1.097	-0.659	-0.967	-0.318
1718	0.969	0.819	1.081	0.977	0.868	1.102	-0.608	-0.91	-0.3	0.975	0.862	1.1	-0.648	-0.954	-0.31
1719	0.971	0.882	1.166	0.982	0.873	1.105	-0.595	-0.897	-0.292	0.979	0.866	1.103	-0.637	-0.943	-0.302
1720	0.951	0.837	1.075	0.987	0.878	1.109	-0.582	-0.884	-0.281	0.983	0.871	1.106	-0.626	-0.929	-0.294
1721	0.949	0.868	1.032	0.994	0.884	1.113	-0.564	-0.868	-0.271	0.986	0.875	1.108	-0.618	-0.919	-0.288
1722	1.027	0.92	1.109	1.001	0.891	1.119	-0.545	-0.85	-0.255	0.99	0.879	1.111	-0.608	-0.908	-0.28
1723	0.91	0.791	1.024	1.009	0.898	1.126	-0.525	-0.832	-0.237	0.992	0.882	1.113	-0.602	-0.9	-0.275
1724	1.061	0.927	1.165	1.016	0.904	1.133	-0.506	-0.816	-0.219	0.995	0.884	1.114	-0.594	-0.894	-0.272
1725	1.093	0.969	1.245	1.022	0.91	1.14	-0.491	-0.801	-0.2	0.997	0.887	1.116	-0.589	-0.886	-0.267
1726	0.99	0.889	1.078	1.027	0.914	1.145	-0.478	-0.79	-0.188	0.998	0.888	1.116	-0.586	-0.883	-0.267
1727	1.129	1.046	1.257	1.029	0.916	1.148	-0.472	-0.785	-0.18	0.998	0.889	1.116	-0.586	-0.881	-0.267
1728	0.994	0.859	1.116	1.028	0.915	1.148	-0.475	-0.788	-0.18	0.998	0.889	1.114	-0.586	-0.881	-0.272
1729	1.053	0.929	1.162	1.025	0.912	1.146	-0.483	-0.795	-0.185	0.997	0.888	1.113	-0.589	-0.883	-0.275
1730	1.041	0.93	1.16	1.02	0.908	1.142	-0.496	-0.806	-0.195	0.995	0.887	1.11	-0.594	-0.886	-0.283
1731	0.985	0.887	1.136	1.013	0.901	1.135	-0.514	-0.824	-0.214	0.993	0.885	1.107	-0.599	-0.891	-0.291
1732	1.023	0.916	1.169	1.005	0.894	1.127	-0.535	-0.842	-0.234	0.99	0.883	1.103	-0.608	-0.897	-0.302
1733	0.947	0.848	1.031	0.996	0.886	1.117	-0.558	-0.863	-0.261	0.987	0.881	1.099	-0.616	-0.902	-0.313
1734	1.034	0.901	1.184	0.988	0.878	1.106	-0.579	-0.884	-0.289	0.984	0.878	1.095	-0.624	-0.91	-0.323
1735	0.953	0.822	1.079	0.979	0.871	1.094	-0.603	-0.902	-0.32	0.981	0.876	1.09	-0.632	-0.916	-0.337
1736	0.945	0.833	1.102	0.97	0.864	1.082	-0.626	-0.921	-0.352	0.978	0.873	1.086	-0.64	-0.924	-0.348
1737	0.965	0.878	1.044	0.963	0.857	1.07	-0.645	-0.939	-0.383	0.975	0.87	1.081	-0.648	-0.932	-0.361
1738	0.997	0.931	1.055	0.955	0.851	1.059	-0.665	-0.955	-0.412	0.972	0.868	1.077	-0.656	-0.938	-0.372
1739	0.964	0.863	1.068	0.949	0.846	1.049	-0.681	-0.968	-0.438	0.969	0.866	1.073	-0.664	-0.943	-0.383
1740	0.905	0.802	0.989	0.944	0.841	1.042	-0.694	-0.981	-0.456	0.967	0.864	1.07	-0.67	-0.948	-0.391
1741	0.907	0.79	1.024	0.941	0.838	1.036	-0.702	-0.988	-0.472	0.965	0.863	1.068	-0.675	-0.951	-0.396
1742	0.919	0.802	1.005	0.939	0.837	1.034	-0.707	-0.991	-0.477	0.964	0.862	1.066	-0.678	-0.954	-0.402
1743	0.937	0.831	1.012	0.939	0.839	1.033	-0.707	-0.986	-0.48	0.964	0.862	1.066	-0.678	-0.954	-0.402
1744	0.946	0.825	1.034	0.941	0.842	1.036	-0.702	-0.978	-0.472	0.964	0.862	1.066	-0.678	-0.954	-0.402
1745	0.94	0.851	1.047	0.944	0.846	1.04	-0.694	-0.968	-0.461	0.964	0.863	1.067	-0.678	-0.951	-0.399
1746	0.94	0.846	1.023	0.948	0.851	1.045	-0.684	-0.955	-0.448	0.965	0.864	1.069	-0.675	-0.948	-0.394
1747	1.01	0.928	1.115	0.952	0.857	1.051	-0.673	-0.939	-0.433	0.967	0.865	1.071	-0.67	-0.946	-0.388
1748	0.977	0.9	1.095	0.957	0.862	1.057	-0.66	-0.926	-0.417	0.969	0.867	1.074	-0.664	-0.94	-0.38
1749	0.923	0.797	1.037	0.962	0.867	1.064	-0.647	-0.913	-0.399	0.972	0.869	1.078	-0.656	-0.935	-0.369
1750	0.96	0.88	1.063	0.967	0.872	1.071	-0.634	-0.9	-0.38	0.975	0.871	1.083	-0.648	-0.929	-0.356
1751	0.97	0.885	1.08	0.973	0.876	1.078	-0.618	-0.889	-0.362	0.978	0.874	1.088	-0.64	-0.921	-0.342
1752	0.993	0.887	1.087	0.98	0.881	1.087	-0.6	-0.876	-0.339	0.981	0.876	1.093	-0.632	-0.916	-0.329
1753	0.959	0.858	1.081	0.986	0.885	1.095	-0.585	-0.866	-0.318	0.985	0.879	1.099	-0.621	-0.908	-0.313
1754	1.01	0.945	1.077	0.993	0.889	1.105	-0.566	-0.855	-0.292	0.989	0.881	1.105	-0.61	-0.902	-0.296
1755	0.949	0.839	1.12	1	0.893	1.115	-0.548	-0.845	-0.266	0.993	0.884	1.111	-0.599	-0.894	-0.28
1756	1.01	0.881	1.119	1.007	0.896	1.125	-0.53	-0.837	-0.24	0.997	0.886	1.118	-0.589	-0.889	-0.261
1757	1.092	0.975	1.18	1.014	0.899	1.135	-0.512	-0.829	-0.214	1	0.889	1.124	-0.58	-0.881	-0.245
1758	1.02	0.886	1.131	1.019	0.901	1.144	-0.498	-0.824	-0.19	1.004	0.891	1.13	-0.57	-0.875	-0.229
1759	1	0.891	1.101	1.023	0.903	1.153	-0.488	-0.819	-0.167	1.007	0.893	1.136	-0.562	-0.87	-0.213
1760	0.997	0.873	1.143	1.026	0.904	1.161	-0.48	-0.816	-0.146	1.01	0.895	1.142	-0.553	-0.864	-0.196
1761	1.057	0.929	1.215	1.028	0.905	1.168	-0.475	-0.814	-0.127	1.013	0.897	1.147	-0.545	-0.859	-0.183
1762	1.057	0.884	1.229	1.029	0.905	1.173	-0.472	-0.814	-0.114	1.016	0.898	1.152	-0.537	-0.856	-0.169
1763	1.08	0.962	1.264	1.029	0.905	1.176	-0.472	-0.814	-0.107	1.018	0.9	1.157	-0.532	-0.851	-0.156
1764	0.95	0.856	1.065	1.028	0.904	1.177	-0.475	-0.816	-0.104	1.02	0.901	1.161	-0.526	-0.848	-0.145
1765	1.018	0.907	1.176	1.026	0.903	1.177	-0.48	-0.819	-0.104	1.021	0.902	1.164	-0.524	-0.845	-0.137
1766	1.077	0.922	1.221	1.024	0.902	1.177	-0.486	-0.822	-0.104	1.023	0.904	1.168	-0.518	-0.84	-0.126
1767	1.072	0.964	1.23	1.022	0.9	1.175	-0.491	-0.827	-0.109	1.024	0.905	1.17	-0.516	-0.837	-0.12
1768	0.984	0.904	1.113	1.02	0.898	1.174	-0.496	-0.832	-0.112	1.025	0.905	1.172	-0.513	-0.837	-0.115
1769	1.006	0.882	1.158	1.019	0.897	1.173	-0.498	-0.835	-0.114	1.026	0.906	1.174	-0.51	-0.835	-0.11
1770	0.933	0.791	1.109	1.019	0.897	1.173	-0.498	-0.835	-0.114	1.027	0.907	1.176	-0.507	-0.832	-0.104
1771	0.994	0.879	1.165	1.02	0.898	1.174	-0.496	-0.832	-0.112	1.028	0.908	1.178	-0.505	-0.829	-0.099
1772	1.036	0.935	1.174	1.023	0.901	1.176	-0.488	-0.824	-0.107	1.029	0.909	1.179	-0.502	-0.827	-0.096
1773	1.013	0.871	1.196	1.027	0.905	1.179	-0.478	-0.814	-0.099	1.03	0.91	1.18	-0.499	-0.824	-0.093
1774	1.047	0.912	1.199	1.031	0.909	1.181	-0.467	-0.803	-0.094	1.031	0.911	1.181	-0.496	-0.821	-0.091
1775	1.104	0.941	1.236	1.034	0.914	1.183	-0.459	-0.79	-0.088	1.032	0.912	1.181	-0.494	-0.818	-0.091
1776	0.992	0.855	1.101	1.037	0.918	1.184	-0.451	-0.78	-0.086	1.032	0.913	1.181	-0.494	-0.816	-0.091
1777	1.073	0.966	1.251	1.038	0.922	1.186	-0.449	-0.769	-0.08	1.032	0.913	1.181	-0.494	-0.816	-0.091
1778	1.079	1.021	1.162	1.038	0.924	1.186	-0.449	-0.764	-0.08	1.033	0.914	1.181	-0.491	-0.813	-0.091
1779	1.022	0.914	1.167	1.037	0.925	1.186	-0.451	-0.762	-0.08	1.033	0.914	1.18	-0.491	-0.813	-0.093
1780	1.016	0.902	1.146	1.036	0.924	1.185	-0.454	-0.764	-0.083	1.033	0.913	1.179	-0.491	-0.816	-0.096
1781	1.067	0.949	1.281	1.034	0.922	1.184	-0.459	-0.769	-0.086	1.032	0.913	1.178	-0.494	-0.816	-0.099
1782	0.997	0.905	1.19	1.032	0.919	1.181	-0.465	-0.777	-0.094	1.032	0.912	1.177	-0.494	-0.818	-0.101
1783	0.931	0.835	1.055	1.03	0.915	1.177	-0.47	-0.788	-0.104	1.032	0.911	1.176	-0.494	-0.821	-0.104
1784	1.092	0.941	1.244	1.027	0.911	1.172	-0.478	-0.798	-0.117	1.031	0.91	1.175	-0.496	-0.824	-0.107
1785	1.061	0.958	1.211	1.025	0.906	1.166	-0.483	-0.811	-0.133	1.031	0.909	1.173	-0.496	-0.827	-0.112
1786	1.085	0.933	1.291	1.021	0.901	1.159	-0.493	-0.824	-0.151	1.03	0.908	1.171	-0.499	-0.829	-0.118
1787	1.049	0.939	1.159	1.017	0.895	1.15	-0.504	-0.84	-0.174	1.029	0.907	1.17	-0.502	-0.832	-0.12
1788	0.944	0.829	1.033	1.013	0.89	1.142	-0.514	-0.853	-0.195	1.029	0.905	1.168	-0.502	-0.837	-0.126
1789	1.008	0.891	1.091	1.01	0.885	1.137	-0.522	-0.866	-0.208	1.028	0.904	1.167	-0.505	-0.84	-0.129
1790	0.982	0.814	1.084	1.008	0.882	1.134	-0.527	-0.874	-0.216	1.027	0.902	1.166	-0.507	-0.845	-0.131
1791	1.004	0.869	1.127	1.007	0.881	1.134	-0.53	-0.876	-0.216	1.027	0.901	1.165	-0.507	-0.848	-0.134
1792	0.964	0.864	1.128	1.009	0.882	1.137	-0.525	-0.874	-0.208	1.026	0.9	1.164	-0.51	-0.851	-0.137
1793	0.971	0.846	1.075	1.012	0.884	1.142	-0.517	-0.868	-0.195	1.026	0.898	1.164	-0.51	-0.856	-0.137
1794	1.052	0.928	1.203	1.017	0.888	1.15	-0.504	-0.858	-0.174	1.025	0.897	1.163	-0.513	-0.859	-0.139
1795	1.018	0.917	1.146	1.022	0.893	1.159	-0.491	-0.845	-0.151	1.024	0.895	1.162	-0.516	-0.864	-0.142
1796	1.029	0.903	1.163	1.028	0.897	1.168	-0.475	-0.835	-0.127	1.023	0.894	1.161	-0.518	-0.867	-0.145
1797	1.02	0.885	1.136	1.034	0.902	1.178	-0.459	-0.822	-0.101	1.021	0.891	1.16	-0.524	-0.875	-0.147
1798	1.075	0.859	1.235	1.039	0.906	1.186	-0.446	-0.811	-0.08	1.018	0.889	1.157	-0.532	-0.881	-0.156
1799	1.07	0.971	1.233	1.043	0.91	1.193	-0.436	-0.801	-0.062	1.015	0.885	1.155	-0.54	-0.891	-0.161
1800	0.945	0.811	1.12	1.045	0.912	1.196	-0.431	-0.795	-0.054	1.012	0.882	1.151	-0.548	-0.9	-0.172
1801	1.125	0.993	1.346	1.046	0.913	1.197	-0.428	-0.793	-0.052	1.007	0.877	1.146	-0.562	-0.913	-0.185
1802	1.057	0.951	1.159	1.045	0.911	1.194	-0.431	-0.798	-0.06	1.002	0.872	1.14	-0.575	-0.927	-0.202
1803	1.006	0.877	1.219	1.041	0.907	1.188	-0.441	-0.808	-0.075	0.996	0.866	1.134	-0.591	-0.943	-0.218
1804	1.074	0.94	1.187	1.034	0.9	1.178	-0.459	-0.827	-0.101	0.989	0.859	1.126	-0.61	-0.962	-0.24
1805	1.045	0.927	1.129	1.024	0.889	1.166	-0.486	-0.855	-0.133	0.982	0.852	1.118	-0.629	-0.981	-0.261
1806	1.013	0.875	1.126	1.011	0.876	1.15	-0.519	-0.889	-0.174	0.974	0.844	1.109	-0.651	-1.002	-0.285
1807	1.003	0.886	1.171	0.996	0.86	1.133	-0.558	-0.931	-0.219	0.965	0.836	1.1	-0.675	-1.024	-0.31
1808	1.04	0.855	1.161	0.978	0.842	1.113	-0.605	-0.978	-0.271	0.956	0.827	1.09	-0.699	-1.048	-0.337
1809	1.012	0.866	1.127	0.957	0.823	1.09	-0.66	-1.028	-0.331	0.946	0.819	1.08	-0.726	-1.07	-0.364
1810	0.888	0.74	1.067	0.935	0.804	1.066	-0.718	-1.077	-0.394	0.937	0.81	1.07	-0.751	-1.094	-0.391
1811	0.953	0.78	1.079	0.913	0.785	1.042	-0.775	-1.127	-0.456	0.928	0.802	1.06	-0.775	-1.116	-0.418
1812	0.811	0.713	0.967	0.892	0.768	1.019	-0.83	-1.171	-0.516	0.92	0.794	1.051	-0.797	-1.138	-0.442
1813	0.879	0.776	0.993	0.873	0.752	0.997	-0.879	-1.213	-0.574	0.912	0.787	1.043	-0.818	-1.157	-0.464
1814	0.854	0.742	0.952	0.857	0.739	0.979	-0.921	-1.247	-0.621	0.905	0.781	1.036	-0.837	-1.173	-0.483
1815	0.83	0.744	0.936	0.844	0.729	0.965	-0.955	-1.273	-0.657	0.899	0.776	1.031	-0.854	-1.186	-0.496
1816	0.761	0.666	0.889	0.835	0.721	0.955	-0.979	-1.294	-0.683	0.895	0.772	1.026	-0.864	-1.197	-0.51
1817	0.884	0.787	1.031	0.83	0.717	0.95	-0.992	-1.304	-0.696	0.892	0.769	1.024	-0.873	-1.205	-0.516
1818	0.8	0.67	0.93	0.83	0.715	0.95	-0.992	-1.309	-0.696	0.89	0.767	1.023	-0.878	-1.211	-0.518
1819	0.817	0.694	0.93	0.833	0.718	0.955	-0.984	-1.302	-0.683	0.889	0.766	1.023	-0.881	-1.214	-0.518
1820	0.815	0.67	0.909	0.842	0.725	0.965	-0.96	-1.283	-0.657	0.89	0.767	1.026	-0.878	-1.211	-0.51
1821	0.773	0.672	0.881	0.854	0.735	0.981	-0.929	-1.257	-0.615	0.892	0.768	1.029	-0.873	-1.208	-0.502
1822	0.833	0.74	0.935	0.87	0.749	1.002	-0.887	-1.221	-0.561	0.896	0.771	1.034	-0.862	-1.2	-0.488
1823	0.944	0.794	1.074	0.889	0.765	1.027	-0.838	-1.179	-0.495	0.9	0.774	1.04	-0.851	-1.192	-0.472
1824	0.872	0.754	0.988	0.908	0.782	1.053	-0.788	-1.135	-0.428	0.904	0.777	1.047	-0.84	-1.184	-0.453
1825	0.909	0.773	1.051	0.928	0.799	1.079	-0.736	-1.09	-0.36	0.909	0.781	1.054	-0.827	-1.173	-0.434
1826	1.041	0.907	1.234	0.946	0.814	1.103	-0.689	-1.051	-0.297	0.914	0.785	1.061	-0.813	-1.162	-0.415
1827	1.022	0.913	1.272	0.96	0.827	1.122	-0.652	-1.017	-0.248	0.919	0.789	1.068	-0.799	-1.151	-0.396
1828	0.988	0.835	1.194	0.971	0.836	1.134	-0.624	-0.994	-0.216	0.924	0.793	1.074	-0.786	-1.14	-0.38
1829	1.02	0.82	1.157	0.978	0.842	1.141	-0.605	-0.978	-0.198	0.929	0.796	1.08	-0.772	-1.132	-0.364
1830	0.948	0.834	1.148	0.982	0.845	1.143	-0.595	-0.97	-0.193	0.933	0.799	1.085	-0.762	-1.124	-0.35
1831	1	0.853	1.174	0.982	0.845	1.141	-0.595	-0.97	-0.198	0.937	0.801	1.089	-0.751	-1.119	-0.34
1832	1.028	0.914	1.141	0.978	0.842	1.135	-0.605	-0.978	-0.214	0.94	0.803	1.093	-0.743	-1.113	-0.329
1833	0.942	0.829	1.06	0.973	0.835	1.127	-0.618	-0.996	-0.234	0.943	0.804	1.097	-0.735	-1.111	-0.318
1834	1.03	0.874	1.145	0.965	0.827	1.118	-0.639	-1.017	-0.258	0.945	0.805	1.1	-0.729	-1.108	-0.31
1835	0.99	0.875	1.111	0.955	0.816	1.109	-0.665	-1.046	-0.281	0.947	0.806	1.103	-0.724	-1.105	-0.302
1836	0.937	0.799	1.082	0.946	0.805	1.101	-0.689	-1.075	-0.302	0.95	0.807	1.105	-0.716	-1.102	-0.296
1837	0.854	0.729	1.026	0.938	0.794	1.095	-0.71	-1.103	-0.318	0.952	0.808	1.108	-0.71	-1.1	-0.288
1838	0.841	0.651	1.014	0.932	0.786	1.092	-0.725	-1.124	-0.326	0.955	0.809	1.111	-0.702	-1.097	-0.28
1839	0.938	0.812	1.101	0.93	0.78	1.091	-0.731	-1.14	-0.328	0.957	0.811	1.114	-0.697	-1.092	-0.272
1840	0.942	0.806	1.123	0.93	0.778	1.093	-0.731	-1.145	-0.323	0.961	0.813	1.117	-0.686	-1.086	-0.264
1841	0.882	0.748	1.074	0.933	0.779	1.097	-0.723	-1.142	-0.313	0.965	0.815	1.121	-0.675	-1.081	-0.253
1842	0.983	0.761	1.151	0.939	0.783	1.101	-0.707	-1.132	-0.302	0.969	0.818	1.125	-0.664	-1.073	-0.242
1843	0.888	0.749	1.076	0.947	0.79	1.108	-0.686	-1.114	-0.284	0.973	0.822	1.129	-0.653	-1.062	-0.231
1844	0.948	0.758	1.095	0.957	0.8	1.115	-0.66	-1.088	-0.266	0.978	0.826	1.133	-0.64	-1.051	-0.221
1845	0.95	0.745	1.102	0.967	0.812	1.122	-0.634	-1.056	-0.248	0.984	0.83	1.138	-0.624	-1.04	-0.207
1846	1.065	0.921	1.21	0.979	0.825	1.13	-0.603	-1.022	-0.227	0.989	0.835	1.142	-0.61	-1.027	-0.196
1847	0.96	0.859	1.119	0.99	0.837	1.138	-0.574	-0.991	-0.206	0.994	0.84	1.147	-0.597	-1.013	-0.183
1848	1.081	0.961	1.187	1	0.847	1.146	-0.548	-0.965	-0.185	1	0.844	1.152	-0.58	-1.002	-0.169
1849	0.984	0.842	1.118	1.009	0.856	1.153	-0.525	-0.942	-0.167	1.005	0.849	1.157	-0.567	-0.989	-0.156
1850	0.994	0.89	1.154	1.017	0.862	1.16	-0.504	-0.926	-0.148	1.01	0.853	1.162	-0.553	-0.978	-0.142
1851	0.988	0.796	1.122	1.025	0.868	1.167	-0.483	-0.91	-0.13	1.015	0.858	1.167	-0.54	-0.965	-0.129
1852	1.097	0.923	1.22	1.031	0.873	1.174	-0.467	-0.897	-0.112	1.02	0.861	1.171	-0.526	-0.956	-0.118
1853	1.047	0.908	1.194	1.037	0.876	1.18	-0.451	-0.889	-0.096	1.024	0.865	1.176	-0.516	-0.946	-0.104
1854	1.062	0.846	1.216	1.041	0.88	1.186	-0.441	-0.879	-0.08	1.028	0.868	1.18	-0.505	-0.938	-0.093
1855	1.026	0.799	1.186	1.045	0.884	1.191	-0.431	-0.868	-0.067	1.031	0.871	1.183	-0.496	-0.929	-0.085
1856	1.048	0.906	1.19	1.048	0.889	1.195	-0.423	-0.855	-0.057	1.034	0.873	1.187	-0.488	-0.924	-0.075
1857	0.975	0.815	1.155	1.052	0.894	1.2	-0.412	-0.842	-0.044	1.037	0.875	1.19	-0.48	-0.919	-0.066
1858	1.043	0.919	1.203	1.055	0.899	1.205	-0.405	-0.829	-0.031	1.039	0.877	1.192	-0.475	-0.913	-0.061
1859	1.024	0.877	1.134	1.058	0.903	1.21	-0.397	-0.819	-0.018	1.04	0.877	1.195	-0.472	-0.913	-0.053
1860	1.087	0.963	1.249	1.061	0.905	1.215	-0.389	-0.814	-0.005	1.041	0.878	1.196	-0.47	-0.91	-0.05
1861	1.178	1.022	1.308	1.062	0.905	1.218	-0.386	-0.814	0.003	1.041	0.877	1.197	-0.47	-0.913	-0.047
1862	1.07	0.937	1.207	1.06	0.901	1.221	-0.391	-0.824	0.011	1.041	0.877	1.198	-0.47	-0.913	-0.045
1863	1.035	0.865	1.216	1.057	0.895	1.221	-0.399	-0.84	0.011	1.04	0.875	1.198	-0.472	-0.919	-0.045
1864	1.027	0.86	1.139	1.053	0.887	1.221	-0.41	-0.861	0.011	1.039	0.873	1.197	-0.475	-0.924	-0.047
1865	1.027	0.867	1.151	1.047	0.877	1.219	-0.426	-0.887	0.006	1.038	0.871	1.196	-0.478	-0.929	-0.05
1866	1.094	0.937	1.389	1.041	0.867	1.216	-0.441	-0.913	-0.002	1.036	0.869	1.194	-0.483	-0.935	-0.056
1867	1.038	0.778	1.304	1.034	0.857	1.209	-0.459	-0.939	-0.021	1.033	0.866	1.192	-0.491	-0.943	-0.061
1868	1.073	0.909	1.207	1.026	0.848	1.2	-0.48	-0.962	-0.044	1.031	0.864	1.19	-0.496	-0.948	-0.066
1869	0.93	0.792	1.141	1.019	0.839	1.188	-0.498	-0.986	-0.075	1.029	0.862	1.187	-0.502	-0.954	-0.075
1870	1.04	0.821	1.151	1.013	0.833	1.177	-0.514	-1.002	-0.104	1.027	0.86	1.184	-0.507	-0.959	-0.083
1871	1.033	0.91	1.242	1.007	0.828	1.165	-0.53	-1.015	-0.135	1.025	0.858	1.181	-0.513	-0.965	-0.091
1872	1.001	0.747	1.136	1.003	0.826	1.155	-0.54	-1.02	-0.161	1.023	0.857	1.179	-0.518	-0.967	-0.096
1873	0.942	0.739	1.072	1.001	0.827	1.147	-0.545	-1.017	-0.182	1.021	0.857	1.177	-0.524	-0.967	-0.101
1874	0.956	0.787	1.092	1.001	0.831	1.143	-0.545	-1.007	-0.193	1.02	0.857	1.175	-0.526	-0.967	-0.107
1875	0.95	0.812	1.077	1.004	0.839	1.142	-0.538	-0.986	-0.195	1.02	0.858	1.174	-0.526	-0.965	-0.11
1876	1.009	0.832	1.122	1.008	0.849	1.145	-0.527	-0.96	-0.188	1.019	0.859	1.174	-0.529	-0.962	-0.11
1877	1.038	0.889	1.12	1.014	0.86	1.152	-0.512	-0.931	-0.169	1.019	0.86	1.174	-0.529	-0.959	-0.11
1878	1.012	0.885	1.153	1.019	0.87	1.16	-0.498	-0.905	-0.148	1.02	0.862	1.175	-0.526	-0.954	-0.107
1879	1.039	0.916	1.179	1.025	0.879	1.169	-0.483	-0.882	-0.125	1.02	0.864	1.176	-0.526	-0.948	-0.104
1880	1.094	0.961	1.21	1.028	0.885	1.178	-0.475	-0.866	-0.101	1.021	0.865	1.177	-0.524	-0.946	-0.101
1881	1.044	0.92	1.249	1.03	0.888	1.185	-0.47	-0.858	-0.083	1.022	0.867	1.179	-0.521	-0.94	-0.096
1882	1.091	0.948	1.285	1.029	0.887	1.19	-0.472	-0.861	-0.07	1.023	0.869	1.181	-0.518	-0.935	-0.091
1883	1.083	0.916	1.212	1.027	0.884	1.192	-0.478	-0.868	-0.065	1.024	0.87	1.183	-0.516	-0.932	-0.085
1884	1.013	0.873	1.181	1.023	0.879	1.191	-0.488	-0.882	-0.067	1.026	0.871	1.185	-0.51	-0.929	-0.08
1885	0.936	0.782	1.179	1.019	0.874	1.19	-0.498	-0.895	-0.07	1.027	0.873	1.187	-0.507	-0.924	-0.075
1886	1.05	0.894	1.254	1.016	0.869	1.188	-0.506	-0.908	-0.075	1.029	0.875	1.189	-0.502	-0.919	-0.069
1887	0.986	0.872	1.163	1.015	0.866	1.185	-0.509	-0.915	-0.083	1.031	0.877	1.192	-0.496	-0.913	-0.061
1888	0.963	0.801	1.075	1.016	0.864	1.185	-0.506	-0.921	-0.083	1.034	0.879	1.195	-0.488	-0.908	-0.053
1889	0.974	0.786	1.169	1.019	0.865	1.186	-0.498	-0.918	-0.08	1.037	0.881	1.198	-0.48	-0.902	-0.045
1890	0.983	0.89	1.138	1.025	0.868	1.189	-0.483	-0.91	-0.073	1.04	0.884	1.201	-0.472	-0.894	-0.037
1891	1.092	0.896	1.227	1.033	0.873	1.195	-0.462	-0.897	-0.057	1.044	0.887	1.205	-0.461	-0.886	-0.026
1892	1.067	0.899	1.185	1.042	0.879	1.202	-0.438	-0.882	-0.039	1.048	0.891	1.209	-0.451	-0.875	-0.015
1893	0.978	0.833	1.158	1.051	0.886	1.21	-0.415	-0.863	-0.018	1.052	0.894	1.213	-0.44	-0.867	-0.004
1894	1.055	0.912	1.243	1.061	0.894	1.219	-0.389	-0.842	0.006	1.056	0.898	1.217	-0.429	-0.856	0.007
1895	1.08	0.867	1.254	1.071	0.902	1.227	-0.363	-0.822	0.026	1.06	0.902	1.221	-0.418	-0.845	0.018
1896	1.15	0.965	1.306	1.079	0.91	1.234	-0.342	-0.801	0.045	1.064	0.906	1.225	-0.407	-0.835	0.028
1897	1.183	0.987	1.323	1.085	0.917	1.239	-0.326	-0.782	0.058	1.068	0.91	1.228	-0.396	-0.824	0.036
1898	1.091	0.924	1.226	1.089	0.924	1.243	-0.316	-0.764	0.068	1.071	0.913	1.232	-0.388	-0.816	0.047
1899	1.01	0.835	1.139	1.092	0.929	1.246	-0.308	-0.751	0.076	1.074	0.917	1.235	-0.38	-0.805	0.055
1900	1.071	0.896	1.219	1.094	0.935	1.25	-0.303	-0.735	0.086	1.077	0.92	1.238	-0.372	-0.797	0.064
1901	1.155	1.009	1.337	1.095	0.94	1.253	-0.3	-0.722	0.094	1.079	0.923	1.24	-0.367	-0.789	0.069
1902	1.119	1.027	1.25	1.096	0.944	1.255	-0.298	-0.712	0.1	1.081	0.926	1.243	-0.361	-0.781	0.077
1903	1.022	0.878	1.195	1.096	0.946	1.258	-0.298	-0.707	0.107	1.083	0.928	1.245	-0.356	-0.775	0.082
1904	1.099	0.974	1.29	1.096	0.947	1.26	-0.298	-0.704	0.113	1.084	0.931	1.247	-0.353	-0.767	0.088
1905	1.037	0.915	1.229	1.097	0.947	1.262	-0.295	-0.704	0.118	1.086	0.933	1.249	-0.348	-0.762	0.093
1906	1.13	0.962	1.305	1.097	0.947	1.264	-0.295	-0.704	0.123	1.087	0.935	1.25	-0.345	-0.756	0.096
1907	1.052	0.887	1.218	1.097	0.946	1.264	-0.295	-0.707	0.123	1.088	0.936	1.251	-0.342	-0.753	0.099
1908	1.156	1.005	1.274	1.096	0.944	1.264	-0.298	-0.712	0.123	1.089	0.938	1.252	-0.34	-0.748	0.101
1909	1.194	0.986	1.331	1.094	0.941	1.262	-0.303	-0.72	0.118	1.09	0.94	1.253	-0.337	-0.743	0.104
1910	1.131	0.984	1.284	1.09	0.938	1.259	-0.313	-0.728	0.11	1.091	0.941	1.254	-0.334	-0.74	0.107
1911	1.131	0.951	1.344	1.084	0.933	1.255	-0.329	-0.741	0.1	1.092	0.943	1.255	-0.331	-0.735	0.109
1912	1.021	0.883	1.213	1.079	0.93	1.249	-0.342	-0.748	0.084	1.094	0.945	1.256	-0.326	-0.729	0.112
1913	0.952	0.821	1.18	1.076	0.928	1.245	-0.35	-0.754	0.073	1.095	0.947	1.256	-0.323	-0.724	0.112
1914	1.035	0.912	1.219	1.075	0.929	1.242	-0.352	-0.751	0.066	1.097	0.95	1.258	-0.318	-0.716	0.118
1915	1.132	0.991	1.222	1.077	0.931	1.241	-0.347	-0.746	0.063	1.1	0.953	1.259	-0.31	-0.708	0.12
1916	1.035	0.932	1.162	1.081	0.936	1.242	-0.337	-0.733	0.066	1.103	0.957	1.261	-0.302	-0.697	0.126
1917	1.055	0.887	1.285	1.087	0.942	1.246	-0.321	-0.717	0.076	1.106	0.961	1.264	-0.294	-0.686	0.134
1918	1.094	0.932	1.236	1.095	0.949	1.251	-0.3	-0.699	0.089	1.11	0.965	1.267	-0.283	-0.675	0.142
1919	1.13	0.98	1.253	1.104	0.958	1.257	-0.277	-0.675	0.105	1.114	0.97	1.271	-0.272	-0.662	0.153
1920	1.093	0.943	1.2	1.114	0.968	1.265	-0.251	-0.649	0.126	1.119	0.974	1.274	-0.259	-0.651	0.161
1921	1.122	0.939	1.393	1.123	0.978	1.272	-0.227	-0.623	0.144	1.124	0.98	1.279	-0.245	-0.635	0.174
1922	1.214	1.056	1.345	1.131	0.987	1.278	-0.206	-0.6	0.16	1.129	0.985	1.283	-0.231	-0.621	0.185
1923	1.196	1.064	1.29	1.137	0.995	1.284	-0.191	-0.579	0.175	1.134	0.99	1.288	-0.218	-0.608	0.199
1924	1.144	1.039	1.276	1.142	1.001	1.289	-0.178	-0.563	0.188	1.139	0.995	1.293	-0.204	-0.594	0.212
1925	1.118	1.006	1.223	1.147	1.006	1.295	-0.164	-0.55	0.204	1.144	1	1.298	-0.191	-0.58	0.226
1926	1.102	0.965	1.263	1.151	1.009	1.302	-0.154	-0.542	0.222	1.15	1.005	1.304	-0.175	-0.567	0.242
1927	1.199	1.061	1.359	1.155	1.013	1.309	-0.144	-0.532	0.24	1.155	1.01	1.31	-0.161	-0.553	0.258
1928	1.187	1.032	1.319	1.159	1.016	1.317	-0.133	-0.524	0.261	1.16	1.015	1.316	-0.147	-0.54	0.275
1929	1.087	0.948	1.289	1.165	1.02	1.325	-0.118	-0.514	0.282	1.166	1.019	1.322	-0.131	-0.529	0.291
1930	1.178	0.963	1.358	1.171	1.026	1.333	-0.102	-0.498	0.303	1.171	1.024	1.329	-0.118	-0.516	0.31
1931	1.126	0.982	1.274	1.178	1.033	1.341	-0.084	-0.48	0.324	1.177	1.028	1.335	-0.101	-0.505	0.326
1932	1.2	1.068	1.433	1.186	1.041	1.349	-0.063	-0.459	0.345	1.182	1.033	1.341	-0.088	-0.491	0.342
1933	1.157	1.033	1.347	1.194	1.05	1.357	-0.042	-0.435	0.366	1.188	1.037	1.348	-0.072	-0.48	0.361
1934	1.164	0.98	1.289	1.203	1.058	1.363	-0.018	-0.414	0.381	1.193	1.041	1.354	-0.058	-0.47	0.377
1935	1.271	1.142	1.439	1.21	1.065	1.369	0	-0.396	0.397	1.198	1.044	1.361	-0.045	-0.461	0.396
1936	1.255	1.12	1.41	1.216	1.069	1.373	0.015	-0.386	0.407	1.203	1.047	1.367	-0.031	-0.453	0.412
1937	1.301	1.192	1.422	1.22	1.07	1.376	0.026	-0.383	0.415	1.207	1.05	1.373	-0.02	-0.445	0.429
1938	1.323	1.195	1.426	1.22	1.066	1.377	0.026	-0.394	0.418	1.211	1.052	1.379	-0.01	-0.44	0.445
1939	1.147	1.024	1.279	1.219	1.06	1.378	0.023	-0.409	0.421	1.215	1.054	1.385	0.001	-0.434	0.461
1940	1.184	0.97	1.407	1.218	1.053	1.379	0.021	-0.428	0.423	1.218	1.055	1.391	0.009	-0.432	0.477
1941	1.162	0.998	1.372	1.216	1.045	1.381	0.015	-0.448	0.428	1.221	1.057	1.397	0.018	-0.426	0.494
1942	1.224	1.019	1.355	1.216	1.039	1.385	0.015	-0.464	0.439	1.225	1.058	1.403	0.028	-0.424	0.51
1943	1.187	0.979	1.372	1.216	1.036	1.39	0.015	-0.472	0.452	1.228	1.059	1.409	0.036	-0.421	0.526
1944	1.202	1.059	1.36	1.218	1.034	1.397	0.021	-0.477	0.47	1.231	1.061	1.416	0.045	-0.415	0.545
1945	1.253	1.043	1.407	1.22	1.034	1.406	0.026	-0.477	0.493	1.233	1.063	1.422	0.05	-0.41	0.561
1946	1.259	1.088	1.454	1.224	1.036	1.417	0.036	-0.472	0.522	1.236	1.064	1.428	0.058	-0.407	0.577
1947	1.146	0.92	1.303	1.228	1.039	1.428	0.047	-0.464	0.551	1.239	1.066	1.434	0.066	-0.402	0.594
1948	1.324	1.14	1.538	1.232	1.045	1.441	0.057	-0.448	0.585	1.241	1.068	1.439	0.072	-0.396	0.607
1949	1.112	0.883	1.334	1.238	1.053	1.453	0.073	-0.428	0.616	1.243	1.071	1.445	0.077	-0.388	0.623
1950	1.333	1.151	1.701	1.244	1.063	1.465	0.089	-0.401	0.647	1.245	1.073	1.449	0.082	-0.383	0.634
1951	1.196	1.01	1.419	1.25	1.074	1.475	0.104	-0.373	0.674	1.247	1.074	1.453	0.088	-0.38	0.645
1952	1.231	1.107	1.397	1.257	1.085	1.484	0.123	-0.344	0.697	1.248	1.076	1.457	0.09	-0.375	0.656
1953	1.299	1.151	1.456	1.263	1.095	1.492	0.138	-0.318	0.718	1.249	1.077	1.46	0.093	-0.372	0.664
1954	1.229	1.043	1.5	1.269	1.104	1.498	0.154	-0.294	0.734	1.25	1.077	1.462	0.096	-0.372	0.669
1955	1.303	1.158	1.511	1.273	1.11	1.503	0.164	-0.279	0.747	1.249	1.077	1.463	0.093	-0.372	0.672
1956	1.294	1.14	1.6	1.276	1.113	1.504	0.172	-0.271	0.749	1.249	1.076	1.463	0.093	-0.375	0.672
1957	1.292	1.167	1.53	1.276	1.113	1.501	0.172	-0.271	0.741	1.247	1.074	1.463	0.088	-0.38	0.672
1958	1.338	1.175	1.523	1.273	1.11	1.495	0.164	-0.279	0.726	1.245	1.071	1.462	0.082	-0.388	0.669
1959	1.327	1.091	1.574	1.268	1.102	1.485	0.151	-0.3	0.7	1.242	1.068	1.46	0.074	-0.396	0.664
1960	1.248	1.079	1.544	1.26	1.093	1.473	0.13	-0.323	0.668	1.239	1.064	1.457	0.066	-0.407	0.656
1961	1.198	1.088	1.328	1.251	1.081	1.46	0.107	-0.354	0.634	1.236	1.059	1.454	0.058	-0.421	0.648
1962	1.207	1.051	1.391	1.242	1.069	1.448	0.083	-0.386	0.603	1.232	1.053	1.451	0.047	-0.437	0.64
1963	1.212	1.026	1.394	1.233	1.056	1.438	0.06	-0.42	0.577	1.228	1.047	1.449	0.036	-0.453	0.634
1964	1.232	1.005	1.384	1.225	1.044	1.431	0.039	-0.451	0.559	1.224	1.041	1.446	0.026	-0.47	0.626
1965	1.199	1.027	1.36	1.216	1.032	1.426	0.015	-0.482	0.546	1.22	1.035	1.444	0.015	-0.486	0.621
1966	1.154	0.988	1.406	1.208	1.021	1.423	-0.005	-0.511	0.538	1.216	1.029	1.443	0.004	-0.502	0.618
1967	1.33	1.09	1.552	1.2	1.009	1.42	-0.026	-0.542	0.53	1.212	1.022	1.442	-0.007	-0.521	0.615
1968	1.175	0.999	1.457	1.191	0.998	1.418	-0.05	-0.571	0.525	1.209	1.016	1.441	-0.015	-0.537	0.613
1969	1.315	1.051	1.599	1.182	0.988	1.415	-0.073	-0.597	0.517	1.206	1.011	1.442	-0.023	-0.551	0.615
1970	1.178	1.01	1.433	1.174	0.977	1.412	-0.094	-0.626	0.509	1.203	1.005	1.442	-0.031	-0.567	0.615
1971	1.021	0.862	1.197	1.168	0.969	1.411	-0.11	-0.647	0.507	1.201	1	1.444	-0.037	-0.58	0.621
1972	1.082	0.938	1.262	1.165	0.962	1.415	-0.118	-0.665	0.517	1.2	0.996	1.447	-0.039	-0.591	0.629
1973	1.152	0.957	1.401	1.166	0.959	1.423	-0.115	-0.673	0.538	1.2	0.993	1.451	-0.039	-0.599	0.64
1974	1.136	0.895	1.38	1.171	0.959	1.434	-0.102	-0.673	0.567	1.201	0.99	1.456	-0.037	-0.608	0.653
1975	1.169	0.9	1.455	1.178	0.962	1.448	-0.084	-0.665	0.603	1.202	0.987	1.462	-0.034	-0.616	0.669
1976	1.209	1.035	1.639	1.187	0.966	1.462	-0.06	-0.655	0.64	1.204	0.986	1.469	-0.029	-0.618	0.688
1977	1.268	0.993	1.615	1.197	0.972	1.474	-0.034	-0.639	0.671	1.206	0.985	1.476	-0.023	-0.621	0.707
1978	1.212	0.965	1.442	1.206	0.979	1.485	-0.011	-0.621	0.7	1.209	0.984	1.484	-0.015	-0.624	0.729
1979	1.195	1.006	1.369	1.216	0.985	1.495	0.015	-0.605	0.726	1.213	0.983	1.493	-0.004	-0.626	0.753
1980	1.217	0.97	1.607	1.225	0.991	1.505	0.039	-0.589	0.752	1.216	0.983	1.502	0.004	-0.626	0.778
1981	1.216	0.987	1.421	1.233	0.996	1.515	0.06	-0.576	0.778	1.22	0.983	1.511	0.015	-0.626	0.802
1982	1.265	1.026	1.47	1.241	1	1.526	0.081	-0.566	0.807	1.224	0.983	1.521	0.026	-0.626	0.829
1983	1.264	1.032	1.661	1.246	1.002	1.536	0.094	-0.561	0.833	1.228	0.983	1.531	0.036	-0.626	0.856
1984	1.332	1.08	1.575	1.25	1.001	1.545	0.104	-0.563	0.856	1.231	0.982	1.542	0.045	-0.629	0.886
1985	1.271	1.003	1.604	1.252	0.999	1.554	0.109	-0.568	0.88	1.235	0.982	1.553	0.055	-0.629	0.916
1986	1.265	0.981	1.617	1.252	0.995	1.563	0.109	-0.579	0.903	1.239	0.981	1.564	0.066	-0.632	0.945
1987	1.167	0.975	1.492	1.252	0.99	1.574	0.109	-0.592	0.932	1.242	0.981	1.575	0.074	-0.632	0.975
1988	1.215	0.977	1.466	1.252	0.985	1.587	0.109	-0.605	0.966	1.246	0.98	1.587	0.085	-0.635	1.008
1989	1.237	0.877	1.504	1.252	0.98	1.603	0.109	-0.618	1.008	1.249	0.979	1.599	0.093	-0.637	1.04
1990	1.317	1.063	1.658	1.252	0.976	1.623	0.109	-0.628	1.06	1.253	0.978	1.611	0.104	-0.64	1.073
1991	1.215	0.923	1.64	1.252	0.972	1.645	0.109	-0.639	1.117	1.256	0.978	1.624	0.112	-0.64	1.108
1992	1.263	0.993	1.771	1.253	0.968	1.667	0.112	-0.649	1.174	1.259	0.977	1.636	0.12	-0.643	1.14

## Sheet: D_Ljungq2010_low100_boot
targ_age_b2k	ts_50	sefit	fitcu95	fitcl95	np	ts_50_boot	yfit_boot_median	yfit_boot_se	yfit_boot_cu95	yfit_boot_cl95	xspan	YearCE
5	-0.082492	0.023176	-0.036139	-0.128844	10	-0.075735	-0.071767	0.0013	-0.01499	-0.179504	90	1945
10	-0.072736	0.020916	-0.030904	-0.114567	10	-0.068422	-0.047098	0.001155	-0.03302	-0.121206	90	1940
15	-0.062754	0.018931	-0.024892	-0.100615	10	-0.060496	-0.095875	0.00103	-0.020282	-0.103108	90	1935
20	-0.052635	0.017321	-0.017994	-0.087276	10	-0.051869	-0.029704	0.000923	-0.021147	-0.092816	90	1930
25	-0.042548	0.016197	-0.010155	-0.074942	10	-0.042493	-0.043705	0.000825	-0.001618	-0.090349	90	1925
30	-0.032716	0.015639	-0.001439	-0.063993	10	-0.032921	-0.034438	0.000753	0.006687	-0.071666	90	1920
35	-0.023328	0.015639	0.00795	-0.054605	10	-0.023564	-0.025401	0.000712	0.019338	-0.059	90	1915
40	-0.01455	0.016055	0.017559	-0.046659	10	-0.015706	-0.01677	0.000721	0.027234	-0.054598	90	1910
45	-0.006281	0.01659	0.026899	-0.039461	10	-0.007687	-0.008932	0.00075	0.038857	-0.050086	90	1905
50	0.000349	0.017263	0.034875	-0.034176	10	-0.000808	-0.001601	0.000789	0.052393	-0.04639	90	1900
55	0.007681	0.017283	0.042248	-0.026885	11	0.006617	0.006189	0.000834	0.064585	-0.043456	100	1895
60	0.014385	0.018826	0.052038	-0.023267	10	0.010866	0.010655	0.000838	0.065919	-0.040334	90	1890
65	0.018984	0.01704	0.053064	-0.015095	11	0.015244	0.015674	0.000797	0.063686	-0.03676	100	1885
70	0.021441	0.016353	0.054147	-0.011264	10	0.0162	0.017404	0.000743	0.058624	-0.03288	90	1880
75	0.0204	0.013771	0.047942	-0.007142	11	0.016408	0.018098	0.000664	0.053401	-0.028012	100	1875
80	0.016271	0.012917	0.042105	-0.009562	10	0.01369	0.014474	0.00058	0.0464	-0.025181	90	1870
85	0.009908	0.01104	0.031988	-0.012171	11	0.00922	0.010093	0.000521	0.038724	-0.023856	100	1865
90	0.002853	0.01082	0.024492	-0.018786	10	0.004993	0.005141	0.000477	0.036367	-0.023866	90	1860
95	-0.003644	0.009658	0.015673	-0.022961	11	-0.000331	-0.001047	0.000444	0.032091	-0.02415	100	1855
100	-0.00846	0.009872	0.011284	-0.028203	10	-0.003544	-0.005909	0.000448	0.031202	-0.024698	90	1850
105	-0.010814	0.009331	0.007848	-0.029477	11	-0.006614	-0.009456	0.000451	0.028332	-0.026511	100	1845
110	-0.012112	0.00979	0.007468	-0.031692	10	-0.006995	-0.010516	0.00047	0.029108	-0.027687	90	1840
115	-0.010737	0.009382	0.008027	-0.0295	11	-0.006952	-0.009543	0.000473	0.029838	-0.029831	100	1835
120	-0.009415	0.008862	0.00831	-0.02714	10	-0.004097	-0.006663	0.000461	0.031352	-0.026621	90	1830
125	-0.004285	0.007879	0.011473	-0.020043	11	-0.000969	-0.002501	0.000438	0.031528	-0.024973	100	1825
130	0.003214	0.007878	0.018969	-0.012541	10	0.00515	0.00424	0.00041	0.033313	-0.021133	90	1820
135	0.01228	0.0073	0.02688	-0.00232	11	0.012213	0.012014	0.000377	0.036895	-0.011541	100	1815
140	0.021845	0.007443	0.036732	0.006959	10	0.019633	0.020519	0.000396	0.042845	-0.011978	90	1810
145	0.031447	0.007404	0.046255	0.016639	11	0.02805	0.030211	0.00044	0.049203	-0.010469	100	1805
150	0.040487	0.008727	0.057942	0.023033	10	0.034156	0.037969	0.000568	0.057764	-0.012889	90	1800
155	0.048179	0.009498	0.067175	0.029183	11	0.041281	0.045444	0.000674	0.071578	-0.013446	100	1795
160	0.051004	0.013979	0.078962	0.023045	10	0.041784	0.046155	0.000781	0.078865	-0.018111	90	1790
165	0.049784	0.015743	0.081269	0.018298	11	0.042073	0.045581	0.000828	0.083532	-0.022258	100	1785
170	0.046121	0.017391	0.080902	0.01134	10	0.037374	0.040759	0.000861	0.082557	-0.026861	90	1780
175	0.038348	0.01615	0.070647	0.006049	11	0.032038	0.03519	0.000835	0.07514	-0.030914	100	1775
180	0.027712	0.015413	0.058539	-0.003115	10	0.022502	0.025622	0.000768	0.060495	-0.03623	90	1770
185	0.013958	0.01293	0.039819	-0.011902	11	0.010663	0.013909	0.000658	0.047628	-0.041434	100	1765
190	-0.001377	0.013083	0.024788	-0.027543	10	-0.002661	-0.002292	0.000597	0.037475	-0.047656	90	1760
195	-0.016996	0.01328	0.009564	-0.043556	11	-0.017766	-0.018868	0.000585	0.025551	-0.05463	100	1755
200	-0.032536	0.015245	-0.002047	-0.063025	10	-0.031701	-0.032537	0.000638	0.012967	-0.065964	90	1750
205	-0.046927	0.015366	-0.016196	-0.077658	11	-0.046416	-0.047208	0.000689	-0.00074	-0.087288	100	1745
210	-0.06041	0.016584	-0.027241	-0.093579	10	-0.05847	-0.05858	0.000693	-0.012211	-0.104247	90	1740
215	-0.072217	0.015196	-0.041825	-0.102609	11	-0.070701	-0.07069	0.000677	-0.024936	-0.116598	100	1735
220	-0.082578	0.01512	-0.052338	-0.112818	10	-0.081191	-0.080673	0.00065	-0.038377	-0.121071	90	1730
225	-0.091674	0.013677	-0.06432	-0.119028	11	-0.091017	-0.089804	0.000602	-0.05244	-0.12646	100	1725
230	-0.10006	0.014794	-0.070471	-0.129648	10	-0.100451	-0.098883	0.000573	-0.065522	-0.137449	90	1720
235	-0.108162	0.014706	-0.078749	-0.137575	11	-0.108825	-0.107598	0.000589	-0.077088	-0.147856	100	1715
240	-0.11626	0.015894	-0.084471	-0.148049	10	-0.118489	-0.116841	0.000596	-0.085954	-0.158821	90	1710
245	-0.125377	0.014524	-0.09633	-0.154424	11	-0.12754	-0.126008	0.000591	-0.096314	-0.169028	100	1705
250	-0.135374	0.014205	-0.106964	-0.163785	10	-0.138156	-0.136459	0.000573	-0.106511	-0.178653	90	1700
255	-0.1466	0.011951	-0.122698	-0.170501	11	-0.149163	-0.147779	0.00054	-0.119617	-0.188823	100	1695
260	-0.159024	0.011464	-0.136097	-0.181952	10	-0.162069	-0.161009	0.000505	-0.134637	-0.196632	90	1690
265	-0.173301	0.01051	-0.15228	-0.194322	11	-0.175942	-0.175107	0.000475	-0.150432	-0.208408	100	1685
270	-0.187694	0.010722	-0.16625	-0.209137	10	-0.18977	-0.188743	0.000452	-0.166292	-0.221616	90	1680
275	-0.202446	0.009738	-0.182971	-0.221921	11	-0.204225	-0.202958	0.000428	-0.182191	-0.234453	100	1675
280	-0.217775	0.009948	-0.197878	-0.237671	10	-0.218675	-0.217416	0.000389	-0.198894	-0.246239	90	1670
285	-0.233543	0.008919	-0.215704	-0.251382	11	-0.233643	-0.233175	0.000351	-0.21427	-0.25689	100	1665
290	-0.249364	0.00927	-0.230823	-0.267904	10	-0.248619	-0.248181	0.00034	-0.228557	-0.270285	90	1660
295	-0.264318	0.008439	-0.24744	-0.281196	11	-0.263367	-0.263098	0.00035	-0.241742	-0.284631	100	1655
300	-0.279739	0.00896	-0.261819	-0.297659	10	-0.277314	-0.277588	0.000388	-0.250219	-0.300011	90	1650
305	-0.294573	0.00841	-0.277754	-0.311393	11	-0.291391	-0.291989	0.000434	-0.258679	-0.314392	100	1645
310	-0.308848	0.008994	-0.290859	-0.326836	10	-0.303026	-0.304787	0.000532	-0.260166	-0.329554	90	1640
315	-0.322389	0.009624	-0.303141	-0.341636	11	-0.316121	-0.318344	0.000634	-0.26326	-0.346505	100	1635
320	-0.333777	0.011264	-0.31125	-0.356305	10	-0.323936	-0.328084	0.000766	-0.261817	-0.361112	90	1630
325	-0.341213	0.014459	-0.312295	-0.370131	11	-0.332832	-0.338143	0.000863	-0.263589	-0.375107	100	1625
330	-0.344285	0.018826	-0.306634	-0.381936	10	-0.334096	-0.33949	0.000977	-0.262672	-0.384191	90	1620
335	-0.340635	0.020984	-0.298667	-0.382603	11	-0.334627	-0.339666	0.001027	-0.26298	-0.391135	100	1615
340	-0.334155	0.022915	-0.288325	-0.379985	10	-0.329102	-0.332444	0.00099	-0.261932	-0.380002	90	1610
345	-0.325242	0.020409	-0.284424	-0.36606	11	-0.322875	-0.325197	0.000899	-0.261792	-0.371699	100	1605
350	-0.315455	0.019865	-0.275725	-0.355184	10	-0.314426	-0.316395	0.000824	-0.258509	-0.362248	90	1600
355	-0.304356	0.019123	-0.26611	-0.342601	11	-0.304204	-0.304294	0.000799	-0.254523	-0.35367	100	1595
360	-0.294539	0.021636	-0.251267	-0.337811	10	-0.295665	-0.294486	0.00089	-0.241103	-0.34666	90	1590
365	-0.286108	0.021989	-0.242129	-0.330087	11	-0.285168	-0.284176	0.001035	-0.221815	-0.3405	100	1585
370	-0.278199	0.023926	-0.230348	-0.32605	10	-0.278648	-0.277142	0.001046	-0.209798	-0.333055	90	1580
375	-0.268887	0.022175	-0.224538	-0.313236	11	-0.269256	-0.267526	0.00106	-0.198791	-0.325628	100	1575
380	-0.260104	0.022044	-0.216016	-0.304192	10	-0.263539	-0.261321	0.000956	-0.205338	-0.318672	90	1570
385	-0.252429	0.01932	-0.21379	-0.291068	11	-0.257718	-0.255186	0.000882	-0.293332	-0.313295	100	1565
390	-0.247973	0.018781	-0.210411	-0.285536	10	-0.254629	-0.252436	0.000826	-0.208175	-0.306415	90	1560
395	-0.247493	0.016732	-0.214029	-0.280957	11	-0.254074	-0.252635	0.000786	-0.204893	-0.307713	100	1555
400	-0.250192	0.017028	-0.216135	-0.284249	10	-0.254912	-0.254323	0.000744	-0.208882	-0.303649	90	1550
405	-0.254197	0.01551	-0.223176	-0.285218	11	-0.256857	-0.256477	0.000704	-0.214815	-0.305399	100	1545
410	-0.257763	0.01561	-0.226543	-0.288984	10	-0.25945	-0.258746	0.000689	-0.218881	-0.305641	90	1540
415	-0.260127	0.014363	-0.2314	-0.288853	11	-0.261394	-0.260513	0.000668	-0.221855	-0.306468	100	1535
420	-0.262034	0.015807	-0.230421	-0.293648	10	-0.265424	-0.264761	0.000692	-0.223161	-0.312016	90	1530
425	-0.265391	0.016351	-0.232688	-0.298094	11	-0.268807	-0.26737	0.000715	-0.230362	-0.318476	100	1525
430	-0.271906	0.018313	-0.235281	-0.308531	10	-0.275567	-0.274304	0.000742	-0.232595	-0.324904	90	1520
435	-0.282151	0.016858	-0.248434	-0.315868	11	-0.28378	-0.283426	0.000708	-0.239816	-0.32986	100	1515
440	-0.295048	0.017076	-0.260897	-0.3292	10	-0.293585	-0.294395	0.000724	-0.246279	-0.338031	90	1510
445	-0.308201	0.017467	-0.273268	-0.343135	11	-0.303446	-0.306785	0.000792	-0.245124	-0.344536	100	1505
450	-0.319364	0.021858	-0.275647	-0.36308	10	-0.311364	-0.315028	0.0009	-0.247871	-0.356737	90	1500
455	-0.326978	0.023868	-0.279242	-0.374714	11	-0.319301	-0.3233	0.001043	-0.246342	-0.372334	100	1495
460	-0.327721	0.02889	-0.269942	-0.385501	10	-0.324262	-0.326715	0.001128	-0.253147	-0.385893	90	1490
465	-0.329863	0.028341	-0.273181	-0.386545	11	-0.329714	-0.331899	0.001207	-0.253611	-0.40177	100	1485
470	-0.333381	0.030328	-0.272725	-0.394037	10	-0.333704	-0.335188	0.001206	-0.25609	-0.406622	90	1480
475	-0.339156	0.028308	-0.282539	-0.395773	11	-0.337363	-0.339692	0.001268	-0.252386	-0.410422	100	1475
480	-0.346276	0.029365	-0.287547	-0.405006	10	-0.342338	-0.345502	0.001242	-0.258275	-0.409599	90	1470
485	-0.351335	0.027036	-0.297262	-0.405408	11	-0.344974	-0.349271	0.001246	-0.257295	-0.410523	100	1465
490	-0.352734	0.028478	-0.295778	-0.409689	10	-0.348095	-0.352155	0.001196	-0.265005	-0.411326	90	1460
495	-0.352334	0.026792	-0.298749	-0.405919	11	-0.349238	-0.352062	0.001134	-0.278691	-0.413448	100	1455
500	-0.352951	0.027225	-0.2985	-0.407401	10	-0.352066	-0.352859	0.001056	-0.289739	-0.418266	90	1450
505	-0.354845	0.02417	-0.306506	-0.403185	11	-0.355504	-0.355261	0.000956	-0.29847	-0.420186	100	1445
510	-0.361813	0.022867	-0.316078	-0.407547	10	-0.359518	-0.360382	0.000948	-0.29838	-0.420745	90	1440
515	-0.371001	0.021087	-0.328828	-0.413174	11	-0.365714	-0.369182	0.000959	-0.300997	-0.419941	100	1435
520	-0.379739	0.023822	-0.332096	-0.427382	10	-0.367861	-0.367372	0.001063	-0.349649	-0.42213	90	1430
525	-0.382928	0.024932	-0.333063	-0.432793	11	-0.371557	-0.375799	0.001168	-0.292451	-0.431827	100	1425
530	-0.380592	0.027698	-0.325195	-0.435989	10	-0.367414	-0.370383	0.001264	-0.287459	-0.435362	90	1420
535	-0.372143	0.026626	-0.318891	-0.425395	11	-0.363029	-0.364372	0.001306	-0.284909	-0.440833	100	1415
540	-0.359867	0.027821	-0.304226	-0.415509	10	-0.351338	-0.352456	0.001299	-0.2767	-0.436794	90	1410
545	-0.344718	0.02546	-0.293797	-0.395638	11	-0.340085	-0.339693	0.001265	-0.232873	-0.425811	100	1405
550	-0.327344	0.02517	-0.277004	-0.377684	10	-0.324776	-0.325033	0.001167	-0.258616	-0.39731	90	1400
555	-0.309614	0.02273	-0.264154	-0.355074	11	-0.307956	-0.304855	0.001032	-0.296926	-0.367694	100	1395
560	-0.290132	0.022438	-0.245256	-0.335007	10	-0.291389	-0.290687	0.000946	-0.238804	-0.35164	90	1390
565	-0.269803	0.020342	-0.229119	-0.310486	11	-0.272142	-0.269515	0.000898	-0.22594	-0.334652	100	1385
570	-0.24894	0.021274	-0.206393	-0.291488	10	-0.25586	-0.251512	0.000932	-0.210495	-0.326901	90	1380
575	-0.229317	0.019512	-0.190293	-0.268341	11	-0.2375	-0.238735	0.000956	-0.192036	-0.271449	100	1375
580	-0.211919	0.0181	-0.175718	-0.24812	10	-0.224948	-0.219268	0.000999	-0.175731	-0.304911	90	1370
585	-0.201591	0.015424	-0.170742	-0.232439	11	-0.212628	-0.207856	0.000947	-0.165987	-0.292289	100	1365
590	-0.195805	0.014843	-0.166119	-0.22549	10	-0.207943	-0.203106	0.000901	-0.161385	-0.280663	90	1360
595	-0.195444	0.014403	-0.166637	-0.224251	11	-0.203854	-0.199945	0.000828	-0.162831	-0.270065	100	1355
600	-0.197546	0.014276	-0.168995	-0.226098	10	-0.20502	-0.202094	0.00073	-0.172181	-0.264111	90	1350
605	-0.203322	0.011584	-0.180155	-0.226489	11	-0.208319	-0.206055	0.000626	-0.177678	-0.259824	100	1345
610	-0.212036	0.010444	-0.191148	-0.232924	10	-0.213901	-0.213031	0.00053	-0.183922	-0.251491	90	1340
615	-0.221893	0.009678	-0.202537	-0.241249	11	-0.221202	-0.221468	0.000478	-0.190153	-0.25239	100	1335
620	-0.23151	0.010772	-0.209966	-0.253053	10	-0.22731	-0.229253	0.000516	-0.193149	-0.254867	90	1330
625	-0.238302	0.012	-0.214302	-0.262302	11	-0.234428	-0.236999	0.000567	-0.196611	-0.263453	100	1325
630	-0.242765	0.014566	-0.213634	-0.271897	10	-0.23839	-0.239953	0.000642	-0.197645	-0.272939	90	1320
635	-0.244153	0.015167	-0.21382	-0.274486	11	-0.242352	-0.246884	0.000696	-0.200268	-0.261054	100	1315
640	-0.244614	0.016318	-0.211978	-0.277249	10	-0.243473	-0.244157	0.000686	-0.19894	-0.284673	90	1310
645	-0.244533	0.01459	-0.215353	-0.273713	11	-0.244527	-0.239994	0.000637	-0.219878	-0.281631	100	1305
650	-0.243902	0.014554	-0.214793	-0.27301	10	-0.244804	-0.245246	0.000591	-0.206442	-0.284701	90	1300
655	-0.242783	0.013802	-0.215179	-0.270388	11	-0.243819	-0.242774	0.00059	-0.207934	-0.28563	100	1295
660	-0.24188	0.015628	-0.210625	-0.273136	10	-0.244084	-0.243432	0.000666	-0.209848	-0.285469	90	1290
665	-0.242188	0.016217	-0.209754	-0.274622	11	-0.243769	-0.244534	0.000739	-0.199649	-0.286611	100	1285
670	-0.24397	0.01824	-0.20749	-0.280449	10	-0.246413	-0.247195	0.000762	-0.194007	-0.287811	90	1280
675	-0.246996	0.017012	-0.212972	-0.281021	11	-0.248169	-0.25339	0.000736	-0.203939	-0.268233	100	1275
680	-0.25092	0.016614	-0.217693	-0.284148	10	-0.25212	-0.252757	0.00068	-0.210623	-0.293683	90	1270
685	-0.25689	0.014659	-0.227572	-0.286207	11	-0.257612	-0.257629	0.000612	-0.220454	-0.295421	100	1265
690	-0.263956	0.015021	-0.233914	-0.293998	10	-0.262776	-0.264138	0.000598	-0.223871	-0.298979	90	1260
695	-0.271139	0.014782	-0.241574	-0.300704	11	-0.269518	-0.270019	0.000644	-0.229174	-0.308553	100	1255
700	-0.277384	0.016441	-0.244502	-0.310267	10	-0.273738	-0.275049	0.000691	-0.231288	-0.317392	90	1250
705	-0.281907	0.016003	-0.249901	-0.313913	11	-0.278743	-0.278841	0.000719	-0.234696	-0.325339	100	1245
710	-0.284522	0.015979	-0.252564	-0.31648	10	-0.279996	-0.280626	0.000717	-0.236919	-0.324853	90	1240
715	-0.284536	0.012352	-0.259832	-0.309241	11	-0.281505	-0.281566	0.000665	-0.239338	-0.323473	100	1235
720	-0.282221	0.012519	-0.257183	-0.30726	10	-0.279831	-0.280375	0.000574	-0.244088	-0.313135	90	1230
725	-0.278666	0.011237	-0.256193	-0.30114	11	-0.276849	-0.277275	0.000492	-0.245101	-0.307367	100	1225
730	-0.274196	0.011259	-0.251677	-0.296714	10	-0.273478	-0.273003	0.000454	-0.24463	-0.303499	90	1220
735	-0.26938	0.01028	-0.248819	-0.28994	11	-0.269143	-0.268285	0.000442	-0.242802	-0.299099	100	1215
740	-0.264481	0.010567	-0.243347	-0.285616	10	-0.265477	-0.26464	0.000438	-0.23782	-0.295302	90	1210
745	-0.259622	0.009288	-0.241047	-0.278198	11	-0.260803	-0.260148	0.000422	-0.235844	-0.288638	100	1205
750	-0.255605	0.009484	-0.236638	-0.274573	10	-0.257242	-0.256274	0.000397	-0.234868	-0.282746	90	1200
755	-0.252425	0.008613	-0.2352	-0.269651	11	-0.25393	-0.252905	0.000369	-0.232139	-0.277319	100	1195
760	-0.250036	0.008722	-0.232592	-0.267479	10	-0.251001	-0.250511	0.000354	-0.229997	-0.273892	90	1190
765	-0.248772	0.007804	-0.233165	-0.26438	11	-0.249083	-0.248933	0.000361	-0.227213	-0.270098	100	1185
770	-0.248272	0.00798	-0.232311	-0.264232	10	-0.246334	-0.246574	0.000383	-0.218902	-0.268674	90	1180
775	-0.247701	0.007763	-0.232174	-0.263227	11	-0.244351	-0.245575	0.000424	-0.211871	-0.267615	100	1175
780	-0.245433	0.008911	-0.227612	-0.263254	10	-0.239781	-0.241832	0.000476	-0.203742	-0.262681	90	1170
785	-0.240529	0.009062	-0.222404	-0.258654	11	-0.235332	-0.25568	0.00055	-0.199721	-0.255183	100	1165
790	-0.233433	0.010045	-0.213344	-0.253523	10	-0.226802	-0.229286	0.000575	-0.182014	-0.253477	90	1160
795	-0.223347	0.010539	-0.20227	-0.244425	11	-0.218132	-0.219434	0.00059	-0.172519	-0.248675	100	1155
800	-0.209997	0.012858	-0.184281	-0.235713	10	-0.20503	-0.206443	0.000592	-0.1608	-0.238133	90	1150
805	-0.193959	0.012852	-0.168255	-0.219663	11	-0.191303	-0.192501	0.000594	-0.150465	-0.225246	100	1145
810	-0.175819	0.013709	-0.148401	-0.203237	10	-0.174308	-0.175387	0.000575	-0.134446	-0.208101	90	1140
815	-0.156543	0.012646	-0.131251	-0.181834	11	-0.156978	-0.157428	0.000544	-0.119269	-0.190116	100	1135
820	-0.137138	0.012894	-0.11135	-0.162925	10	-0.139626	-0.139645	0.000538	-0.105497	-0.1748	90	1130
825	-0.117847	0.01236	-0.093128	-0.142566	11	-0.120927	-0.120568	0.000562	-0.087467	-0.159772	100	1125
830	-0.099329	0.013985	-0.07136	-0.127298	10	-0.104512	-0.103528	0.000662	-0.067585	-0.148	90	1120
835	-0.082143	0.014469	-0.053204	-0.111081	11	-0.086879	-0.085929	0.000728	-0.043151	-0.135751	100	1115
840	-0.066331	0.016148	-0.034034	-0.098628	10	-0.073819	-0.072334	0.000814	-0.023902	-0.127606	90	1110
845	-0.053005	0.015378	-0.022249	-0.083762	11	-0.059712	-0.057298	0.000831	-0.012728	-0.116578	100	1105
850	-0.042418	0.015422	-0.011574	-0.073261	10	-0.050795	-0.047365	0.00083	-0.010583	-0.110681	90	1100
855	-0.03546	0.012943	-0.009575	-0.061346	11	-0.04286	-0.037802	0.000759	-0.012954	-0.103685	100	1095
860	-0.028336	0.008877	-0.010582	-0.046091	10	-0.039779	-0.0324	0.000681	-0.017182	-0.097597	90	1090
865	-0.02919	0.006221	-0.016748	-0.041633	11	-0.039207	-0.032994	0.000582	-0.020742	-0.089912	100	1085
870	-0.033976	0.007085	-0.019806	-0.048146	10	-0.043069	-0.038433	0.000533	-0.023694	-0.08598	90	1080
875	-0.045992	0.011132	-0.023728	-0.068256	11	-0.049648	-0.046692	0.00052	-0.026784	-0.087432	100	1075
880	-0.056687	0.013511	-0.029665	-0.083709	10	-0.056668	-0.054556	0.000564	-0.028614	-0.09639	90	1070
885	-0.06758	0.014242	-0.039097	-0.096064	11	-0.064815	-0.063459	0.000643	-0.029385	-0.108782	100	1065
890	-0.075048	0.015333	-0.044382	-0.105714	10	-0.070344	-0.068635	0.00074	-0.02804	-0.122535	90	1060
895	-0.08144	0.015103	-0.051234	-0.111647	11	-0.077183	-0.075201	0.000866	-0.026433	-0.138934	100	1055
900	-0.086083	0.017804	-0.050476	-0.12169	10	-0.078726	-0.07858	0.001013	-0.015317	-0.147842	90	1050
905	-0.090574	0.020845	-0.048885	-0.132263	11	-0.081968	-0.08184	0.001134	-0.013597	-0.158422	100	1045
910	-0.090035	0.02387	-0.042296	-0.137775	10	-0.079321	-0.08064	0.001194	-0.003018	-0.160465	90	1040
915	-0.085046	0.024309	-0.036428	-0.133663	11	-0.075359	-0.077839	0.001176	0.00267	-0.143836	100	1035
920	-0.074396	0.02627	-0.021857	-0.126936	10	-0.065037	-0.067214	0.001145	0.013741	-0.122329	90	1030
925	-0.058688	0.023038	-0.012612	-0.104763	11	-0.051473	-0.081865	0.001004	0.012629	-0.091623	100	1025
930	-0.039709	0.019892	7.6e-05	-0.079494	10	-0.034626	-0.038266	0.00089	0.030574	-0.081676	90	1020
935	-0.013458	0.018072	0.022686	-0.049602	11	-0.014423	-0.015562	0.000789	0.044699	-0.066956	100	1015
940	0.011035	0.01922	0.049474	-0.027404	10	0.004131	0.006199	0.000921	0.059946	-0.06113	90	1010
945	0.031392	0.022709	0.07681	-0.014027	11	0.02535	0.028315	0.001092	0.087254	-0.047084	100	1005
950	0.047332	0.027725	0.102781	-0.008117	10	0.039218	0.040615	0.001319	0.116966	-0.041084	90	1000
955	0.058877	0.028688	0.116253	0.001501	11	0.054777	0.053663	0.001488	0.155059	-0.030532	100	995
960	0.067089	0.031046	0.129181	0.004996	10	0.060728	0.059582	0.001488	0.163034	-0.022016	90	990
965	0.071746	0.027765	0.127276	0.016217	11	0.06793	0.06822	0.001419	0.153786	-0.012621	100	985
970	0.074107	0.026391	0.12689	0.021325	10	0.067949	0.070664	0.001234	0.138318	-0.005112	90	980
975	0.07251	0.021686	0.115881	0.029138	11	0.066798	0.070045	0.001004	0.123277	0.001357	100	975
980	0.068166	0.019761	0.107689	0.028643	10	0.063784	0.064258	0.000878	0.116764	0.005695	90	970
985	0.061266	0.017843	0.096953	0.025579	11	0.058388	0.057945	0.000794	0.110956	0.007405	100	965
990	0.054276	0.018948	0.092171	0.016381	10	0.054233	0.052836	0.000778	0.109238	0.008244	90	960
995	0.047432	0.017	0.081433	0.013432	11	0.047581	0.046461	0.000768	0.101089	0.004179	100	955
1000	0.04214	0.015947	0.074034	0.010246	10	0.043371	0.041842	0.000672	0.090587	0.002324	90	950
1005	0.038546	0.013621	0.065788	0.011304	11	0.039393	0.037797	0.000587	0.079507	0.003254	100	945
1010	0.035839	0.014426	0.06469	0.006987	10	0.03606	0.035534	0.000567	0.072605	0.000406	90	940
1015	0.033025	0.014268	0.061561	0.004488	11	0.033718	0.033232	0.000599	0.070216	-0.003429	100	935
1020	0.029371	0.014948	0.059267	-0.000524	10	0.030366	0.029712	0.000622	0.070148	-0.007062	90	930
1025	0.028105	0.014901	0.057906	-0.001697	11	0.028509	0.027631	0.000639	0.067317	-0.009378	100	925
1030	0.026693	0.015174	0.057041	-0.003655	10	0.025421	0.025281	0.000613	0.063374	-0.011401	90	920
1035	0.024292	0.013706	0.051704	-0.00312	11	0.021868	0.022434	0.00056	0.054419	-0.01417	100	915
1040	0.019903	0.013587	0.047077	-0.007271	10	0.017443	0.018309	0.000527	0.048728	-0.016574	90	910
1045	0.014133	0.012604	0.039342	-0.011075	11	0.011843	0.012711	0.000517	0.042157	-0.023086	100	905
1050	0.00785	0.013993	0.035837	-0.020137	10	0.006542	0.006728	0.000515	0.036171	-0.028013	90	900
1055	0.00177	0.01381	0.029389	-0.02585	11	0.00078	0.000899	0.000516	0.032954	-0.030551	100	895
1060	-0.00362	0.014742	0.025865	-0.033104	10	-0.004788	-0.004552	0.000518	0.026775	-0.036468	90	890
1065	-0.008602	0.013779	0.018956	-0.036159	11	-0.010328	-0.009994	0.00052	0.020212	-0.044106	100	885
1070	-0.013837	0.014877	0.015916	-0.04359	10	-0.016747	-0.016785	0.000554	0.017487	-0.052449	90	880
1075	-0.019994	0.015138	0.010282	-0.05027	11	-0.023067	-0.023862	0.000615	0.015131	-0.059717	100	875
1080	-0.028801	0.016461	0.004122	-0.061724	10	-0.032074	-0.033696	0.000655	0.011163	-0.070662	90	870
1085	-0.040246	0.014887	-0.010472	-0.070021	11	-0.040232	-0.042636	0.000697	0.008285	-0.0791	100	865
1090	-0.048948	0.016319	-0.01631	-0.081586	10	-0.050302	-0.053225	0.000675	-0.004301	-0.0885	90	860
1095	-0.059566	0.01514	-0.029287	-0.089846	11	-0.060098	-0.06208	0.000663	-0.019398	-0.09781	100	855
1100	-0.070465	0.015555	-0.039355	-0.101576	10	-0.070938	-0.07188	0.000614	-0.032618	-0.107403	90	850
1105	-0.081647	0.014051	-0.053545	-0.109749	11	-0.082299	-0.082725	0.000568	-0.047064	-0.116833	100	845
1110	-0.093182	0.014079	-0.065024	-0.12134	10	-0.092681	-0.093433	0.000566	-0.054646	-0.126549	90	840
1115	-0.105206	0.012341	-0.080525	-0.129887	11	-0.104466	-0.11362	0.000561	-0.076001	-0.124889	100	835
1120	-0.11773	0.011738	-0.094254	-0.141206	10	-0.114753	-0.115822	0.000565	-0.078061	-0.149959	90	830
1125	-0.129494	0.009286	-0.110922	-0.148066	11	-0.125398	-0.127045	0.000509	-0.084715	-0.152455	100	825
1130	-0.138577	0.007909	-0.122758	-0.154395	10	-0.133101	-0.135879	0.000457	-0.098713	-0.153586	90	820
1135	-0.144614	0.006165	-0.132283	-0.156944	11	-0.139875	-0.142488	0.000385	-0.106761	-0.156045	100	815
1140	-0.148506	0.005424	-0.137659	-0.159353	10	-0.144537	-0.146372	0.000335	-0.114211	-0.159237	90	810
1145	-0.150795	0.004646	-0.141503	-0.160087	11	-0.148211	-0.149173	0.000294	-0.123961	-0.162602	100	805
1150	-0.152459	0.004662	-0.143134	-0.161784	10	-0.151013	-0.151597	0.000265	-0.130298	-0.165954	90	800
1155	-0.154529	0.004626	-0.145277	-0.163781	11	-0.153758	-0.151671	0.00025	-0.145986	-0.166702	100	795
1160	-0.157314	0.005409	-0.146497	-0.168131	10	-0.156189	-0.156281	0.000248	-0.140834	-0.170997	90	790
1165	-0.160469	0.005801	-0.148867	-0.172071	11	-0.158753	-0.158756	0.000257	-0.143381	-0.174839	100	785
1170	-0.162791	0.006854	-0.149083	-0.176499	10	-0.160236	-0.159839	0.000276	-0.143779	-0.177201	90	780
1175	-0.164244	0.007299	-0.149647	-0.178842	11	-0.161769	-0.161411	0.000307	-0.143863	-0.181556	100	775
1180	-0.163859	0.008182	-0.147495	-0.180223	10	-0.161928	-0.160741	0.000348	-0.143701	-0.184187	90	770
1185	-0.162689	0.008078	-0.146533	-0.178846	11	-0.161929	-0.159601	0.000392	-0.143683	-0.189798	100	765
1190	-0.160083	0.008431	-0.143221	-0.176944	10	-0.160165	-0.157235	0.000366	-0.143297	-0.189044	90	760
1195	-0.157328	0.007682	-0.141964	-0.172693	11	-0.159163	-0.155972	0.000385	-0.142908	-0.18998	100	755
1200	-0.154869	0.007855	-0.139159	-0.17058	10	-0.157732	-0.155111	0.000386	-0.141795	-0.187145	90	750
1205	-0.155039	0.008061	-0.138917	-0.17116	11	-0.156454	-0.154706	0.000385	-0.140762	-0.182925	100	745
1210	-0.15346	0.008635	-0.136189	-0.17073	10	-0.155276	-0.153963	0.000387	-0.138592	-0.181942	90	740
1215	-0.151391	0.008191	-0.135009	-0.167772	11	-0.153227	-0.151441	0.000419	-0.135186	-0.179902	100	735
1220	-0.148328	0.008497	-0.131334	-0.165323	10	-0.152197	-0.150038	0.00044	-0.133015	-0.182235	90	730
1225	-0.146041	0.007869	-0.130304	-0.161778	11	-0.150921	-0.148408	0.000417	-0.131344	-0.184203	100	725
1230	-0.145672	0.008296	-0.129081	-0.162263	10	-0.151952	-0.149475	0.000446	-0.129789	-0.18816	90	720
1235	-0.147927	0.007826	-0.132275	-0.163579	11	-0.152947	-0.151001	0.00044	-0.130696	-0.188942	100	715
1240	-0.15223	0.008021	-0.136188	-0.168273	10	-0.157164	-0.155734	0.000435	-0.13299	-0.192694	90	710
1245	-0.158949	0.007642	-0.143665	-0.174233	11	-0.162166	-0.161439	0.000417	-0.137612	-0.194096	100	705
1250	-0.167023	0.007994	-0.151036	-0.18301	10	-0.169104	-0.168677	0.000394	-0.142148	-0.194314	90	700
1255	-0.176026	0.007242	-0.161543	-0.190509	11	-0.176861	-0.176629	0.000359	-0.156626	-0.197383	100	695
1260	-0.185458	0.007235	-0.170989	-0.199927	10	-0.185436	-0.185259	0.000325	-0.166461	-0.204417	90	690
1265	-0.194871	0.007062	-0.180747	-0.208995	11	-0.194494	-0.194228	0.000304	-0.175111	-0.212617	100	685
1270	-0.203642	0.008331	-0.186981	-0.220304	10	-0.202991	-0.203948	0.00032	-0.180893	-0.221048	90	680
1275	-0.211088	0.008963	-0.193162	-0.229013	11	-0.211504	-0.212392	0.000358	-0.186609	-0.230925	100	675
1280	-0.218409	0.010206	-0.197998	-0.23882	10	-0.219611	-0.220402	0.000381	-0.19413	-0.241952	90	670
1285	-0.226144	0.010187	-0.20577	-0.246518	11	-0.228023	-0.2368	0.00041	-0.203857	-0.243756	100	665
1290	-0.235249	0.011535	-0.212178	-0.25832	10	-0.237559	-0.238011	0.000422	-0.209666	-0.262126	90	660
1295	-0.245945	0.012067	-0.221811	-0.27008	11	-0.247062	-0.24786	0.000524	-0.215243	-0.274701	100	655
1300	-0.258432	0.013938	-0.230556	-0.286307	10	-0.258227	-0.259114	0.000538	-0.22203	-0.287626	90	650
1305	-0.271076	0.014073	-0.242929	-0.299223	11	-0.268244	-0.269434	0.000593	-0.231233	-0.300578	100	645
1310	-0.281573	0.015974	-0.249624	-0.313521	10	-0.278173	-0.279048	0.000604	-0.240051	-0.31221	90	640
1315	-0.291324	0.015459	-0.260406	-0.322242	11	-0.28821	-0.289505	0.000619	-0.249185	-0.32436	100	635
1320	-0.300938	0.016494	-0.26795	-0.333925	10	-0.297046	-0.298697	0.000646	-0.254652	-0.33516	90	630
1325	-0.309967	0.015951	-0.278065	-0.341869	11	-0.306768	-0.308076	0.000689	-0.262242	-0.349204	100	625
1330	-0.318286	0.017915	-0.282455	-0.354117	10	-0.313039	-0.314709	0.000758	-0.264647	-0.360026	90	620
1335	-0.325314	0.018113	-0.289087	-0.36154	11	-0.320951	-0.32287	0.000825	-0.268503	-0.369289	100	615
1340	-0.331075	0.019378	-0.292319	-0.36983	10	-0.325229	-0.327881	0.000857	-0.269129	-0.375387	90	610
1345	-0.334726	0.016638	-0.301449	-0.368003	11	-0.329499	-0.331663	0.00081	-0.274389	-0.377024	100	605
1350	-0.336626	0.01327	-0.310086	-0.363165	10	-0.329181	-0.331798	0.000701	-0.276502	-0.364409	90	600
1355	-0.332738	0.010196	-0.312347	-0.35313	11	-0.327427	-0.329113	0.000581	-0.282174	-0.358635	100	595
1360	-0.326017	0.0095	-0.307016	-0.345017	10	-0.32279	-0.324006	0.000494	-0.285865	-0.350265	90	590
1365	-0.317649	0.008245	-0.301158	-0.334139	11	-0.316319	-0.316596	0.000426	-0.290685	-0.342823	100	585
1370	-0.308324	0.008219	-0.291886	-0.324762	10	-0.30987	-0.30886	0.000433	-0.286299	-0.340784	90	580
1375	-0.299259	0.007907	-0.283444	-0.315073	11	-0.30247	-0.300251	0.000458	-0.281369	-0.342337	100	575
1380	-0.29182	0.009162	-0.273495	-0.310145	10	-0.29828	-0.294901	0.000526	-0.274857	-0.344021	90	570
1385	-0.288151	0.010751	-0.266649	-0.309654	11	-0.294492	-0.290607	0.000584	-0.269573	-0.347268	100	565
1390	-0.287709	0.013335	-0.26104	-0.314379	10	-0.295674	-0.292554	0.000662	-0.263755	-0.349257	90	560
1395	-0.290889	0.013497	-0.263896	-0.317882	11	-0.297101	-0.294984	0.000723	-0.259038	-0.353914	100	555
1400	-0.296382	0.014555	-0.267271	-0.325493	10	-0.303138	-0.300454	0.000721	-0.261	-0.35755	90	550
1405	-0.303993	0.01404	-0.275914	-0.332073	11	-0.308937	-0.307184	0.000743	-0.269378	-0.361931	100	545
1410	-0.313382	0.014982	-0.283419	-0.343346	10	-0.318876	-0.317508	0.000729	-0.275371	-0.367515	90	540
1415	-0.325268	0.014422	-0.296425	-0.354112	11	-0.33012	-0.328353	0.000697	-0.28935	-0.378103	100	535
1420	-0.340106	0.015061	-0.309985	-0.370227	10	-0.34452	-0.343199	0.000648	-0.307672	-0.386895	90	530
1425	-0.357783	0.013663	-0.330456	-0.38511	11	-0.360383	-0.358856	0.000599	-0.324376	-0.398792	100	525
1430	-0.377076	0.014032	-0.349012	-0.40514	10	-0.377193	-0.376952	0.000577	-0.340911	-0.411797	90	520
1435	-0.396711	0.013483	-0.369745	-0.423677	11	-0.395167	-0.395828	0.000591	-0.357072	-0.431781	100	515
1440	-0.415389	0.01472	-0.38595	-0.444828	10	-0.411312	-0.41222	0.00064	-0.367874	-0.449086	90	510
1445	-0.432989	0.013883	-0.405222	-0.460756	11	-0.428905	-0.430103	0.000684	-0.381569	-0.467787	100	505
1450	-0.449547	0.014588	-0.420371	-0.478724	10	-0.442952	-0.44443	0.000761	-0.383836	-0.4854	90	500
1455	-0.464291	0.014348	-0.435594	-0.492988	11	-0.458241	-0.459837	0.000809	-0.398201	-0.505529	100	495
1460	-0.476681	0.016265	-0.444151	-0.50921	10	-0.468003	-0.471147	0.000858	-0.405433	-0.515949	90	490
1465	-0.485308	0.017336	-0.450636	-0.51998	11	-0.477481	-0.481428	0.000865	-0.41216	-0.521296	100	485
1470	-0.490122	0.019718	-0.450685	-0.529558	10	-0.480848	-0.486218	0.000873	-0.417775	-0.523085	90	480
1475	-0.490073	0.018337	-0.4534	-0.526747	11	-0.482723	-0.48644	0.000863	-0.421726	-0.524501	100	475
1480	-0.485996	0.018707	-0.448581	-0.52341	10	-0.480201	-0.483768	0.00078	-0.422307	-0.522902	90	470
1485	-0.48098	0.016981	-0.447019	-0.514942	11	-0.477063	-0.478852	0.000753	-0.426013	-0.520907	100	465
1490	-0.475755	0.018282	-0.439192	-0.512318	10	-0.47234	-0.474176	0.000722	-0.422747	-0.51466	90	460
1495	-0.469822	0.01784	-0.434141	-0.505502	11	-0.466324	-0.467713	0.000709	-0.415467	-0.507723	100	455
1500	-0.463522	0.019161	-0.4252	-0.501844	10	-0.460446	-0.461531	0.000711	-0.41134	-0.500865	90	450
1505	-0.456732	0.018293	-0.420145	-0.493318	11	-0.45323	-0.454823	0.000749	-0.402013	-0.495416	100	445
1510	-0.448797	0.019666	-0.409465	-0.488128	10	-0.447006	-0.448132	0.000736	-0.395948	-0.488832	90	440
1515	-0.440507	0.01783	-0.404847	-0.476167	11	-0.439079	-0.440178	0.000752	-0.389589	-0.482819	100	435
1520	-0.430544	0.018888	-0.392768	-0.46832	10	-0.432192	-0.432517	0.000741	-0.385442	-0.477061	90	430
1525	-0.422291	0.017066	-0.388159	-0.456424	11	-0.425453	-0.424869	0.000726	-0.382781	-0.470967	100	425
1530	-0.416448	0.017261	-0.381927	-0.45097	10	-0.421098	-0.419838	0.000713	-0.379565	-0.469217	90	420
1535	-0.413352	0.01577	-0.381813	-0.444892	11	-0.417654	-0.416171	0.000714	-0.377477	-0.467006	100	415
1540	-0.411825	0.016392	-0.379042	-0.444609	10	-0.416438	-0.414993	0.000702	-0.37538	-0.46298	90	410
1545	-0.411791	0.015627	-0.380538	-0.443044	11	-0.415648	-0.39918	0.00071	-0.383191	-0.459227	100	405
1550	-0.412689	0.01702	-0.378648	-0.446729	10	-0.418418	-0.41564	0.000749	-0.377256	-0.469426	90	400
1555	-0.414616	0.016019	-0.382578	-0.446654	11	-0.419867	-0.417509	0.000768	-0.377628	-0.472421	100	395
1560	-0.418449	0.015803	-0.386844	-0.450055	10	-0.425184	-0.422447	0.000758	-0.383516	-0.477001	90	390
1565	-0.426074	0.013449	-0.399176	-0.452972	11	-0.430987	-0.428922	0.000705	-0.395583	-0.480722	100	385
1570	-0.437038	0.013034	-0.41097	-0.463106	10	-0.44179	-0.439594	0.000624	-0.410576	-0.48668	90	380
1575	-0.45105	0.011758	-0.427534	-0.474566	11	-0.453557	-0.451846	0.000575	-0.426811	-0.491623	100	375
1580	-0.46535	0.011338	-0.442674	-0.488026	10	-0.466562	-0.465755	0.000468	-0.439078	-0.498084	90	370
1585	-0.480554	0.010507	-0.45954	-0.501568	11	-0.480479	-0.48101	0.000437	-0.450941	-0.506031	100	365
1590	-0.495196	0.011915	-0.471366	-0.519025	10	-0.493204	-0.493724	0.00048	-0.46088	-0.521392	90	360
1595	-0.508606	0.01234	-0.483925	-0.533286	11	-0.506837	-0.506598	0.000544	-0.472538	-0.543541	100	355
1600	-0.520721	0.013352	-0.494018	-0.547425	10	-0.517863	-0.516982	0.000584	-0.483929	-0.560211	90	350
1605	-0.532319	0.012297	-0.507726	-0.556913	11	-0.529707	-0.528027	0.000607	-0.495657	-0.573716	100	345
1610	-0.54211	0.012275	-0.51756	-0.56666	10	-0.538785	-0.537641	0.000584	-0.504945	-0.58175	90	340
1615	-0.551285	0.011725	-0.527836	-0.574735	11	-0.547688	-0.547692	0.000548	-0.514856	-0.584439	100	335
1620	-0.557952	0.01241	-0.533132	-0.582772	10	-0.554364	-0.55444	0.000513	-0.522369	-0.58649	90	330
1625	-0.562718	0.011548	-0.539622	-0.585814	11	-0.559932	-0.559733	0.000479	-0.531055	-0.591108	100	325
1630	-0.565737	0.011815	-0.542108	-0.589367	10	-0.564424	-0.563652	0.000453	-0.537568	-0.593787	90	320
1635	-0.567796	0.01073	-0.546336	-0.589257	11	-0.568218	-0.570257	0.000447	-0.544317	-0.57871	100	315
1640	-0.569688	0.011015	-0.547659	-0.591717	10	-0.572015	-0.57179	0.000456	-0.545788	-0.602825	90	310
1645	-0.572936	0.010275	-0.552386	-0.593487	11	-0.575701	-0.575122	0.000477	-0.547536	-0.607	100	305
1650	-0.578922	0.011257	-0.556409	-0.601435	10	-0.58099	-0.580806	0.000488	-0.5541	-0.613532	90	300
1655	-0.587108	0.011054	-0.565	-0.609216	11	-0.587073	-0.586559	0.000526	-0.55712	-0.618041	100	295
1660	-0.596099	0.012023	-0.572054	-0.620144	10	-0.592687	-0.592523	0.000599	-0.554232	-0.626782	90	290
1665	-0.604702	0.011781	-0.581139	-0.628265	11	-0.599068	-0.599089	0.000679	-0.553113	-0.634232	100	285
1670	-0.612029	0.013066	-0.585898	-0.63816	10	-0.602141	-0.605111	0.000796	-0.542483	-0.6399	90	280
1675	-0.616916	0.013866	-0.589184	-0.644648	11	-0.606761	-0.612901	0.00091	-0.536078	-0.645864	100	275
1680	-0.617715	0.017827	-0.582061	-0.65337	10	-0.604662	-0.61098	0.00107	-0.526675	-0.651799	90	270
1685	-0.612705	0.02157	-0.569566	-0.655845	11	-0.602437	-0.608086	0.001219	-0.51674	-0.663234	100	265
1690	-0.602726	0.027339	-0.548047	-0.657404	10	-0.591459	-0.596795	0.001315	-0.501664	-0.673792	90	260
1695	-0.587167	0.027687	-0.531793	-0.64254	11	-0.580764	-0.584531	0.001337	-0.488335	-0.655573	100	255
1700	-0.569299	0.027995	-0.51331	-0.625289	10	-0.563067	-0.565837	0.001257	-0.475879	-0.637584	90	250
1705	-0.5479	0.024077	-0.499747	-0.596053	11	-0.543483	-0.545502	0.001122	-0.46476	-0.602044	100	245
1710	-0.524528	0.022971	-0.478586	-0.57047	10	-0.521708	-0.522846	0.001008	-0.446806	-0.580145	90	240
1715	-0.498925	0.020754	-0.457417	-0.540433	11	-0.49715	-0.497782	0.000953	-0.432728	-0.553328	100	235
1720	-0.473155	0.022018	-0.429119	-0.517191	10	-0.475292	-0.47609	0.000983	-0.411852	-0.535746	90	230
1725	-0.4467	0.021417	-0.403867	-0.489533	11	-0.449461	-0.450589	0.001047	-0.379851	-0.512088	100	225
1730	-0.42133	0.022367	-0.376596	-0.466064	10	-0.428404	-0.42805	0.001094	-0.359114	-0.498525	90	220
1735	-0.396703	0.020849	-0.355004	-0.438402	11	-0.405189	-0.402296	0.001084	-0.344688	-0.478811	100	215
1740	-0.377492	0.019937	-0.337617	-0.417367	10	-0.390094	-0.385923	0.001008	-0.340711	-0.470726	90	210
1745	-0.364423	0.016061	-0.3323	-0.396545	11	-0.375817	-0.369234	0.000885	-0.338495	-0.456453	100	205
1750	-0.356336	0.012818	-0.330701	-0.381971	10	-0.368047	-0.36145	0.000775	-0.337799	-0.436518	90	200
1755	-0.355334	0.009529	-0.336276	-0.374391	11	-0.362768	-0.359428	0.000661	-0.335346	-0.422398	100	195
1760	-0.357705	0.00946	-0.338786	-0.376624	10	-0.361443	-0.359978	0.000555	-0.335154	-0.407387	90	190
1765	-0.359278	0.009245	-0.340789	-0.377767	11	-0.36094	-0.360361	0.0005	-0.335498	-0.393877	100	185
1770	-0.360137	0.010113	-0.33991	-0.380363	10	-0.361572	-0.361238	0.000474	-0.335068	-0.387723	90	180
1775	-0.361162	0.010275	-0.340612	-0.381713	11	-0.363117	-0.362586	0.000478	-0.336757	-0.390603	100	175
1780	-0.363733	0.011886	-0.339961	-0.387505	10	-0.365779	-0.365326	0.000455	-0.340165	-0.39321	90	170
1785	-0.367288	0.012019	-0.343249	-0.391327	11	-0.36845	-0.368057	0.000475	-0.340741	-0.396265	100	165
1790	-0.371276	0.013593	-0.34409	-0.398463	10	-0.370543	-0.369939	0.000504	-0.340386	-0.403124	90	160
1795	-0.375035	0.013382	-0.348271	-0.4018	11	-0.373501	-0.373407	0.000538	-0.342046	-0.376307	100	155
1800	-0.377886	0.014444	-0.348998	-0.406774	10	-0.374841	-0.373587	0.000569	-0.343555	-0.413511	90	150
1805	-0.379319	0.013815	-0.351689	-0.40695	11	-0.376594	-0.374992	0.000615	-0.343151	-0.417634	100	145
1810	-0.378007	0.014661	-0.348684	-0.407329	10	-0.375509	-0.373529	0.000617	-0.343317	-0.415835	90	140
1815	-0.373362	0.01353	-0.346302	-0.400422	11	-0.373993	-0.371626	0.000643	-0.341901	-0.417603	100	135
1820	-0.369451	0.014398	-0.340656	-0.398246	10	-0.371331	-0.369309	0.000644	-0.339277	-0.415314	90	130
1825	-0.367657	0.013917	-0.339823	-0.395491	11	-0.369035	-0.367459	0.000623	-0.336509	-0.410913	100	125
1830	-0.366439	0.014971	-0.336497	-0.396381	10	-0.365746	-0.365221	0.000594	-0.33411	-0.404756	90	120
1835	-0.363289	0.013973	-0.335343	-0.391235	11	-0.361695	-0.36166	0.000553	-0.330715	-0.397099	100	115
1840	-0.358228	0.014678	-0.328872	-0.387583	10	-0.356018	-0.356196	0.000525	-0.325196	-0.389805	90	110
1845	-0.351059	0.013648	-0.323762	-0.378356	11	-0.350069	-0.349532	0.000525	-0.320019	-0.384513	100	105
1850	-0.343082	0.014562	-0.313958	-0.372205	10	-0.342989	-0.34216	0.00052	-0.312856	-0.377009	90	100
1855	-0.334601	0.013861	-0.30688	-0.362322	11	-0.335324	-0.33435	0.000546	-0.303475	-0.370947	100	95
1860	-0.32667	0.014798	-0.297074	-0.356267	10	-0.327629	-0.32678	0.00057	-0.293336	-0.363459	90	90
1865	-0.319861	0.014191	-0.291479	-0.348242	11	-0.320828	-0.319985	0.000612	-0.282833	-0.359213	100	85
1870	-0.313793	0.015233	-0.283327	-0.34426	10	-0.31399	-0.313481	0.000625	-0.275022	-0.352276	90	80
1875	-0.308421	0.014475	-0.279471	-0.337371	11	-0.307283	-0.30426	0.000659	-0.292025	-0.344175	100	75
1880	-0.303423	0.015468	-0.272487	-0.334358	10	-0.299522	-0.3	0.000693	-0.25047	-0.338454	90	70
1885	-0.297685	0.014974	-0.267737	-0.327634	11	-0.292278	-0.294031	0.000728	-0.242234	-0.33104	100	65
1890	-0.290853	0.016346	-0.258161	-0.323546	10	-0.281768	-0.285146	0.000778	-0.224963	-0.321451	90	60
1895	-0.280979	0.01669	-0.2476	-0.314359	11	-0.271724	-0.268334	0.000823	-0.23197	-0.310033	100	55
1900	-0.264245	0.021329	-0.221587	-0.306903	10	-0.255332	-0.258292	0.000901	-0.19121	-0.301249	90	50
1905	-0.242634	0.022883	-0.196868	-0.2884	11	-0.239507	-0.231791	0.000982	-0.196259	-0.290518	100	45
1910	-0.220768	0.024151	-0.172466	-0.269071	10	-0.217541	-0.217159	0.001012	-0.154043	-0.28169	90	40
1915	-0.195231	0.021968	-0.151294	-0.239167	11	-0.196105	-0.195546	0.001017	-0.135835	-0.26038	100	35
1920	-0.168847	0.021952	-0.124944	-0.212751	10	-0.171127	-0.170592	0.000954	-0.113434	-0.230019	90	30
1925	-0.14188	0.020103	-0.101674	-0.182086	11	-0.144985	-0.144977	0.000916	-0.087156	-0.202529	100	25
1930	-0.115308	0.021439	-0.072431	-0.158185	10	-0.119681	-0.119632	0.000941	-0.062779	-0.178557	90	20
1935	-0.08994	0.021715	-0.046511	-0.133369	11	-0.094564	-0.094524	0.001001	-0.032185	-0.160638	100	15
1940	-0.065997	0.025288	-0.015421	-0.116574	10	-0.07226	-0.072257	0.001101	0.001257	-0.147094	90	10
1945	-0.044432	0.025308	0.006184	-0.095049	11	-0.050391	-0.050121	0.001155	0.017774	-0.125405	100	5
1950	-0.02328	0.025423	0.027566	-0.074125	10	-0.032121	-0.030546	0.001114	0.022639	-0.107288	90	0
1955	-0.006592	0.022604	0.038616	-0.051801	10	-0.016088	-0.012816	0.001048	0.034981	-0.089258	90	-5
1960	0.002777	0.02135	0.045477	-0.039923	10	-0.002554	-0.000848	0.001007	0.045768	-0.072298	90	-10
1965	0.011456	0.020512	0.05248	-0.029569	10	0.008743	0.009615	0.001013	0.065436	-0.054723	90	-15
1970	0.019251	0.020389	0.060029	-0.021526	10	0.018877	0.019003	0.00108	0.088132	-0.042241	90	-20
1975	0.026295	0.021092	0.068479	-0.015888	10	0.027899	0.029011	0.001194	0.110557	-0.046168	90	-25
1980	0.03274	0.022624	0.077988	-0.012508	10	0.03673	0.03736	0.001349	0.13245	-0.049976	90	-30
1985	0.038885	0.024857	0.088599	-0.010828	10	0.045398	0.04537	0.001531	0.154512	-0.058008	90	-35
1990	0.044974	0.027618	0.10021	-0.010262	10	0.05478	0.054262	0.001724	0.172926	-0.07088	90	-40
1995	0.051104	0.030772	0.112649	-0.01044	10	0.064926	0.064118	0.001928	0.190759	-0.08675	90	-45

## Sheet: D_Ljungq2010
YearAD	Reconstructed temperature
5	-0.065
15	-0.041
25	-0.094
35	-0.059
45	0.006
55	0.106
65	0.039
75	-0.026
85	0.054
95	-0.021
105	-0.023
115	-0.022
125	-0.044
135	0.007
145	0.023
155	0.064
165	0.114
175	0.08
185	0.05
195	-0.04
205	-0.077
215	-0.15
225	-0.043
235	-0.118
245	-0.094
255	-0.1
265	-0.231
275	-0.206
285	-0.216
295	-0.273
305	-0.288
315	-0.294
325	-0.407
335	-0.384
345	-0.391
355	-0.328
365	-0.207
375	-0.162
385	-0.28
395	-0.311
405	-0.269
415	-0.201
425	-0.233
435	-0.311
445	-0.228
455	-0.346
465	-0.437
475	-0.417
485	-0.195
495	-0.317
505	-0.367
515	-0.438
525	-0.321
535	-0.455
545	-0.471
555	-0.254
565	-0.262
575	-0.195
585	-0.128
595	-0.199
605	-0.182
615	-0.183
625	-0.275
635	-0.289
645	-0.296
655	-0.231
665	-0.194
675	-0.169
685	-0.281
695	-0.273
705	-0.364
715	-0.289
725	-0.298
735	-0.236
745	-0.221
755	-0.274
765	-0.242
775	-0.281
785	-0.223
795	-0.241
805	-0.253
815	-0.162
825	-0.144
835	-0.02
845	0.003
855	-0.021
865	-0.03
875	-0.027
885	-0.067
895	-0.034
905	-0.214
915	-0.119
925	-0.112
935	-0.024
945	0.016
955	0.196
965	0.172
975	0.048
985	0.035
995	-0.018
1005	0.016
1015	0.063
1025	0.106
1035	0.029
1045	-0.045
1055	-0.002
1065	0.006
1075	-0.059
1085	0.055
1095	-0.034
1105	-0.098
1115	-0.159
1125	-0.142
1135	-0.142
1145	-0.14
1155	-0.177
1165	-0.144
1175	-0.169
1185	-0.157
1195	-0.215
1205	-0.146
1215	-0.137
1225	-0.123
1235	-0.164
1245	-0.121
1255	-0.157
1265	-0.197
1275	-0.226
1285	-0.262
1295	-0.256
1305	-0.196
1315	-0.253
1325	-0.344
1335	-0.412
1345	-0.336
1355	-0.369
1365	-0.29
1375	-0.282
1385	-0.293
1395	-0.276
1405	-0.228
1415	-0.311
1425	-0.399
1435	-0.349
1445	-0.436
1455	-0.543
1465	-0.486
1475	-0.495
1485	-0.564
1495	-0.471
1505	-0.36
1515	-0.441
1525	-0.493
1535	-0.361
1545	-0.439
1555	-0.366
1565	-0.375
1575	-0.445
1585	-0.49
1595	-0.509
1605	-0.608
1615	-0.555
1625	-0.535
1635	-0.56
1645	-0.622
1655	-0.537
1665	-0.586
1675	-0.605
1685	-0.675
1695	-0.692
1705	-0.609
1715	-0.493
1725	-0.326
1735	-0.357
1745	-0.374
1755	-0.347
1765	-0.309
1775	-0.376
1785	-0.406
1795	-0.357
1805	-0.341
1815	-0.461
1825	-0.351
1835	-0.391
1845	-0.327
1855	-0.318
1865	-0.379
1875	-0.239
1885	-0.337
1895	-0.25
1905	-0.293
1915	-0.296
1925	-0.171
1935	0.004
1945	0.019
1955	0.037
1965	0.015
1975	-0.074
1985	0.082
1995	0.056

## Sheet: I_PollenRecon-NENC-100to70long
YearCE	PollenRecon-NENC-100to70long-40to50lat_mtwa_lwr_100	yfit025	yfit975	yfit50
-1050	0.127108	0.0667644	0.185856	0.127082
-1040	0.117151	0.0573459	0.177672	0.117574
-1030	0.108658	0.0488714	0.171854	0.108651
-1020	0.10156	0.0405421	0.165796	0.101165
-1010	0.0956598	0.0361904	0.159357	0.0959082
-1000	0.0907633	0.0324409	0.151564	0.0907656
-990	0.0866749	0.0314054	0.143936	0.0867986
-980	0.0834146	0.0297981	0.142568	0.0850118
-970	0.0809742	0.0270947	0.13865	0.0826438
-960	0.0788492	0.0253093	0.133822	0.0796757
-950	0.0765276	0.0240084	0.129559	0.0775801
-940	0.0734975	0.0222847	0.129513	0.0747228
-930	0.0690097	0.018981	0.123068	0.0709561
-920	0.0627646	0.011641	0.117678	0.0654177
-910	0.0559997	0.00458665	0.112115	0.0582481
-900	0.0500184	-0.000943845	0.105429	0.0519839
-890	0.0461244	-0.00407946	0.102432	0.0481201
-880	0.0453831	-0.00597698	0.105244	0.047232
-870	0.0471513	-0.00236575	0.107533	0.0489236
-860	0.0506362	-0.000485973	0.109242	0.051574
-850	0.055126	0.00355098	0.11431	0.0558914
-840	0.0599088	0.00557244	0.120406	0.0604825
-830	0.0644852	0.0100961	0.130418	0.0652163
-820	0.0700346	0.0124668	0.13754	0.0707767
-810	0.0764325	0.0180039	0.142417	0.0777901
-800	0.0831414	0.0248508	0.150321	0.0845835
-790	0.0896239	0.0322416	0.155112	0.091338
-780	0.0953012	0.041378	0.161816	0.0972832
-770	0.0992264	0.0470505	0.166393	0.101028
-760	0.101882	0.0516722	0.16757	0.103866
-750	0.104188	0.0544825	0.171926	0.106074
-740	0.107065	0.0579367	0.173283	0.108399
-730	0.111417	0.0638316	0.172763	0.112664
-720	0.116482	0.0662691	0.178346	0.11745
-710	0.120808	0.0690865	0.183359	0.121364
-700	0.123548	0.0705484	0.18383	0.125386
-690	0.123857	0.0712655	0.182705	0.125308
-680	0.120888	0.0672009	0.179015	0.122258
-670	0.115822	0.0593199	0.173039	0.11673
-660	0.110408	0.0532983	0.168055	0.11117
-650	0.104366	0.0449225	0.164028	0.104734
-640	0.0974131	0.0404055	0.155845	0.0972552
-630	0.0892678	0.0325464	0.149477	0.0886401
-620	0.0792958	0.0232585	0.142083	0.0782286
-610	0.0675767	0.0133335	0.130302	0.0669313
-600	0.0556323	0.00197806	0.118636	0.0549197
-590	0.0450082	-0.00685036	0.105097	0.0449187
-580	0.0372501	-0.0128176	0.0947328	0.0365739
-570	0.0333666	-0.0135997	0.0865393	0.0322575
-560	0.0322255	-0.0146215	0.0853666	0.031334
-550	0.0331206	-0.0114544	0.0850676	0.0321718
-540	0.0354256	-0.0125973	0.0844495	0.035047
-530	0.0385143	-0.00842889	0.0874771	0.0377111
-520	0.0418661	-0.00522666	0.0898	0.0405492
-510	0.0454444	-0.00346941	0.0911893	0.0438695
-500	0.0487965	-0.000254588	0.0944381	0.0476012
-490	0.0513943	0.00207517	0.0961082	0.0506229
-480	0.0527095	0.00477457	0.0989727	0.0520448
-470	0.0523299	0.0052941	0.0958156	0.052068
-460	0.0511793	0.00190863	0.0956775	0.050909
-450	0.0499523	0.000183204	0.0947473	0.0497808
-440	0.0491198	0.00206066	0.0938772	0.0493804
-430	0.0491529	-0.000390817	0.093735	0.0489712
-420	0.0504099	0.0014863	0.100476	0.0508197
-410	0.0507916	0.00162377	0.103576	0.0509746
-400	0.049822	-0.000760918	0.102562	0.0500243
-390	0.0481348	-0.000780088	0.0998683	0.0479691
-380	0.0463637	-0.00170319	0.097117	0.0466459
-370	0.0451496	0.000339757	0.0952842	0.0460826
-360	0.0456677	0.001976	0.0983878	0.0468285
-350	0.0476586	0.00223649	0.100525	0.0486772
-340	0.050004	0.00505495	0.101791	0.0510718
-330	0.0515856	0.0078969	0.102083	0.0524255
-320	0.0512853	0.00769203	0.100334	0.0512424
-310	0.0495703	0.00593847	0.0993095	0.0502523
-300	0.0483542	0.00509224	0.0970117	0.0489622
-290	0.0482721	0.00450193	0.096247	0.0494088
-280	0.0499554	0.00541813	0.100379	0.0517763
-270	0.0540356	0.00930327	0.105303	0.0555803
-260	0.0590519	0.013068	0.112204	0.060403
-250	0.0612772	0.0153458	0.115652	0.0624466
-240	0.0610403	0.0147508	0.113653	0.0622982
-230	0.0587941	0.0102301	0.110277	0.0600085
-220	0.0549911	0.00731056	0.107456	0.0556834
-210	0.050376	0.0032235	0.104235	0.0509256
-200	0.0459614	-0.00240734	0.102247	0.0469985
-190	0.0413791	-0.00757244	0.098638	0.0418192
-180	0.0361636	-0.0147017	0.0929037	0.0366128
-170	0.0298494	-0.0212603	0.0865861	0.0293928
-160	0.0225818	-0.028843	0.0775172	0.0220257
-150	0.0174502	-0.0350732	0.0721741	0.0173823
-140	0.014655	-0.0393588	0.0685398	0.0143672
-130	0.0138407	-0.0375429	0.0680724	0.0130738
-120	0.0146514	-0.0384981	0.0685501	0.0151077
-110	0.0166426	-0.0359015	0.0695691	0.0171948
-100	0.0187133	-0.0345352	0.0697799	0.0186093
-90	0.0209441	-0.032765	0.072796	0.0211792
-80	0.023737	-0.0297495	0.0764181	0.0238656
-70	0.0274945	-0.0232035	0.0811581	0.0277022
-60	0.0325592	-0.0171863	0.0833268	0.032822
-50	0.0375246	-0.0131731	0.0869904	0.0372225
-40	0.0415681	-0.00903068	0.0908015	0.0414779
-30	0.0445832	-0.00393303	0.0938788	0.0442707
-20	0.0464636	-0.005051	0.0958924	0.0463463
-10	0.0471071	-0.00395988	0.096988	0.0477666
0	0.0473744	-0.00395605	0.0965859	0.0483422
10	0.0479134	-0.00617174	0.0990671	0.0491211
20	0.0486428	-0.005481	0.100929	0.049555
30	0.0494812	-0.00363776	0.103108	0.0500776
40	0.0503474	-0.00326739	0.106506	0.0497179
50	0.0517843	-0.00423968	0.110622	0.0516177
60	0.0542955	-0.00322257	0.11396	0.0546501
70	0.0574052	-0.000877421	0.118839	0.0580326
80	0.0606331	0.00115203	0.121242	0.0615007
90	0.0634988	0.00351276	0.122151	0.0644238
100	0.0656526	0.00804235	0.122265	0.0672848
110	0.0674005	0.011277	0.123226	0.0686447
120	0.0692069	0.0168755	0.122991	0.0708454
130	0.0715335	0.0210649	0.124843	0.0727489
140	0.0748417	0.0278242	0.128958	0.0751149
150	0.0791117	0.0329937	0.129759	0.0796171
160	0.0827428	0.0372368	0.134504	0.0839418
170	0.0853837	0.0393328	0.136929	0.0861347
180	0.0868312	0.0400218	0.138422	0.0871827
190	0.0868823	0.0402525	0.136747	0.087151
200	0.0855169	0.0407956	0.132871	0.0853193
210	0.083787	0.0387112	0.130188	0.0841646
220	0.0819309	0.0384182	0.126385	0.0824217
230	0.0799919	0.0363712	0.12421	0.08033
240	0.0780135	0.032095	0.120187	0.0778554
250	0.0760634	0.0285909	0.120785	0.0754505
260	0.0745072	0.0251429	0.121768	0.0737765
270	0.0735231	0.0230735	0.122905	0.0726109
280	0.0731992	0.0212532	0.124924	0.072451
290	0.0736237	0.0193282	0.127641	0.0731595
300	0.0748691	0.0204908	0.128292	0.0743116
310	0.076393	0.0215009	0.131126	0.0762572
320	0.0777511	0.0203292	0.134048	0.0777369
330	0.0787482	0.0201013	0.135499	0.0785779
340	0.0791894	0.0229519	0.13625	0.0781565
350	0.0788814	0.0224381	0.135459	0.0781906
360	0.0785083	0.022366	0.136037	0.0778796
370	0.0786474	0.0242386	0.135251	0.0780949
380	0.0791563	0.0254194	0.135934	0.0785164
390	0.0798927	0.0282506	0.137065	0.0793713
400	0.0807144	0.0287023	0.137436	0.0807766
410	0.0810762	0.0272076	0.138845	0.0809237
420	0.0804915	0.0249177	0.139833	0.0805863
430	0.0792168	0.0231457	0.137878	0.0784681
440	0.0775145	0.0200352	0.136664	0.0768939
450	0.0756467	0.0183218	0.137527	0.075421
460	0.0731863	0.0158065	0.134264	0.0719596
470	0.0686132	0.00910145	0.130149	0.0676437
480	0.0618936	0.00339604	0.124932	0.0607307
490	0.0530656	-0.00653634	0.114875	0.0514188
500	0.0421672	-0.0178412	0.104175	0.0411918
510	0.0301901	-0.0280852	0.0955308	0.028987
520	0.020811	-0.0389258	0.0884995	0.0203927
530	0.0140403	-0.0445261	0.0837859	0.0135964
540	0.00947558	-0.0485989	0.0833058	0.00918444
550	0.00671483	-0.0543325	0.0808518	0.00686458
560	0.00532079	-0.0608103	0.0818189	0.00533326
570	0.00490303	-0.0607463	0.0818194	0.00433405
580	0.00570604	-0.0603825	0.0796406	0.00551512
590	0.00805805	-0.0563377	0.0780172	0.00746666
600	0.0122873	-0.0502508	0.0807948	0.0112487
610	0.0185484	-0.0427036	0.0879748	0.0172868
620	0.0244084	-0.0340316	0.0909854	0.0238086
630	0.0286016	-0.0291655	0.0961312	0.0280694
640	0.0306281	-0.0252963	0.0986531	0.0304236
650	0.029988	-0.0213793	0.0943227	0.0292778
660	0.0262386	-0.023903	0.0814497	0.0256244
670	0.0215454	-0.0264401	0.0711502	0.0213386
680	0.017005	-0.0305639	0.0671724	0.0166919
690	0.0123151	-0.0375558	0.0620612	0.0123909
700	0.0071736	-0.0432714	0.0562785	0.00666229
710	0.0012785	-0.053001	0.0529885	0.000367188
720	-0.0048521	-0.0617518	0.0499288	-0.00513534
730	-0.0103989	-0.0690687	0.0465801	-0.011526
740	-0.0151266	-0.0706423	0.041902	-0.0163106
750	-0.0188001	-0.0724344	0.0348727	-0.0205925
760	-0.0211839	-0.0702236	0.0284389	-0.0223022
770	-0.022181	-0.0689371	0.0260319	-0.0226261
780	-0.0220411	-0.0661661	0.0246222	-0.0222941
790	-0.0209829	-0.0648741	0.0233606	-0.0201275
800	-0.0192231	-0.0619527	0.0252841	-0.0185662
810	-0.0169786	-0.0590453	0.0268687	-0.01648
820	-0.0151227	-0.05527	0.0284585	-0.0147804
830	-0.015259	-0.0554734	0.028008	-0.0150753
840	-0.0170123	-0.0571992	0.0257376	-0.0172067
850	-0.0199071	-0.0593775	0.0222163	-0.0199454
860	-0.023468	-0.061468	0.0168532	-0.0236856
870	-0.0272306	-0.066361	0.0144394	-0.0266582
880	-0.030869	-0.0681373	0.0105853	-0.0305917
890	-0.0341474	-0.0711995	0.00680091	-0.0341384
900	-0.0368314	-0.0751513	0.0026418	-0.0365432
910	-0.0386865	-0.076976	6.05801e-05	-0.0387155
920	-0.0393608	-0.0810021	0.000587889	-0.0398852
930	-0.0379152	-0.0800208	0.0036433	-0.0388282
940	-0.0345282	-0.0761809	0.00620342	-0.035679
950	-0.029611	-0.0701578	0.0124809	-0.0306053
960	-0.0235746	-0.0647063	0.0185604	-0.0244218
970	-0.0169432	-0.059182	0.0257667	-0.0173293
980	-0.0120087	-0.0568196	0.0313601	-0.0121699
990	-0.00974663	-0.0554717	0.0329536	-0.00992053
1000	-0.0104323	-0.0560893	0.0322893	-0.0099857
1010	-0.014341	-0.0578268	0.0282075	-0.0138775
1020	-0.0217067	-0.0656068	0.0236799	-0.0212801
1030	-0.0301558	-0.0757092	0.016144	-0.0302335
1040	-0.038102	-0.0855726	0.00793879	-0.0382218
1050	-0.0454292	-0.091869	0.000843502	-0.0458911
1060	-0.0520211	-0.0976451	-0.00753935	-0.0519424
1070	-0.0577613	-0.101576	-0.0173194	-0.0576326
1080	-0.0630434	-0.107333	-0.0243761	-0.0634147
1090	-0.0679287	-0.11154	-0.0312013	-0.0683776
1100	-0.0717863	-0.115124	-0.0352839	-0.0723696
1110	-0.0739854	-0.118185	-0.035772	-0.0736486
1120	-0.0738951	-0.119832	-0.0335193	-0.0729485
1130	-0.0722066	-0.119168	-0.0316215	-0.0709034
1140	-0.0711056	-0.121706	-0.0289406	-0.0698206
1150	-0.0708971	-0.121612	-0.0266848	-0.0698345
1160	-0.0718478	-0.122746	-0.026483	-0.0708019
1170	-0.0742244	-0.125361	-0.0275307	-0.0733507
1180	-0.0775662	-0.130123	-0.0281833	-0.0772161
1190	-0.079827	-0.13348	-0.0274237	-0.0794303
1200	-0.0806884	-0.133309	-0.0272109	-0.0800368
1210	-0.0799556	-0.132673	-0.0249452	-0.0794134
1220	-0.0774339	-0.130408	-0.0229532	-0.0769831
1230	-0.0733561	-0.123472	-0.0196573	-0.0730722
1240	-0.0695931	-0.12015	-0.0176069	-0.0695423
1250	-0.0662219	-0.116622	-0.0170275	-0.0665806
1260	-0.0630468	-0.113572	-0.0157239	-0.0633774
1270	-0.0598722	-0.109668	-0.0146145	-0.0605263
1280	-0.056567	-0.10536	-0.0131726	-0.0574243
1290	-0.0535753	-0.102232	-0.0094714	-0.0547789
1300	-0.0510326	-0.0995597	-0.00592989	-0.0516816
1310	-0.0489524	-0.0988283	-0.00385305	-0.0499372
1320	-0.0473483	-0.0954281	-0.00293248	-0.0475386
1330	-0.0461622	-0.0944702	-0.00364554	-0.0463238
1340	-0.0441379	-0.0917948	-0.00147576	-0.0443595
1350	-0.0412967	-0.0901818	0.000793838	-0.0417788
1360	-0.0382781	-0.0870262	0.00388591	-0.0382475
1370	-0.035722	-0.0863794	0.00558853	-0.0362409
1380	-0.0342638	-0.0868103	0.00624881	-0.0345757
1390	-0.0339426	-0.0889201	0.00997206	-0.0349111
1400	-0.0342365	-0.0912087	0.0110838	-0.0352687
1410	-0.034734	-0.0903821	0.0111026	-0.0352939
1420	-0.035024	-0.0893185	0.009975	-0.0360925
1430	-0.034695	-0.087721	0.0090042	-0.0356297
1440	-0.0337326	-0.0859878	0.00991531	-0.0337083
1450	-0.0326071	-0.0851671	0.0114836	-0.0320495
1460	-0.0315806	-0.0854052	0.0134416	-0.0306034
1470	-0.0309154	-0.0857583	0.0128587	-0.0308919
1480	-0.0308733	-0.0852615	0.0112102	-0.0314263
1490	-0.031601	-0.0826766	0.00837649	-0.0322034
1500	-0.0327106	-0.0818002	0.00774966	-0.0336204
1510	-0.0336866	-0.0807865	0.00750307	-0.0335979
1520	-0.0340149	-0.0778003	0.00751677	-0.0339059
1530	-0.0331814	-0.0746443	0.00807248	-0.0323472
1540	-0.0312347	-0.0709321	0.00948428	-0.030687
1550	-0.0299016	-0.0688719	0.0122886	-0.0294314
1560	-0.0297976	-0.0686828	0.0109425	-0.0298894
1570	-0.0314281	-0.0708255	0.00819031	-0.0321668
1580	-0.0352984	-0.0770334	0.00773602	-0.036817
1590	-0.0414437	-0.0844635	0.0050982	-0.0430652
1600	-0.0475071	-0.0927983	0.00145429	-0.0494254
1610	-0.0527339	-0.09939	-0.00123799	-0.0545938
1620	-0.0567028	-0.104203	-0.00364139	-0.0581578
1630	-0.0589926	-0.10662	-0.00539722	-0.059849
1640	-0.059386	-0.105706	-0.00867891	-0.0600129
1650	-0.0595543	-0.106198	-0.00937616	-0.0608573
1660	-0.0597654	-0.105776	-0.0107985	-0.0610317
1670	-0.0597746	-0.106142	-0.0133789	-0.0612223
1680	-0.0593371	-0.105438	-0.0154701	-0.0609634
1690	-0.0582301	-0.10482	-0.0146541	-0.0598726
1700	-0.0568638	-0.102975	-0.0142256	-0.0578351
1710	-0.0556786	-0.101708	-0.013579	-0.0564344
1720	-0.0549406	-0.100958	-0.0123924	-0.0557392
1730	-0.0549157	-0.100383	-0.0126918	-0.055944
1740	-0.0558668	-0.100824	-0.0156836	-0.0565342
1750	-0.0573956	-0.101915	-0.0163912	-0.0578854
1760	-0.0586566	-0.103551	-0.0188651	-0.0591663
1770	-0.059027	-0.104533	-0.0182007	-0.0597283
1780	-0.0578841	-0.10406	-0.016252	-0.0585496
1790	-0.0546053	-0.100992	-0.0112248	-0.0549047
1800	-0.0494398	-0.0974437	-0.00424986	-0.0498326
1810	-0.0430015	-0.0935991	0.00441934	-0.0426052
1820	-0.0349217	-0.0849555	0.0157718	-0.0343224
1830	-0.024829	-0.0741563	0.0266755	-0.0241228
1840	-0.0123519	-0.0621572	0.0396619	-0.0118724
1850	0.00211124	-0.0502826	0.057244	0.00294497
1860	0.0170104	-0.0373023	0.0779811	0.0178383
1870	0.0320697	-0.0231459	0.0946261	0.032545
1880	0.0470585	-0.0103554	0.11081	0.0473192
1890	0.0617458	0.00176423	0.128926	0.0619492
1900	0.0759341	0.0137441	0.147366	0.0760613
1910	0.0895858	0.0253877	0.166464	0.0894132
1920	0.102652	0.0356086	0.184493	0.101939
1930	0.115078	0.0430081	0.201504	0.115016
1940	0.126809	0.0495233	0.218478	0.126625
1950	0.137584	0.0550613	0.23361	0.137978
1960	0.146379	0.0584371	0.246546	0.147312
1970	0.15355	0.0624569	0.260706	0.154325
1980	0.159677	0.0619806	0.279204	0.161291
1990	0.165342	0.048185	0.303829	0.168439
2000	0.171087	0.0358502	0.329255	0.17326
2010	0.176908	0.0219568	0.355465	0.178784

## Sheet: I-input_PollenRecon-NENC-100to7
PD34dID	Entity	YearCE	mtwa	weight	LatDD	LonDD	CalBP
1	2	1950	0.0971	0.0817757	46.05	-79.2	0
2	2	1883.33	0.2541	0.0576606	46.05	-79.2	66.67
3	2	1672.85	0.0971	0.0945946	46.05	-79.2	277.15
4	2	1495.69	0.0401	0.102339	46.05	-79.2	454.31
5	2	1318.54	0.1401	0.0806452	46.05	-79.2	631.46
6	2	964.23	-0.1169	0.135135	46.05	-79.2	985.77
7	2	609.92	-0.0169	0.0972222	46.05	-79.2	1340.08
8	2	432.77	0.1261	0.0911458	46.05	-79.2	1517.23
9	2	78.46	-0.1319	0.131579	46.05	-79.2	1871.54
10	2	-275.85	0.2541	0.0806452	46.05	-79.2	2225.85
11	2	-630.16	-0.2029	0.11745	46.05	-79.2	2580.16
12	2	-984.46	-0.1889	0.0951087	46.05	-79.2	2934.46
71	5	1950	-0.1366	0.0444162	47.88	-84.87	0
72	5	1925	0.1924	0.031617	47.88	-84.87	25
73	5	1900	-0.2366	0.0417163	47.88	-84.87	50
74	5	1875	-0.3366	0.0491573	47.88	-84.87	75
75	5	1850	-0.1936	0.0305144	47.88	-84.87	100
76	5	1693.56	0.0354	0.0472973	47.88	-84.87	256.44
77	5	1615.35	-0.2506	0.0422705	47.88	-84.87	334.65
78	5	1380.69	0.1494	0.0347913	47.88	-84.87	569.31
79	5	1067.82	0.0784	0.0368421	47.88	-84.87	882.18
80	5	911.39	0.1784	0.0310835	47.88	-84.87	1038.61
81	5	754.95	0.0354	0.0380849	47.88	-84.87	1195.05
82	5	442.08	0.1924	0.0309461	47.88	-84.87	1507.92
83	5	129.21	-0.0216	0.0419664	47.88	-84.87	1820.79
84	5	-27.22	-0.3366	0.0491573	47.88	-84.87	1977.22
85	5	-183.66	-0.0506	0.0435323	47.88	-84.87	2133.66
86	5	-340.09	-0.0646	0.044586	47.88	-84.87	2290.09
87	5	-496.53	-0.1366	0.049435	47.88	-84.87	2446.53
88	5	-652.96	0.1924	0.0370763	47.88	-84.87	2602.96
89	5	-809.4	-0.0506	0.0441362	47.88	-84.87	2759.4
90	5	-965.83	0.0494	0.0338491	47.88	-84.87	2915.83
91	5	-1122.27	-0.1366	0.0444162	47.88	-84.87	3072.27
92	5	-1278.71	-0.2216	0.0514706	47.88	-84.87	3228.71
141	7	1950	-0.0841	0.053681	42.25	-78.88	0
142	7	1950	0.2299	0.0738397	42.25	-78.88	0
143	7	1931.71	0.5159	0.0466667	42.25	-78.88	18.29
144	7	1901.21	0.2299	0.06917	42.25	-78.88	48.79
145	7	1870.72	0.4879	0.0501433	42.25	-78.88	79.28
146	7	1840.23	0.0299	0.0380022	42.25	-78.88	109.77
147	7	1809.74	0.4589	0.0344488	42.25	-78.88	140.26
148	7	1779.25	0.2019	0.0347222	42.25	-78.88	170.75
149	7	1749.15	0.6449	0.0402762	42.25	-78.88	200.85
150	7	1719.05	0.2019	0.0338491	42.25	-78.88	230.95
151	7	1688.95	0.1729	0.0348953	42.25	-78.88	261.05
152	7	1658.85	0.2019	0.0338491	42.25	-78.88	291.15
153	7	1538.44	0.1729	0.0348953	42.25	-78.88	411.56
154	7	1387.93	-0.1551	0.0366492	42.25	-78.88	562.07
155	7	1237.43	-0.4701	0.047043	42.25	-78.88	712.57
156	7	1086.92	-0.2411	0.0403226	42.25	-78.88	863.08
157	7	936.42	-0.2551	0.0427873	42.25	-78.88	1013.58
158	7	785.91	0.1299	0.03156	42.25	-78.88	1164.09
159	7	635.4	-0.1121	0.0362319	42.25	-78.88	1314.6
160	7	484.9	0.0299	0.0321396	42.25	-78.88	1465.1
161	7	334.39	0.3019	0.036157	42.25	-78.88	1615.61
162	7	183.88	-0.3841	0.0478796	42.25	-78.88	1766.12
163	7	-779.35	-0.2411	0.0482759	42.25	-78.88	2729.35
164	7	-869.66	0.2299	0.0365726	42.25	-78.88	2819.66
165	7	-1020.16	-0.2271	0.0479452	42.25	-78.88	2970.16
166	7	-1170.67	-0.3121	0.0459921	42.25	-78.88	3120.67
298	10	1950	0.1559	0.0428922	45.54	-73.31	0
299	10	1655.27	-0.3871	0.0461741	45.54	-73.31	294.73
300	10	1360.54	-0.1731	0.0424757	45.54	-73.31	589.46
301	10	1065.82	-0.3581	0.0428397	45.54	-73.31	884.18
302	10	830.03	0.1129	0.0387168	45.54	-73.31	1119.97
303	10	476.36	0.3419	0.0415184	45.54	-73.31	1473.64
304	10	181.63	-0.2011	0.0434243	45.54	-73.31	1768.37
305	10	-113.1	-0.1731	0.0424757	45.54	-73.31	2063.1
306	10	-407.82	0.4269	0.0385463	45.54	-73.31	2357.82
307	10	-702.55	0.0839	0.039019	45.54	-73.31	2652.55
308	10	-997.28	0.3269	0.0407925	45.54	-73.31	2947.28
309	10	-1292.01	0.1839	0.0449871	45.54	-73.31	3242.01
374	12	1950	-0.476	0.0381679	47.48	-70.68	0
375	12	1850	-0.947	0.0294613	47.48	-70.68	100
376	12	1079.07	-0.362	0.041816	47.48	-70.68	870.93
377	12	82.07	0.195	0.0480769	47.48	-70.68	1867.93
378	12	-904.11	0.167	0.0492264	47.48	-70.68	2854.11
431	13	1950	0.088	0.0516224	42.5	-74.6	0
432	13	1870	0.431	0.0490884	42.5	-74.6	80
433	13	1790	0.045	0.0548589	42.5	-74.6	160
434	13	1724.47	0.26	0.0649351	42.5	-74.6	225.53
435	13	1673.41	-0.083	0.0464807	42.5	-74.6	276.59
436	13	1622.34	0.26	0.0649351	42.5	-74.6	327.66
437	13	1571.28	0.174	0.0467914	42.5	-74.6	378.72
438	13	1520.22	0.26	0.0408879	42.5	-74.6	429.78
439	13	1469.16	-0.083	0.0464807	42.5	-74.6	480.84
440	13	1418.09	0.217	0.037797	42.5	-74.6	531.91
441	13	1367.03	-0.026	0.0432099	42.5	-74.6	582.97
442	13	1251.71	0.374	0.0393701	42.5	-74.6	698.29
443	13	1136.39	0.102	0.034965	42.5	-74.6	813.61
444	13	1021.08	0.002	0.0395034	42.5	-74.6	928.92
445	13	905.76	0.088	0.0516224	42.5	-74.6	1044.24
446	13	790.44	0.56	0.0434783	42.5	-74.6	1159.56
447	13	675.12	0.302	0.0614035	42.5	-74.6	1274.88
448	13	559.8	-0.083	0.0464807	42.5	-74.6	1390.2
449	13	444.49	0.317	0.0340136	42.5	-74.6	1505.51
450	13	329.17	-1.169	0.0127831	42.5	-74.6	1620.83
451	13	213.85	0.117	0.0498575	42.5	-74.6	1736.15
452	13	112.37	-1.098	0.0125583	42.5	-74.6	1837.63
453	13	10.9	-0.398	0.0516224	42.5	-74.6	1939.1
454	13	-90.58	-0.169	0.0396376	42.5	-74.6	2040.58
455	13	-192.05	-0.083	0.0464807	42.5	-74.6	2142.05
456	13	-293.53	0.102	0.034965	42.5	-74.6	2243.53
457	13	-395.01	-0.026	0.0432099	42.5	-74.6	2345.01
458	13	-496.48	-0.155	0.0478142	42.5	-74.6	2446.48
459	13	-597.96	-0.183	0.05	42.5	-74.6	2547.96
460	13	-699.43	0.345	0.037234	42.5	-74.6	2649.43
461	13	-800.91	0.102	0.0504323	42.5	-74.6	2750.91
462	13	-1027.67	-0.026	0.0576606	42.5	-74.6	2977.67
463	13	-1254.43	0.074	0.0356415	42.5	-74.6	3204.43
520	15	1960	0.8452	0.0459318	44.47	-70.05	-10
521	15	1950	0.4592	0.0388457	44.47	-70.05	0
522	15	1940	0.6022	0.0434783	44.47	-70.05	10
523	15	1930	0.7022	0.0616197	44.47	-70.05	20
524	15	1920	0.3452	0.0351053	44.47	-70.05	30
525	15	1910	0.5592	0.0397276	44.47	-70.05	40
526	15	1900	0.6882	0.0466667	44.47	-70.05	50
527	15	1890	0.6882	0.0466667	44.47	-70.05	60
528	15	1880	0.5022	0.0544323	44.47	-70.05	70
529	15	1870	0.1022	0.0396376	44.47	-70.05	80
530	15	1860	0.7452	0.059322	44.47	-70.05	90
531	15	1850	0.6742	0.0603448	44.47	-70.05	100
532	15	1840	0.2162	0.056	44.47	-70.05	110
533	15	1830	0.1022	0.0603448	44.47	-70.05	120
534	15	1820	0.4162	0.0584307	44.47	-70.05	130
535	15	1810	0.4592	0.0961538	44.47	-70.05	140
536	15	1800	0.3022	0.0586265	44.47	-70.05	150
537	15	1790	-0.0118	0.0461741	44.47	-70.05	160
538	15	1780	0.7742	0.131579	44.47	-70.05	170
539	15	1760	0.2452	0.0534351	44.47	-70.05	190
540	15	1720	0.0312	0.0726141	44.47	-70.05	230
541	15	1680	0.3022	0.0694444	44.47	-70.05	270
542	15	1640	-0.1258	0.0617284	44.47	-70.05	310
543	15	1600	-0.0408	0.0802752	44.47	-70.05	350
544	15	1560	-0.3978	0.0636364	44.47	-70.05	390
545	15	1520	-0.1978	0.124113	44.47	-70.05	430
546	15	1480	-0.5118	0.106383	44.47	-70.05	470
547	15	1440	-0.1838	0.131579	44.47	-70.05	510
548	15	1400	-0.2258	0.301724	44.47	-70.05	550
549	15	1360	-0.0838	0.0720165	44.47	-70.05	590
550	15	1330	-0.0118	0.0782998	44.47	-70.05	620
551	15	1320	-0.0838	0.0827423	44.47	-70.05	630
552	15	1280	-0.0118	0.0782998	44.47	-70.05	670
553	15	1240	-0.3118	0.164319	44.47	-70.05	710
554	15	1200	-0.1118	0.0806452	44.47	-70.05	750
555	15	1160	0.1162	0.0652985	44.47	-70.05	790
556	15	1120	-0.0548	0.0883838	44.47	-70.05	830
557	15	1080	-0.1548	0.0883838	44.47	-70.05	870
558	15	1040	0.1452	0.0630631	44.47	-70.05	910
559	15	1000	-0.0408	0.0674374	44.47	-70.05	950
560	15	960	0.2312	0.0631769	44.47	-70.05	990
561	15	920	-0.2548	0.181347	44.47	-70.05	1030
562	15	880	-0.1408	0.0994318	44.47	-70.05	1070
563	15	840	0.2022	0.0651769	44.47	-70.05	1110
564	15	800	0.2742	0.0507246	44.47	-70.05	1150
565	15	760	-0.0688	0.0870647	44.47	-70.05	1190
566	15	720	-0.1978	0.0630631	44.47	-70.05	1230
567	15	680	0.3312	0.037037	44.47	-70.05	1270
568	15	640	0.4882	0.0327409	44.47	-70.05	1310
569	15	600	0.1742	0.053681	44.47	-70.05	1350
570	15	560	-0.1118	0.0806452	44.47	-70.05	1390
571	15	520	0.2882	0.035824	44.47	-70.05	1430
572	15	480	0.3592	0.0455729	44.47	-70.05	1470
573	15	440	-0.1408	0.0815851	44.47	-70.05	1510
574	15	400	0.3592	0.0468541	44.47	-70.05	1550
575	15	370	0.1592	0.0548589	44.47	-70.05	1580
663	18	1912.59	-0.1219	0.0606586	42.25	-77.92	37.41
664	18	1897.63	-0.0079	0.0566343	42.25	-77.92	52.37
665	18	1875.19	0.2491	0.0945946	42.25	-77.92	74.81
666	18	1860.22	-0.0369	0.0564516	42.25	-77.92	89.78
667	18	1778.02	0.2491	0.0945946	42.25	-77.92	171.98
668	18	1541.42	-0.1509	0.0590219	42.25	-77.92	408.58
669	18	1267.38	0.1061	0.0435866	42.25	-77.92	682.62
670	18	955.88	0.1351	0.0405562	42.25	-77.92	994.12
671	18	644.4	-0.3079	0.0428397	42.25	-77.92	1305.6
672	18	332.9	0.0781	0.0368034	42.25	-77.92	1617.1
673	18	21.42	-0.2079	0.0458716	42.25	-77.92	1928.58
674	18	-290.08	0.1351	0.037155	42.25	-77.92	2240.08
675	18	-601.56	0.1201	0.0374332	42.25	-77.92	2551.56
676	18	-913.06	0.0921	0.0365726	42.25	-77.92	2863.06
677	18	-1224.54	0.0201	0.0416171	42.25	-77.92	3174.54
709	19	1890	-0.0503	0.0341463	46.28	-70.6	60
710	19	1850	-0.3073	0.0481431	46.28	-70.6	100
711	19	1401.72	0.0217	0.111465	46.28	-70.6	548.28
712	19	953.45	-0.5353	0.0348259	46.28	-70.6	996.55
713	19	505.17	0.0067	0.059322	46.28	-70.6	1444.83
714	19	56.9	-0.0213	0.0440806	46.28	-70.6	1893.1
715	19	-391.38	0.0787	0.0574713	46.28	-70.6	2341.38
716	19	-839.66	0.4497	0.0594228	46.28	-70.6	2789.66
717	19	-1287.93	0.7217	0.0380849	46.28	-70.6	3237.93
769	21	1896.43	-0.23	0.0358974	42.5	-73.32	53.57
770	21	1842.86	0.427	0.0424242	42.5	-73.32	107.14
771	21	1647.25	0.027	0.0424242	42.5	-73.32	302.75
772	21	1388.75	0.184	0.0329567	42.5	-73.32	561.25
773	21	1153.75	-0.33	0.0358974	42.5	-73.32	796.25
774	21	989.25	-0.116	0.0370763	42.5	-73.32	960.75
775	21	824.75	0.613	0.0277778	42.5	-73.32	1125.25
776	21	533.44	-0.202	0.0334608	42.5	-73.32	1416.56
777	21	157.68	0.241	0.0260223	42.5	-73.32	1792.32
778	21	-218.09	-0.187	0.0343137	42.5	-73.32	2168.09
779	21	-706.59	-0.23	0.0343137	42.5	-73.32	2656.59
780	21	-1105.39	-0.073	0.0359343	42.5	-73.32	3055.39
830	23	1950	-0.8474	0.0426309	46.28	-94.58	0
831	23	1923.09	-0.1184	0.0568182	46.28	-94.58	26.91
832	23	1882.72	-0.0904	0.0503597	46.28	-94.58	67.28
833	23	1855.81	-0.5334	0.0335249	46.28	-94.58	94.19
834	23	1815.45	-0.2474	0.0516224	46.28	-94.58	134.55
835	23	1788.54	-0.7044	0.479452	46.28	-94.58	161.46
836	23	1748.17	-0.7044	0.233333	46.28	-94.58	201.83
837	23	1721.26	-0.6474	0.0543478	46.28	-94.58	228.74
838	23	1680.9	-0.6474	0.0543478	46.28	-94.58	269.1
839	23	1653.99	-0.1184	0.0517751	46.28	-94.58	296.01
840	23	1586.47	-0.5904	0.0467914	46.28	-94.58	363.53
841	23	1537.84	-0.1474	0.0499287	46.28	-94.58	412.16
842	23	1464.89	-0.5184	0.0329877	46.28	-94.58	485.11
843	23	1416.26	-0.4184	0.039818	46.28	-94.58	533.74
844	23	1391.94	0.1956	0.0461133	46.28	-94.58	558.06
845	23	1367.63	0.0816	0.0511696	46.28	-94.58	582.37
846	23	1343.31	0.0956	0.0524738	46.28	-94.58	606.69
847	23	1294.68	0.0956	0.0524738	46.28	-94.58	655.32
848	23	1221.73	-0.1334	0.0548589	46.28	-94.58	728.27
849	23	1173.1	-0.1614	0.0592217	46.28	-94.58	776.9
850	23	1100.16	0.0526	0.0671785	46.28	-94.58	849.84
851	23	1051.52	-0.0474	0.0590219	46.28	-94.58	898.48
852	23	978.58	0.1666	0.0855746	46.28	-94.58	971.42
853	23	929.95	0.0526	0.0488145	46.28	-94.58	1020.05
854	23	857	0.1386	0.0641026	46.28	-94.58	1093
855	23	808.37	0.2956	0.057947	46.28	-94.58	1141.63
856	23	735.42	0.3666	0.052161	46.28	-94.58	1214.58
857	23	640.99	0.0096	0.0451031	46.28	-94.58	1309.01
858	23	546.57	0.1236	0.0441919	46.28	-94.58	1403.43
859	23	452.14	-0.1474	0.0493653	46.28	-94.58	1497.86
860	23	357.72	0.4816	0.0561798	46.28	-94.58	1592.28
861	23	263.29	0.3386	0.0434243	46.28	-94.58	1686.71
862	23	74.44	0.1666	0.0601375	46.28	-94.58	1875.56
863	23	-208.84	0.3666	0.0512445	46.28	-94.58	2158.84
864	23	-358.23	-0.0044	0.053681	46.28	-94.58	2308.23
865	23	-511.51	0.5526	0.0531108	46.28	-94.58	2461.51
866	23	-715.87	0.5816	0.0938338	46.28	-94.58	2665.87
867	23	-920.24	0.1236	0.0412736	46.28	-94.58	2870.24
868	23	-1124.61	1.0386	0.0356415	46.28	-94.58	3074.61
907	24	1930	0.0978	0.0443599	47.9	-84.87	20
908	24	1852.61	-0.0882	0.0525526	47.9	-84.87	97.39
909	24	1788.12	0.0838	0.044586	47.9	-84.87	161.88
910	24	1723.63	-0.1162	0.0439147	47.9	-84.87	226.37
911	24	1659.14	-0.2312	0.0388889	47.9	-84.87	290.86
912	24	1530.16	-0.0022	0.0502152	47.9	-84.87	419.84
913	24	1401.18	0.1118	0.0374732	47.9	-84.87	548.82
914	24	1143.22	-0.0882	0.0525526	47.9	-84.87	806.78
915	24	885.27	-0.1022	0.0422705	47.9	-84.87	1064.73
916	24	627.31	0.0838	0.044586	47.9	-84.87	1322.69
917	24	369.35	-0.0882	0.0525526	47.9	-84.87	1580.65
918	24	111.39	0.0838	0.044586	47.9	-84.87	1838.61
919	24	-82.08	0.3838	0.0308914	47.9	-84.87	2032.08
920	24	-340.04	0.0978	0.0435323	47.9	-84.87	2290.04
921	24	-598	0.0688	0.0456323	47.9	-84.87	2548
922	24	-855.96	-0.2022	0.0451031	47.9	-84.87	2805.96
923	24	-1113.92	0.3548	0.0324675	47.9	-84.87	3063.92
989	26	1950	0.153	0.07431	43.08	-89.87	0
990	26	1788.5	-0.005	0.0508721	43.08	-89.87	161.5
991	26	558.41	0.638	0.0316742	43.08	-89.87	1391.59
992	26	-56.63	-0.376	0.047749	43.08	-89.87	2006.63
993	26	-671.68	-0.262	0.0609756	43.08	-89.87	2621.68
994	26	-1102.21	-0.19	0.0395928	43.08	-89.87	3052.21
1027	27	1947.5	-0.3581	0.037797	47.18	-95.17	2.5
1028	27	1925	-0.4151	0.0324374	47.18	-95.17	25
1029	27	1900	-0.5291	0.0322284	47.18	-95.17	50
1030	27	1875	0.0279	0.0545171	47.18	-95.17	75
1031	27	1850	-0.7581	0.0408401	47.18	-95.17	100
1032	27	1722.82	-1.0011	0.0451031	47.18	-95.17	227.18
1033	27	1595.64	-0.1011	0.0410798	47.18	-95.17	354.36
1034	27	1468.46	-0.1011	0.0410798	47.18	-95.17	481.54
1035	27	1086.93	0.0559	0.0476839	47.18	-95.17	863.07
1036	27	832.57	0.3559	0.0440806	47.18	-95.17	1117.43
1037	27	578.21	0.2559	0.0498575	47.18	-95.17	1371.79
1038	27	323.85	-0.4151	0.0360082	47.18	-95.17	1626.15
1039	27	69.49	-0.1151	0.0630631	47.18	-95.17	1880.51
1040	27	-184.87	0.2129	0.0502874	47.18	-95.17	2134.87
1041	27	-312.04	-0.0721	0.421687	47.18	-95.17	2262.04
1042	27	-439.22	0.2989	0.0362694	47.18	-95.17	2389.22
1043	27	-693.58	0.2279	0.0373932	47.18	-95.17	2643.58
1044	27	-820.76	0.4709	0.0496454	47.18	-95.17	2770.76
1045	27	-933.5	-0.0721	0.546875	47.18	-95.17	2883.5
1046	27	-1130.1	0.1419	0.0654206	47.18	-95.17	3080.1
1184	32	1950	-0.6725	0.0373134	45.57	-70.68	0
1185	32	1890	-0.7865	0.0788288	45.57	-70.68	60
1186	32	1830	-1.0005	0.05	45.57	-70.68	120
1187	32	1686.73	-0.4585	0.0508721	45.57	-70.68	263.27
1188	32	1460.18	-0.0865	0.0772627	45.57	-70.68	489.82
1189	32	1392.21	-0.2005	0.0496454	45.57	-70.68	557.79
1190	32	1346.9	-0.0295	0.0623886	45.57	-70.68	603.1
1191	32	1120.36	-0.2295	0.0574713	45.57	-70.68	829.64
1192	32	893.81	0.1275	0.0813953	45.57	-70.68	1056.19
1193	32	667.26	0.2705	0.0964187	45.57	-70.68	1282.74
1194	32	553.99	-0.1155	0.0662879	45.57	-70.68	1396.01
1195	32	440.71	0.0275	0.0732218	45.57	-70.68	1509.29
1196	32	395.4	0.0135	0.0651769	45.57	-70.68	1554.6
1197	32	214.16	0.1995	0.101449	45.57	-70.68	1735.84
1198	32	-12.38	0.1705	0.0985915	45.57	-70.68	1962.38
1199	32	-238.93	0.2275	0.0928382	45.57	-70.68	2188.93
1200	32	-465.48	0.1135	0.0806452	45.57	-70.68	2415.48
1201	32	-692.03	-0.0005	0.0738397	45.57	-70.68	2642.03
1202	32	-918.58	-0.0295	0.061296	45.57	-70.68	2868.58
1203	32	-1145.13	-0.1865	0.056	45.57	-70.68	3095.13
1240	33	1895.67	-1.3406	0.0219849	43.92	-74.68	54.33
1241	33	1861.33	-0.4836	0.0290216	43.92	-74.68	88.67
1242	33	1728.56	-0.7976	0.039019	43.92	-74.68	221.44
1243	33	1547.31	-1.7686	0.0161588	43.92	-74.68	402.69
1244	33	1366.06	-0.1256	0.301724	43.92	-74.68	583.94
1245	33	1184.81	-0.2686	0.102941	43.92	-74.68	765.19
1246	33	1003.56	-0.6546	0.0376344	43.92	-74.68	946.44
1247	33	822.31	-1.1406	0.0153711	43.92	-74.68	1127.69
1248	33	459.81	0.4744	0.034965	43.92	-74.68	1490.19
1249	33	97.3	1.3744	0.057947	43.92	-74.68	1852.7
1250	33	-265.2	1.0744	0.052161	43.92	-74.68	2215.2
1251	33	-627.7	1.0164	0.0643382	43.92	-74.68	2577.7
1252	33	-990.2	0.8164	0.0465426	43.92	-74.68	2940.2
1316	35	1950	-0.4287	0.0686275	44.37	-72.15	0
1317	35	1651.42	-0.0287	0.115894	44.37	-72.15	298.58
1318	35	1367.98	-0.0567	0.108025	44.37	-72.15	582.02
1319	35	912.03	-0.1147	0.0483425	44.37	-72.15	1037.97
1320	35	343.32	-0.0857	0.0386313	44.37	-72.15	1606.68
1321	35	-225.39	0.3573	0.0591216	44.37	-72.15	2175.39
1322	35	-794.1	-0.0717	0.0855746	44.37	-72.15	2744.1
1339	36	1420.75	0.0476	0.0299914	42.6	-73.57	529.25
1340	36	1264.01	0.2906	0.0443038	42.6	-73.57	685.99
1341	36	970.13	0.2906	0.0443038	42.6	-73.57	979.87
1342	36	676.25	-0.1384	0.0259451	42.6	-73.57	1273.75
1343	36	284.41	-0.4524	0.0247001	42.6	-73.57	1665.59
1344	36	-9.48	-0.4524	0.0247001	42.6	-73.57	1959.48
1345	36	-303.36	0.0906	0.0357143	42.6	-73.57	2253.36
1346	36	-695.2	0.0906	0.0303556	42.6	-73.57	2645.2
1347	36	-989.08	0.2336	0.0303293	42.6	-73.57	2939.08
1348	36	-1264.53	0.7756	0.0394144	42.6	-73.57	3214.53
1550	39	1950	0.01	0.108025	46.67	-88.02	0
1551	39	1830	0.025	0.0829384	46.67	-88.02	120
1552	39	1696.03	-0.004	0.0839329	46.67	-88.02	253.97
1553	39	1472.74	-0.004	0.0839329	46.67	-88.02	477.26
1554	39	1249.46	-0.247	0.202312	46.67	-88.02	700.54
1555	39	1026.18	-0.061	0.10355	46.67	-88.02	923.82
1556	39	809.09	-0.232	0.101449	46.67	-88.02	1140.91
1557	39	593.18	0.182	0.055205	46.67	-88.02	1356.82
1558	39	377.28	0.082	0.0859951	46.67	-88.02	1572.72
1559	39	161.37	-0.032	0.116279	46.67	-88.02	1788.63
1560	39	4.82	-0.147	0.107034	46.67	-88.02	1945.18
1561	39	-140.43	-0.175	0.166667	46.67	-88.02	2090.43
1562	39	-285.68	-0.161	0.0964187	46.67	-88.02	2235.68
1563	39	-430.93	0.039	0.0845411	46.67	-88.02	2380.93
1564	39	-434.81	0.082	0.0892857	46.67	-88.02	2384.81
1565	39	-411.76	0.282	0.056	46.67	-88.02	2361.76
1566	39	-388.71	0.396	0.0665399	46.67	-88.02	2338.71
1587	40	1962.29	0.0075	0.0415677	41.7	-71.78	-12.29
1588	40	1916	-0.1215	0.121951	41.7	-71.78	34
1589	40	1885.14	-0.9645	0.0307557	41.7	-71.78	64.86
1590	40	1838.86	-0.5215	0.0605536	41.7	-71.78	111.14
1591	40	1808	0.0785	0.0711382	41.7	-71.78	142
1592	40	1777.14	0.0645	0.0727651	41.7	-71.78	172.86
1593	40	1746.29	-0.1645	0.0601375	41.7	-71.78	203.71
1594	40	1715.43	-0.1645	0.0601375	41.7	-71.78	234.57
1595	40	1700	0.0215	0.0661626	41.7	-71.78	250
1596	40	1646.98	-0.2075	0.0581395	41.7	-71.78	303.02
1597	40	1554.21	0.1505	0.0504323	41.7	-71.78	395.79
1598	40	1527.7	-0.1645	0.0601375	41.7	-71.78	422.3
1599	40	1448.18	0.0645	0.0452196	41.7	-71.78	501.82
1600	40	1395.16	-0.1785	0.0590219	41.7	-71.78	554.84
1601	40	1342.15	0.2505	0.0464807	41.7	-71.78	607.85
1602	40	1289.13	0.0645	0.0452196	41.7	-71.78	660.87
1603	40	1236.12	0.1785	0.0435866	41.7	-71.78	713.88
1604	40	1183.1	-0.2215	0.0574713	41.7	-71.78	766.9
1605	40	1130.09	-0.0075	0.0614035	41.7	-71.78	819.91
1606	40	1077.07	-0.0215	0.0535168	41.7	-71.78	872.93
1607	40	1024.05	0.2215	0.0714286	41.7	-71.78	925.95
1608	40	918.02	0.1785	0.0767544	41.7	-71.78	1031.98
1648	42	1910	-0.328	0.0603448	46.61	-73	40
1649	42	1681.28	-0.2	0.0813953	46.61	-73	268.72
1650	42	837.67	-0.157	0.0859951	46.61	-73	1112.33
1651	42	-5.94	0.4	0.0485437	46.61	-73	1955.94
1652	42	-736.85	-0.243	0.0428397	46.61	-73	2686.85
1653	42	-1016.92	0.2	0.0519288	46.61	-73	2966.92
1654	42	-1297	-0.228	0.0733753	46.61	-73	3247
1696	43	1950	-1.8535	0.0360082	41.33	-74.67	0
1697	43	1602.08	-0.1965	0.0296862	41.33	-74.67	347.92
1698	43	1254.16	0.6895	0.0451031	41.33	-74.67	695.84
1700	43	-160.72	-0.7965	0.0376344	41.33	-74.67	2110.72
1701	43	-879.76	0.3035	0.0340798	41.33	-74.67	2829.76
1718	44	1294.61	-0.4598	0.0434243	43.12	-83.24	655.39
1719	44	1226.33	-0.2878	0.0347222	43.12	-83.24	723.67
1720	44	1089.78	-1.1168	0.0327409	43.12	-83.24	860.22
1721	44	953.24	-1.5448	0.0892857	43.12	-83.24	996.76
1722	44	816.69	-1.5598	0.0904393	43.12	-83.24	1133.31
1723	44	748.41	0.1122	0.0443038	43.12	-83.24	1201.59
1724	44	680.14	0.1972	0.0431034	43.12	-83.24	1269.86
1725	44	543.59	0.2972	0.036157	43.12	-83.24	1406.41
1726	44	407.04	0.0122	0.0376344	43.12	-83.24	1542.96
1727	44	270.49	-0.0738	0.0385039	43.12	-83.24	1679.51
1728	44	133.95	0.4262	0.0438596	43.12	-83.24	1816.05
1729	44	-2.6	0.6692	0.0636364	43.12	-83.24	1952.6
1730	44	-139.15	0.7552	0.0636364	43.12	-83.24	2089.15
1731	44	-275.7	0.6122	0.0405093	43.12	-83.24	2225.7
1732	44	-412.25	0.3552	0.0577558	43.12	-83.24	2362.25
1733	44	-548.79	0.2552	0.0480769	43.12	-83.24	2498.79
1734	44	-685.34	0.4832	0.0472973	43.12	-83.24	2635.34
1735	44	-821.89	0.4122	0.0385463	43.12	-83.24	2771.89
1736	44	-958.44	0.4552	0.048951	43.12	-83.24	2908.44
1737	44	-1094.99	0.6552	0.0645756	43.12	-83.24	3044.99
1738	44	-1231.54	0.5832	0.0464191	43.12	-83.24	3181.54
1835	47	1250.65	0.014	0.0238582	40.68	-88.34	699.35
1836	47	583.64	-0.171	0.0176768	40.68	-88.34	1366.36
1837	47	-83.37	-0.2	0.0175791	40.68	-88.34	2033.37
1838	47	-750.37	0.357	0.0175703	40.68	-88.34	2700.37
1926	50	1928.18	-0.0459	0.102639	41.65	-86.53	21.82
1927	50	1906.36	-0.0459	0.102639	41.65	-86.53	43.64
1928	50	1884.55	-0.0319	0.0988701	41.65	-86.53	65.45
1929	50	1862.73	-0.0319	0.0988701	41.65	-86.53	87.27
1930	50	1857.27	-0.0459	0.102639	41.65	-86.53	92.73
1931	50	1846.36	-0.0459	0.102639	41.65	-86.53	103.64
1932	50	1699.79	-0.0609	0.10574	41.65	-86.53	250.21
1933	50	1309.16	-0.1889	0.0951087	41.65	-86.53	640.84
1934	50	788.33	-0.1039	0.108025	41.65	-86.53	1161.67
1935	50	267.49	-0.0609	0.10574	41.65	-86.53	1682.51
1936	50	-77.28	-0.1039	0.108025	41.65	-86.53	2027.28
1937	50	-245.99	-0.0319	0.0988701	41.65	-86.53	2195.99
1938	50	-499.05	0.1961	0.0331126	41.65	-86.53	2449.05
1939	50	-836.46	0.3541	0.0281577	41.65	-86.53	2786.46
1940	50	-1173.87	-0.2319	0.154867	41.65	-86.53	3123.87
2017	52	1950	0.6997	0.01341	42.02	-93.27	0
2018	52	1530.21	0.1997	0.0155694	42.02	-93.27	419.79
2019	52	1110.43	0.6717	0.0145228	42.02	-93.27	839.57
2020	52	690.64	-0.1713	0.0162262	42.02	-93.27	1259.36
2021	52	375.81	-0.1143	0.0166587	42.02	-93.27	1574.19
2022	52	113.44	-0.3853	0.0162564	42.02	-93.27	1836.56
2023	52	-148.93	0.0427	0.0202079	42.02	-93.27	2098.93
2024	52	-411.29	-0.1143	0.0166587	42.02	-93.27	2361.29
2025	52	-673.66	-0.0143	0.0178571	42.02	-93.27	2623.66
2026	52	-936.02	-0.1143	0.0166587	42.02	-93.27	2886.02
2027	52	-1198.39	0.1147	0.0178208	42.02	-93.27	3148.39
2226	58	1934.58	-0.2837	0.0273224	49.18	-81.27	15.42
2227	58	1795.78	0.3303	0.0317604	49.18	-81.27	154.22
2228	58	1641.55	0.2733	0.0206368	49.18	-81.27	308.45
2229	58	1487.33	-1.6127	0.0160624	49.18	-81.27	462.67
2230	58	1333.1	0.3583	0.0299914	49.18	-81.27	616.9
2231	58	1178.88	0.6443	0.026003	49.18	-81.27	771.12
2232	58	1024.66	0.5013	0.0288779	49.18	-81.27	925.34
2233	58	870.43	0.2583	0.0312221	49.18	-81.27	1079.57
2234	58	716.21	0.6583	0.0412736	49.18	-81.27	1233.79
2235	58	561.98	-0.4127	0.0299914	49.18	-81.27	1388.02
2236	58	407.76	0.0443	0.0270062	49.18	-81.27	1542.24
2237	58	253.54	-0.3987	0.0253623	49.18	-81.27	1696.46
2238	58	99.31	-0.2837	0.0273224	49.18	-81.27	1850.69
2239	58	-54.91	-0.3837	0.029511	49.18	-81.27	2004.91
2240	58	-209.14	-0.2987	0.027668	49.18	-81.27	2159.14
2241	58	-394.2	0.0733	0.0237127	49.18	-81.27	2344.2
2242	58	-517.58	-0.8267	0.0265957	49.18	-81.27	2467.58
2243	58	-671.81	-0.3697	0.0247875	49.18	-81.27	2621.81
2244	58	-826.03	0.9583	0.0448718	49.18	-81.27	2776.03
2245	58	-980.25	0.8163	0.0359343	49.18	-81.27	2930.25
2246	58	-1134.48	-0.2127	0.0260223	49.18	-81.27	3084.48
2247	58	-1288.7	1.0163	0.0310284	49.18	-81.27	3238.7
2289	59	1969	0.5493	0.0895141	43.5	-79.83	-19
2290	59	1965	0.4633	0.0341463	43.5	-79.83	-15
2291	59	1960	-0.1657	0.0342801	43.5	-79.83	-10
2292	59	1955	0.6203	0.0219298	43.5	-79.83	-5
2293	59	1950	-0.1657	0.0342801	43.5	-79.83	0
2294	59	1945	0.2923	0.0234427	43.5	-79.83	5
2295	59	1940	0.5773	0.0280449	43.5	-79.83	10
2296	59	1935	0.5773	0.0212895	43.5	-79.83	15
2297	59	1930	-0.2227	0.0351759	43.5	-79.83	20
2298	59	1925	-0.4507	0.0336538	43.5	-79.83	25
2299	59	1920	0.5063	0.0918635	43.5	-79.83	30
2300	59	1915	-0.2227	0.0351759	43.5	-79.83	35
2301	59	1910	-0.2227	0.0351759	43.5	-79.83	40
2302	59	1905	-0.1367	0.0376344	43.5	-79.83	45
2303	59	1900	0.2493	0.0466045	43.5	-79.83	50
2304	59	1895	-0.2227	0.0351759	43.5	-79.83	55
2305	59	1890	-0.1937	0.0347222	43.5	-79.83	60
2306	59	1885	-0.2077	0.0352823	43.5	-79.83	65
2307	59	1880	-0.1937	0.0347222	43.5	-79.83	70
2308	59	1875	-0.1937	0.0347222	43.5	-79.83	75
2309	59	1870	0.1203	0.0441362	43.5	-79.83	80
2310	59	1865	-0.2227	0.0357873	43.5	-79.83	85
2311	59	1860	-0.2077	0.0352823	43.5	-79.83	90
2312	59	1855	-0.3227	0.0365344	43.5	-79.83	95
2313	59	1850	-0.2227	0.0357873	43.5	-79.83	100
2314	59	1835	-0.2227	0.0357873	43.5	-79.83	115
2315	59	1830	-0.4797	0.0363825	43.5	-79.83	120
2316	59	1825	-0.7937	0.0341463	43.5	-79.83	125
2317	59	1820	-0.4797	0.0363825	43.5	-79.83	130
2318	59	1815	-0.1367	0.053681	43.5	-79.83	135
2319	59	1810	-0.2077	0.0577558	43.5	-79.83	140
2320	59	1805	-0.0797	0.0505051	43.5	-79.83	145
2321	59	1800	-0.1227	0.0530303	43.5	-79.83	150
2322	59	1795	-0.0797	0.0505051	43.5	-79.83	155
2323	59	1790	-0.1227	0.0530303	43.5	-79.83	160
2324	59	1780	0.1493	0.0530303	43.5	-79.83	170
2325	59	1770	0.3773	0.132576	43.5	-79.83	180
2326	59	1760	0.0343	0.077951	43.5	-79.83	190
2327	59	1750	0.1493	0.0530303	43.5	-79.83	200
2328	59	1740	0.0923	0.0581395	43.5	-79.83	210
2329	59	1730	0.9493	0.0295858	43.5	-79.83	220
2330	59	1710	0.1633	0.0424242	43.5	-79.83	240
2331	59	1700	0.1633	0.0541796	43.5	-79.83	250
2332	59	1690	0.9343	0.0295858	43.5	-79.83	260
2333	59	1680	0.3203	0.114379	43.5	-79.83	270
2334	59	1670	0.1633	0.0424242	43.5	-79.83	280
2335	59	1660	0.3923	0.165094	43.5	-79.83	290
2336	59	1650	-0.1077	0.0347567	43.5	-79.83	300
2337	59	1640	0.1203	0.0557325	43.5	-79.83	310
2338	59	1630	0.3343	0.165094	43.5	-79.83	320
2339	59	1620	0.4203	0.114379	43.5	-79.83	330
2340	59	1610	0.6633	0.0657895	43.5	-79.83	340
2341	59	1600	0.1493	0.0239562	43.5	-79.83	350
2342	59	1590	0.6343	0.0687623	43.5	-79.83	360
2343	59	1580	0.5063	0.102339	43.5	-79.83	370
2344	59	1570	1.1203	0.0639854	43.5	-79.83	380
2345	59	1560	0.0063	0.0357143	43.5	-79.83	390
2346	59	1550	0.4063	0.0345168	43.5	-79.83	400
2347	59	1540	0.2203	0.0431034	43.5	-79.83	410
2348	59	1530	-0.4367	0.0320513	43.5	-79.83	420
2349	59	1520	0.1923	0.04	43.5	-79.83	430
2350	59	1510	-0.4657	0.0325581	43.5	-79.83	440
2351	59	1500	0.3063	0.0420168	43.5	-79.83	450
2352	59	1490	0.0063	0.030648	43.5	-79.83	460
2353	59	1470	0.4343	0.0340467	43.5	-79.83	480
2354	59	1460	-0.0227	0.0327103	43.5	-79.83	490
2355	59	1450	0.4633	0.0341463	43.5	-79.83	500
2356	59	1440	0.7633	0.0665399	43.5	-79.83	510
2357	59	1430	-0.2227	0.0410317	43.5	-79.83	520
2358	59	1420	-0.6507	0.0458115	43.5	-79.83	530
2359	59	1410	-0.2657	0.0438048	43.5	-79.83	540
2360	59	1400	-0.5797	0.0493653	43.5	-79.83	550
2361	59	1390	-0.5077	0.0555556	43.5	-79.83	560
2362	59	1380	-0.5507	0.0317316	43.5	-79.83	570
2363	59	1370	-0.6657	0.030837	43.5	-79.83	580
2368	59	1239	-0.3507	0.0423216	43.5	-79.83	711
2370	59	1194	-1.0077	0.055205	43.5	-79.83	756
2371	59	1178	-1.0077	0.0486787	43.5	-79.83	772
2372	59	1160	-0.6657	0.0405562	43.5	-79.83	790
2375	59	1090	-0.2507	0.0284322	43.5	-79.83	860
2390	59	720	-1.0227	0.0577558	43.5	-79.83	1230
2404	59	410	-0.5077	0.0555556	43.5	-79.83	1540
2405	59	386	-0.4227	0.0462351	43.5	-79.83	1564
2408	59	320	-0.3657	0.0520059	43.5	-79.83	1630
2485	62	1191.34	-0.6854	0.0969529	41.55	-80.37	758.66
2486	62	641.7	-0.2854	0.0707071	41.55	-80.37	1308.3
2487	62	83.04	-0.0004	0.0304613	41.55	-80.37	1866.96
2488	62	-466.61	0.0996	0.0545171	41.55	-80.37	2416.61
2489	62	-1025.27	0.8716	0.0274941	41.55	-80.37	2975.27
2511	63	1926.36	0.5061	0.0701403	44.7	-85.96	23.64
2512	63	1882.73	0.3921	0.0688976	44.7	-85.96	67.27
2513	63	1860.91	0.3351	0.0617284	44.7	-85.96	89.09
2514	63	1853.64	-0.0509	0.115894	44.7	-85.96	96.36
2515	63	1742.34	0.2771	0.0720165	44.7	-85.96	207.66
2516	63	1527.02	-0.1079	0.0631769	44.7	-85.96	422.98
2517	63	1257.87	0.0351	0.101449	44.7	-85.96	692.13
2518	63	1249.62	-0.0939	0.0438596	44.7	-85.96	700.38
2519	63	1212.51	0.1921	0.0495751	44.7	-85.96	737.49
2520	63	1179.53	-0.4079	0.0815851	44.7	-85.96	770.47
2521	63	1142.42	-0.0079	0.0904393	44.7	-85.96	807.58
2522	63	1097.06	-0.0939	0.0486787	44.7	-85.96	852.94
2523	63	1059.95	0.0771	0.0622776	44.7	-85.96	890.05
2524	63	998.1	-0.2939	0.0555556	44.7	-85.96	951.9
2525	63	956.87	0.0631	0.0526316	44.7	-85.96	993.13
2526	63	915.63	0.1491	0.0467914	44.7	-85.96	1034.37
2527	63	843	0.1491	0.0467914	44.7	-85.96	1107
2528	63	676.16	-0.1799	0.0617284	44.7	-85.96	1273.84
2529	63	509.32	-0.0079	0.0904393	44.7	-85.96	1440.68
2530	63	342.48	0.0201	0.100575	44.7	-85.96	1607.52
2531	63	259.06	0.0351	0.0407925	44.7	-85.96	1690.94
2532	63	175.64	-0.1079	0.0631769	44.7	-85.96	1774.36
2533	63	25.49	-0.1799	0.0617284	44.7	-85.96	1924.51
2534	63	-107.98	-0.1509	0.0715746	44.7	-85.96	2057.98
2535	63	-274.82	0.1201	0.0904393	44.7	-85.96	2224.82
2536	63	-441.66	-0.2229	0.0702811	44.7	-85.96	2391.66
2537	63	-612.28	-0.0509	0.057947	44.7	-85.96	2562.28
2538	63	-697.59	0.0201	0.0606586	44.7	-85.96	2647.59
2539	63	-782.9	-0.0509	0.057947	44.7	-85.96	2732.9
2540	63	-868.21	0.3201	0.0596252	44.7	-85.96	2818.21
2541	63	-953.51	-0.0509	0.057947	44.7	-85.96	2903.51
2542	63	-1038.82	0.5491	0.0603448	44.7	-85.96	2988.82
2543	63	-1124.13	0.5491	0.0603448	44.7	-85.96	3074.13
2544	63	-1294.75	0.5631	0.0595238	44.7	-85.96	3244.75
2664	66	1950	0.6575	0.105105	45.28	-91.48	0
2665	66	1939.89	0.5005	0.0994318	45.28	-91.48	10.11
2666	66	1929.78	0.5295	0.0918635	45.28	-91.48	20.22
2667	66	1919.67	0.6435	0.110759	45.28	-91.48	30.33
2668	66	1909.57	0.4865	0.0851582	45.28	-91.48	40.43
2669	66	1899.46	0.3435	0.0392817	45.28	-91.48	50.54
2670	66	1889.35	-0.7845	0.0432099	45.28	-91.48	60.65
2671	66	1879.24	-0.1425	0.0591216	45.28	-91.48	70.76
2672	66	1869.13	-0.3275	0.0490196	45.28	-91.48	80.87
2673	66	1859.02	0.1295	0.0484094	45.28	-91.48	90.98
2674	66	1848.91	0.4865	0.0851582	45.28	-91.48	101.09
2675	66	1838.8	0.0435	0.0406977	45.28	-91.48	111.2
2676	66	1828.7	0.0435	0.0406977	45.28	-91.48	121.3
2677	66	1818.59	0.0865	0.0402299	45.28	-91.48	131.41
2678	66	1808.48	-0.4705	0.0289495	45.28	-91.48	141.52
2679	66	1798.37	-0.2705	0.0306748	45.28	-91.48	151.63
2680	66	1788.26	-0.1995	0.03305	45.28	-91.48	161.74
2681	66	1778.15	-0.0565	0.0382514	45.28	-91.48	171.85
2682	66	1768.04	0.2155	0.034585	45.28	-91.48	181.96
2683	66	1757.93	0.0155	0.0404624	45.28	-91.48	192.07
2684	66	1747.83	0.0435	0.0406977	45.28	-91.48	202.17
2685	66	1711.43	0.2575	0.0757576	45.28	-91.48	238.57
2686	66	1671	-0.1275	0.0564516	45.28	-91.48	279
2687	66	1632.59	-0.1135	0.0434783	45.28	-91.48	317.41
2688	66	1592.15	-0.7135	0.0529501	45.28	-91.48	357.85
2689	66	1553.74	0.3005	0.0821596	45.28	-91.48	396.26
2690	66	1505.22	0.2725	0.0774336	45.28	-91.48	444.78
2691	66	1463.77	0.4435	0.0883838	45.28	-91.48	486.23
2692	66	1424.35	0.2435	0.035	45.28	-91.48	525.65
2693	66	1383.91	-0.3275	0.0855746	45.28	-91.48	566.09
2694	66	1343.48	0.3005	0.0821596	45.28	-91.48	606.52
2695	66	1303.04	-0.2845	0.0510204	45.28	-91.48	646.96
2696	66	1262.61	0.3005	0.0821596	45.28	-91.48	687.39
2697	66	1222.17	0.0725	0.0409836	45.28	-91.48	727.83
2698	66	1181.74	0.1865	0.0909091	45.28	-91.48	768.26
2699	66	1141.3	-0.1135	0.376344	45.28	-91.48	808.7
2700	66	1100.87	-0.0135	0.0426309	45.28	-91.48	849.13
2701	66	1060.43	-0.5425	0.0395034	45.28	-91.48	889.57
2702	66	1020	-0.1845	0.037961	45.28	-91.48	930
2727	68	1950	-2.2349	0.0288779	44.03	-71.83	0
2728	68	1895.45	-2.6919	0.0199544	44.03	-71.83	54.55
2729	68	1840.91	-2.0919	0.0357873	44.03	-71.83	109.09
2730	68	1740.44	-0.0489	0.0257542	44.03	-71.83	209.56
2731	68	1471.75	-1.1489	0.0200803	44.03	-71.83	478.25
2732	68	1203.06	0.2941	0.0229659	44.03	-71.83	746.94
2733	68	1023.94	0.2941	0.0177846	44.03	-71.83	926.06
2734	68	568.63	-0.1639	0.0121065	44.03	-71.83	1381.37
2735	68	-66.66	0.6081	0.0201613	44.03	-71.83	2016.66
2736	68	-701.96	0.1651	0.0175791	44.03	-71.83	2651.96
2811	70	1930	1.1645	0.0243224	43.48	-85	20
2812	70	1892	-0.3355	0.0399543	43.48	-85	58
2813	70	1866	-0.2645	0.0662879	43.48	-85	84
2814	70	1752.88	-0.2075	0.0524738	43.48	-85	197.12
2815	70	1704.31	-0.8355	0.0348953	43.48	-85	245.69
2816	70	1655.75	-0.0785	0.0661626	43.48	-85	294.25
2817	70	1607.19	0.3075	0.07	43.48	-85	342.81
2818	70	1558.63	-0.1495	0.0566343	43.48	-85	391.37
2819	70	1510.07	-0.1075	0.0833333	43.48	-85	439.93
2820	70	1461.5	-0.1785	0.075594	43.48	-85	488.5
2822	70	1364.38	0.6215	0.0403691	43.48	-85	585.62
2823	70	1284.54	-0.2075	0.0800915	43.48	-85	665.46
2824	70	1204.69	-0.0785	0.0793651	43.48	-85	745.31
2825	70	1124.85	-0.3075	0.0877193	43.48	-85	825.15
2826	70	1045	0.1785	0.0321987	43.48	-85	905
2827	70	965.16	0.2925	0.0464807	43.48	-85	984.84
2828	70	885.32	-0.5645	0.0769231	43.48	-85	1064.68
2829	70	805.47	-0.0215	0.0603448	43.48	-85	1144.53
2830	70	725.63	0.2355	0.0317316	43.48	-85	1224.37
2831	70	645.78	0.5505	0.0364964	43.48	-85	1304.22
2832	70	565.94	0.9925	0.0376344	43.48	-85	1384.06
2833	70	86.87	-0.1355	0.0686275	43.48	-85	1863.13
2834	70	-152.66	0.3785	0.150862	43.48	-85	2102.66
2835	70	-392.19	-0.3925	0.0399543	43.48	-85	2342.19
2836	70	-631.72	-0.3215	0.0474255	43.48	-85	2581.72
2837	70	-871.26	-0.1785	0.0472335	43.48	-85	2821.26
2838	70	-1110.79	0.7645	0.0423729	43.48	-85	3060.79
2885	71	1871.86	0.9139	0.0601375	48.08	-98.93	78.14
2886	71	1755.59	0.0289	0.0484765	48.08	-98.93	194.41
2887	71	1639.31	-0.3001	0.0632911	48.08	-98.93	310.69
2888	71	1523.04	0.2569	0.0349301	48.08	-98.93	426.96
2889	71	1406.76	0.1719	0.0401837	48.08	-98.93	543.24
2890	71	1057.94	-0.1001	0.0465426	48.08	-98.93	892.06
2891	71	767.25	-0.1001	0.0465426	48.08	-98.93	1182.75
2892	71	534.7	-0.7431	0.0366492	48.08	-98.93	1415.3
2893	71	302.15	0.2569	0.0349301	48.08	-98.93	1647.85
2894	71	185.88	0.2999	0.0435866	48.08	-98.93	1764.12
2895	71	11.47	-0.1001	0.0465426	48.08	-98.93	1938.53
2896	71	-279.22	0.3999	0.044586	48.08	-98.93	2229.22
2897	71	-511.77	-0.1001	0.0465426	48.08	-98.93	2461.77
2898	71	-802.45	-0.4711	0.0290216	48.08	-98.93	2752.45
2899	71	-1035	0.5289	0.0349301	48.08	-98.93	2985
2921	72	1943	0.136	0.0991501	43.42	-89.73	7
2922	72	1922.01	0.421	0.0570962	43.42	-89.73	27.99
2923	72	1824.07	0.007	0.125899	43.42	-89.73	125.93
2924	72	1726.12	0.293	0.0643382	43.42	-89.73	223.88
2925	72	1677.15	0.05	0.0788288	43.42	-89.73	272.85
2926	72	1636.07	-0.022	0.0877193	43.42	-89.73	313.93
2927	72	1524.78	-0.022	0.0877193	43.42	-89.73	425.22
2928	72	1420.04	0.121	0.0829384	43.42	-89.73	529.96
2929	72	1321.84	-0.007	0.0895141	43.42	-89.73	628.16
2930	72	1217.1	0.078	0.0724638	43.42	-89.73	732.9
2931	72	1118.9	-0.007	0.0895141	43.42	-89.73	831.1
2932	72	1027.25	-0.15	0.0782998	43.42	-89.73	922.75
2933	72	929.06	-0.007	0.0895141	43.42	-89.73	1020.94
2934	72	837.41	-0.136	0.0788288	43.42	-89.73	1112.59
2935	72	745.76	-0.307	0.16129	43.42	-89.73	1204.24
2936	72	654.11	-0.164	0.165094	43.42	-89.73	1295.89
2937	72	562.46	-0.222	0.124555	43.42	-89.73	1387.54
2938	72	477.36	-0.079	0.0895141	43.42	-89.73	1472.64
2939	72	392.25	0.121	0.0829384	43.42	-89.73	1557.75
2940	72	307.15	-0.007	0.0895141	43.42	-89.73	1642.85
2941	72	222.05	0.036	0.0833333	43.42	-89.73	1727.95
2942	72	136.95	-0.007	0.0895141	43.42	-89.73	1813.05
2943	72	58.39	0.121	0.0774336	43.42	-89.73	1891.61
2944	72	-20.17	0.221	0.0849515	43.42	-89.73	1970.17
2945	72	-119.78	0.107	0.0806452	43.42	-89.73	2069.78
2946	72	-280.29	0.064	0.0928382	43.42	-89.73	2230.29
2947	72	-387.29	-0.222	0.124555	43.42	-89.73	2337.29
2948	72	-510.09	0.221	0.075431	43.42	-89.73	2460.09
2949	72	-621.93	-0.222	0.124555	43.42	-89.73	2571.93
2950	72	-733.78	-0.222	0.124555	43.42	-89.73	2683.78
2951	72	-845.62	0.05	0.0839329	43.42	-89.73	2795.62
2952	72	-957.46	0.321	0.0631769	43.42	-89.73	2907.46
2953	72	-1069.3	0.221	0.0604491	43.42	-89.73	3019.3
2954	72	-1181.15	-0.15	0.103858	43.42	-89.73	3131.15
2955	72	-1292.99	-0.007	0.0895141	43.42	-89.73	3242.99
3092	75	1420.75	-0.4029	0.0795455	43.92	-89.17	529.25
3093	75	1273.6	0.0971	0.0694444	43.92	-89.17	676.4
3094	75	1126.45	-0.0029	0.128676	43.92	-89.17	823.55
3095	75	979.3	0.5261	0.0431566	43.92	-89.17	970.7
3096	75	832.16	-0.0029	0.128676	43.92	-89.17	1117.84
3097	75	685.01	0.0261	0.13834	43.92	-89.17	1264.99
3098	75	537.86	-0.3889	0.0767544	43.92	-89.17	1412.14
3099	75	390.71	-0.4029	0.0795455	43.92	-89.17	1559.29
3101	75	-50.73	0.2971	0.0568182	43.92	-89.17	2000.73
3102	75	-197.88	-0.9739	0.546875	43.92	-89.17	2147.88
3103	75	-345.03	0.0541	0.0791855	43.92	-89.17	2295.03
3104	75	-492.18	-0.0459	0.18617	43.92	-89.17	2442.18
3105	75	-639.33	0.3691	0.0577558	43.92	-89.17	2589.33
3106	75	-786.48	0.1401	0.128205	43.92	-89.17	2736.48
3107	75	-933.63	0.7111	0.0507246	43.92	-89.17	2883.63
3108	75	-1092.56	0.0971	0.102339	43.92	-89.17	3042.56
3143	76	1907.14	1.0522	0.0436409	46.45	-71.5	42.86
3144	76	1821.43	-0.7908	0.0190321	46.45	-71.5	128.57
3145	76	1534.06	-0.0758	0.0938338	46.45	-71.5	415.94
3146	76	1090.81	-0.4478	0.0669216	46.45	-71.5	859.19
3147	76	647.57	0.0522	0.0256787	46.45	-71.5	1302.43
3148	76	204.33	0.7092	0.0222081	46.45	-71.5	1745.67
3149	76	-238.91	-0.0188	0.0589226	46.45	-71.5	2188.91
3150	76	-682.15	-0.2188	0.0535988	46.45	-71.5	2632.15
3151	76	-1125.39	-0.0338	0.0504323	46.45	-71.5	3075.39
3170	77	1950	-0.1749	0.0561798	41.93	-70	0
3171	77	1950	-0.1889	0.0561798	41.93	-70	0
3172	77	1700	-0.1889	0.056	41.93	-70	250
3173	77	1670	-0.0749	0.0517751	41.93	-70	280
3174	77	1640	-0.1889	0.056	41.93	-70	310
3175	77	1526.71	0.0971	0.0911458	41.93	-70	423.29
3176	77	1060.27	0.3541	0.0452196	41.93	-70	889.73
3177	77	587.42	0.0111	0.0956284	41.93	-70	1362.58
3178	77	95.33	-0.3459	0.041816	41.93	-70	1854.67
3179	77	-396.76	0.0681	0.110759	41.93	-70	2346.76
3180	77	-741.22	0.2681	0.0997151	41.93	-70	2691.22
3215	78	1800	-0.3942	0.0879397	45.85	-70.35	150
3216	78	1165.6	0.4338	0.0835322	45.85	-70.35	784.4
3217	78	519.73	-0.0942	0.0459921	45.85	-70.35	1430.27
3218	78	20.12	-0.1942	0.0567261	45.85	-70.35	1929.88
3219	78	-453.68	-0.2512	0.0493653	45.85	-70.35	2403.68
3220	78	-927.48	0.1058	0.0674374	45.85	-70.35	2877.48
3242	79	1950	-0.2432	0.0207592	44.17	-71.67	0
3243	79	1750	-0.2142	0.0214592	44.17	-71.67	200
3244	79	1124.9	-0.0572	0.0199658	44.17	-71.67	825.1
3245	79	968.62	0.0428	0.0249288	44.17	-71.67	981.38
3246	79	-177.4	0.2288	0.0244243	44.17	-71.67	2127.4
3353	82	1947.33	0.0056	0.0416667	44.37	-80.25	2.67
3354	82	1923.33	-0.3794	0.0469799	44.37	-80.25	26.67
3355	82	1896.67	0.1916	0.0423729	44.37	-80.25	53.33
3356	82	1870	0.5636	0.0351053	44.37	-80.25	80
3357	82	1843.33	-0.0364	0.0448143	44.37	-80.25	106.67
3358	82	1725.25	0.4206	0.0357873	44.37	-80.25	224.75
3359	82	1515.75	-0.4944	0.137255	44.37	-80.25	434.25
3360	82	1306.25	0.0486	0.0554675	44.37	-80.25	643.75
3361	82	1096.75	-0.0364	0.0458716	44.37	-80.25	853.25
3362	82	887.25	-0.3224	0.0859951	44.37	-80.25	1062.75
3363	82	677.75	0.0206	0.0417163	44.37	-80.25	1272.25
3364	82	468.26	0.0206	0.0417163	44.37	-80.25	1481.74
3365	82	258.76	0.0776	0.0443599	44.37	-80.25	1691.24
3366	82	49.26	0.2346	0.0436409	44.37	-80.25	1900.74
3367	82	-160.24	-0.3224	0.0859951	44.37	-80.25	2110.24
3368	82	-369.74	0.2346	0.0436409	44.37	-80.25	2319.74
3369	82	-579.24	0.2056	0.0446999	44.37	-80.25	2529.24
3370	82	-788.74	0.0486	0.0429448	44.37	-80.25	2738.74
3371	82	-998.24	-0.1364	0.0659134	44.37	-80.25	2948.24
3372	82	-1207.74	0.2636	0.0455137	44.37	-80.25	3157.74
3582	87	1928.09	-0.069	0.0886076	42.33	-83.63	21.91
3583	87	1903.14	-0.098	0.136719	42.33	-83.63	46.86
3584	87	1874.79	-0.155	0.0711382	42.33	-83.63	75.21
3585	87	1864.87	-0.012	0.104167	42.33	-83.63	85.13
3586	87	1840.77	-0.041	0.11254	42.33	-83.63	109.23
3587	87	1618.27	0.016	0.10574	42.33	-83.63	331.73
3588	87	1556	0.045	0.0988701	42.33	-83.63	394
3589	87	1331.81	0.016	0.10574	42.33	-83.63	618.19
3590	87	1120.08	-0.027	0.108025	42.33	-83.63	829.92
3591	87	717.95	0.016	0.10574	42.33	-83.63	1232.05
3592	87	575.55	0.016	0.10574	42.33	-83.63	1374.45
3593	87	397.56	0.016	0.10574	42.33	-83.63	1552.44
3594	87	-341.47	-0.098	0.091623	42.33	-83.63	2291.47
3595	87	-1058.93	-0.098	0.091623	42.33	-83.63	3008.93
3644	89	1850	0.0504	0.100287	49.58	-93.75	100
3645	89	1592.21	0.0224	0.0945946	49.58	-93.75	357.79
3646	89	1334.42	0.0504	0.100287	49.58	-93.75	615.58
3647	89	1076.63	0.0504	0.100287	49.58	-93.75	873.37
3648	89	561.04	-0.0496	0.0819672	49.58	-93.75	1388.96
3649	89	303.25	-0.1636	0.0529501	49.58	-93.75	1646.75
3650	89	45.46	0.0224	0.0909091	49.58	-93.75	1904.54
3651	89	-212.33	0.0224	0.0909091	49.58	-93.75	2162.33
3652	89	-470.12	0.0224	0.0909091	49.58	-93.75	2420.12
3653	89	-985.7	0.0224	0.0909091	49.58	-93.75	2935.7
3654	89	-1243.49	0.0224	0.0909091	49.58	-93.75	3193.49
3700	91	1761.59	-0.2909	0.124113	46.28	-73.48	188.41
3701	91	1584.77	-0.1049	0.0519288	46.28	-73.48	365.23
3702	91	1407.95	-0.3339	0.125	46.28	-73.48	542.05
3703	91	965.89	-0.1769	0.0426309	46.28	-73.48	984.11
3704	91	523.84	-0.1339	0.0502874	46.28	-73.48	1426.16
3705	91	109.88	-0.5049	0.037797	46.28	-73.48	1840.12
3706	91	-51.18	0.1521	0.0482759	46.28	-73.48	2001.18
3707	91	-212.24	0.2521	0.0473613	46.28	-73.48	2162.24
3708	91	-373.3	0.5811	0.0598291	46.28	-73.48	2323.3
3709	91	-534.36	0.2231	0.0433705	46.28	-73.48	2484.36
3710	91	-598.78	0.0521	0.0474898	46.28	-73.48	2548.78
3711	91	-695.42	-0.0479	0.0388457	46.28	-73.48	2645.42
3712	91	-856.47	-0.1049	0.0381264	46.28	-73.48	2806.47
3713	91	-920.9	0.5521	0.128205	46.28	-73.48	2870.9
3714	91	-1017.53	-0.4049	0.0374332	46.28	-73.48	2967.53
3715	91	-1081.96	0.2381	0.0643382	46.28	-73.48	3031.96
3716	91	-1178.59	0.6381	0.0791855	46.28	-73.48	3128.59
3758	92	1950	0.58	0.0532725	44.05	-87.73	0
3759	92	1916.18	0.68	0.0586265	44.05	-87.73	33.82
3760	92	1871.08	0.123	0.060241	44.05	-87.73	78.92
3761	92	1835.01	-0.477	0.0698603	44.05	-87.73	114.99
3762	92	1805.2	-0.291	0.116667	44.05	-87.73	144.8
3763	92	1375.08	-0.477	0.0682261	44.05	-87.73	574.92
3764	92	616.05	0.537	0.0528701	44.05	-87.73	1333.95
3765	92	110.03	-0.477	0.460526	44.05	-87.73	1839.97
3766	92	-142.98	-0.02	0.0686275	44.05	-87.73	2092.98
3767	92	-649	0.437	0.1417	44.05	-87.73	2599
3768	92	-1155.02	-0.106	0.0808314	44.05	-87.73	3105.02
3856	94	1938.24	0.3932	0.030837	49.43	-99.28	11.76
3857	94	1926.47	1.2072	0.0255288	49.43	-99.28	23.53
3858	94	1914.71	-0.1928	0.0892857	49.43	-99.28	35.29
3859	94	1902.94	-0.2068	0.0883838	49.43	-99.28	47.06
3860	94	1891.18	-0.1208	0.0839329	49.43	-99.28	58.82
3861	94	1879.41	-0.0208	0.164319	49.43	-99.28	70.59
3862	94	1867.65	-0.0208	0.164319	49.43	-99.28	82.35
3863	94	1855.88	-0.0208	0.164319	49.43	-99.28	94.12
3864	94	1838.06	-0.1638	0.0825472	49.43	-99.28	111.94
3865	94	1814.18	-0.1638	0.0825472	49.43	-99.28	135.82
3866	94	1790.31	-0.1638	0.0825472	49.43	-99.28	159.69
3867	94	1766.43	-0.0208	0.126354	49.43	-99.28	183.57
3868	94	1742.55	0.3222	0.077951	49.43	-99.28	207.45
3869	94	1694.8	0.1362	0.0825472	49.43	-99.28	255.2
3870	94	1456.02	-0.0638	0.142857	49.43	-99.28	493.98
3871	94	1217.25	-0.1348	0.140562	49.43	-99.28	732.75
3872	94	978.47	0.1362	0.0825472	49.43	-99.28	971.53
3873	94	739.7	-0.0208	0.164319	49.43	-99.28	1210.3
3874	94	500.93	-0.2638	0.0825472	49.43	-99.28	1449.07
3875	94	262.15	-0.0208	0.164319	49.43	-99.28	1687.85
3876	94	23.38	-0.1928	0.0790068	49.43	-99.28	1926.62
3877	94	-275.09	0.5072	0.027027	49.43	-99.28	2225.09
3878	94	-504.22	-0.0778	0.0802752	49.43	-99.28	2454.22
3879	94	-704.42	-0.1638	0.0825472	49.43	-99.28	2654.42
3880	94	-904.62	-0.1638	0.0825472	49.43	-99.28	2854.62
3881	94	-1104.81	-0.1638	0.0825472	49.43	-99.28	3054.81
4074	99	1750	0.2941	0.0335249	44.88	-85.12	200
4075	99	1419.07	0.1221	0.0448143	44.88	-85.12	530.93
4076	99	1088.14	-0.1349	0.0413223	44.88	-85.12	861.86
4077	99	757.21	0.1221	0.0448143	44.88	-85.12	1192.79
4078	99	426.28	-0.0209	0.0475543	44.88	-85.12	1523.72
4079	99	95.35	-0.0059	0.0472335	44.88	-85.12	1854.65
4080	99	-235.58	-0.1779	0.0445293	44.88	-85.12	2185.58
4081	99	-566.52	-0.0209	0.0475543	44.88	-85.12	2516.52
4082	99	-897.45	-0.1779	0.0445293	44.88	-85.12	2847.45
4083	99	-1228.38	-0.2059	0.0429448	44.88	-85.12	3178.38
4155	101	1950	0.6202	0.0535168	44.42	-76.7	0
4156	101	1883.33	0.6202	0.0741525	44.42	-76.7	66.67
4157	101	1682.26	-0.2518	0.0729167	44.42	-76.7	267.74
4158	101	843.55	-0.1368	0.0601375	44.42	-76.7	1106.45
4159	101	424.19	0.3912	0.0617284	44.42	-76.7	1525.81
4160	101	4.84	0.0202	0.0614035	44.42	-76.7	1945.16
4161	101	-624.19	-0.0228	0.0436409	44.42	-76.7	2574.19
4162	101	-1253.23	0.2202	0.0514706	44.42	-76.7	3203.23
4216	103	1167.65	0.2075	0.0365726	42.57	-72.88	782.35
4217	103	602.94	0.0785	0.0436954	42.57	-72.88	1347.06
4218	103	38.24	-0.3645	0.0338819	42.57	-72.88	1911.76
4219	103	-526.47	0.0785	0.0376344	42.57	-72.88	2476.47
4220	103	-1091.18	0.2645	0.0381679	42.57	-72.88	3041.18
4237	104	1950	-0.4417	0.0336538	44.18	-73.97	0
4238	104	1875	-1.8277	0.0163475	44.18	-73.97	75
4239	104	1652.61	-0.5697	0.0388889	44.18	-73.97	297.39
4240	104	1357.84	-0.1417	0.0966851	44.18	-73.97	592.16
4241	104	1063.07	-0.2697	0.0958904	44.18	-73.97	886.93
4242	104	768.3	-0.1847	0.094086	44.18	-73.97	1181.7
4243	104	473.53	-0.2277	0.0795455	44.18	-73.97	1476.47
4244	104	351.18	-0.0847	0.0895141	44.18	-73.97	1598.82
4245	104	294.24	0.0583	0.0839329	44.18	-73.97	1655.76
4246	104	237.29	0.1443	0.182292	44.18	-73.97	1712.71
4247	104	180.35	0.0873	0.0641026	44.18	-73.97	1769.65
4248	104	-152.11	0.5443	0.0325885	44.18	-73.97	2102.11
4249	104	-638.69	0.6443	0.0363448	44.18	-73.97	2588.69
4285	107	1960	-0.078	0.0650558	46.18	-89.7	-10
4286	107	1950	0.365	0.0508721	46.18	-89.7	0
4287	107	1940	0.165	0.0475543	46.18	-89.7	10
4288	107	1930	0.436	0.0516224	46.18	-89.7	20
4289	107	1920	0.093	0.0553797	46.18	-89.7	30
4290	107	1910	-0.164	0.0541796	46.18	-89.7	40
4291	107	1900	-0.278	0.0821596	46.18	-89.7	50
4292	107	1890	0.022	0.0528701	46.18	-89.7	60
4293	107	1880	-0.35	0.0676983	46.18	-89.7	70
4294	107	1870	-0.378	0.0829384	46.18	-89.7	80
4295	107	1860	-0.278	0.0821596	46.18	-89.7	90
4296	107	1850	-0.121	0.0671785	46.18	-89.7	100
4297	107	1830	-0.435	0.170732	46.18	-89.7	120
4298	107	1820	0.022	0.0528701	46.18	-89.7	130
4299	107	1800	0.15	0.0620567	46.18	-89.7	150
4300	107	1790	-0.207	0.0690335	46.18	-89.7	160
4301	107	1770	-0.35	0.0855746	46.18	-89.7	180
4302	107	1760	-0.078	0.0570962	46.18	-89.7	190
4303	107	1720	-0.15	0.057377	46.18	-89.7	230
4304	107	1690	-0.35	0.0855746	46.18	-89.7	260
4305	107	1660	0.093	0.0576606	46.18	-89.7	290
4306	107	1620	-0.064	0.0570033	46.18	-89.7	330
4307	107	1590	-0.135	0.0558214	46.18	-89.7	360
4308	107	1580	-0.207	0.0690335	46.18	-89.7	370
4309	107	1560	-0.021	0.0645756	46.18	-89.7	390
4310	107	1540	-0.307	0.0853659	46.18	-89.7	410
4311	107	1520	0.336	0.061296	46.18	-89.7	430
4312	107	1500	-0.135	0.0558214	46.18	-89.7	450
4313	107	1460	-0.121	0.0535168	46.18	-89.7	490
4314	107	1440	-0.135	0.0558214	46.18	-89.7	510
4315	107	1420	-0.064	0.0570033	46.18	-89.7	530
4316	107	1380	-0.164	0.0541796	46.18	-89.7	570
4317	107	1340	0.079	0.0481431	46.18	-89.7	610
4318	107	1300	-0.064	0.0570033	46.18	-89.7	650
4319	107	1280	-0.378	0.0829384	46.18	-89.7	670
4320	107	1260	-0.378	0.0829384	46.18	-89.7	690
4321	107	1220	0.079	0.0481431	46.18	-89.7	730
4322	107	1180	-0.121	0.0535168	46.18	-89.7	770
4323	107	1140	-0.007	0.0510204	46.18	-89.7	810
4324	107	1110	0.065	0.0538462	46.18	-89.7	840
4325	107	1070	-0.135	0.0558214	46.18	-89.7	880
4326	107	1010	-0.35	0.0855746	46.18	-89.7	940
4327	107	970	-0.135	0.0558214	46.18	-89.7	980
4328	107	950	0.079	0.0481431	46.18	-89.7	1000
4329	107	930	0.079	0.0481431	46.18	-89.7	1020
4330	107	870	-0.064	0.0570033	46.18	-89.7	1080
4331	107	850	-0.207	0.0690335	46.18	-89.7	1100
4332	107	830	0.093	0.0469169	46.18	-89.7	1120
4333	107	810	0.107	0.0475543	46.18	-89.7	1140
4334	107	790	-0.164	0.0541796	46.18	-89.7	1160
4335	107	770	-0.007	0.0510204	46.18	-89.7	1180
4336	107	750	-0.121	0.0535168	46.18	-89.7	1200
4337	107	730	0.15	0.0438048	46.18	-89.7	1220
4338	107	710	-0.121	0.0553797	46.18	-89.7	1240
4339	107	690	0.393	0.0400916	46.18	-89.7	1260
4340	107	670	0.107	0.0457516	46.18	-89.7	1280
4341	107	650	0.093	0.0469169	46.18	-89.7	1300
4342	107	610	0.022	0.0528701	46.18	-89.7	1340
4343	107	570	0.265	0.0475543	46.18	-89.7	1380
4344	107	530	0.322	0.0440252	46.18	-89.7	1420
4345	107	490	0.136	0.0434783	46.18	-89.7	1460
4346	107	450	0.336	0.0455137	46.18	-89.7	1500
4347	107	410	0.093	0.0469169	46.18	-89.7	1540
4348	107	370	0.036	0.0529501	46.18	-89.7	1580
4349	107	330	-0.121	0.0535168	46.18	-89.7	1620
4350	107	290	-0.05	0.0483425	46.18	-89.7	1660
4351	107	250	0.022	0.0504323	46.18	-89.7	1700
4352	107	210	0.165	0.0429448	46.18	-89.7	1740
4353	107	170	0.25	0.0445293	46.18	-89.7	1780
4354	107	130	0.336	0.0455137	46.18	-89.7	1820
4355	107	90	0.036	0.0529501	46.18	-89.7	1860
4356	107	50	0.165	0.0429448	46.18	-89.7	1900
4357	107	10	0.136	0.0471063	46.18	-89.7	1940
4358	107	-30	0.022	0.0520059	46.18	-89.7	1980
4359	107	-70	0.179	0.0434783	46.18	-89.7	2020
4404	110	1950	-0.2631	0.0591216	42.54	-78.67	0
4405	110	1916.85	-0.0491	0.0358974	42.54	-78.67	33.15
4406	110	1861.6	0.2799	0.0417163	42.54	-78.67	88.4
4407	110	1806.35	0.0509	0.0324675	42.54	-78.67	143.65
4408	110	1760.37	-0.1061	0.0446429	42.54	-78.67	189.63
4409	110	1720.57	-0.2491	0.0458716	42.54	-78.67	229.43
4410	110	1601.17	-0.2631	0.0461741	42.54	-78.67	348.83
4411	110	1322.57	-0.2631	0.0461741	42.54	-78.67	627.43
4412	110	1163.36	0.0649	0.0391499	42.54	-78.67	786.64
4413	110	924.56	-0.2631	0.0461741	42.54	-78.67	1025.44
4414	110	765.36	-0.0631	0.0365726	42.54	-78.67	1184.64
4415	110	526.56	-0.2201	0.0364583	42.54	-78.67	1423.44
4416	110	367.36	-0.0631	0.0365726	42.54	-78.67	1582.64
4417	110	128.55	0.4369	0.0348606	42.54	-78.67	1821.45
4418	110	-70.45	0.3509	0.0313339	42.54	-78.67	2020.45
4419	110	-269.45	0.3509	0.0313339	42.54	-78.67	2219.45
4420	110	-468.45	0.1509	0.0448718	42.54	-78.67	2418.45
4421	110	-667.45	0.0649	0.0391499	42.54	-78.67	2617.45
4422	110	-866.46	-0.0351	0.0374332	42.54	-78.67	2816.46
4423	110	-1065.46	-0.0351	0.0374332	42.54	-78.67	3015.46
4424	110	-1224.66	0.3509	0.0313339	42.54	-78.67	3174.66
4463	111	1907.14	-0.0117	0.106383	41.67	-86.53	42.86
4464	111	1871.14	-0.0117	0.106383	41.67	-86.53	78.86
4465	111	1840.29	0.0453	0.10574	41.67	-86.53	109.71
4466	111	1796.12	0.0453	0.10574	41.67	-86.53	153.88
4467	111	1702.95	0.0453	0.10574	41.67	-86.53	247.05
4468	111	1618.25	0.0453	0.10574	41.67	-86.53	331.75
4469	111	1491.2	0.0453	0.10574	41.67	-86.53	458.8
4470	111	1406.5	0.0453	0.10574	41.67	-86.53	543.5
4471	111	1321.8	-0.3977	0.0480769	41.67	-86.53	628.2
4472	111	1237.1	0.0453	0.10574	41.67	-86.53	712.9
4473	111	1152.4	0.0313	0.109034	41.67	-86.53	797.6
4474	111	1067.7	0.0453	0.10574	41.67	-86.53	882.3
4475	111	983	0.0453	0.10574	41.67	-86.53	967
4476	111	898.31	0.0453	0.10574	41.67	-86.53	1051.69
4477	111	813.61	0.0453	0.10574	41.67	-86.53	1136.39
4478	111	644.21	0.0453	0.10574	41.67	-86.53	1305.79
4479	111	559.51	0.0453	0.10574	41.67	-86.53	1390.49
4480	111	517.16	0.0453	0.10574	41.67	-86.53	1432.84
4481	111	474.81	0.0453	0.10574	41.67	-86.53	1475.19
4482	111	390.11	0.0453	0.10574	41.67	-86.53	1559.89
4483	111	305.41	-0.0687	0.091623	41.67	-86.53	1644.59
4484	111	220.71	-0.3397	0.0480769	41.67	-86.53	1729.29
4485	111	136.01	-0.0687	0.091623	41.67	-86.53	1813.99
4486	111	51.31	0.0453	0.10574	41.67	-86.53	1898.69
4487	111	8.96	0.0453	0.10574	41.67	-86.53	1941.04
4488	111	-366.01	0.0453	0.10574	41.67	-86.53	2316.01
4489	111	-928.47	0.0743	0.0988701	41.67	-86.53	2878.47
4633	114	1927.66	0.0128	0.0436954	47.32	-81.77	22.34
4634	114	1726.58	-0.1152	0.0619469	47.32	-81.77	223.42
4635	114	1570.18	-1.0442	0.027933	47.32	-81.77	379.82
4636	114	1369.1	0.0418	0.0440252	47.32	-81.77	580.9
4637	114	1190.36	0.1988	0.0404624	47.32	-81.77	759.64
4638	114	989.28	-0.0722	0.18617	47.32	-81.77	960.72
4639	114	743.52	0.1418	0.0397727	47.32	-81.77	1206.48
4640	114	609.46	0.2278	0.0620567	47.32	-81.77	1340.54
4641	114	386.04	0.1278	0.0395928	47.32	-81.77	1563.96
4642	114	162.62	0.1848	0.0392817	47.32	-81.77	1787.38
4643	114	-60.81	0.0128	0.0327103	47.32	-81.77	2010.81
4644	114	-284.23	0.0278	0.0759219	47.32	-81.77	2234.23
4645	114	-507.65	0.3418	0.0547731	47.32	-81.77	2457.65
4646	114	-731.08	0.1278	0.0395928	47.32	-81.77	2681.08
4647	114	-954.5	-0.2012	0.0401376	47.32	-81.77	2904.5
4648	114	-1177.92	0.0558	0.077951	47.32	-81.77	3127.92
4738	116	1932.5	0.6842	0.0498575	46.42	-92.72	17.5
4739	116	1897.5	0.2552	0.0541796	46.42	-92.72	52.5
4740	116	1833.78	0.1272	0.0465426	46.42	-92.72	116.22
4741	116	1741.34	-0.1588	0.0466667	46.42	-92.72	208.66
4742	116	1648.9	-0.1588	0.0466667	46.42	-92.72	301.1
4743	116	1556.45	0.0552	0.0485437	46.42	-92.72	393.55
4744	116	1417.79	0.0552	0.0485437	46.42	-92.72	532.21
4745	116	1325.35	0.0412	0.0474255	46.42	-92.72	624.65
4746	116	1232.91	-0.0308	0.0453368	46.42	-92.72	717.09
4747	116	1140.47	0.1692	0.0466667	46.42	-92.72	809.53
4748	116	1048.03	-0.0308	0.0453368	46.42	-92.72	901.97
4749	116	955.59	-0.0308	0.0453368	46.42	-92.72	994.41
4750	116	863.14	0.1412	0.0461133	46.42	-92.72	1086.86
4751	116	770.7	-0.1588	0.0466667	46.42	-92.72	1179.3
4752	116	678.26	-0.0878	0.0424242	46.42	-92.72	1271.74
4753	116	585.82	-0.3158	0.0424242	46.42	-92.72	1364.18
4754	116	493.38	0.1412	0.047749	46.42	-92.72	1456.62
4755	116	400.94	-0.3448	0.0404624	46.42	-92.72	1549.06
4756	116	308.49	-0.3878	0.0366492	46.42	-92.72	1641.51
4757	116	216.05	-0.0588	0.0439698	46.42	-92.72	1733.95
4758	116	123.61	0.1412	0.0461133	46.42	-92.72	1826.39
4759	116	31.17	0.3552	0.0547731	46.42	-92.72	1918.83
4760	116	-61.27	0.1692	0.0466667	46.42	-92.72	2011.27
4761	116	-153.71	-0.0308	0.0453368	46.42	-92.72	2103.71
4762	116	-246.15	0.1692	0.0466667	46.42	-92.72	2196.15
4763	116	-338.6	-0.0308	0.0453368	46.42	-92.72	2288.6
4764	116	-523.48	0.1692	0.0448718	46.42	-92.72	2473.48
4765	116	-615.92	-0.0448	0.0446429	46.42	-92.72	2565.92
4766	116	-708.36	0.0842	0.0507246	46.42	-92.72	2658.36
4767	116	-800.8	0.1552	0.0455137	46.42	-92.72	2750.8
4768	116	-893.24	0.3692	0.0544323	46.42	-92.72	2843.24
4769	116	-985.69	-0.3448	0.0404624	46.42	-92.72	2935.69
4770	116	-1078.13	-0.1308	0.0395034	46.42	-92.72	3028.13
4771	116	-1216.79	-0.0588	0.0439698	46.42	-92.72	3166.79
4821	117	740.03	-0.619	0.0209581	42.26	-93.7	1209.97
4822	117	226.71	1.024	0.0208582	42.26	-93.7	1723.29
4823	117	-616.6	-0.405	0.0161738	42.26	-93.7	2566.6
4876	118	972.67	0.0425	0.049435	48.68	-86.45	977.33
4877	118	-53.44	-0.0425	0.0514706	48.68	-86.45	2003.44
4878	118	-1198.21	0.2575	0.0368421	48.68	-86.45	3148.21
4913	120	1865	-2.2375	0.0157303	48.37	-71.57	85
4914	120	1650.2	-0.5515	0.0252525	48.37	-71.57	299.8
4915	120	1350.59	0.2335	0.0406504	48.37	-71.57	599.41
4916	120	976.09	-0.1665	0.0412736	48.37	-71.57	973.91
4917	120	601.58	0.4485	0.0301984	48.37	-71.57	1348.42
4918	120	227.07	0.1055	0.039548	48.37	-71.57	1722.93
4919	120	-147.43	0.0915	0.0428397	48.37	-71.57	2097.43
4920	120	-521.94	-0.1375	0.0388457	48.37	-71.57	2471.94
4921	120	-896.45	-0.0235	0.0391499	48.37	-71.57	2846.45
4922	120	-1270.95	-0.2235	0.0407925	48.37	-71.57	3220.95
4944	122	1950	-0.3348	0.0206856	44.13	-71.73	0
4945	122	1923.75	-0.8918	0.0257922	44.13	-71.73	26.25
4946	122	1902.75	-0.6058	0.0215252	44.13	-71.73	47.25
4947	122	1871.25	-0.7918	0.0243902	44.13	-71.73	78.75
4948	122	1845	-0.1628	0.0234584	44.13	-71.73	105
4949	122	1608.86	0.3512	0.0686275	44.13	-71.73	341.14
4950	122	1372.73	-0.2768	0.0252343	44.13	-71.73	577.27
4951	122	900.45	0.1082	0.0242887	44.13	-71.73	1049.55
4952	122	-44.09	0.3802	0.0204559	44.13	-71.73	1994.09
4953	122	-988.64	-0.5628	0.0239234	44.13	-71.73	2938.64
4969	123	1750	0.3077	0.0510204	44.27	-93.12	200
4970	123	1619.54	0.2507	0.0427873	44.27	-93.12	330.46
4971	123	1402.12	-0.2493	0.0263158	44.27	-93.12	547.88
4972	123	1184.69	-0.6923	0.0264951	44.27	-93.12	765.31
4973	123	967.27	0.3507	0.0481431	44.27	-93.12	982.73
4974	123	749.84	-0.3923	0.0403691	44.27	-93.12	1200.16
4975	123	532.42	-0.4063	0.0396376	44.27	-93.12	1417.58
4976	123	266.46	0.1937	0.0853659	44.27	-93.12	1683.54
4977	123	-72.28	0.3217	0.06917	44.27	-93.12	2022.28
4978	123	-411.02	0.1937	0.0715746	44.27	-93.12	2361.02
4979	123	-749.77	0.1217	0.0772627	44.27	-93.12	2699.77
4980	123	-1088.51	0.2077	0.0736842	44.27	-93.12	3038.51
5091	125	1800	-0.6283	0.0336862	46.72	-92.62	150
5092	125	1489.56	-0.4713	0.0345508	46.72	-92.62	460.44
5093	125	1179.11	-0.4853	0.0358974	46.72	-92.62	770.89
5094	125	868.67	-0.0143	0.0309187	46.72	-92.62	1081.33
5095	125	558.23	-0.0573	0.0372737	46.72	-92.62	1391.77
5096	125	247.78	0.4147	0.0604491	46.72	-92.62	1702.22
5097	125	-62.66	0.2427	0.0413712	46.72	-92.62	2012.66
5098	125	-373.1	-0.0713	0.0387168	46.72	-92.62	2323.1
5099	125	-683.55	-0.0003	0.056	46.72	-92.62	2633.55
5100	125	-993.99	0.4427	0.0293871	46.72	-92.62	2943.99
5194	127	1894	-0.6145	0.0503597	46.72	-70.3	56
5195	127	1750	0.0715	0.0562701	46.72	-70.3	200
5196	127	1431.71	0.1995	0.05	46.72	-70.3	518.29
5197	127	795.12	-0.3285	0.0378378	46.72	-70.3	1154.88
5198	127	158.53	0.0715	0.0562701	46.72	-70.3	1791.47
5199	127	-478.06	-0.1285	0.0567261	46.72	-70.3	2428.06
5200	127	-941.08	0.1145	0.052161	46.72	-70.3	2891.08
5201	127	-1230.54	0.0425	0.0586265	46.72	-70.3	3180.54
5262	129	1898.5	-0.1807	0.07431	47.29	-79.12	51.5
5263	129	1825	0.0343	0.0528701	47.29	-79.12	125
5264	129	1617.32	0.1193	0.0483425	47.29	-79.12	332.68
5265	129	1409.64	-0.0517	0.0555556	47.29	-79.12	540.36
5266	129	1201.96	0.1623	0.0403226	47.29	-79.12	748.04
5267	129	994.28	-0.1227	0.053681	47.29	-79.12	955.72
5268	129	786.6	0.0773	0.0808314	47.29	-79.12	1163.4
5269	129	578.92	0.0193	0.0510204	47.29	-79.12	1371.08
5270	129	371.24	0.0773	0.0808314	47.29	-79.12	1578.76
5271	129	163.56	-0.4087	0.0645756	47.29	-79.12	1786.44
5272	129	-44.12	0.4623	0.0592217	47.29	-79.12	1994.12
5273	129	-251.8	-0.1657	0.0525526	47.29	-79.12	2201.8
5274	129	-459.48	0.0773	0.0808314	47.29	-79.12	2409.48
5275	129	-667.16	-0.0517	0.0859951	47.29	-79.12	2617.16
5276	129	-874.84	-0.1947	0.0572831	47.29	-79.12	2824.84
5277	129	-1082.52	0.2773	0.0397276	47.29	-79.12	3032.52
5278	129	-1290.2	-0.0517	0.0471063	47.29	-79.12	3240.2
5318	130	907.47	-0.7933	0.0243224	47.5	-70.38	1042.53
5319	130	386.2	0.6217	0.0592217	47.5	-70.38	1563.8
5320	130	-135.06	0.1927	0.0649351	47.5	-70.38	2085.06
5321	130	-656.33	-0.0212	0.0380022	47.5	-70.38	2606.33
5322	130	-1177.59	0.3498	0.0502874	47.5	-70.38	3127.59
5356	131	1950	0.5719	0.033557	45.96	-73.33	0
5357	131	1892.86	1.2569	0.039818	45.96	-73.33	57.14
5358	131	1835.71	-4.6571	0.00709651	45.96	-73.33	114.29
5359	131	1778.57	-4.3571	0.00514328	45.96	-73.33	171.43
5360	131	1649.64	-1.3141	0.00491297	45.96	-73.33	300.36
5361	131	1448.91	0.1999	0.0665399	45.96	-73.33	501.09
5362	131	1252.26	-0.0431	0.0431566	45.96	-73.33	697.74
5363	131	867.11	0.0139	0.0457516	45.96	-73.33	1082.89
5364	131	481.95	0.3719	0.0458716	45.96	-73.33	1468.05
5365	131	96.79	0.2859	0.056	45.96	-73.33	1853.21
5366	131	-288.36	0.1289	0.0562701	45.96	-73.33	2238.36
5367	131	-673.52	0.3569	0.0670498	45.96	-73.33	2623.52
5368	131	-1058.67	0.4859	0.0686275	45.96	-73.33	3008.67
5421	133	-390.84	0.077	0.0539291	45.6	-84.32	2340.84
5422	133	-495.66	-0.023	0.0569106	45.6	-84.32	2445.66
5423	133	-670.35	0.02	0.0503597	45.6	-84.32	2620.35
5424	133	-845.04	-0.051	0.0548589	45.6	-84.32	2795.04
5425	133	-1019.73	-0.023	0.0523169	45.6	-84.32	2969.73
5426	133	-1194.42	-0.008	0.0533537	45.6	-84.32	3144.42
5457	134	1830.14	0.1847	0.0702811	45.07	-84.78	119.86
5458	134	1765.58	-0.3583	0.0516987	45.07	-84.78	184.42
5459	134	1710.11	0.1567	0.0948509	45.07	-84.78	239.89
5460	134	1654.63	-0.5583	0.0855746	45.07	-84.78	295.37
5461	134	1599.16	-0.5723	0.0845411	45.07	-84.78	350.84
5462	134	1543.69	-0.4293	0.0853659	45.07	-84.78	406.31
5463	134	1488.21	-0.4583	0.0879397	45.07	-84.78	461.79
5464	134	1432.74	0.2277	0.0493653	45.07	-84.78	517.26
5465	134	1377.27	-0.1723	0.0799087	45.07	-84.78	572.73
5466	134	1321.79	0.1277	0.0909091	45.07	-84.78	628.21
5467	134	1135.49	0.1847	0.0788288	45.07	-84.78	814.51
5468	134	942.57	0.0707	0.110759	45.07	-84.78	1007.43
5469	134	749.64	-0.0293	0.0453956	45.07	-84.78	1200.36
5470	134	556.71	0.1567	0.0862069	45.07	-84.78	1393.29
5471	134	363.78	0.1707	0.0586265	45.07	-84.78	1586.22
5472	134	170.85	0.1567	0.0862069	45.07	-84.78	1779.15
5473	134	-22.08	0.3567	0.0574713	45.07	-84.78	1972.08
5474	134	-215.01	0.0847	0.0431034	45.07	-84.78	2165.01
5475	134	-407.93	0.1707	0.0883838	45.07	-84.78	2357.93
5476	134	-600.86	0.0707	0.0825472	45.07	-84.78	2550.86
5477	134	-793.79	0.2137	0.0810185	45.07	-84.78	2743.79
5478	134	-986.72	0.0707	0.110759	45.07	-84.78	2936.72
5479	134	-1179.65	0.1567	0.0574713	45.07	-84.78	3129.65
5561	137	1617.31	-0.518	0.124555	48	-91.12	332.69
5562	137	1606.66	-0.133	0.0363448	48	-91.12	343.34
5563	137	1602.78	-0.233	0.0810185	48	-91.12	347.22
5566	137	1591.64	0.082	0.0458716	48	-91.12	358.36
5568	137	1579.53	-0.061	0.0347222	48	-91.12	370.47
5569	137	1574.69	-0.49	0.048011	48	-91.12	375.31
5570	137	1569.84	1.353	0.0422705	48	-91.12	380.16
5595	138	1750	-0.2753	0.175879	46.25	-89.9	200
5596	138	1000.51	-0.1033	0.0980392	46.25	-89.9	949.49
5597	138	251.02	-0.0323	0.0636364	46.25	-89.9	1698.98
5598	138	-498.46	0.4107	0.0455137	46.25	-89.9	2448.46
5599	138	-1247.95	0.1817	0.0488827	46.25	-89.9	3197.95
5623	139	1925.26	-0.0796	0.0380849	48.4	-81.32	24.74
5624	139	1702.6	-0.3086	0.0401837	48.4	-81.32	247.4
5625	139	1455.21	-0.2936	0.0397276	48.4	-81.32	494.79
5626	139	1207.81	-0.1796	0.0344828	48.4	-81.32	742.19
5627	139	960.41	0.1064	0.0673077	48.4	-81.32	989.59
5628	139	713.02	0.3204	0.0532725	48.4	-81.32	1236.98
5629	139	465.62	0.1204	0.0434783	48.4	-81.32	1484.38
5630	139	218.23	-0.4086	0.0451613	48.4	-81.32	1731.77
5631	139	-29.17	0.1204	0.0434783	48.4	-81.32	1979.17
5632	139	-276.57	-0.1516	0.0423729	48.4	-81.32	2226.57
5633	139	-523.96	0.1484	0.0673077	48.4	-81.32	2473.96
5634	139	-771.36	0.3344	0.0517751	48.4	-81.32	2721.36
5635	139	-1018.76	0.1914	0.0628366	48.4	-81.32	2968.76
5636	139	-1266.15	0.4914	0.0405562	48.4	-81.32	3216.15
5662	140	1950	0.2701	0.0333016	46	-73.22	0
5663	140	1920	-0.4449	0.0248756	46	-73.22	30
5664	140	1890	0.2701	0.0293378	46	-73.22	60
5665	140	1830	0.5411	0.0436409	46	-73.22	120
5666	140	1800	0.2271	0.0207469	46	-73.22	150
5667	140	1639.11	-0.5449	0.0218204	46	-73.22	310.89
5668	140	1317.33	0.1411	0.0388457	46	-73.22	632.67
5669	140	949.86	-0.1729	0.0443599	46	-73.22	1000.14
5670	140	536.69	0.3131	0.0400916	46	-73.22	1413.31
5671	140	123.53	0.1131	0.0466667	46	-73.22	1826.47
5672	140	-83.05	-0.2019	0.0435323	46	-73.22	2033.05
5673	140	-289.63	-0.2159	0.0507983	46	-73.22	2239.63
5674	140	-702.8	0.0981	0.0478142	46	-73.22	2652.8
5675	140	-1031.9	0.4701	0.0211353	46	-73.22	2981.9
5676	140	-1276.92	0.2701	0.0434243	46	-73.22	3226.92
5746	143	1950	0.5726	0.118243	45.05	-92.82	0
5747	143	1897.37	0.7446	0.0945946	45.05	-92.82	52.63
5748	143	1593.79	-0.1124	0.0749465	45.05	-92.82	356.21
5749	143	1485.63	-0.1414	0.0859951	45.05	-92.82	464.37
5750	143	1269.3	-0.3414	0.150862	45.05	-92.82	680.7
5751	143	1052.98	-0.0554	0.147059	45.05	-92.82	897.02
5752	143	674.41	0.4306	0.106707	45.05	-92.82	1275.59
5753	143	241.76	-0.0124	0.108359	45.05	-92.82	1708.24
5754	143	-418.82	0.3306	0.0702811	45.05	-92.82	2368.82
5755	143	-851.87	-0.0984	0.0899743	45.05	-92.82	2801.87
5776	144	1925	0.0437	0.0458115	47.28	-93.6	25
5777	144	1620.83	-0.1562	0.0338491	47.28	-93.6	329.17
5778	144	1238.89	-0.5702	0.0471063	47.28	-93.6	711.11
5779	144	856.94	0.2727	0.0254916	47.28	-93.6	1093.06
5780	144	665.97	-0.2703	0.0469169	47.28	-93.6	1284.03
5781	144	570.48	-0.5702	0.0471063	47.28	-93.6	1379.52
5782	144	475	0.8727	0.0404624	47.28	-93.6	1475
5783	144	379.51	0.0588	0.0508721	47.28	-93.6	1570.49
5784	144	284.02	0.1728	0.0362694	47.28	-93.6	1665.98
5785	144	93.05	-0.0413	0.0516224	47.28	-93.6	1856.95
5786	144	-267.1	0.1297	0.0391937	47.28	-93.6	2217.1
5787	144	-627.25	0.0007	0.0448718	47.28	-93.6	2577.25
5788	144	-987.4	0.1007	0.0533537	47.28	-93.6	2937.4
5864	146	1950	0.6787	0.0862069	45.28	-91.48	0
5865	146	1939.85	0.6787	0.0862069	45.28	-91.48	10.15
5866	146	1929.71	0.9937	0.116667	45.28	-91.48	20.29
5867	146	1919.56	0.8507	0.0918635	45.28	-91.48	30.44
5868	146	1909.41	0.6647	0.0859951	45.28	-91.48	40.59
5869	146	1899.26	0.6217	0.0349301	45.28	-91.48	50.74
5870	146	1889.12	0.0787	0.039019	45.28	-91.48	60.88
5871	146	1878.97	0.0787	0.039019	45.28	-91.48	71.03
5872	146	1868.82	0.3507	0.0546022	45.28	-91.48	81.18
5873	146	1858.68	0.2647	0.035824	45.28	-91.48	91.32
5874	146	1848.53	0.2217	0.0652985	45.28	-91.48	101.47
5875	146	1838.38	-0.0633	0.0439698	45.28	-91.48	111.62
5876	146	1828.24	-0.5493	0.1	45.28	-91.48	121.76
5877	146	1818.09	-0.4783	0.0693069	45.28	-91.48	131.91
5878	146	1807.94	-0.5923	0.091623	45.28	-91.48	142.06
5879	146	1797.79	0.0077	0.0523952	45.28	-91.48	152.21
5880	146	1787.65	0.4367	0.0408879	45.28	-91.48	162.35
5881	146	1777.5	0.1217	0.0472335	45.28	-91.48	172.5
5882	146	1767.35	-0.0493	0.0306748	45.28	-91.48	182.65
5883	146	1757.21	0.1217	0.0342131	45.28	-91.48	192.79
5884	146	1747.06	0.1217	0.03305	45.28	-91.48	202.94
5885	146	1706.47	0.4077	0.0648148	45.28	-91.48	243.53
5886	146	1665.88	-0.0923	0.0473613	45.28	-91.48	284.12
5887	146	1625.29	-0.5353	0.175879	45.28	-91.48	324.71
5888	146	1584.71	-0.1633	0.0738397	45.28	-91.48	365.29
5889	146	1544.12	0.2647	0.208333	45.28	-91.48	405.88
5890	146	1503.53	0.0507	0.0892857	45.28	-91.48	446.47
5891	146	1462.94	0.2217	0.353535	45.28	-91.48	487.06
5892	146	1422.35	-0.1353	0.0496454	45.28	-91.48	527.65
5893	146	1381.76	-0.0783	0.0364583	45.28	-91.48	568.24
5894	146	1341.18	-0.0633	0.0422195	45.28	-91.48	608.82
5895	146	1300.59	-0.1923	0.0565428	45.28	-91.48	649.41
5896	146	1260	0.1937	0.0643382	45.28	-91.48	690
6053	150	1830	-0.4118	0.0558214	45.99	-73.3	120
6054	150	1527.52	-0.0688	0.0708502	45.99	-73.3	422.48
6055	150	975.89	-0.0398	0.0892857	45.99	-73.3	974.11
6056	150	357.62	0.0172	0.150215	45.99	-73.3	1592.38
6057	150	-260.66	0.1032	0.16129	45.99	-73.3	2210.66
6058	150	-878.93	-0.0118	0.0853659	45.99	-73.3	2828.93
6059	150	-1247.65	-0.4538	0.0462351	45.99	-73.3	3197.65
6079	151	1950	-1.1166	0.0189394	45.99	-73.3	0
6080	151	1806	-0.1166	0.0385888	45.99	-73.3	144
6081	151	1357.66	0.0684	0.0570962	45.99	-73.3	592.34
6082	151	807.87	-0.4026	0.0210716	45.99	-73.3	1142.13
6083	151	231.03	-0.0886	0.0481431	45.99	-73.3	1718.97
6084	151	-372.86	0.2254	0.176768	45.99	-73.3	2322.86
6085	151	-976.76	0.1974	0.0570033	45.99	-73.3	2926.76
6133	153	1950	0.8547	0.0228162	40.48	-75.67	0
6134	153	1866.67	2.0267	0.0143914	40.48	-75.67	83.33
6135	153	1783.33	-0.6733	0.0219711	40.48	-75.67	166.67
6136	153	1514.34	-0.4313	0.0178389	40.48	-75.67	435.66
6137	153	1121.58	-0.6733	0.0219711	40.48	-75.67	828.42
6138	153	728.82	0.2267	0.0214329	40.48	-75.67	1221.18
6139	153	336.05	0.2267	0.0214329	40.48	-75.67	1613.95
6140	153	-56.71	-0.2733	0.0296108	40.48	-75.67	2006.71
6141	153	-449.47	-0.5163	0.0162338	40.48	-75.67	2399.47
6142	153	-842.24	1.4407	0.0163094	40.48	-75.67	2792.24
6143	153	-1235	-0.3163	0.0168108	40.48	-75.67	3185
6185	154	1950	0.1083	0.131579	46.72	-87.97	0
6186	154	1830	0.1223	0.117845	46.72	-87.97	120
6187	154	1590.32	-0.0057	0.165094	46.72	-87.97	359.68
6188	154	1190.86	-0.1917	0.0899743	46.72	-87.97	759.14
6189	154	791.39	0.0363	0.165094	46.72	-87.97	1158.61
6190	154	391.93	-0.0487	0.135135	46.72	-87.97	1558.07
6191	154	-7.54	-0.0207	0.156951	46.72	-87.97	1957.54
6192	154	-407	0.0363	0.116279	46.72	-87.97	2357
6193	154	-806.46	0.1943	0.0492264	46.72	-87.97	2756.46
6194	154	-1167.69	0.1943	0.0368034	46.72	-87.97	3117.69
6249	156	1916.67	-0.802	0.0207469	47.6	-70.98	33.33
6250	156	1866.67	-1.045	0.0252161	47.6	-70.98	83.33
6251	156	1472.28	-0.645	0.0232868	47.6	-70.98	477.72
6252	156	1094.57	-0.117	0.0216049	47.6	-70.98	855.43
6253	156	527.99	-0.317	0.0227716	47.6	-70.98	1422.01
6254	156	150.28	0.155	0.0250537	47.6	-70.98	1799.72
6255	156	-227.44	0.383	0.0248756	47.6	-70.98	2177.44
6256	156	-794.01	0.541	0.0598291	47.6	-70.98	2744.01
6257	156	-1171.73	0.741	0.0203963	47.6	-70.98	3121.73
6270	157	1919.7	0.1523	0.0338819	43.22	-80.66	30.3
6271	157	1874.24	-0.2907	0.0475543	43.22	-80.66	75.76
6272	157	1680.14	-0.0047	0.0324675	43.22	-80.66	269.86
6273	157	1397.04	-0.0907	0.0374332	43.22	-80.66	552.96
6274	157	1113.94	-0.0047	0.0324675	43.22	-80.66	836.06
6275	157	830.85	-0.0907	0.0374332	43.22	-80.66	1119.15
6276	157	547.75	-0.0907	0.0374332	43.22	-80.66	1402.25
6277	157	264.65	-0.0047	0.0324675	43.22	-80.66	1685.35
6278	157	-18.45	0.3813	0.0348606	43.22	-80.66	1968.45
6279	157	-301.55	-0.0907	0.0374332	43.22	-80.66	2251.55
6280	157	-867.75	-0.0047	0.0324675	43.22	-80.66	2817.75
6281	157	-1150.84	0.1953	0.0377562	43.22	-80.66	3100.84
6324	158	1900	-0.2632	0.0279553	47.08	-71.42	50
6325	158	1850	-0.4202	0.0381264	47.08	-71.42	100
6326	158	1800	-0.2772	0.0367261	47.08	-71.42	150
6327	158	1750	0.2508	0.0784753	47.08	-71.42	200
6328	158	1093.21	-0.3342	0.0299145	47.08	-71.42	856.79
6329	158	436.42	-0.0912	0.0358607	47.08	-71.42	1513.58
6330	158	-220.37	0.1088	0.0598291	47.08	-71.42	2170.37
6331	158	-877.16	0.0658	0.0567261	47.08	-71.42	2827.16
6371	159	1943.33	-0.7588	0.0333333	47.18	-94.93	6.67
6372	159	1883.33	-0.1868	0.0508721	47.18	-94.93	66.67
6373	159	1777.43	0.2132	0.101156	47.18	-94.93	172.57
6374	159	1632.28	0.1132	0.208333	47.18	-94.93	317.72
6375	159	1487.13	0.1132	0.208333	47.18	-94.93	462.87
6376	159	1341.99	-0.0728	0.0757576	47.18	-94.93	608.01
6377	159	1196.84	0.1132	0.208333	47.18	-94.93	753.16
6378	159	1051.69	-0.1298	0.0675676	47.18	-94.93	898.31
6379	159	833.97	0.1132	0.208333	47.18	-94.93	1116.03
6380	159	543.68	-0.4008	0.0529501	47.18	-94.93	1406.32
6381	159	253.39	0.1132	0.0966851	47.18	-94.93	1696.61
6382	159	-36.9	-0.3158	0.0527108	47.18	-94.93	1986.9
6383	159	-327.2	-0.0158	0.225806	47.18	-94.93	2277.2
6384	159	-472.34	0.0992	0.118243	47.18	-94.93	2422.34
6385	159	-690.06	0.2702	0.0654206	47.18	-94.93	2640.06
6386	159	-1074.04	-0.0438	0.172414	47.18	-94.93	3024.04
6448	161	1967.24	-0.3254	0.0601375	41.78	-71.43	-17.24
6449	161	1956.22	0.0316	0.0752688	41.78	-71.43	-6.22
6450	161	1945.2	-0.0394	0.0574713	41.78	-71.43	4.8
6451	161	1934.18	-0.0824	0.0632911	41.78	-71.43	15.82
6452	161	1923.16	0.0746	0.0704225	41.78	-71.43	26.84
6453	161	1912.14	0.0746	0.0432099	41.78	-71.43	37.86
6454	161	1901.12	0.2316	0.0472973	41.78	-71.43	48.88
6455	161	1890.1	-0.2254	0.0357143	41.78	-71.43	59.9
6456	161	1879.08	0.0316	0.0472973	41.78	-71.43	70.92
6457	161	1868.06	0.0036	0.0464191	41.78	-71.43	81.94
6458	161	1857.04	0.0746	0.0454545	41.78	-71.43	92.96
6459	161	1846.02	-0.2394	0.0883838	41.78	-71.43	103.98
6460	161	1835	-0.1964	0.0839329	41.78	-71.43	115
6461	161	1823.98	-0.0824	0.0839329	41.78	-71.43	126.02
6462	161	1812.96	0.1176	0.0471698	41.78	-71.43	137.04
6463	161	1801.94	-0.1964	0.0839329	41.78	-71.43	148.06
6464	161	1790.92	-0.2534	0.0841346	41.78	-71.43	159.08
6465	161	1779.9	0.0896	0.0478142	41.78	-71.43	170.1
6466	161	1768.88	-0.2104	0.0877193	41.78	-71.43	181.12
6467	161	1757.86	-0.6824	0.0289735	41.78	-71.43	192.14
6468	161	1746.84	-0.3534	0.0530303	41.78	-71.43	203.16
6469	161	1741.33	-0.0534	0.0774336	41.78	-71.43	208.67
6470	161	1724.8	0.0316	0.0752688	41.78	-71.43	225.2
6471	161	1713.78	0.0316	0.0752688	41.78	-71.43	236.22
6472	161	1702.76	-0.0534	0.0670498	41.78	-71.43	247.24
6473	161	1590.13	-0.0964	0.0727651	41.78	-71.43	359.87
6474	161	1443.63	0.0746	0.0704225	41.78	-71.43	506.37
6475	161	1297.13	0.0606	0.0714286	41.78	-71.43	652.87
6476	161	1150.63	-0.0964	0.062167	41.78	-71.43	799.37
6477	161	1004.13	0.0896	0.0784753	41.78	-71.43	945.87
6478	161	857.63	0.0746	0.0704225	41.78	-71.43	1092.37
6479	161	711.13	0.0606	0.0714286	41.78	-71.43	1238.87
6480	161	564.63	0.0896	0.0784753	41.78	-71.43	1385.37
6481	161	418.13	0.0466	0.0693069	41.78	-71.43	1531.87
6482	161	271.63	0.0606	0.0714286	41.78	-71.43	1678.37
6483	161	125.13	-0.1254	0.0684932	41.78	-71.43	1824.87
6484	161	-21.37	-0.0534	0.0670498	41.78	-71.43	1971.37
6485	161	-167.87	-0.0534	0.0670498	41.78	-71.43	2117.87
6486	161	-314.37	0.0606	0.0714286	41.78	-71.43	2264.37
6487	161	-460.87	0.1466	0.0518519	41.78	-71.43	2410.87
6488	161	-607.37	-0.0964	0.0614035	41.78	-71.43	2557.37
6489	161	-753.87	0.0466	0.0693069	41.78	-71.43	2703.87
6490	161	-900.37	0.1896	0.056	41.78	-71.43	2850.37
6491	161	-1046.87	-0.0824	0.0632911	41.78	-71.43	2996.87
6492	161	-1193.37	0.1896	0.056	41.78	-71.43	3143.37
6499	162	1642.08	-0.2165	0.0469799	46.79	-72.84	307.92
6500	162	1255.19	-0.0165	0.0443038	46.79	-72.84	694.81
6501	162	868.31	0.1405	0.0581395	46.79	-72.84	1081.69
6502	162	610.39	-0.2165	0.0628366	46.79	-72.84	1339.61
6503	162	-34.42	-0.1595	0.0342466	46.79	-72.84	1984.42
6504	162	-679.22	0.4685	0.0938338	46.79	-72.84	2629.22
6553	164	1950	0.0626	0.0526316	44.82	-97.35	0
6554	164	1935.08	0.1476	0.0427873	44.82	-97.35	14.92
6555	164	1920.16	0.0626	0.0526316	44.82	-97.35	29.84
6556	164	1905.24	0.2046	0.0458716	44.82	-97.35	44.76
6557	164	1890.32	0.3196	0.0452196	44.82	-97.35	59.68
6558	164	1875.4	-0.6234	0.0649351	44.82	-97.35	74.6
6559	164	1856.75	0.0476	0.0530303	44.82	-97.35	93.25
6560	164	1841.83	0.3336	0.0390625	44.82	-97.35	108.17
6561	164	1786.97	0.0476	0.0530303	44.82	-97.35	163.03
6562	164	1668.18	-0.1234	0.0288779	44.82	-97.35	281.82
6563	164	1593.94	-0.0954	0.0340136	44.82	-97.35	356.06
6564	164	1534.54	-0.3804	0.0326797	44.82	-97.35	415.46
6565	164	1408.33	-0.1524	0.0389755	44.82	-97.35	541.67
6566	164	1296.96	0.1336	0.0532725	44.82	-97.35	653.04
6567	164	1163.32	-0.1234	0.0394144	44.82	-97.35	786.68
6568	164	1044.53	-0.1234	0.0394144	44.82	-97.35	905.47
6569	164	925.74	0.1196	0.0350701	44.82	-97.35	1024.26
6570	164	851.49	-0.1094	0.0391499	44.82	-97.35	1098.51
6571	164	792.1	-0.1094	0.0391499	44.82	-97.35	1157.9
6572	164	673.31	0.4046	0.028363	44.82	-97.35	1276.69
6573	164	396.96	0.2766	0.0467914	44.82	-97.35	1553.04
6574	164	60.75	0.0626	0.0526316	44.82	-97.35	1889.25
6575	164	-238.1	-0.2954	0.0341797	44.82	-97.35	2188.1
6576	164	-536.96	-0.0234	0.0391499	44.82	-97.35	2486.96
6577	164	-723.74	0.3476	0.0458115	44.82	-97.35	2673.74
6578	164	-873.17	0.1906	0.044757	44.82	-97.35	2823.17
6579	164	-1172.02	0.1626	0.0555556	44.82	-97.35	3122.02
6616	165	1859.38	0.429	0.0961538	43.1	-89.42	90.62
6617	165	1839.46	0.086	0.072314	43.1	-89.42	110.54
6618	165	1839.3	-0.443	0.213415	43.1	-89.42	110.7
6619	165	1531.14	-0.143	0.0759219	43.1	-89.42	418.86
6620	165	1222.99	-0.243	0.101744	43.1	-89.42	727.01
6621	165	914.84	-0.157	0.0793651	43.1	-89.42	1035.16
6622	165	-9.62	-0.043	0.0637523	43.1	-89.42	1959.62
6623	165	-256.84	0.057	0.0855746	43.1	-89.42	2206.84
6624	165	-371.6	-0.043	0.0670498	43.1	-89.42	2321.6
6625	165	-486.37	0.472	0.0918635	43.1	-89.42	2436.37
6626	165	-715.9	0.1	0.0868486	43.1	-89.42	2665.9
6627	165	-1174.96	0.343	0.0956284	43.1	-89.42	3124.96
6650	166	1872.5	0.471	0.109375	43.1	-89.42	77.5
6651	166	811.54	0.143	0.0938338	43.1	-89.42	1138.46
6652	166	-94.2	-0.143	0.143443	43.1	-89.42	2044.2
6674	167	1927.27	0.6906	0.0493653	45.4	-75.51	22.73
6675	167	1671.46	-0.0814	0.0676983	45.4	-75.51	278.54
6676	167	1448.28	-0.2954	0.0715746	45.4	-75.51	501.72
6677	167	1001.93	0.3766	0.035533	45.4	-75.51	948.07
6678	167	778.76	0.3336	0.0560897	45.4	-75.51	1171.24
6679	167	555.58	-0.3234	0.101449	45.4	-75.51	1394.42
6680	167	109.23	0.2336	0.0548589	45.4	-75.51	1840.77
6681	167	-113.95	0.2616	0.0879397	45.4	-75.51	2063.95
6682	167	-337.12	-0.3234	0.109718	45.4	-75.51	2287.12
6683	167	-783.48	-0.1814	0.0928382	45.4	-75.51	2733.48
6684	167	-1229.83	0.0616	0.0491573	45.4	-75.51	3179.83
6705	169	1750	0.0428	0.0388027	41.82	-73.28	200
6706	169	1370.04	0.0858	0.0371945	41.82	-73.28	579.96
6707	169	1037.58	0.0858	0.0371945	41.82	-73.28	912.42
6708	169	800.11	0.0858	0.0371945	41.82	-73.28	1149.89
6709	169	515.14	0.0858	0.0371945	41.82	-73.28	1434.86
6710	169	37.59	-0.8572	0.0426309	41.82	-73.28	1912.41
6711	169	-167.29	0.0858	0.0371945	41.82	-73.28	2117.29
6712	169	-577.05	0.2428	0.0341463	41.82	-73.28	2527.05
6713	169	-982.95	0.1428	0.0366492	41.82	-73.28	2932.95
6714	169	-1157.05	0.2288	0.0386313	41.82	-73.28	3107.05
6790	171	1816.67	-1.002	0.0301724	47.91	-71.18	133.33
6791	171	1633.35	-0.216	0.0227273	47.91	-71.18	316.65
6792	171	1400.04	-0.845	0.0271318	47.91	-71.18	549.96
6793	171	1166.74	0.727	0.0290456	47.91	-71.18	783.26
6794	171	933.43	-0.302	0.0240715	47.91	-71.18	1016.57
6795	171	700.12	-0.416	0.022537	47.91	-71.18	1249.88
6796	171	233.51	-0.216	0.0227273	47.91	-71.18	1716.49
6797	171	-233.1	0.598	0.0286182	47.91	-71.18	2183.1
6798	171	-699.71	0.67	0.0294613	47.91	-71.18	2649.71
6799	171	-1166.32	0.927	0.0264151	47.91	-71.18	3116.32
6823	172	1698.11	0.3181	0.0730689	45.36	-72.58	251.89
6824	172	1542.45	0.1471	0.0405562	45.36	-72.58	407.55
6825	172	1386.79	0.3331	0.0510204	45.36	-72.58	563.21
6826	172	1231.12	0.2471	0.0434783	45.36	-72.58	718.88
6827	172	1075.46	0.6041	0.0466667	45.36	-72.58	874.54
6828	172	878.54	0.6611	0.0406977	45.36	-72.58	1071.46
6829	172	733.51	0.6331	0.0458716	45.36	-72.58	1216.49
6830	172	588.49	0.2041	0.0410798	45.36	-72.58	1361.51
6831	172	395.12	-5.7959	0.0180505	45.36	-72.58	1554.88
6832	172	250.09	0.6751	0.0452196	45.36	-72.58	1699.91
6833	172	105.06	0.4181	0.0548589	45.36	-72.58	1844.94
6834	172	-88.31	0.3331	0.0433705	45.36	-72.58	2038.31
6835	172	-233.34	0.6471	0.0446429	45.36	-72.58	2183.34
6836	172	-805.89	0.5751	0.0411281	45.36	-72.58	2755.89
7037	176	1922	-0.2434	0.0394144	47.98	-93.38	28
7038	176	1906	-0.2854	0.038674	47.98	-93.38	44
7039	176	1866	-0.6144	0.0441362	47.98	-93.38	84
7040	176	1698.14	-0.1574	0.0451031	47.98	-93.38	251.86
7041	176	1498.82	-0.6144	0.0441362	47.98	-93.38	451.18
7042	176	1365.94	-0.1574	0.0451031	47.98	-93.38	584.06
7043	176	1233.07	-0.1284	0.0428397	47.98	-93.38	716.93
7044	176	1138.15	-0.6004	0.0426829	47.98	-93.38	811.85
7045	176	1090.7	-0.2714	0.0413223	47.98	-93.38	859.3
7046	176	995.78	0.1146	0.0458716	47.98	-93.38	954.22
7047	176	805.96	-0.3284	0.0383772	47.98	-93.38	1144.04
7048	176	616.13	-0.2714	0.0392817	47.98	-93.38	1333.87
7049	176	426.31	0.3716	0.0507246	47.98	-93.38	1523.69
7050	176	189.02	0.3286	0.0474255	47.98	-93.38	1760.98
7051	176	46.65	0.1286	0.0439698	47.98	-93.38	1903.35
7052	176	-162.15	0.3146	0.0361197	47.98	-93.38	2112.15
7053	176	-333	0.3716	0.0507246	47.98	-93.38	2283
7054	176	-427.91	0.1426	0.0297619	47.98	-93.38	2377.91
7055	176	-494.35	-0.2144	0.0413223	47.98	-93.38	2444.35
7056	176	-589.26	-0.2714	0.0392817	47.98	-93.38	2539.26
7057	176	-712.65	0.5286	0.0378788	47.98	-93.38	2662.65
7058	176	-807.56	0.7146	0.0415184	47.98	-93.38	2757.56
7059	176	-1074.08	0.8426	0.0328638	47.98	-93.38	3024.08
7236	182	1930.34	0.1197	0.0529501	46.6	-81.5	19.66
7237	182	1714.11	0.1197	0.0529501	46.6	-81.5	235.89
7238	182	1556.84	0.1487	0.0547731	46.6	-81.5	393.16
7239	182	1360.26	-0.1373	0.077951	46.6	-81.5	589.74
7240	182	1163.68	-0.1373	0.077951	46.6	-81.5	786.32
7241	182	967.1	0.1197	0.0529501	46.6	-81.5	982.9
7242	182	770.53	-0.0653	0.0829384	46.6	-81.5	1179.47
7243	182	573.95	-0.1653	0.0759219	46.6	-81.5	1376.05
7244	182	377.37	-0.0803	0.0813953	46.6	-81.5	1572.63
7245	182	180.79	0.2487	0.0460526	46.6	-81.5	1769.21
7246	182	-15.79	-0.1373	0.077951	46.6	-81.5	1965.79
7247	182	-212.37	0.1917	0.0436409	46.6	-81.5	2162.37
7248	182	-408.95	-0.1083	0.0806452	46.6	-81.5	2358.95
7249	182	-605.53	-0.1373	0.077951	46.6	-81.5	2555.53
7250	182	-802.11	0.2487	0.0456323	46.6	-81.5	2752.11
7251	182	-939.71	-0.1083	0.0806452	46.6	-81.5	2889.71
7252	182	-1195.27	0.4487	0.0415677	46.6	-81.5	3145.27
7318	185	1950	0.3853	0.0735294	46.45	-79.47	0
7319	185	1880	-0.1147	0.0455729	46.45	-79.47	70
7320	185	1480.7	-0.0717	0.0757576	46.45	-79.47	469.3
7321	185	682.11	-0.1287	0.0456323	46.45	-79.47	1267.89
7322	185	-316.13	0.2003	0.108025	46.45	-79.47	2266.13
7323	185	-1114.72	0.1853	0.110063	46.45	-79.47	3064.72
7336	186	1930	-0.1742	0.0439698	42.65	-73.05	20
7337	186	1592.77	-0.0172	0.0347567	42.65	-73.05	357.23
7338	186	556.61	-0.1312	0.0307287	42.65	-73.05	1393.39
7339	186	3.83	-0.1312	0.0307287	42.65	-73.05	1946.17
7340	186	-493.27	0.1398	0.0373134	42.65	-73.05	2443.27
7341	186	-945.18	0.1398	0.0373134	42.65	-73.05	2895.18
7428	189	1945	0.3395	0.106061	43.33	-95.2	5
7429	189	1937.5	0.2825	0.147059	43.33	-95.2	12.5
7430	189	1925	0.3685	0.114379	43.33	-95.2	25
7431	189	1912.5	-0.1605	0.0460526	43.33	-95.2	37.5
7432	189	1900	0.3965	0.0868486	43.33	-95.2	50
7433	189	1887.5	0.5255	0.0802752	43.33	-95.2	62.5
7434	189	1875	0.2965	0.0399543	43.33	-95.2	75
7435	189	1862.5	-0.5605	0.0279553	43.33	-95.2	87.5
7436	189	1850	-0.1745	0.0352823	43.33	-95.2	100
7437	189	1698.57	-0.4315	0.0318182	43.33	-95.2	251.43
7438	189	1547.14	0.5255	0.0802752	43.33	-95.2	402.86
7439	189	1433.57	0.4685	0.0813953	43.33	-95.2	516.43
7440	189	1357.86	-0.0895	0.0324675	43.33	-95.2	592.14
7441	189	1289.71	-0.4035	0.0293378	43.33	-95.2	660.29
7442	189	1130.71	-0.3315	0.027408	43.33	-95.2	819.29
7443	189	1055	-0.2315	0.0267994	43.33	-95.2	895
7444	189	943.3	-0.0895	0.0324675	43.33	-95.2	1006.7
7445	189	795.63	-0.2895	0.0284784	43.33	-95.2	1154.37
7446	189	647.96	0.0395	0.0320513	43.33	-95.2	1302.04
7447	189	500.28	0.1255	0.0298126	43.33	-95.2	1449.72
7448	189	352.61	-0.0895	0.0324675	43.33	-95.2	1597.39
7449	189	204.93	0.2825	0.0298635	43.33	-95.2	1745.07
7450	189	57.26	0.4685	0.0813953	43.33	-95.2	1892.74
7451	189	-90.41	0.1105	0.0310835	43.33	-95.2	2040.41
7452	189	-238.09	-0.0895	0.0324675	43.33	-95.2	2188.09
7453	189	-385.76	0.5105	0.0784753	43.33	-95.2	2335.76
7454	189	-533.44	0.1255	0.0298126	43.33	-95.2	2483.44
7455	189	-681.11	0.4685	0.0813953	43.33	-95.2	2631.11
7456	189	-828.78	-1.0315	0.0261194	43.33	-95.2	2778.78
7457	189	-943.94	-0.3315	0.0375536	43.33	-95.2	2893.94
7458	189	-1026.57	0.2825	0.0298635	43.33	-95.2	2976.57
7459	189	-1109.2	0.5685	0.0980392	43.33	-95.2	3059.2
7460	189	-1191.84	-1.5745	0.0282714	43.33	-95.2	3141.84
7461	189	-1274.47	-0.5605	0.0269438	43.33	-95.2	3224.47
7562	191	1965	-0.0114	0.0564516	46.35	-94.4	-15
7563	191	1945.72	-0.3694	0.0679612	46.35	-94.4	4.28
7564	191	1916.79	-0.3834	0.0679612	46.35	-94.4	33.21
7565	191	1897.51	-0.2404	0.0782998	46.35	-94.4	52.49
7566	191	1887.87	-0.5404	0.091623	46.35	-94.4	62.13
7567	191	1868.59	-0.5114	0.077951	46.35	-94.4	81.41
7568	191	1839.66	-0.7114	0.0568182	46.35	-94.4	110.34
7569	191	1820.38	-0.9114	0.0469169	46.35	-94.4	129.62
7570	191	1761.17	-0.8834	0.0806452	46.35	-94.4	188.83
7571	191	1731.57	-0.6404	0.0845411	46.35	-94.4	218.43
7572	191	1672.36	-0.8974	0.0467914	46.35	-94.4	277.64
7573	191	1613.15	-0.2974	0.0639854	46.35	-94.4	336.85
7574	191	1583.54	-0.6694	0.053681	46.35	-94.4	366.46
7575	191	1524.34	-0.2404	0.060241	46.35	-94.4	425.66
7576	191	1465.13	-0.6404	0.0519288	46.35	-94.4	484.87
7577	191	1435.52	-0.3114	0.0702811	46.35	-94.4	514.48
7578	191	1376.31	-0.1264	0.0680934	46.35	-94.4	573.69
7579	191	1317.1	0.0456	0.0641026	46.35	-94.4	632.9
7580	191	1287.5	0.0456	0.0620567	46.35	-94.4	662.5
7581	191	1228.29	0.1456	0.0552923	46.35	-94.4	721.71
7582	191	1169.08	-0.1404	0.0547731	46.35	-94.4	780.92
7583	191	1139.48	0.2306	0.0475543	46.35	-94.4	810.52
7584	191	1080.27	0.5166	0.0788288	46.35	-94.4	869.73
7585	191	1021.06	0.9026	0.0452196	46.35	-94.4	928.94
7586	191	932.25	0.5026	0.0519288	46.35	-94.4	1017.75
7587	191	873.04	0.6166	0.0329877	46.35	-94.4	1076.96
7588	191	843.43	0.1026	0.0388457	46.35	-94.4	1106.57
7589	191	784.22	0.4886	0.124555	46.35	-94.4	1165.78
7590	191	725.02	0.1166	0.0741525	46.35	-94.4	1224.98
7591	191	636.2	0.0026	0.0484094	46.35	-94.4	1313.8
7592	191	576.99	0.3736	0.039818	46.35	-94.4	1373.01
7593	191	488.18	-0.1264	0.0535988	46.35	-94.4	1461.82
7594	192	1950	0.9403	0.0212508	40.8	-77.42	0
7595	192	1861.76	-1.0877	0.01983	40.8	-77.42	88.24
7596	192	1773.53	-0.9457	0.0237449	40.8	-77.42	176.47
7597	192	1685.29	-0.7167	0.0244927	40.8	-77.42	264.71
7598	192	1410.24	0.3403	0.0284553	40.8	-77.42	539.76
7599	192	611.06	-0.0877	0.0296108	40.8	-77.42	1338.94
7600	192	211.46	0.2973	0.0293871	40.8	-77.42	1738.54
7601	192	-188.13	-0.0877	0.0296108	40.8	-77.42	2138.13
7603	192	-987.32	0.2543	0.0303819	40.8	-77.42	2937.32
7632	194	1966.82	-0.1928	0.0945946	41.52	-71.45	-16.82
7633	194	1954.12	-0.2498	0.0841346	41.52	-71.45	-4.12
7634	194	1941.41	-0.0788	0.0839329	41.52	-71.45	8.59
7635	194	1928.71	-0.1218	0.0879397	41.52	-71.45	21.29
7636	194	1916	0.0072	0.0777778	41.52	-71.45	34
7637	194	1903.29	-0.1218	0.0879397	41.52	-71.45	46.71
7638	194	1890.59	-0.0928	0.0727651	41.52	-71.45	59.41
7639	194	1877.88	-0.0928	0.0977654	41.52	-71.45	72.12
7640	194	1865.18	-0.0358	0.0831354	41.52	-71.45	84.82
7641	194	1852.47	-0.2218	0.110063	41.52	-71.45	97.53
7642	194	1839.76	0.0352	0.0752688	41.52	-71.45	110.24
7643	194	1833.41	0.1072	0.0645756	41.52	-71.45	116.59
7644	194	1827.06	0.0642	0.0570033	41.52	-71.45	122.94
7645	194	1820.71	-0.1358	0.0661626	41.52	-71.45	129.29
7646	194	1814.35	0.1072	0.0645756	41.52	-71.45	135.65
7647	194	1801.65	-0.0648	0.0762527	41.52	-71.45	148.35
7648	194	1795.29	-0.2218	0.0870647	41.52	-71.45	154.71
7649	194	1782.59	-0.0358	0.0793651	41.52	-71.45	167.41
7650	194	1769.88	-0.1788	0.0918635	41.52	-71.45	180.12
7651	194	1757.18	-0.0648	0.0762527	41.52	-71.45	192.82
7652	194	1744.47	-0.0218	0.0835322	41.52	-71.45	205.53
7653	194	1731.76	0.0642	0.0945946	41.52	-71.45	218.24
7654	194	1719.06	0.0932	0.0784753	41.52	-71.45	230.94
7655	194	1706.35	-0.0928	0.0727651	41.52	-71.45	243.65
7656	194	1682.35	-0.0928	0.0727651	41.52	-71.45	267.65
7657	194	1647.04	-0.0928	0.0727651	41.52	-71.45	302.96
7658	194	1611.74	-0.0788	0.0741525	41.52	-71.45	338.26
7659	194	1576.43	-0.2928	0.0448718	41.52	-71.45	373.57
7660	194	1541.13	0.0642	0.0714286	41.52	-71.45	408.87
7661	194	1505.82	-0.1218	0.0684932	41.52	-71.45	444.18
7662	194	1470.52	-0.0648	0.0762527	41.52	-71.45	479.48
7663	194	1435.21	-0.1358	0.0661626	41.52	-71.45	514.79
7664	194	1399.91	0.0642	0.0714286	41.52	-71.45	550.09
7665	194	1364.61	0.0932	0.0784753	41.52	-71.45	585.39
7666	194	1346.95	0.0072	0.0741525	41.52	-71.45	603.05
7667	194	1294	-0.0928	0.0727651	41.52	-71.45	656
7668	194	1258.69	0.0642	0.0714286	41.52	-71.45	691.31
7669	194	1223.39	-0.0928	0.0727651	41.52	-71.45	726.61
7670	194	1184.31	0.0642	0.0714286	41.52	-71.45	765.69
7671	194	1143.98	0.0642	0.0714286	41.52	-71.45	806.02
7672	194	1123.82	0.0932	0.0784753	41.52	-71.45	826.18
7673	194	1063.32	0.0932	0.0784753	41.52	-71.45	886.68
7674	194	1022.99	0.0212	0.0645756	41.52	-71.45	927.01
7675	194	982.66	0.0932	0.0784753	41.52	-71.45	967.34
7676	194	942.34	0.0502	0.0849515	41.52	-71.45	1007.66
7677	194	902.01	0.0932	0.0784753	41.52	-71.45	1047.99
7678	194	861.68	0.0212	0.0767544	41.52	-71.45	1088.32
7679	194	821.35	0.0642	0.0714286	41.52	-71.45	1128.65
7680	194	781.02	0.0072	0.062167	41.52	-71.45	1168.98
7681	194	740.69	0.0642	0.0714286	41.52	-71.45	1209.31
7726	196	1950	1.0055	0.0358974	45.5	-97.33	0
7727	196	1925	0.6335	0.0391061	45.5	-97.33	25
7728	196	1900	0.3485	0.0702811	45.5	-97.33	50
7729	196	1875	-0.0375	0.0333016	45.5	-97.33	75
7730	196	1850	-0.2375	0.0291667	45.5	-97.33	100
7731	196	1466.4	-0.2515	0.0382096	45.5	-97.33	483.6
7732	196	1082.8	0.4625	0.0292642	45.5	-97.33	867.2
7733	196	699.2	0.7765	0.0277778	45.5	-97.33	1250.8
7734	196	315.59	0.4625	0.0283401	45.5	-97.33	1634.41
7735	196	-68.01	0.1195	0.0244755	45.5	-97.33	2018.01
7736	196	-451.61	-0.0375	0.0323176	45.5	-97.33	2401.61
7737	196	-835.21	-0.7375	0.0459921	45.5	-97.33	2785.21
7738	196	-1021.19	-0.7945	0.0425791	45.5	-97.33	2971.19
7739	196	-1207.16	0.0765	0.0291667	45.5	-97.33	3157.16
7831	198	1607.66	-0.3073	0.0158014	42.16	-93.9	342.34
7832	198	1265.31	0.7647	0.0151581	42.16	-93.9	684.69
7833	198	922.97	-0.2503	0.0161738	42.16	-93.9	1027.03
7834	198	580.63	0.6217	0.0145228	42.16	-93.9	1369.37
7835	198	238.29	-0.2213	0.0162262	42.16	-93.9	1711.71
7836	198	-104.06	0.7647	0.0151581	42.16	-93.9	2054.06
7837	198	-446.4	-0.2933	0.0234584	42.16	-93.9	2396.4
7838	198	-693.1	-0.3503	0.0167625	42.16	-93.9	2643.1
7839	198	-844.16	-0.2213	0.0162262	42.16	-93.9	2794.16
7840	198	-995.22	-0.5073	0.0868486	42.16	-93.9	2945.22
7841	198	-1297.33	-0.2783	0.0379198	42.16	-93.9	3247.33
7869	199	1950	0.4587	0.0570962	41.28	-74.75	0
7870	199	1723.25	0.6167	0.0596252	41.28	-74.75	226.75
7871	199	1602.31	0.6307	0.0616197	41.28	-74.75	347.69
7872	199	1496.49	0.0017	0.0269646	41.28	-74.75	453.51
7873	199	1027.87	-1.0123	0.0177846	41.28	-74.75	922.13
7874	199	574.36	-0.7553	0.0300687	41.28	-74.75	1375.64
7876	199	-347.78	0.2167	0.0492264	41.28	-74.75	2297.78
7877	199	-816.4	0.3017	0.0601375	41.28	-74.75	2766.4
7878	199	-1269.91	0.4307	0.0600343	41.28	-74.75	3219.91
7911	200	1950	0.3669	0.0402762	45.47	-75.81	0
7912	200	1890	0.5819	0.052161	45.47	-75.81	60
7913	200	1875	0.3529	0.0546022	45.47	-75.81	75
7914	200	1860	0.7239	0.0439698	45.47	-75.81	90
7915	200	1845	0.5099	0.0574713	45.47	-75.81	105
7916	200	1830	0.5389	0.0556439	45.47	-75.81	120
7917	200	1815	0.3099	0.0493653	45.47	-75.81	135
7918	200	1800	0.1099	0.0455137	45.47	-75.81	150
7919	200	1531.69	-0.0611	0.0562701	45.47	-75.81	418.31
7920	200	1263.39	0.1529	0.04375	45.47	-75.81	686.61
7921	200	995.08	-0.2331	0.0726141	45.47	-75.81	954.92
7922	200	726.77	-0.0181	0.0566343	45.47	-75.81	1223.23
7923	200	458.46	0.2669	0.0378378	45.47	-75.81	1491.54
7924	200	190.16	-0.1181	0.0490884	45.47	-75.81	1759.84
7925	200	-78.15	-0.0761	0.0564516	45.47	-75.81	2028.15
7926	200	-346.46	0.0239	0.0478142	45.47	-75.81	2296.46
7927	200	-614.77	-0.0041	0.0457516	45.47	-75.81	2564.77
7928	200	-883.07	0.0669	0.0620567	45.47	-75.81	2833.07
7929	200	-1151.38	-0.1041	0.0432633	45.47	-75.81	3101.38
7952	201	1699.51	0.3514	1	45.03	-93.63	250.49
7953	201	1690.49	0.3514	1	45.03	-93.63	259.51
7954	201	1681.48	0.3514	1	45.03	-93.63	268.52
7955	201	1672.47	0.3364	0.5	45.03	-93.63	277.53
7956	201	1654.45	0.1654	0.121528	45.03	-93.63	295.55
7957	201	1645.44	0.3514	1	45.03	-93.63	304.56
7958	201	1636.43	0.3514	1	45.03	-93.63	313.57
7959	201	1619.58	-0.0206	0.0726141	45.03	-93.63	330.42
7960	201	1596.33	0.1364	0.0790068	45.03	-93.63	353.67
7961	201	1582.38	0.1364	0.114379	45.03	-93.63	367.62
7962	201	1561.45	0.3514	1	45.03	-93.63	388.55
7963	201	1538.2	0.0794	0.10574	45.03	-93.63	411.8
7964	201	1491.69	-0.2916	0.0711382	45.03	-93.63	458.31
7965	201	1445.19	-0.0346	0.0765864	45.03	-93.63	504.81
7966	201	1411.71	-0.3776	0.0772627	45.03	-93.63	538.29
7967	201	1324.33	-0.5486	0.064695	45.03	-93.63	625.67
7968	201	1236.95	-0.6776	0.131579	45.03	-93.63	713.05
7969	201	1062.18	-0.0776	0.0813953	45.03	-93.63	887.82
7970	201	800.02	-0.2206	0.0637523	45.03	-93.63	1149.98
7971	201	537.87	-0.1636	0.0715746	45.03	-93.63	1412.13
7972	201	275.72	0.0654	0.0831354	45.03	-93.63	1674.28
7973	201	13.57	-0.0206	0.0810185	45.03	-93.63	1936.43
7974	201	-248.59	-0.1056	0.0862069	45.03	-93.63	2198.59
7975	201	-510.74	-0.1056	0.0862069	45.03	-93.63	2460.74
7976	201	-772.89	-0.0776	0.0813953	45.03	-93.63	2722.89
7977	201	-1012.07	-0.3056	0.0827423	45.03	-93.63	2962.07
7978	201	-1156.2	-0.4346	0.0709939	45.03	-93.63	3106.2
7979	201	-1228.26	-0.3346	0.0736842	45.03	-93.63	3178.26
8020	202	1947.27	-0.3589	0.0380849	42.92	-81.25	2.73
8021	202	1922.73	0.2701	0.0329877	42.92	-81.25	27.27
8022	202	1895.45	0.3561	0.0368034	42.92	-81.25	54.55
8023	202	1868.18	-0.1869	0.0347222	42.92	-81.25	81.82
8024	202	1840.91	-1.0299	0.062167	42.92	-81.25	109.09
8025	202	1813.64	-0.7439	0.0566343	42.92	-81.25	136.36
8026	202	1643.94	-0.8019	0.0301205	42.92	-81.25	306.06
8027	202	1331.82	-0.9019	0.0411281	42.92	-81.25	618.18
8028	202	1019.7	0.8981	0.0480769	42.92	-81.25	930.3
8029	202	707.58	0.3701	0.0388457	42.92	-81.25	1242.42
8030	202	395.45	0.3411	0.038674	42.92	-81.25	1554.55
8031	202	83.33	0.7411	0.0306748	42.92	-81.25	1866.67
8032	202	-228.79	-0.8299	0.0502152	42.92	-81.25	2178.79
8033	202	-540.91	-0.3439	0.035533	42.92	-81.25	2490.91
8034	202	-853.03	0.5271	0.0452781	42.92	-81.25	2803.03
8035	202	-1165.15	0.5271	0.0452781	42.92	-81.25	3115.15
8161	205	1950	-0.143	0.137255	41.58	-85.25	0
8162	205	1907.14	-0.071	0.110759	41.58	-85.25	42.86
8163	205	1864.29	0	0.10574	41.58	-85.25	85.71
8164	205	1766.03	0	0.10574	41.58	-85.25	183.97
8165	205	1652.8	0	0.10574	41.58	-85.25	297.2
8166	205	1539.58	0	0.10574	41.58	-85.25	410.42
8167	205	1426.35	0	0.10574	41.58	-85.25	523.65
8168	205	1313.12	0	0.10574	41.58	-85.25	636.88
8169	205	1128.65	-0.143	0.0827423	41.58	-85.25	821.35
8170	205	913.64	0	0.10574	41.58	-85.25	1036.36
8171	205	698.63	0	0.10574	41.58	-85.25	1251.37
8172	205	483.63	0	0.10574	41.58	-85.25	1466.37
8173	205	268.62	0	0.10574	41.58	-85.25	1681.38
8174	205	-82.65	0	0.10574	41.58	-85.25	2032.65
8175	205	-524.75	0.1	0.100575	41.58	-85.25	2474.75
8176	205	-999.64	0.043	0.101156	41.58	-85.25	2949.64
8258	208	1967	0.0344	0.0568182	42.62	-78.47	-17
8259	208	1944.16	-0.1236	0.0591216	42.62	-78.47	5.84
8260	208	1898.47	-0.2376	0.0549451	42.62	-78.47	51.53
8261	208	1852.78	-0.3656	0.0625	42.62	-78.47	97.22
8262	208	1807.09	-0.4516	0.0746269	42.62	-78.47	142.91
8263	208	1762.68	0.1484	0.0469169	42.62	-78.47	187.32
8264	208	1719.54	-0.0376	0.0453956	42.62	-78.47	230.46
8265	208	1676.4	-0.0376	0.0453956	42.62	-78.47	273.6
8266	208	1590.13	-0.0376	0.0453956	42.62	-78.47	359.87
8267	208	1460.72	-0.0376	0.0453956	42.62	-78.47	489.28
8268	208	1331.3	-0.0376	0.0453956	42.62	-78.47	618.7
8269	208	1158.75	0.0194	0.0436954	42.62	-78.47	791.25
8270	208	899.92	0.0194	0.0436954	42.62	-78.47	1050.08
8271	208	662.62	0.0194	0.0436954	42.62	-78.47	1287.38
8272	208	230.85	0.0194	0.0436954	42.62	-78.47	1719.15
8273	208	-200.91	0.1624	0.0362694	42.62	-78.47	2150.91
8274	208	-632.68	-0.0516	0.0461741	42.62	-78.47	2582.68
8275	208	-1064.45	-0.1516	0.0458716	42.62	-78.47	3014.45
8487	212	1950	-0.1959	0.0445293	43.4	-88.1	0
8488	212	1907.51	-0.6389	0.044586	43.4	-88.1	42.49
8489	212	1865.02	-0.0099	0.0495751	43.4	-88.1	84.98
8490	212	1849.09	-0.1959	0.0500715	43.4	-88.1	100.91
8491	212	1734.12	-0.2389	0.0500715	43.4	-88.1	215.88
8492	212	1665.29	-0.1389	0.0520833	43.4	-88.1	284.71
8493	212	1597.93	0.0041	0.0709939	43.4	-88.1	352.07
8494	212	1343.05	-0.1959	0.0473613	43.4	-88.1	606.95
8495	212	1088.18	0.0751	0.0568182	43.4	-88.1	861.82
8496	212	833.3	-0.0819	0.064695	43.4	-88.1	1116.7
8497	212	578.43	-0.0099	0.0495751	43.4	-88.1	1371.57
8498	212	323.55	0.1471	0.0679612	43.4	-88.1	1626.45
8499	212	68.68	0.1901	0.10574	43.4	-88.1	1881.32
8500	212	-58.76	0.2041	0.169082	43.4	-88.1	2008.76
8501	212	-186.19	0.0181	0.045045	43.4	-88.1	2136.19
8502	212	-313.63	-0.0529	0.047749	43.4	-88.1	2263.63
8503	212	-488.15	0.0751	0.0980392	43.4	-88.1	2438.15
8504	212	-803.89	0.0041	0.0492264	43.4	-88.1	2753.89
8505	212	-1119.64	0.3041	0.146444	43.4	-88.1	3069.64
8537	213	1950	0.2798	0.0732218	45.6	-76.1	0
8538	213	1925	-0.3342	0.0456919	45.6	-76.1	25
8539	213	1900	0.0798	0.0367261	45.6	-76.1	50
8540	213	1850	0.0088	0.059322	45.6	-76.1	100
8541	213	1684.05	0.1368	0.047043	45.6	-76.1	265.95
8542	213	1452.15	-0.2342	0.0620567	45.6	-76.1	497.85
8543	213	1220.26	0.0088	0.0483425	45.6	-76.1	729.74
8544	213	988.36	0.3088	0.0673077	45.6	-76.1	961.64
8545	213	756.46	-0.2202	0.0461741	45.6	-76.1	1193.54
8546	213	524.57	0.1368	0.0619469	45.6	-76.1	1425.43
8547	213	292.67	0.1228	0.0532725	45.6	-76.1	1657.33
8548	213	60.77	-0.0062	0.0797267	45.6	-76.1	1889.23
8549	213	-171.12	-0.0342	0.0810185	45.6	-76.1	2121.12
8550	213	-403.02	-0.1062	0.0628366	45.6	-76.1	2353.02
8551	213	-634.92	-0.0492	0.0535168	45.6	-76.1	2584.92
8553	213	-866.81	-0.0632	0.0549451	45.6	-76.1	2816.81
8554	213	-1098.71	0.3508	0.0707071	45.6	-76.1	3048.71
8853	221	1408.83	-0.157	0.0492264	41.5	-74.33	541.17
8854	221	847.52	0.443	0.056	41.5	-74.33	1102.48
8855	221	283.81	-0.286	0.0432633	41.5	-74.33	1666.19
8880	222	1950	-0.3758	0.0607639	41.37	-72.12	0
8881	222	1868.37	-0.0898	0.035035	41.37	-72.12	81.63
8882	222	1827.55	0.3532	0.0531915	41.37	-72.12	122.45
8883	222	1750	-0.2188	0.0853659	41.37	-72.12	200
8884	222	1654.44	0.0532	0.0752688	41.37	-72.12	295.56
8885	222	1482.43	-0.1328	0.0694444	41.37	-72.12	467.57
8886	222	1298.26	0.0532	0.0911458	41.37	-72.12	651.74
8887	222	1115.82	0.1952	0.101449	41.37	-72.12	834.18
8888	222	933.38	-0.2618	0.0478142	41.37	-72.12	1016.62
8889	222	662.34	-0.0048	0.07431	41.37	-72.12	1287.66
8890	222	568.51	0.1532	0.0892857	41.37	-72.12	1381.49
8891	222	266.64	-0.2328	0.0464191	41.37	-72.12	1683.36
8892	222	-106.74	0.1812	0.102339	41.37	-72.12	2056.74
8893	222	-264.21	0.0812	0.0853659	41.37	-72.12	2214.21
8894	222	-506.62	-0.0048	0.0630631	41.37	-72.12	2456.62
8895	222	-746.12	0.1382	0.0855746	41.37	-72.12	2696.12
8971	223	-50	-0.3763	0.047619	46.58	-93.6	2000
8972	223	-136.2	-0.0763	0.0368809	46.58	-93.6	2086.2
8973	223	-308.6	0.4527	0.0364964	46.58	-93.6	2258.6
8974	223	-1170.61	0.5667	0.037037	46.58	-93.6	3120.61
8994	224	1965	0.6665	0.0994318	45.28	-91.46	-15
8995	224	1955	0.5235	0.0862069	45.28	-91.46	-5
8996	224	1945	0.5525	0.0945946	45.28	-91.46	5
8997	224	1935	0.7815	0.0676983	45.28	-91.46	15
8998	224	1925	0.4385	0.0774336	45.28	-91.46	25
8999	224	1915	0.2235	0.055205	45.28	-91.46	35
9000	224	1905	-0.5335	0.0341463	45.28	-91.46	45
9001	224	1895	-0.3335	0.0525526	45.28	-91.46	55
9002	224	1885	-0.0905	0.0819672	45.28	-91.46	65
9003	224	1875	-0.0475	0.0375536	45.28	-91.46	75
9004	224	1865	0.4665	0.0821596	45.28	-91.46	85
9005	224	1855	-0.1335	0.0378378	45.28	-91.46	95
9006	224	1845	0.2955	0.0825472	45.28	-91.46	105
9007	224	1835	0.2665	0.0472973	45.28	-91.46	115
9008	224	1825	-0.0185	0.0471698	45.28	-91.46	125
9009	224	1815	0.5095	0.0859951	45.28	-91.46	135
9010	224	1805	-0.5765	0.0752688	45.28	-91.46	145
9011	224	1795	0.2095	0.0406977	45.28	-91.46	155
9012	224	1785	-0.3335	0.0533537	45.28	-91.46	165
9013	224	1775	0.3665	0.0870647	45.28	-91.46	175
9014	224	1765	-0.0905	0.0370763	45.28	-91.46	185
9015	224	1725	-0.1335	0.0921053	45.28	-91.46	225
9016	224	1685	-0.0475	0.159091	45.28	-91.46	265
9017	224	1645	-0.2335	0.0913838	45.28	-91.46	305
9018	224	1605	-0.2905	0.0679612	45.28	-91.46	345
9019	224	1565	0.0665	0.421687	45.28	-91.46	385
9020	224	1525	0.0815	0.397727	45.28	-91.46	425
9021	224	1485	0.5095	0.0859951	45.28	-91.46	465
9022	224	1445	0.0955	0.388889	45.28	-91.46	505
9023	224	1405	0.3525	0.0909091	45.28	-91.46	545
9024	224	1365	-0.0905	0.0877193	45.28	-91.46	585
9025	224	1325	-0.2765	0.0665399	45.28	-91.46	625
9026	224	1285	0.1525	0.0517751	45.28	-91.46	665
9027	224	1245	-0.0905	0.0877193	45.28	-91.46	705
9028	224	1205	0.0665	0.0589226	45.28	-91.46	745
9029	224	1165	-0.1615	0.050578	45.28	-91.46	785
9030	225	1953.04	0.1529	0.0708502	44.87	-93.87	-3.04
9031	225	1930.04	0.2959	0.100287	44.87	-93.87	19.96
9032	225	1907.04	0.3809	0.12069	44.87	-93.87	42.96
9033	225	1885.88	0.2959	0.0827423	44.87	-93.87	64.12
9034	225	1867.48	0.0809	0.0744681	44.87	-93.87	82.52
9035	225	1845.97	0.3959	0.120275	44.87	-93.87	104.03
9036	225	1765.43	0.3959	0.134615	44.87	-93.87	184.57
9037	225	1684.88	0.3959	0.134615	44.87	-93.87	265.12
9038	225	1604.33	0.3099	0.102339	44.87	-93.87	345.67
9039	225	1523.79	0.2239	0.0671785	44.87	-93.87	426.21
9040	225	1443.24	-0.2041	0.0511696	44.87	-93.87	506.76
9041	225	1306.26	0.1239	0.0481431	44.87	-93.87	643.74
9042	225	1169.28	0.1099	0.0645756	44.87	-93.87	780.72
9043	225	1032.3	0.0529	0.0670498	44.87	-93.87	917.7
9044	225	895.32	0.1669	0.0682261	44.87	-93.87	1054.68
9045	225	758.34	0.1239	0.0669216	44.87	-93.87	1191.66
9046	225	621.36	-0.0191	0.0393258	44.87	-93.87	1328.64
9047	225	484.38	0.1529	0.07	44.87	-93.87	1465.62
9048	225	347.4	0.1099	0.0645756	44.87	-93.87	1602.6
9049	225	210.42	0.2379	0.0784753	44.87	-93.87	1739.58
9050	225	73.44	-0.3621	0.0300172	44.87	-93.87	1876.56
9051	225	-86.14	-0.0901	0.0382096	44.87	-93.87	2036.14
9052	225	-245.72	-0.0471	0.0382096	44.87	-93.87	2195.72
9053	225	-405.3	-0.3621	0.0300172	44.87	-93.87	2355.3
9054	225	-564.88	0.0099	0.0375134	44.87	-93.87	2514.88
9055	225	-724.46	-0.9331	0.023427	44.87	-93.87	2674.46
9056	225	-1203.21	-0.3191	0.0317029	44.87	-93.87	3153.21
9069	226	1455.24	-0.4525	0.0526316	46.13	-85.18	494.76
9070	226	1287.13	-0.4385	0.05	46.13	-85.18	662.87
9071	226	1077	-0.5095	0.072314	46.13	-85.18	873
9072	226	866.86	0.0475	0.0513196	46.13	-85.18	1083.14
9073	226	656.73	0.2615	0.0467914	46.13	-85.18	1293.27
9074	226	446.6	0.4195	0.0546022	46.13	-85.18	1503.4
9075	226	320.52	0.3765	0.0527108	46.13	-85.18	1629.48
9076	226	26.33	0.1905	0.0578512	46.13	-85.18	1923.67
9077	226	-183.8	0.0765	0.050578	46.13	-85.18	2133.8
9078	226	-393.93	-0.1095	0.0443599	46.13	-85.18	2343.93
9079	226	-604.06	0.2045	0.0674374	46.13	-85.18	2554.06
9080	226	-870.9	-0.0665	0.0486787	46.13	-85.18	2820.9
9081	226	-1156.41	-0.0525	0.0505051	46.13	-85.18	3106.41
9098	227	1550.07	-0.4298	0.0422195	46.65	-72.98	399.93
9099	227	1025.18	-0.2728	0.0546875	46.65	-72.98	924.82
9100	227	675.25	0.2122	0.0444727	46.65	-72.98	1274.75
9101	227	150.36	-0.1448	0.0483425	46.65	-72.98	1799.64
9102	227	-245.69	0.0122	0.0652985	46.65	-72.98	2195.69
9103	227	-466.78	0.2982	0.0549451	46.65	-72.98	2416.78
9104	227	-687.87	0.1842	0.0441362	46.65	-72.98	2637.87
9105	227	-842.63	-0.3298	0.0969529	46.65	-72.98	2792.63
9106	227	-1019.5	0.4702	0.0504323	46.65	-72.98	2969.5
9107	227	-1174.27	-0.5018	0.136719	46.65	-72.98	3124.27
9151	228	1950	0.0957	0.0502874	42.83	-71.67	0
9152	228	1483.17	-0.1333	0.035	42.83	-71.67	466.83
9153	228	1016.34	0.1097	0.0330189	42.83	-71.67	933.66
9154	228	8.96	0.0237	0.0478142	42.83	-71.67	1941.04
9155	228	-1235	0.3957	0.0490196	42.83	-71.67	3185
9194	230	1925	-0.6711	0.0630631	46.06	-74.47	25
9195	230	1785.23	-0.2431	0.0819672	46.06	-74.47	164.77
9196	230	1461.39	0.0289	0.129151	46.06	-74.47	488.61
9197	230	1137.54	0.0999	0.0380022	46.06	-74.47	812.46
9198	230	813.7	-0.1711	0.140562	46.06	-74.47	1136.3
9199	230	489.86	-0.0571	0.182292	46.06	-74.47	1460.14
9200	230	166.01	-0.1861	0.0841346	46.06	-74.47	1783.99
9201	230	-157.83	-0.0001	0.115894	46.06	-74.47	2107.83
9202	230	-481.68	0.0429	0.1341	46.06	-74.47	2431.68
9203	230	-805.52	0.2429	0.0517751	46.06	-74.47	2755.52
9204	230	-1129.37	0.1859	0.0502874	46.06	-74.47	3079.37
9241	231	1904	-0.5313	0.0495751	46.17	-74.4	46
9242	231	1800	-0.3453	0.060241	46.17	-74.4	150
9243	231	1568.85	-0.2023	0.0718686	46.17	-74.4	381.15
9244	231	1337.7	0.3407	0.0423216	46.17	-74.4	612.3
9245	231	1106.55	0.1407	0.0726141	46.17	-74.4	843.45
9246	231	875.4	0.1257	0.101449	46.17	-74.4	1074.6
9247	231	644.25	0.1407	1	46.17	-74.4	1305.75
9248	231	413.11	-0.8883	0.0215916	46.17	-74.4	1536.89
9249	231	181.96	-0.1453	0.0219436	46.17	-74.4	1768.04
9250	231	-49.19	0.1117	0.102339	46.17	-74.4	1999.19
9251	231	-280.34	-1.1593	0.0224647	46.17	-74.4	2230.34
9252	231	-511.49	0.1977	0.0899743	46.17	-74.4	2461.49
9253	231	-742.64	0.8977	0.0488145	46.17	-74.4	2692.64
9254	231	-973.79	0.4407	0.0429448	46.17	-74.4	2923.79
9255	231	-1204.94	0.1117	0.0883838	46.17	-74.4	3154.94
9413	237	1968.5	0.0732	0.0601375	47.92	-91.87	-18.5
9414	237	1961.18	0.4163	0.0263554	47.92	-91.87	-11.18
9415	237	1955.53	0.0732	0.0304083	47.92	-91.87	-5.53
9416	237	1949.59	-0.3407	0.0531108	47.92	-91.87	0.41
9417	237	1948.99	0.6023	0.0321396	47.92	-91.87	1.01
9418	237	1948.38	0.2733	0.0380022	47.92	-91.87	1.62
9419	237	1948.08	-0.1267	0.0413712	47.92	-91.87	1.92
9420	237	1947.48	-0.3267	0.0436954	47.92	-91.87	2.52
9421	237	1947.05	-0.3118	0.0523169	47.92	-91.87	2.95
9422	237	1931.92	-0.4408	0.0549451	47.92	-91.87	18.08
9423	237	1902.08	-0.2407	0.0406032	47.92	-91.87	47.92
9424	237	1872.24	0.1023	0.0595238	47.92	-91.87	77.76
9425	237	1842.4	0.1593	0.0642202	47.92	-91.87	107.6
9426	237	1693.2	0.4163	0.0399543	47.92	-91.87	256.8
9427	237	1544	-0.0548	0.0325885	47.92	-91.87	406
9428	237	1394.8	-0.1547	0.0410798	47.92	-91.87	555.2
9429	237	1245.6	0.0592	0.0600343	47.92	-91.87	704.4
9430	237	1096.4	-0.1547	0.0410798	47.92	-91.87	853.6
[truncated: 3,051 more rows]

## Sheet: J_Liu_Trace21ann_NCUS_tas_land_
age	tas_Ann	tas_DJF	tas_MAM	tas_JJA	tas_SON	tas_JFM	tas_JAS	yearce	calyrbp	tas_Ann_anom	tas_DJF_anom	tas_MAM_anom	tas_JJA_anom	tas_SON_anom	tas_JFM_anom	tas_JAS_anom
-22	-16.3702	-33.4163	-16.5599	1.55125	-17.5571	-30.8473	-0.518149	-22000	22000	-170.811	-102.942	-140.655	-115.091	-115.78	-119.294	-86.1105
-21.99	-16.374	-33.4307	-16.6342	1.60223	-17.4996	-30.8133	-0.453633	-21990	21990	-170.841	-102.997	-141.13	-114.726	-115.503	-119.141	-85.7936
-21.98	-16.3742	-33.4335	-16.6755	1.63249	-17.4615	-30.7702	-0.417435	-21980	21980	-170.842	-103.008	-141.393	-114.509	-115.32	-118.947	-85.6158
-21.97	-16.3745	-33.431	-16.7057	1.63824	-17.437	-30.7334	-0.399358	-21970	21970	-170.845	-102.998	-141.586	-114.468	-115.202	-118.781	-85.527
-21.96	-16.3732	-33.4241	-16.7246	1.62889	-17.4184	-30.6955	-0.379171	-21960	21960	-170.835	-102.972	-141.707	-114.535	-115.113	-118.611	-85.4278
-21.95	-16.3702	-33.4112	-16.7353	1.6208	-17.403	-30.6537	-0.347771	-21950	21950	-170.811	-102.922	-141.775	-114.593	-115.039	-118.423	-85.2736
-21.94	-16.3648	-33.3963	-16.7383	1.62219	-17.3941	-30.6147	-0.307211	-21940	21940	-170.77	-102.864	-141.794	-114.583	-114.996	-118.247	-85.0743
-21.93	-16.3604	-33.3877	-16.7366	1.63045	-17.3885	-30.593	-0.266797	-21930	21930	-170.736	-102.831	-141.783	-114.524	-114.969	-118.15	-84.8758
-21.92	-16.3613	-33.3909	-16.7363	1.63336	-17.3875	-30.5883	-0.237098	-21920	21920	-170.743	-102.844	-141.781	-114.503	-114.964	-118.128	-84.7299
-21.91	-16.3668	-33.4045	-16.7382	1.62775	-17.3864	-30.5991	-0.2207	-21910	21910	-170.785	-102.896	-141.794	-114.543	-114.959	-118.177	-84.6494
-21.9	-16.3744	-33.4255	-16.7394	1.62176	-17.3855	-30.6194	-0.215766	-21900	21900	-170.844	-102.977	-141.801	-114.586	-114.954	-118.268	-84.6251
-21.89	-16.3819	-33.4563	-16.7392	1.61494	-17.3905	-30.6421	-0.219398	-21890	21890	-170.902	-103.096	-141.8	-114.635	-114.978	-118.37	-84.643
-21.88	-16.3898	-33.4961	-16.7377	1.61095	-17.3912	-30.6684	-0.224521	-21880	21880	-170.963	-103.249	-141.79	-114.663	-114.982	-118.489	-84.6681
-21.87	-16.3927	-33.5392	-16.7332	1.62075	-17.3809	-30.6905	-0.223163	-21870	21870	-170.985	-103.415	-141.762	-114.593	-114.932	-118.588	-84.6615
-21.86	-16.3922	-33.5856	-16.7232	1.64235	-17.37	-30.7065	-0.215717	-21860	21860	-170.981	-103.594	-141.698	-114.439	-114.88	-118.66	-84.6249
-21.85	-16.3891	-33.6313	-16.7081	1.67082	-17.361	-30.7258	-0.206525	-21850	21850	-170.957	-103.77	-141.601	-114.235	-114.837	-118.747	-84.5797
-21.84	-16.3881	-33.681	-16.6904	1.6991	-17.3579	-30.7534	-0.207564	-21840	21840	-170.95	-103.961	-141.488	-114.032	-114.822	-118.871	-84.5848
-21.83	-16.3901	-33.7319	-16.6722	1.72188	-17.3636	-30.7871	-0.221356	-21830	21830	-170.965	-104.157	-141.372	-113.869	-114.849	-119.023	-84.6526
-21.82	-16.3925	-33.7786	-16.6542	1.73838	-17.3758	-30.8208	-0.244223	-21820	21820	-170.984	-104.337	-141.257	-113.751	-114.908	-119.175	-84.7649
-21.81	-16.3941	-33.8137	-16.6374	1.75245	-17.3834	-30.8467	-0.271002	-21810	21810	-170.996	-104.472	-141.15	-113.65	-114.944	-119.291	-84.8965
-21.8	-16.3932	-33.8395	-16.6231	1.76639	-17.3943	-30.8619	-0.287818	-21800	21800	-170.989	-104.571	-141.059	-113.551	-114.997	-119.36	-84.9791
-21.79	-16.3907	-33.854	-16.615	1.78596	-17.4147	-30.8681	-0.295024	-21790	21790	-170.97	-104.627	-141.007	-113.41	-115.095	-119.387	-85.0145
-21.78	-16.3906	-33.8553	-16.6092	1.81262	-17.4511	-30.8671	-0.289277	-21780	21780	-170.969	-104.632	-140.97	-113.22	-115.27	-119.383	-84.9862
-21.77	-16.39	-33.8446	-16.6058	1.84184	-17.4981	-30.8631	-0.28068	-21770	21770	-170.964	-104.591	-140.948	-113.01	-115.496	-119.365	-84.944
-21.76	-16.3923	-33.8234	-16.61	1.86679	-17.5547	-30.8585	-0.273391	-21760	21760	-170.982	-104.509	-140.975	-112.832	-115.768	-119.344	-84.9082
-21.75	-16.3982	-33.7951	-16.6197	1.88158	-17.6125	-30.8513	-0.277203	-21750	21750	-171.028	-104.4	-141.037	-112.726	-116.046	-119.312	-84.9269
-21.74	-16.4055	-33.7627	-16.6291	1.8909	-17.6716	-30.8402	-0.289607	-21740	21740	-171.084	-104.276	-141.097	-112.659	-116.33	-119.262	-84.9879
-21.73	-16.4134	-33.7299	-16.6375	1.90623	-17.7308	-30.8291	-0.303805	-21730	21730	-171.145	-104.149	-141.151	-112.549	-116.615	-119.212	-85.0576
-21.72	-16.4224	-33.7012	-16.6483	1.93035	-17.7871	-30.8256	-0.316043	-21720	21720	-171.214	-104.039	-141.22	-112.377	-116.885	-119.196	-85.1177
-21.71	-16.4338	-33.6836	-16.6694	1.95657	-17.8364	-30.8301	-0.32545	-21710	21710	-171.302	-103.971	-141.354	-112.189	-117.122	-119.216	-85.1639
-21.7	-16.446	-33.6773	-16.6974	1.98177	-17.8741	-30.8465	-0.332234	-21700	21700	-171.397	-103.947	-141.533	-112.009	-117.304	-119.29	-85.1972
-21.69	-16.4595	-33.6782	-16.7267	2.00211	-17.9079	-30.8655	-0.340842	-21690	21690	-171.501	-103.95	-141.72	-111.863	-117.466	-119.376	-85.2395
-21.68	-16.4713	-33.6855	-16.7478	2.02215	-17.9383	-30.88	-0.355207	-21680	21680	-171.592	-103.978	-141.855	-111.719	-117.612	-119.441	-85.3101
-21.67	-16.4764	-33.6983	-16.7449	2.04288	-17.958	-30.8953	-0.372298	-21670	21670	-171.631	-104.028	-141.836	-111.571	-117.707	-119.51	-85.394
-21.66	-16.476	-33.715	-16.7273	2.05944	-17.9647	-30.9066	-0.389559	-21660	21660	-171.628	-104.092	-141.724	-111.452	-117.739	-119.561	-85.4788
-21.65	-16.4723	-33.7368	-16.6982	2.06716	-17.9583	-30.914	-0.408141	-21650	21650	-171.6	-104.176	-141.538	-111.397	-117.709	-119.594	-85.5701
-21.64	-16.4714	-33.7613	-16.6713	2.06104	-17.9419	-30.9202	-0.428636	-21640	21640	-171.593	-104.27	-141.366	-111.441	-117.63	-119.622	-85.6708
-21.63	-16.4739	-33.7916	-16.6507	2.04069	-17.9169	-30.9316	-0.447133	-21630	21630	-171.612	-104.387	-141.235	-111.587	-117.51	-119.673	-85.7617
-21.62	-16.4801	-33.8232	-16.6414	2.00763	-17.8873	-30.9472	-0.467163	-21620	21620	-171.66	-104.509	-141.176	-111.823	-117.367	-119.743	-85.86
-21.61	-16.4896	-33.8536	-16.6438	1.96391	-17.8561	-30.9585	-0.485086	-21610	21610	-171.733	-104.626	-141.191	-112.136	-117.217	-119.794	-85.9481
-21.6	-16.497	-33.8649	-16.6508	1.91112	-17.8338	-30.96	-0.503913	-21600	21600	-171.79	-104.669	-141.236	-112.514	-117.11	-119.801	-86.0406
-21.59	-16.501	-33.8617	-16.6571	1.85643	-17.814	-30.9459	-0.522605	-21590	21590	-171.821	-104.657	-141.276	-112.906	-117.015	-119.738	-86.1324
-21.58	-16.499	-33.8442	-16.6554	1.8045	-17.7976	-30.9189	-0.538085	-21580	21580	-171.806	-104.59	-141.265	-113.278	-116.936	-119.616	-86.2084
-21.57	-16.4947	-33.8144	-16.6501	1.75479	-17.7932	-30.8786	-0.553385	-21570	21570	-171.773	-104.475	-141.231	-113.634	-116.915	-119.435	-86.2836
-21.56	-16.4913	-33.775	-16.6352	1.70714	-17.7944	-30.8348	-0.56489	-21560	21560	-171.746	-104.323	-141.136	-113.975	-116.921	-119.238	-86.3401
-21.55	-16.4898	-33.7399	-16.6289	1.66452	-17.7824	-30.7972	-0.567605	-21550	21550	-171.735	-104.188	-141.096	-114.28	-116.863	-119.068	-86.3534
-21.54	-16.4871	-33.709	-16.6332	1.63447	-17.769	-30.7689	-0.555509	-21540	21540	-171.714	-104.069	-141.123	-114.495	-116.798	-118.941	-86.294
-21.53	-16.4827	-33.6795	-16.6458	1.62672	-17.7437	-30.7543	-0.531228	-21530	21530	-171.68	-103.955	-141.204	-114.551	-116.677	-118.875	-86.1747
-21.52	-16.4785	-33.6591	-16.6563	1.63553	-17.7314	-30.7535	-0.500633	-21520	21520	-171.648	-103.877	-141.271	-114.487	-116.618	-118.872	-86.0245
-21.51	-16.4782	-33.6607	-16.6596	1.65739	-17.739	-30.767	-0.476903	-21510	21510	-171.645	-103.883	-141.292	-114.331	-116.654	-118.933	-85.9079
-21.5	-16.4829	-33.6731	-16.6548	1.68281	-17.7673	-30.7921	-0.463459	-21500	21500	-171.682	-103.931	-141.261	-114.149	-116.79	-119.045	-85.8419
-21.49	-16.4911	-33.6846	-16.6445	1.70916	-17.8108	-30.8217	-0.456492	-21490	21490	-171.745	-103.975	-141.195	-113.96	-116.999	-119.179	-85.8076
-21.48	-16.4988	-33.6914	-16.6381	1.73791	-17.8558	-30.8451	-0.456729	-21480	21480	-171.804	-104.001	-141.154	-113.754	-117.216	-119.284	-85.8088
-21.47	-16.5015	-33.6878	-16.6364	1.766	-17.8905	-30.8588	-0.456511	-21470	21470	-171.825	-103.987	-141.144	-113.553	-117.383	-119.346	-85.8077
-21.46	-16.4974	-33.6789	-16.6404	1.79753	-17.9014	-30.8631	-0.450861	-21460	21460	-171.794	-103.953	-141.169	-113.328	-117.435	-119.365	-85.78
-21.45	-16.4857	-33.6702	-16.6486	1.8348	-17.8913	-30.8636	-0.437952	-21450	21450	-171.703	-103.919	-141.222	-113.061	-117.386	-119.367	-85.7166
-21.44	-16.4711	-33.6677	-16.66	1.87595	-17.8688	-30.8621	-0.420382	-21440	21440	-171.59	-103.91	-141.294	-112.766	-117.278	-119.36	-85.6302
-21.43	-16.4598	-33.6643	-16.6767	1.91302	-17.8555	-30.8662	-0.408536	-21430	21430	-171.503	-103.897	-141.401	-112.501	-117.214	-119.379	-85.5721
-21.42	-16.4523	-33.6626	-16.6964	1.94313	-17.8587	-30.8727	-0.405134	-21420	21420	-171.445	-103.89	-141.527	-112.285	-117.23	-119.408	-85.5553
-21.41	-16.4465	-33.6583	-16.7166	1.96831	-17.8718	-30.8781	-0.403418	-21410	21410	-171.401	-103.874	-141.656	-112.105	-117.293	-119.432	-85.5469
-21.4	-16.4405	-33.6508	-16.7375	1.98634	-17.8793	-30.881	-0.396505	-21400	21400	-171.354	-103.845	-141.789	-111.976	-117.329	-119.446	-85.513
-21.39	-16.432	-33.6405	-16.7564	2.00394	-17.8693	-30.8818	-0.382397	-21390	21390	-171.289	-103.805	-141.91	-111.85	-117.281	-119.449	-85.4437
-21.38	-16.4176	-33.6262	-16.7736	2.02454	-17.8337	-30.8779	-0.354516	-21380	21380	-171.177	-103.75	-142.02	-111.702	-117.109	-119.432	-85.3067
-21.37	-16.397	-33.6098	-16.7897	2.05255	-17.7752	-30.8642	-0.309386	-21370	21370	-171.018	-103.687	-142.122	-111.502	-116.828	-119.37	-85.085
-21.36	-16.3743	-33.5965	-16.8016	2.07928	-17.7073	-30.8549	-0.256118	-21360	21360	-170.843	-103.636	-142.198	-111.31	-116.502	-119.328	-84.8233
-21.35	-16.3566	-33.5898	-16.8045	2.09265	-17.6461	-30.8512	-0.205807	-21350	21350	-170.706	-103.61	-142.217	-111.215	-116.207	-119.311	-84.5762
-21.34	-16.3487	-33.5879	-16.8091	2.09245	-17.6066	-30.8538	-0.167091	-21340	21340	-170.645	-103.602	-142.246	-111.216	-116.018	-119.323	-84.386
-21.33	-16.3522	-33.5947	-16.805	2.08019	-17.5988	-30.8654	-0.142819	-21330	21330	-170.672	-103.629	-142.22	-111.304	-115.98	-119.375	-84.2668
-21.32	-16.3647	-33.6101	-16.791	2.05831	-17.6163	-30.8849	-0.133629	-21320	21320	-170.769	-103.688	-142.131	-111.461	-116.064	-119.463	-84.2217
-21.31	-16.3823	-33.6296	-16.7715	2.02766	-17.6489	-30.9061	-0.138737	-21310	21310	-170.905	-103.763	-142.006	-111.68	-116.221	-119.558	-84.2467
-21.3	-16.3975	-33.6473	-16.7451	1.99874	-17.6775	-30.9224	-0.14997	-21300	21300	-171.022	-103.831	-141.838	-111.887	-116.358	-119.632	-84.3019
-21.29	-16.4041	-33.6595	-16.7131	1.97608	-17.6961	-30.9297	-0.161482	-21290	21290	-171.073	-103.878	-141.633	-112.049	-116.448	-119.665	-84.3585
-21.28	-16.402	-33.6726	-16.6771	1.96445	-17.7081	-30.9294	-0.16698	-21280	21280	-171.057	-103.929	-141.403	-112.133	-116.506	-119.663	-84.3855
-21.27	-16.3945	-33.6861	-16.6388	1.9597	-17.7221	-30.9238	-0.171517	-21270	21270	-170.999	-103.981	-141.159	-112.167	-116.573	-119.638	-84.4078
-21.26	-16.3853	-33.7035	-16.5978	1.9594	-17.7416	-30.9197	-0.178521	-21260	21260	-170.928	-104.048	-140.897	-112.169	-116.667	-119.62	-84.4422
-21.25	-16.3787	-33.7287	-16.5574	1.96807	-17.7675	-30.9273	-0.18879	-21250	21250	-170.877	-104.145	-140.639	-112.107	-116.791	-119.654	-84.4926
-21.24	-16.3729	-33.7577	-16.5154	1.98533	-17.7905	-30.944	-0.200815	-21240	21240	-170.832	-104.256	-140.371	-111.983	-116.902	-119.729	-84.5517
-21.23	-16.37	-33.7894	-16.4821	2.00718	-17.8145	-30.9638	-0.217402	-21230	21230	-170.81	-104.378	-140.159	-111.827	-117.017	-119.818	-84.6332
-21.22	-16.3727	-33.8194	-16.4582	2.02083	-17.8407	-30.9907	-0.240153	-21220	21220	-170.831	-104.494	-140.006	-111.729	-117.143	-119.939	-84.7449
-21.21	-16.3809	-33.8408	-16.4532	2.02355	-17.8611	-31.0152	-0.266088	-21210	21210	-170.894	-104.576	-139.974	-111.709	-117.241	-120.049	-84.8723
-21.2	-16.3942	-33.8571	-16.469	2.01544	-17.882	-31.0306	-0.294744	-21200	21200	-170.997	-104.639	-140.075	-111.767	-117.342	-120.119	-85.0131
-21.19	-16.4149	-33.8672	-16.5013	1.98727	-17.9072	-31.0388	-0.326957	-21190	21190	-171.157	-104.678	-140.281	-111.969	-117.463	-120.156	-85.1713
-21.18	-16.4448	-33.8714	-16.5414	1.93049	-17.938	-31.0407	-0.364784	-21180	21180	-171.387	-104.694	-140.537	-112.376	-117.611	-120.164	-85.3571
-21.17	-16.4813	-33.872	-16.5796	1.86577	-17.9785	-31.0344	-0.413766	-21170	21170	-171.669	-104.697	-140.781	-112.839	-117.806	-120.136	-85.5977
-21.16	-16.5283	-33.8709	-16.6142	1.7903	-18.0359	-31.0272	-0.475731	-21160	21160	-172.032	-104.692	-141.002	-113.379	-118.082	-120.103	-85.9021
-21.15	-16.5823	-33.8717	-16.6497	1.69134	-18.1059	-31.0281	-0.55292	-21150	21150	-172.449	-104.695	-141.229	-114.088	-118.418	-120.107	-86.2813
-21.14	-16.6416	-33.872	-16.6921	1.58196	-18.177	-31.0365	-0.63967	-21140	21140	-172.907	-104.697	-141.499	-114.871	-118.76	-120.145	-86.7074
-21.13	-16.6986	-33.871	-16.7387	1.47742	-18.2428	-31.0483	-0.725577	-21130	21130	-173.347	-104.693	-141.797	-115.619	-119.077	-120.198	-87.1294
-21.12	-16.7532	-33.8691	-16.7821	1.3744	-18.3004	-31.057	-0.806955	-21120	21120	-173.769	-104.685	-142.074	-116.357	-119.354	-120.237	-87.5292
-21.11	-16.7977	-33.8676	-16.8211	1.28343	-18.3477	-31.0602	-0.884705	-21110	21110	-174.112	-104.68	-142.323	-117.008	-119.581	-120.252	-87.9111
-21.1	-16.8393	-33.872	-16.8531	1.20301	-18.3799	-31.0603	-0.95312	-21100	21100	-174.433	-104.697	-142.527	-117.584	-119.736	-120.252	-88.2472
-21.09	-16.8748	-33.8823	-16.8773	1.13323	-18.3913	-31.0594	-1.00691	-21090	21090	-174.707	-104.736	-142.682	-118.084	-119.791	-120.248	-88.5114
-21.08	-16.8972	-33.8953	-16.8936	1.07856	-18.3782	-31.0574	-1.04012	-21080	21080	-174.88	-104.786	-142.786	-118.475	-119.728	-120.239	-88.6745
-21.07	-16.9053	-33.9028	-16.901	1.04249	-18.3418	-31.0531	-1.05433	-21070	21070	-174.943	-104.815	-142.833	-118.733	-119.553	-120.22	-88.7443
-21.06	-16.9011	-33.8986	-16.9023	1.02291	-18.2864	-31.0453	-1.05713	-21060	21060	-174.91	-104.799	-142.841	-118.873	-119.286	-120.185	-88.7581
-21.05	-16.8873	-33.8883	-16.8999	1.01623	-18.2172	-31.0369	-1.04925	-21050	21050	-174.804	-104.759	-142.826	-118.921	-118.953	-120.147	-88.7194
-21.04	-16.8676	-33.8758	-16.8985	1.02074	-18.1401	-31.0305	-1.02756	-21040	21040	-174.652	-104.711	-142.817	-118.889	-118.583	-120.118	-88.6128
-21.03	-16.8484	-33.8663	-16.8966	1.02956	-18.0641	-31.0258	-0.997227	-21030	21030	-174.504	-104.675	-142.805	-118.826	-118.217	-120.097	-88.4638
-21.02	-16.8312	-33.8611	-16.8986	1.04238	-17.9957	-31.0204	-0.963453	-21020	21020	-174.371	-104.655	-142.818	-118.734	-117.888	-120.073	-88.2979
-21.01	-16.8153	-33.8601	-16.9069	1.06299	-17.9386	-31.011	-0.917027	-21010	21010	-174.248	-104.651	-142.871	-118.587	-117.614	-120.03	-88.0699
-21	-16.801	-33.8606	-16.9164	1.09158	-17.8981	-30.9984	-0.868932	-21000	21000	-174.138	-104.653	-142.931	-118.382	-117.419	-119.974	-87.8336
-20.99	-16.7874	-33.8602	-16.9247	1.12287	-17.8703	-30.9882	-0.829341	-20990	20990	-174.033	-104.651	-142.984	-118.158	-117.285	-119.928	-87.6391
-20.98	-16.776	-33.8652	-16.9331	1.16185	-17.8549	-30.9931	-0.798705	-20980	20980	-173.945	-104.67	-143.038	-117.879	-117.211	-119.95	-87.4887
-20.97	-16.7668	-33.8792	-16.9437	1.20112	-17.8477	-31.0158	-0.767127	-20970	20970	-173.874	-104.724	-143.105	-117.598	-117.177	-120.052	-87.3335
-20.96	-16.7588	-33.8997	-16.9489	1.24648	-17.8515	-31.0437	-0.733306	-20960	20960	-173.812	-104.803	-143.139	-117.273	-117.195	-120.178	-87.1674
-20.95	-16.7491	-33.9208	-16.9488	1.2931	-17.8575	-31.0717	-0.713811	-20950	20950	-173.737	-104.885	-143.138	-116.939	-117.224	-120.304	-87.0716
-20.94	-16.7402	-33.9385	-16.9412	1.33961	-17.8706	-31.0911	-0.698984	-20940	20940	-173.668	-104.953	-143.09	-116.606	-117.287	-120.391	-86.9988
-20.93	-16.7308	-33.9522	-16.9269	1.38458	-17.8832	-31.1028	-0.688353	-20930	20930	-173.596	-105.005	-142.998	-116.284	-117.348	-120.444	-86.9466
-20.92	-16.7266	-33.966	-16.9121	1.42061	-17.9	-31.1141	-0.683315	-20920	20920	-173.563	-105.059	-142.904	-116.026	-117.428	-120.494	-86.9218
-20.91	-16.7297	-33.9809	-16.901	1.44501	-17.9243	-31.1247	-0.688985	-20910	20910	-173.587	-105.116	-142.833	-115.851	-117.545	-120.542	-86.9497
-20.9	-16.7368	-33.9935	-16.8943	1.45799	-17.9543	-31.1386	-0.707593	-20900	20900	-173.642	-105.165	-142.79	-115.759	-117.689	-120.605	-87.0411
-20.89	-16.745	-34.0013	-16.8903	1.45277	-17.986	-31.1517	-0.739575	-20890	20890	-173.705	-105.195	-142.765	-115.796	-117.842	-120.664	-87.1982
-20.88	-16.7531	-34.0016	-16.8863	1.43823	-18.0134	-31.1625	-0.77579	-20880	20880	-173.768	-105.196	-142.739	-115.9	-117.974	-120.712	-87.3761
-20.87	-16.7601	-33.9947	-16.879	1.41799	-18.0345	-31.1625	-0.811095	-20870	20870	-173.822	-105.169	-142.692	-116.045	-118.075	-120.712	-87.5495
-20.86	-16.7651	-33.98	-16.8696	1.39576	-18.0535	-31.1552	-0.8437	-20860	20860	-173.86	-105.113	-142.632	-116.204	-118.166	-120.679	-87.7097
-20.85	-16.769	-33.956	-16.8577	1.37662	-18.0769	-31.1402	-0.875213	-20850	20850	-173.891	-105.02	-142.556	-116.341	-118.279	-120.612	-87.8645
-20.84	-16.7735	-33.9289	-16.844	1.36176	-18.1095	-31.1189	-0.905994	-20840	20840	-173.925	-104.916	-142.469	-116.447	-118.436	-120.516	-88.0157
-20.83	-16.7817	-33.9025	-16.8316	1.34232	-18.1541	-31.1016	-0.941646	-20830	20830	-173.989	-104.814	-142.39	-116.587	-118.65	-120.438	-88.1908
-20.82	-16.7944	-33.8838	-16.8291	1.33094	-18.2105	-31.1015	-0.977017	-20820	20820	-174.087	-104.742	-142.374	-116.668	-118.921	-120.438	-88.3646
-20.81	-16.8116	-33.8797	-16.8415	1.33133	-18.2651	-31.1264	-1.00508	-20810	20810	-174.219	-104.726	-142.453	-116.665	-119.184	-120.55	-88.5024
-20.8	-16.8317	-33.8871	-16.8628	1.32729	-18.309	-31.1637	-1.02079	-20800	20800	-174.375	-104.755	-142.589	-116.694	-119.395	-120.718	-88.5796
-20.79	-16.8485	-33.8967	-16.8842	1.33899	-18.3389	-31.2013	-1.02266	-20790	20790	-174.504	-104.792	-142.726	-116.611	-119.539	-120.887	-88.5888
-20.78	-16.8553	-33.9007	-16.8989	1.34673	-18.352	-31.2279	-1.01316	-20780	20780	-174.557	-104.807	-142.819	-116.555	-119.602	-121.007	-88.5421
-20.77	-16.8518	-33.898	-16.9011	1.36499	-18.3521	-31.2419	-0.997074	-20770	20770	-174.53	-104.797	-142.834	-116.424	-119.602	-121.069	-88.4631
-20.76	-16.8426	-33.8915	-16.8952	1.38119	-18.3443	-31.2463	-0.973086	-20760	20760	-174.459	-104.772	-142.796	-116.308	-119.565	-121.089	-88.3452
-20.75	-16.8345	-33.8922	-16.8865	1.39686	-18.3376	-31.2497	-0.940544	-20750	20750	-174.396	-104.774	-142.74	-116.196	-119.532	-121.105	-88.1854
-20.74	-16.8286	-33.9032	-16.8819	1.41048	-18.3356	-31.2592	-0.900607	-20740	20740	-174.351	-104.817	-142.711	-116.099	-119.523	-121.147	-87.9892
-20.73	-16.8255	-33.9207	-16.8819	1.43332	-18.34	-31.2762	-0.85279	-20730	20730	-174.327	-104.884	-142.711	-115.935	-119.544	-121.224	-87.7543
-20.72	-16.8221	-33.9366	-16.882	1.46127	-18.3524	-31.2964	-0.803867	-20720	20720	-174.301	-104.945	-142.712	-115.735	-119.604	-121.315	-87.514
-20.71	-16.8209	-33.9469	-16.8809	1.48718	-18.3715	-31.3067	-0.761718	-20710	20710	-174.291	-104.985	-142.705	-115.55	-119.695	-121.361	-87.307
-20.7	-16.8201	-33.9489	-16.8784	1.50877	-18.3916	-31.3095	-0.727345	-20700	20700	-174.285	-104.993	-142.689	-115.395	-119.792	-121.374	-87.1381
-20.69	-16.8205	-33.9436	-16.8735	1.52106	-18.4096	-31.2957	-0.703221	-20690	20690	-174.288	-104.972	-142.657	-115.307	-119.879	-121.312	-87.0196
-20.68	-16.8227	-33.9362	-16.8673	1.51982	-18.4281	-31.2753	-0.693916	-20680	20680	-174.305	-104.944	-142.618	-115.316	-119.968	-121.22	-86.9739
-20.67	-16.8274	-33.9322	-16.8589	1.51276	-18.4468	-31.2547	-0.692533	-20670	20670	-174.341	-104.928	-142.564	-115.366	-120.057	-121.127	-86.9671
-20.66	-16.8322	-33.936	-16.8491	1.50901	-18.4672	-31.2383	-0.694126	-20660	20660	-174.378	-104.943	-142.502	-115.393	-120.156	-121.053	-86.9749
-20.65	-16.8361	-33.9432	-16.8405	1.51808	-18.4903	-31.2247	-0.692456	-20650	20650	-174.409	-104.971	-142.447	-115.328	-120.267	-120.992	-86.9667
-20.64	-16.8362	-33.9459	-16.8349	1.53991	-18.5068	-31.2098	-0.682421	-20640	20640	-174.409	-104.981	-142.411	-115.172	-120.346	-120.925	-86.9174
-20.63	-16.8309	-33.9411	-16.8303	1.56328	-18.5104	-31.1861	-0.667498	-20630	20630	-174.368	-104.963	-142.382	-115.005	-120.363	-120.818	-86.8441
-20.62	-16.8223	-33.9249	-16.8239	1.58052	-18.5045	-31.15	-0.651302	-20620	20620	-174.302	-104.9	-142.341	-114.881	-120.335	-120.656	-86.7646
-20.61	-16.8137	-33.902	-16.8204	1.58788	-18.4966	-31.1113	-0.637348	-20610	20610	-174.236	-104.812	-142.318	-114.829	-120.297	-120.482	-86.696
-20.6	-16.8131	-33.8753	-16.8325	1.57952	-18.497	-31.0757	-0.633572	-20600	20600	-174.231	-104.709	-142.396	-114.888	-120.299	-120.322	-86.6775
-20.59	-16.8202	-33.8538	-16.8648	1.55855	-18.4929	-31.0512	-0.633447	-20590	20590	-174.286	-104.627	-142.602	-115.039	-120.279	-120.211	-86.6769
-20.58	-16.8304	-33.8457	-16.9105	1.53641	-18.4791	-31.0404	-0.624262	-20580	20580	-174.365	-104.595	-142.894	-115.197	-120.213	-120.163	-86.6317
-20.57	-16.8372	-33.853	-16.9518	1.52392	-18.4575	-31.0404	-0.59692	-20570	20570	-174.417	-104.623	-143.157	-115.287	-120.109	-120.163	-86.4974
-20.56	-16.8383	-33.87	-16.9818	1.5229	-18.4308	-31.0459	-0.56425	-20560	20560	-174.426	-104.689	-143.349	-115.294	-119.981	-120.188	-86.337
-20.55	-16.8342	-33.8925	-16.9919	1.53014	-18.4094	-31.0535	-0.526607	-20550	20550	-174.394	-104.776	-143.413	-115.242	-119.878	-120.222	-86.152
-20.54	-16.8285	-33.9204	-16.9834	1.53663	-18.3991	-31.0634	-0.504825	-20540	20540	-174.35	-104.883	-143.359	-115.196	-119.828	-120.266	-86.045
-20.53	-16.8249	-33.9446	-16.9785	1.53704	-18.3988	-31.0738	-0.495952	-20530	20530	-174.322	-104.976	-143.328	-115.193	-119.827	-120.313	-86.0015
-20.52	-16.8272	-33.9652	-16.9731	1.52926	-18.4097	-31.0856	-0.503453	-20520	20520	-174.34	-105.056	-143.293	-115.248	-119.879	-120.366	-86.0383
-20.51	-16.835	-33.9906	-16.9743	1.51637	-18.4331	-31.105	-0.525827	-20510	20510	-174.4	-105.153	-143.301	-115.341	-119.992	-120.453	-86.1482
-20.5	-16.8475	-34.0259	-16.9773	1.50022	-18.4606	-31.1331	-0.560005	-20500	20500	-174.497	-105.289	-143.32	-115.456	-120.124	-120.58	-86.3161
-20.49	-16.86	-34.0639	-16.9695	1.48172	-18.4858	-31.1637	-0.602571	-20490	20490	-174.593	-105.436	-143.27	-115.589	-120.245	-120.718	-86.5252
-20.48	-16.8696	-34.1011	-16.9466	1.46571	-18.5118	-31.1927	-0.645273	-20480	20480	-174.667	-105.579	-143.124	-115.703	-120.37	-120.848	-86.735
-20.47	-16.8767	-34.1354	-16.9248	1.45496	-18.5386	-31.2194	-0.68646	-20470	20470	-174.722	-105.711	-142.985	-115.78	-120.499	-120.968	-86.9373
-20.46	-16.8813	-34.1675	-16.8957	1.45113	-18.5634	-31.2486	-0.716755	-20460	20460	-174.758	-105.835	-142.799	-115.808	-120.618	-121.1	-87.0861
-20.45	-16.8862	-34.195	-16.8759	1.45485	-18.5928	-31.2793	-0.736367	-20450	20450	-174.795	-105.941	-142.673	-115.781	-120.76	-121.238	-87.1824
-20.44	-16.8938	-34.2185	-16.8673	1.46783	-18.6308	-31.3095	-0.744742	-20440	20440	-174.854	-106.031	-142.618	-115.688	-120.942	-121.374	-87.2236
-20.43	-16.905	-34.226	-16.8771	1.48527	-18.6641	-31.3361	-0.748635	-20430	20430	-174.941	-106.06	-142.68	-115.563	-121.102	-121.493	-87.2427
-20.42	-16.9145	-34.2207	-16.8984	1.50155	-18.7074	-31.3566	-0.757277	-20420	20420	-175.014	-106.04	-142.816	-115.447	-121.311	-121.586	-87.2851
-20.41	-16.9203	-34.2105	-16.92	1.51759	-18.7388	-31.3638	-0.767504	-20410	20410	-175.059	-106	-142.954	-115.332	-121.462	-121.618	-87.3354
-20.4	-16.9208	-34.2013	-16.9346	1.53175	-18.7589	-31.3728	-0.777171	-20400	20400	-175.063	-105.965	-143.047	-115.23	-121.558	-121.659	-87.3829
-20.39	-16.9209	-34.1975	-16.9477	1.54196	-18.7665	-31.3847	-0.787574	-20390	20390	-175.063	-105.95	-143.131	-115.157	-121.595	-121.712	-87.434
-20.38	-16.9202	-34.1966	-16.9607	1.54935	-18.7569	-31.3951	-0.794437	-20380	20380	-175.058	-105.947	-143.214	-115.104	-121.549	-121.759	-87.4677
-20.37	-16.9187	-34.1944	-16.9735	1.5588	-18.7439	-31.4032	-0.792696	-20370	20370	-175.046	-105.938	-143.296	-115.037	-121.486	-121.795	-87.4591
-20.36	-16.9177	-34.1932	-16.9884	1.5698	-18.7336	-31.4074	-0.791922	-20360	20360	-175.039	-105.934	-143.391	-114.958	-121.437	-121.814	-87.4553
-20.35	-16.9164	-34.1841	-17.0052	1.58142	-18.7297	-31.4006	-0.792674	-20350	20350	-175.029	-105.899	-143.498	-114.875	-121.418	-121.784	-87.459
-20.34	-16.9144	-34.1724	-17.0202	1.59362	-18.722	-31.3846	-0.794334	-20340	20340	-175.013	-105.854	-143.594	-114.787	-121.381	-121.712	-87.4672
-20.33	-16.9099	-34.1607	-17.0266	1.60557	-18.7101	-31.3598	-0.795047	-20330	20330	-174.978	-105.809	-143.635	-114.702	-121.324	-121.6	-87.4707
-20.32	-16.9042	-34.141	-17.0279	1.60837	-18.6926	-31.3267	-0.800497	-20320	20320	-174.934	-105.733	-143.643	-114.682	-121.239	-121.451	-87.4975
-20.31	-16.9002	-34.1167	-17.0319	1.59801	-18.6779	-31.2927	-0.813252	-20310	20310	-174.904	-105.639	-143.669	-114.756	-121.169	-121.298	-87.5601
-20.3	-16.9027	-34.0972	-17.0447	1.57969	-18.6682	-31.2689	-0.827507	-20300	20300	-174.923	-105.564	-143.75	-114.887	-121.122	-121.191	-87.6301
-20.29	-16.912	-34.0888	-17.0633	1.55764	-18.6639	-31.2593	-0.841316	-20290	20290	-174.995	-105.532	-143.869	-115.045	-121.101	-121.148	-87.698
-20.28	-16.9253	-34.092	-17.0854	1.53255	-18.6606	-31.2608	-0.851939	-20280	20280	-175.097	-105.544	-144.01	-115.225	-121.086	-121.155	-87.7501
-20.27	-16.9389	-34.1026	-17.1023	1.51168	-18.659	-31.2665	-0.857262	-20270	20270	-175.202	-105.585	-144.118	-115.374	-121.078	-121.18	-87.7763
-20.26	-16.9487	-34.113	-17.1103	1.50433	-18.662	-31.2696	-0.858045	-20260	20260	-175.278	-105.625	-144.169	-115.427	-121.092	-121.194	-87.7801
-20.25	-16.9548	-34.1218	-17.1023	1.50335	-18.6725	-31.2687	-0.863892	-20250	20250	-175.325	-105.659	-144.118	-115.434	-121.143	-121.19	-87.8089
-20.24	-16.9578	-34.1284	-17.0804	1.50652	-18.6987	-31.2652	-0.879435	-20240	20240	-175.348	-105.684	-143.978	-115.411	-121.269	-121.174	-87.8852
-20.23	-16.9572	-34.129	-17.0508	1.50899	-18.7283	-31.2629	-0.899642	-20230	20230	-175.344	-105.686	-143.789	-115.393	-121.411	-121.164	-87.9845
-20.22	-16.9537	-34.1215	-17.0269	1.51057	-18.7532	-31.2615	-0.91696	-20220	20220	-175.317	-105.658	-143.637	-115.382	-121.531	-121.158	-88.0695
-20.21	-16.9483	-34.1089	-17.003	1.51553	-18.7744	-31.2593	-0.928488	-20210	20210	-175.275	-105.609	-143.484	-115.347	-121.633	-121.148	-88.1262
-20.2	-16.9418	-34.0975	-16.9893	1.52911	-18.7948	-31.2575	-0.933265	-20200	20200	-175.225	-105.565	-143.397	-115.249	-121.731	-121.14	-88.1496
-20.19	-16.9345	-34.0907	-16.9777	1.54868	-18.8142	-31.2585	-0.929119	-20190	20190	-175.168	-105.539	-143.323	-115.109	-121.824	-121.144	-88.1293
-20.18	-16.9254	-34.0902	-16.9629	1.57903	-18.8248	-31.2621	-0.917818	-20180	20180	-175.098	-105.537	-143.228	-114.892	-121.875	-121.16	-88.0738
-20.17	-16.9146	-34.1003	-16.9439	1.61935	-18.8167	-31.2709	-0.895583	-20170	20170	-175.015	-105.576	-143.107	-114.603	-121.836	-121.2	-87.9645
-20.16	-16.9013	-34.117	-16.9169	1.66697	-18.7912	-31.2798	-0.862253	-20160	20160	-174.912	-105.64	-142.934	-114.262	-121.713	-121.24	-87.8008
-20.15	-16.8853	-34.1328	-16.8862	1.71655	-18.7588	-31.2858	-0.819572	-20150	20150	-174.788	-105.701	-142.738	-113.907	-121.558	-121.267	-87.5912
-20.14	-16.8677	-34.1455	-16.859	1.761	-18.7244	-31.2918	-0.769036	-20140	20140	-174.653	-105.75	-142.565	-113.589	-121.392	-121.294	-87.3429
-20.13	-16.8502	-34.1538	-16.8409	1.79841	-18.6823	-31.3013	-0.716103	-20130	20130	-174.517	-105.782	-142.449	-113.321	-121.19	-121.337	-87.0829
-20.12	-16.8335	-34.1632	-16.828	1.83086	-18.6325	-31.315	-0.665744	-20120	20120	-174.389	-105.818	-142.367	-113.089	-120.95	-121.398	-86.8355
-20.11	-16.819	-34.1725	-16.8262	1.86017	-18.5753	-31.3313	-0.616856	-20110	20110	-174.277	-105.854	-142.355	-112.879	-120.675	-121.472	-86.5954
-20.1	-16.8037	-34.1817	-16.8312	1.89208	-18.5108	-31.3465	-0.56479	-20100	20100	-174.158	-105.889	-142.387	-112.651	-120.365	-121.54	-86.3396
-20.09	-16.7883	-34.1907	-16.8395	1.92724	-18.4459	-31.3617	-0.513094	-20090	20090	-174.04	-105.924	-142.44	-112.399	-120.053	-121.609	-86.0857
-20.08	-16.773	-34.1995	-16.8444	1.9588	-18.3876	-31.378	-0.469017	-20080	20080	-173.921	-105.958	-142.472	-112.173	-119.773	-121.682	-85.8692
-20.07	-16.7582	-34.2029	-16.8405	1.98012	-18.3441	-31.3861	-0.439577	-20070	20070	-173.807	-105.971	-142.447	-112.02	-119.564	-121.718	-85.7245
-20.06	-16.7436	-34.2001	-16.8262	1.99097	-18.3214	-31.3818	-0.425551	-20060	20060	-173.694	-105.96	-142.355	-111.943	-119.455	-121.699	-85.6556
-20.05	-16.7317	-34.1845	-16.8081	1.99601	-18.3273	-31.3616	-0.419446	-20050	20050	-173.603	-105.9	-142.24	-111.907	-119.483	-121.608	-85.6256
-20.04	-16.7209	-34.1592	-16.7941	1.99878	-18.3434	-31.329	-0.414249	-20040	20040	-173.519	-105.803	-142.15	-111.887	-119.56	-121.461	-85.6001
-20.03	-16.7109	-34.1286	-16.7882	2.00426	-18.361	-31.2923	-0.404745	-20030	20030	-173.442	-105.685	-142.113	-111.848	-119.645	-121.296	-85.5534
-20.02	-16.701	-34.0959	-16.7914	2.01243	-18.3682	-31.2557	-0.394544	-20020	20020	-173.366	-105.559	-142.133	-111.789	-119.68	-121.132	-85.5033
-20.01	-16.6919	-34.0635	-16.8009	2.0217	-18.3679	-31.2172	-0.386265	-20010	20010	-173.295	-105.434	-142.194	-111.723	-119.678	-120.958	-85.4627
-20	-16.6835	-34.0332	-16.8111	2.02809	-18.3698	-31.178	-0.385402	-20000	20000	-173.23	-105.317	-142.259	-111.677	-119.687	-120.782	-85.4584
-19.99	-16.6749	-34.0031	-16.8082	2.03125	-18.3744	-31.1365	-0.388737	-19990	19990	-173.164	-105.202	-142.24	-111.654	-119.709	-120.595	-85.4748
-19.98	-16.6655	-33.9694	-16.7965	2.02831	-18.3774	-31.0942	-0.397375	-19980	19980	-173.091	-105.072	-142.166	-111.675	-119.724	-120.405	-85.5172
-19.97	-16.6548	-33.9345	-16.7716	2.02243	-18.3864	-31.052	-0.413537	-19970	19970	-173.009	-104.937	-142.007	-111.717	-119.767	-120.215	-85.5966
-19.96	-16.6446	-33.9018	-16.7361	2.01167	-18.3958	-31.0158	-0.438824	-19960	19960	-172.93	-104.811	-141.78	-111.794	-119.812	-120.052	-85.7208
-19.95	-16.6365	-33.871	-16.7007	1.99656	-18.4006	-30.9909	-0.471489	-19950	19950	-172.868	-104.693	-141.554	-111.903	-119.835	-119.94	-85.8813
-19.94	-16.6312	-33.8506	-16.6776	1.98263	-18.3945	-30.9737	-0.502428	-19940	19940	-172.827	-104.614	-141.407	-112.002	-119.806	-119.863	-86.0333
-19.93	-16.6272	-33.8365	-16.6702	1.97587	-18.3694	-30.9615	-0.521994	-19930	19930	-172.796	-104.56	-141.359	-112.051	-119.685	-119.808	-86.1294
-19.92	-16.6236	-33.8282	-16.6762	1.97551	-18.336	-30.9665	-0.535412	-19920	19920	-172.768	-104.528	-141.398	-112.053	-119.525	-119.83	-86.1953
-19.91	-16.6209	-33.8231	-16.6832	1.98144	-18.3042	-30.9816	-0.549238	-19910	19910	-172.747	-104.508	-141.442	-112.011	-119.372	-119.898	-86.2632
-19.9	-16.6195	-33.8249	-16.6831	1.99183	-18.29	-30.9991	-0.567527	-19900	19900	-172.736	-104.515	-141.442	-111.937	-119.304	-119.977	-86.3531
-19.89	-16.6185	-33.8321	-16.6729	2.01023	-18.2959	-31.0184	-0.587657	-19890	19890	-172.729	-104.543	-141.377	-111.805	-119.332	-120.064	-86.4519
-19.88	-16.6161	-33.8432	-16.6559	2.03779	-18.3153	-31.0376	-0.592433	-19880	19880	-172.71	-104.586	-141.268	-111.607	-119.425	-120.15	-86.4754
-19.87	-16.6133	-33.862	-16.6326	2.07139	-18.3392	-31.0572	-0.581777	-19870	19870	-172.688	-104.658	-141.119	-111.367	-119.54	-120.238	-86.4231
-19.86	-16.6116	-33.8896	-16.6068	2.10555	-18.3663	-31.0785	-0.560736	-19860	19860	-172.675	-104.764	-140.955	-111.122	-119.67	-120.334	-86.3197
-19.85	-16.6106	-33.9222	-16.5806	2.14056	-18.3888	-31.0997	-0.534723	-19850	19850	-172.668	-104.89	-140.787	-110.872	-119.779	-120.43	-86.1919
-19.84	-16.6113	-33.9591	-16.556	2.17302	-18.419	-31.124	-0.507288	-19840	19840	-172.673	-105.032	-140.63	-110.639	-119.924	-120.539	-86.0571
-19.83	-16.6159	-33.9967	-16.5311	2.20139	-18.455	-31.1486	-0.491015	-19830	19830	-172.708	-105.177	-140.471	-110.436	-120.097	-120.65	-85.9772
-19.82	-16.62	-34.0269	-16.5065	2.22451	-18.5004	-31.1587	-0.478049	-19820	19820	-172.74	-105.293	-140.314	-110.271	-120.315	-120.695	-85.9135
-19.81	-16.6244	-34.0495	-16.4837	2.24464	-18.5493	-31.1694	-0.472526	-19810	19810	-172.774	-105.38	-140.169	-110.127	-120.55	-120.743	-85.8864
-19.8	-16.6314	-34.0723	-16.4622	2.25918	-18.5969	-31.184	-0.471143	-19800	19800	-172.828	-105.468	-140.032	-110.022	-120.779	-120.809	-85.8796
-19.79	-16.6418	-34.0981	-16.4451	2.27009	-18.6438	-31.215	-0.477046	-19790	19790	-172.908	-105.567	-139.922	-109.944	-121.005	-120.948	-85.9086
-19.78	-16.655	-34.128	-16.4337	2.27672	-18.6815	-31.2499	-0.485063	-19780	19780	-173.01	-105.683	-139.85	-109.897	-121.186	-121.105	-85.948
-19.77	-16.6672	-34.1542	-16.4292	2.27924	-18.7074	-31.2848	-0.496748	-19770	19770	-173.105	-105.783	-139.821	-109.879	-121.311	-121.263	-86.0054
-19.76	-16.675	-34.1696	-16.4287	2.27525	-18.7171	-31.3077	-0.511614	-19760	19760	-173.165	-105.843	-139.818	-109.907	-121.357	-121.366	-86.0784
-19.75	-16.6794	-34.1766	-16.4332	2.25942	-18.709	-31.3165	-0.527002	-19750	19750	-173.199	-105.87	-139.846	-110.021	-121.318	-121.405	-86.154
-19.74	-16.684	-34.1801	-16.4477	2.23289	-18.6939	-31.3178	-0.554446	-19740	19740	-173.234	-105.883	-139.939	-110.211	-121.246	-121.411	-86.2888
-19.73	-16.6913	-34.1848	-16.4758	2.20779	-18.678	-31.3198	-0.581333	-19730	19730	-173.291	-105.901	-140.118	-110.39	-121.169	-121.42	-86.4209
-19.72	-16.7024	-34.1965	-16.5162	2.19054	-18.671	-31.3283	-0.592714	-19720	19720	-173.376	-105.946	-140.376	-110.514	-121.136	-121.458	-86.4768
-19.71	-16.716	-34.2158	-16.5598	2.18129	-18.6743	-31.3423	-0.597558	-19710	19710	-173.481	-106.021	-140.655	-110.58	-121.151	-121.521	-86.5006
-19.7	-16.7308	-34.2382	-16.5962	2.17724	-18.686	-31.354	-0.596212	-19700	19700	-173.596	-106.107	-140.887	-110.609	-121.208	-121.574	-86.494
-19.69	-16.7441	-34.2602	-16.6237	2.17039	-18.6965	-31.3642	-0.597402	-19690	19690	-173.698	-106.192	-141.063	-110.658	-121.258	-121.62	-86.4998
-19.68	-16.7535	-34.2794	-16.6367	2.15978	-18.697	-31.3719	-0.584031	-19680	19680	-173.771	-106.266	-141.146	-110.734	-121.261	-121.654	-86.4341
-19.67	-16.7583	-34.2978	-16.6402	2.14341	-18.685	-31.3752	-0.568516	-19670	19670	-173.808	-106.337	-141.168	-110.851	-121.203	-121.669	-86.3579
-19.66	-16.7587	-34.3129	-16.6392	2.12235	-18.6669	-31.3742	-0.550519	-19660	19660	-173.811	-106.395	-141.162	-111.002	-121.116	-121.665	-86.2695
-19.65	-16.7552	-34.318	-16.6289	2.10116	-18.6385	-31.3697	-0.531909	-19650	19650	-173.784	-106.414	-141.096	-111.154	-120.979	-121.645	-86.1781
-19.64	-16.7482	-34.3132	-16.6255	2.08664	-18.6169	-31.3664	-0.507272	-19640	19640	-173.73	-106.396	-141.074	-111.258	-120.875	-121.63	-86.0571
-19.63	-16.7417	-34.3002	-16.6238	2.07776	-18.5984	-31.3677	-0.47998	-19630	19630	-173.68	-106.346	-141.063	-111.321	-120.786	-121.636	-85.923
-19.62	-16.7383	-34.2855	-16.6232	2.06963	-18.588	-31.3751	-0.457891	-19620	19620	-173.654	-106.289	-141.059	-111.379	-120.736	-121.669	-85.8145
-19.61	-16.7367	-34.2666	-16.6283	2.06286	-18.5848	-31.3853	-0.438605	-19610	19610	-173.641	-106.216	-141.092	-111.428	-120.721	-121.715	-85.7198
-19.6	-16.7324	-34.2437	-16.626	2.05998	-18.5814	-31.3908	-0.421655	-19600	19600	-173.608	-106.128	-141.077	-111.449	-120.705	-121.74	-85.6365
-19.59	-16.7251	-34.2178	-16.6229	2.06055	-18.5719	-31.384	-0.405551	-19590	19590	-173.552	-106.028	-141.057	-111.445	-120.659	-121.709	-85.5574
-19.58	-16.7165	-34.196	-16.6191	2.06261	-18.5542	-31.371	-0.387711	-19580	19580	-173.485	-105.944	-141.033	-111.43	-120.574	-121.65	-85.4698
-19.57	-16.7113	-34.1788	-16.6138	2.06232	-18.5376	-31.3569	-0.37385	-19570	19570	-173.445	-105.878	-140.999	-111.432	-120.494	-121.587	-85.4017
-19.56	-16.7113	-34.167	-16.62	2.0592	-18.5271	-31.3446	-0.363034	-19560	19560	-173.445	-105.833	-141.039	-111.454	-120.444	-121.532	-85.3485
-19.55	-16.719	-34.1611	-16.6293	2.04998	-18.5302	-31.335	-0.36409	-19550	19550	-173.504	-105.81	-141.098	-111.52	-120.459	-121.488	-85.3537
-19.54	-16.734	-34.1628	-16.6402	2.03329	-18.5436	-31.3303	-0.378017	-19540	19540	-173.62	-105.817	-141.168	-111.64	-120.523	-121.467	-85.4221
-19.53	-16.7545	-34.175	-16.6518	2.00977	-18.5662	-31.3329	-0.40207	-19530	19530	-173.779	-105.864	-141.242	-111.808	-120.632	-121.479	-85.5403
-19.52	-16.7786	-34.1977	-16.6694	1.9891	-18.589	-31.3426	-0.423916	-19520	19520	-173.965	-105.951	-141.354	-111.956	-120.741	-121.523	-85.6476
-19.51	-16.8025	-34.2314	-16.6908	1.98098	-18.6069	-31.356	-0.437819	-19510	19510	-174.149	-106.081	-141.491	-112.014	-120.827	-121.583	-85.7159
-19.5	-16.8226	-34.2677	-16.7085	1.98383	-18.6117	-31.3722	-0.431397	-19500	19500	-174.304	-106.221	-141.604	-111.994	-120.85	-121.656	-85.6844
-19.49	-16.8316	-34.3036	-16.7219	2.00016	-18.6009	-31.3855	-0.41281	-19490	19490	-174.374	-106.359	-141.689	-111.877	-120.798	-121.716	-85.5931
-19.48	-16.8325	-34.3199	-16.7335	2.01537	-18.5832	-31.3951	-0.390689	-19480	19480	-174.381	-106.422	-141.764	-111.768	-120.713	-121.759	-85.4844
-19.47	-16.8251	-34.3139	-16.7402	2.03542	-18.5647	-31.3961	-0.365717	-19470	19470	-174.324	-106.399	-141.806	-111.624	-120.624	-121.763	-85.3617
-19.46	-16.8113	-34.2944	-16.7389	2.05184	-18.549	-31.3895	-0.336425	-19460	19460	-174.217	-106.323	-141.798	-111.507	-120.549	-121.734	-85.2178
-19.45	-16.7936	-34.2626	-16.7379	2.06907	-18.5401	-31.3828	-0.307678	-19450	19450	-174.08	-106.201	-141.792	-111.384	-120.506	-121.704	-85.0766
-19.44	-16.772	-34.223	-16.7323	2.09017	-18.5423	-31.3668	-0.283548	-19440	19440	-173.914	-106.048	-141.756	-111.232	-120.517	-121.632	-84.9581
-19.43	-16.7508	-34.1801	-16.7234	2.11901	-18.5533	-31.3374	-0.25809	-19430	19430	-173.75	-105.883	-141.699	-111.026	-120.57	-121.499	-84.833
-19.42	-16.7284	-34.1425	-16.7122	2.15984	-18.5672	-31.3153	-0.229026	-19420	19420	-173.577	-105.738	-141.628	-110.734	-120.636	-121.4	-84.6903
-19.41	-16.7039	-34.1082	-16.6912	2.20517	-18.58	-31.2839	-0.194386	-19410	19410	-173.388	-105.606	-141.493	-110.409	-120.698	-121.258	-84.5201
-19.4	-16.6788	-34.0784	-16.6663	2.24882	-18.5921	-31.2551	-0.160429	-19400	19400	-173.194	-105.492	-141.335	-110.097	-120.756	-121.129	-84.3533
-19.39	-16.6579	-34.0572	-16.641	2.28114	-18.603	-31.227	-0.136835	-19390	19390	-173.033	-105.41	-141.173	-109.865	-120.809	-121.002	-84.2374
-19.38	-16.6423	-34.0413	-16.6186	2.30243	-18.6132	-31.2034	-0.12649	-19380	19380	-172.912	-105.349	-141.03	-109.713	-120.858	-120.896	-84.1866
-19.37	-16.6319	-34.0314	-16.6002	2.31603	-18.6249	-31.1894	-0.125831	-19370	19370	-172.832	-105.311	-140.913	-109.615	-120.914	-120.833	-84.1833
-19.36	-16.6272	-34.0345	-16.586	2.3264	-18.6361	-31.1794	-0.13286	-19360	19360	-172.796	-105.322	-140.822	-109.541	-120.968	-120.788	-84.2179
-19.35	-16.6276	-34.051	-16.5764	2.33301	-18.6439	-31.1766	-0.145911	-19350	19350	-172.799	-105.386	-140.761	-109.494	-121.005	-120.776	-84.282
-19.34	-16.6296	-34.0731	-16.5709	2.33533	-18.6466	-31.1737	-0.160256	-19340	19340	-172.814	-105.471	-140.725	-109.477	-121.018	-120.763	-84.3525
-19.33	-16.6307	-34.0945	-16.5696	2.3322	-18.6381	-31.1724	-0.172579	-19330	19330	-172.823	-105.554	-140.717	-109.5	-120.977	-120.757	-84.413
-19.32	-16.6351	-34.1116	-16.5739	2.32201	-18.6274	-31.1674	-0.183902	-19320	19320	-172.857	-105.619	-140.745	-109.573	-120.926	-120.734	-84.4686
-19.31	-16.6387	-34.1227	-16.5836	2.30743	-18.6177	-31.1577	-0.200231	-19310	19310	-172.884	-105.662	-140.807	-109.677	-120.879	-120.691	-84.5488
-19.3	-16.6473	-34.1222	-16.5977	2.29033	-18.6244	-31.1422	-0.226316	-19300	19300	-172.951	-105.66	-140.897	-109.799	-120.911	-120.621	-84.677
-19.29	-16.6595	-34.1144	-16.617	2.27392	-18.6422	-31.1235	-0.260009	-19290	19290	-173.045	-105.63	-141.02	-109.917	-120.997	-120.537	-84.8425
-19.28	-16.6764	-34.107	-16.6395	2.25795	-18.6966	-31.1058	-0.297438	-19280	19280	-173.176	-105.602	-141.163	-110.031	-121.259	-120.457	-85.0263
-19.27	-16.6933	-34.0965	-16.6611	2.23777	-18.744	-31.0891	-0.341121	-19270	19270	-173.306	-105.561	-141.301	-110.176	-121.487	-120.382	-85.2409
-19.26	-16.7115	-34.0856	-16.6804	2.21518	-18.8043	-31.0753	-0.390667	-19260	19260	-173.447	-105.519	-141.425	-110.337	-121.776	-120.32	-85.4843
-19.25	-16.7279	-34.0742	-16.6942	2.19604	-18.86	-31.0676	-0.437109	-19250	19250	-173.573	-105.475	-141.513	-110.474	-122.044	-120.285	-85.7124
-19.24	-16.7377	-34.0597	-16.6985	2.18354	-18.9067	-31.0681	-0.474756	-19240	19240	-173.649	-105.42	-141.54	-110.564	-122.269	-120.287	-85.8973
-19.23	-16.7395	-34.0443	-16.6949	2.17916	-18.9346	-31.074	-0.503268	-19230	19230	-173.663	-105.36	-141.517	-110.595	-122.403	-120.314	-86.0374
-19.22	-16.7382	-34.0367	-16.6879	2.18518	-18.9466	-31.0896	-0.522483	-19220	19220	-173.653	-105.331	-141.472	-110.552	-122.461	-120.384	-86.1318
-19.21	-16.7369	-34.0407	-16.6847	2.20501	-18.9526	-31.1168	-0.52902	-19210	19210	-173.643	-105.346	-141.452	-110.41	-122.49	-120.507	-86.1639
-19.2	-16.7342	-34.0529	-16.6874	2.2395	-18.9518	-31.1511	-0.516927	-19200	19200	-173.622	-105.393	-141.469	-110.163	-122.486	-120.661	-86.1045
-19.19	-16.7295	-34.071	-16.6929	2.28419	-18.9399	-31.1847	-0.488291	-19190	19190	-173.586	-105.463	-141.504	-109.843	-122.428	-120.812	-85.9638
-19.18	-16.7243	-34.0951	-16.6961	2.32581	-18.919	-31.2191	-0.457145	-19180	19180	-173.545	-105.556	-141.525	-109.545	-122.328	-120.967	-85.8108
-19.17	-16.7141	-34.1187	-16.6925	2.35911	-18.8814	-31.2473	-0.426009	-19170	19170	-173.467	-105.647	-141.502	-109.307	-122.147	-121.094	-85.6579
-19.16	-16.6983	-34.1433	-16.6824	2.38796	-18.8201	-31.2744	-0.390268	-19160	19160	-173.345	-105.741	-141.437	-109.1	-121.852	-121.216	-85.4823
-19.15	-16.6801	-34.1744	-16.6685	2.4151	-18.7405	-31.3031	-0.349999	-19150	19150	-173.204	-105.861	-141.349	-108.906	-121.47	-121.345	-85.2845
-19.14	-16.6629	-34.2068	-16.6552	2.43903	-18.658	-31.3276	-0.308888	-19140	19140	-173.071	-105.986	-141.264	-108.735	-121.073	-121.455	-85.0826
-19.13	-16.6497	-34.2398	-16.6422	2.45785	-18.5832	-31.3413	-0.275588	-19130	19130	-172.969	-106.113	-141.181	-108.6	-120.713	-121.517	-84.919
-19.12	-16.6409	-34.2675	-16.6315	2.47027	-18.5193	-31.3491	-0.24364	-19120	19120	-172.901	-106.22	-141.112	-108.511	-120.406	-121.552	-84.7621
-19.11	-16.6372	-34.2919	-16.6224	2.47564	-18.4677	-31.3518	-0.218511	-19110	19110	-172.873	-106.314	-141.054	-108.473	-120.158	-121.564	-84.6386
-19.1	-16.6361	-34.3077	-16.6174	2.47639	-18.4339	-31.3509	-0.197108	-19100	19100	-172.864	-106.375	-141.022	-108.467	-119.995	-121.56	-84.5335
-19.09	-16.6404	-34.3247	-16.6113	2.46735	-18.4112	-31.3503	-0.183381	-19090	19090	-172.898	-106.44	-140.983	-108.532	-119.886	-121.557	-84.466
-19.08	-16.6475	-34.348	-16.6106	2.45296	-18.4021	-31.358	-0.179109	-19080	19080	-172.952	-106.53	-140.979	-108.635	-119.843	-121.592	-84.4451
-19.07	-16.6515	-34.367	-16.6008	2.43632	-18.395	-31.3634	-0.17865	-19070	19070	-172.983	-106.603	-140.916	-108.754	-119.808	-121.616	-84.4428
-19.06	-16.653	-34.3861	-16.5847	2.42258	-18.4052	-31.3751	-0.187359	-19060	19060	-172.995	-106.677	-140.814	-108.853	-119.857	-121.669	-84.4856
-19.05	-16.6538	-34.3967	-16.5688	2.4122	-18.4228	-31.385	-0.201724	-19050	19050	-173.001	-106.717	-140.712	-108.927	-119.942	-121.713	-84.5562
-19.04	-16.6523	-34.3994	-16.5521	2.40671	-18.4448	-31.3903	-0.21386	-19040	19040	-172.99	-106.728	-140.605	-108.966	-120.048	-121.737	-84.6158
-19.03	-16.6494	-34.3916	-16.5481	2.40016	-18.4681	-31.3898	-0.223362	-19030	19030	-172.967	-106.698	-140.58	-109.013	-120.16	-121.735	-84.6624
-19.02	-16.6507	-34.3788	-16.5532	2.39228	-18.4969	-31.3866	-0.228814	-19020	19020	-172.977	-106.649	-140.612	-109.069	-120.298	-121.721	-84.6892
-19.01	-16.656	-34.3672	-16.565	2.38227	-18.5312	-31.3849	-0.230927	-19010	19010	-173.018	-106.604	-140.688	-109.141	-120.463	-121.713	-84.6996
-19	-16.6637	-34.3581	-16.5855	2.36977	-18.5692	-31.3872	-0.230518	-19000	19000	-173.078	-106.569	-140.819	-109.231	-120.646	-121.723	-84.6976
-18.99	-16.6679	-34.3514	-16.614	2.36229	-18.5974	-31.3923	-0.225512	-18990	18990	-173.11	-106.543	-141.001	-109.284	-120.782	-121.746	-84.673
-18.98	-16.6718	-34.3482	-16.6498	2.36376	-18.6109	-31.4021	-0.2052	-18980	18980	-173.14	-106.531	-141.229	-109.274	-120.847	-121.79	-84.5732
-18.97	-16.6701	-34.3498	-16.6864	2.37349	-18.6087	-31.4169	-0.189701	-18970	18970	-173.127	-106.537	-141.463	-109.204	-120.836	-121.857	-84.4971
-18.96	-16.6703	-34.3529	-16.7243	2.3873	-18.6037	-31.4374	-0.170921	-18960	18960	-173.128	-106.549	-141.705	-109.105	-120.812	-121.949	-84.4048
-18.95	-16.6736	-34.3625	-16.7556	2.40433	-18.5882	-31.463	-0.156614	-18950	18950	-173.154	-106.586	-141.905	-108.983	-120.737	-122.064	-84.3346
-18.94	-16.6768	-34.3789	-16.7776	2.42481	-18.5713	-31.4903	-0.144145	-18940	18940	-173.179	-106.649	-142.045	-108.837	-120.656	-122.187	-84.2733
-18.93	-16.6831	-34.3989	-16.7928	2.44763	-18.5518	-31.5144	-0.130983	-18930	18930	-173.227	-106.726	-142.142	-108.673	-120.562	-122.296	-84.2087
-18.92	-16.6907	-34.4248	-16.8049	2.4703	-18.532	-31.5363	-0.107602	-18920	18920	-173.286	-106.826	-142.219	-108.511	-120.467	-122.394	-84.0938
-18.91	-16.6996	-34.4543	-16.8141	2.48734	-18.5183	-31.5581	-0.0948	-18910	18910	-173.355	-106.939	-142.278	-108.389	-120.401	-122.492	-84.0309
-18.9	-16.708	-34.4838	-16.8092	2.4973	-18.5137	-31.5756	-0.0919	-18900	18900	-173.42	-107.053	-142.247	-108.318	-120.379	-122.571	-84.0167
-18.89	-16.7151	-34.5128	-16.7944	2.50349	-18.5174	-31.5867	-0.103131	-18890	18890	-173.474	-107.165	-142.152	-108.273	-120.397	-122.621	-84.0718
-18.88	-16.7241	-34.5399	-16.7792	2.50241	-18.5267	-31.5928	-0.133207	-18880	18880	-173.544	-107.269	-142.055	-108.281	-120.442	-122.648	-84.2196
-18.87	-16.7345	-34.566	-16.7681	2.4981	-18.5447	-31.6008	-0.176048	-18870	18870	-173.624	-107.369	-141.984	-108.312	-120.528	-122.684	-84.43
-18.86	-16.7471	-34.5848	-16.7569	2.48935	-18.5748	-31.6039	-0.227517	-18860	18860	-173.721	-107.442	-141.913	-108.375	-120.673	-122.698	-84.6829
-18.85	-16.7626	-34.5951	-16.745	2.48466	-18.6226	-31.6016	-0.283036	-18850	18850	-173.841	-107.482	-141.837	-108.408	-120.903	-122.688	-84.9556
-18.84	-16.7789	-34.5952	-16.7343	2.48792	-18.6836	-31.5929	-0.329188	-18840	18840	-173.967	-107.482	-141.769	-108.385	-121.196	-122.649	-85.1823
-18.83	-16.7936	-34.5864	-16.73	2.49325	-18.7507	-31.5746	-0.360353	-18830	18830	-174.08	-107.448	-141.741	-108.347	-121.519	-122.567	-85.3354
-18.82	-16.8053	-34.5701	-16.7378	2.50209	-18.8134	-31.5476	-0.380386	-18820	18820	-174.171	-107.385	-141.791	-108.283	-121.82	-122.445	-85.4338
-18.81	-16.8165	-34.5529	-16.7536	2.49847	-18.8631	-31.518	-0.395429	-18810	18810	-174.257	-107.319	-141.892	-108.309	-122.059	-122.312	-85.5077
-18.8	-16.8294	-34.5406	-16.771	2.48873	-18.8965	-31.4938	-0.408122	-18800	18800	-174.357	-107.272	-142.003	-108.379	-122.22	-122.203	-85.57
-18.79	-16.8449	-34.5354	-16.7882	2.47702	-18.921	-31.4828	-0.422723	-18790	18790	-174.477	-107.252	-142.113	-108.463	-122.338	-122.154	-85.6417
-18.78	-16.8571	-34.5298	-16.7991	2.47224	-18.9428	-31.479	-0.437662	-18780	18780	-174.571	-107.23	-142.182	-108.497	-122.442	-122.136	-85.7151
-18.77	-16.8625	-34.5232	-16.7975	2.47976	-18.9531	-31.4723	-0.44374	-18770	18770	-174.612	-107.205	-142.172	-108.443	-122.492	-122.106	-85.745
-18.76	-16.858	-34.5124	-16.7825	2.50136	-18.9572	-31.4602	-0.434196	-18760	18760	-174.578	-107.163	-142.076	-108.289	-122.512	-122.052	-85.6981
-18.75	-16.8484	-34.4987	-16.7616	2.53111	-18.9608	-31.4423	-0.411492	-18750	18750	-174.504	-107.11	-141.943	-108.076	-122.529	-121.971	-85.5866
-18.74	-16.8398	-34.4897	-16.7363	2.55887	-18.9642	-31.429	-0.385908	-18740	18740	-174.437	-107.076	-141.781	-107.877	-122.545	-121.911	-85.4609
-18.73	-16.8347	-34.4835	-16.7132	2.5724	-18.9687	-31.4206	-0.365078	-18730	18730	-174.398	-107.052	-141.634	-107.78	-122.567	-121.874	-85.3586
-18.72	-16.8316	-34.4844	-16.6913	2.58174	-18.9641	-31.4208	-0.347706	-18720	18720	-174.374	-107.055	-141.494	-107.713	-122.545	-121.875	-85.2732
-18.71	-16.8298	-34.4924	-16.6797	2.58433	-18.9541	-31.4326	-0.33252	-18710	18710	-174.36	-107.086	-141.42	-107.695	-122.497	-121.928	-85.1987
-18.7	-16.8291	-34.5022	-16.6757	2.58964	-18.9423	-31.4537	-0.319516	-18700	18700	-174.355	-107.124	-141.395	-107.656	-122.44	-122.023	-85.1348
-18.69	-16.8275	-34.5112	-16.6684	2.59906	-18.9376	-31.4822	-0.307921	-18690	18690	-174.342	-107.158	-141.348	-107.589	-122.417	-122.151	-85.0778
-18.68	-16.8233	-34.5193	-16.6558	2.61665	-18.941	-31.5043	-0.294744	-18680	18680	-174.31	-107.19	-141.267	-107.463	-122.434	-122.25	-85.0131
-18.67	-16.8203	-34.5311	-16.6411	2.64456	-18.954	-31.5253	-0.281706	-18670	18670	-174.287	-107.235	-141.174	-107.263	-122.496	-122.345	-84.949
-18.66	-16.8187	-34.5477	-16.6277	2.66874	-18.976	-31.5451	-0.269579	-18660	18660	-174.274	-107.299	-141.088	-107.09	-122.602	-122.434	-84.8895
-18.65	-16.8181	-34.5698	-16.6104	2.68288	-18.9949	-31.5601	-0.258142	-18650	18650	-174.27	-107.384	-140.978	-106.989	-122.693	-122.501	-84.8333
-18.64	-16.8175	-34.5996	-16.5852	2.69649	-19.0052	-31.574	-0.248763	-18640	18640	-174.265	-107.499	-140.817	-106.891	-122.742	-122.564	-84.7872
-18.63	-16.8161	-34.6369	-16.5549	2.70395	-19.0061	-31.5855	-0.241585	-18630	18630	-174.254	-107.643	-140.623	-106.838	-122.747	-122.616	-84.752
-18.62	-16.8109	-34.6737	-16.5178	2.71064	-18.9987	-31.594	-0.235589	-18620	18620	-174.214	-107.784	-140.386	-106.79	-122.711	-122.654	-84.7225
-18.61	-16.8026	-34.7031	-16.476	2.71591	-18.9921	-31.5963	-0.229217	-18610	18610	-174.15	-107.898	-140.12	-106.752	-122.679	-122.664	-84.6912
-18.6	-16.7945	-34.7242	-16.4278	2.71596	-18.9938	-31.5878	-0.232891	-18600	18600	-174.087	-107.979	-139.812	-106.752	-122.688	-122.626	-84.7093
-18.59	-16.7887	-34.7415	-16.3797	2.70945	-19.0089	-31.5719	-0.239926	-18590	18590	-174.043	-108.045	-139.505	-106.799	-122.76	-122.554	-84.7438
-18.58	-16.7835	-34.7503	-16.3307	2.70364	-19.0333	-31.5452	-0.249073	-18580	18580	-174.002	-108.079	-139.192	-106.84	-122.878	-122.434	-84.7887
-18.57	-16.7728	-34.7441	-16.2775	2.70117	-19.0461	-31.5178	-0.253125	-18570	18570	-173.92	-108.055	-138.852	-106.858	-122.939	-122.311	-84.8086
-18.56	-16.7498	-34.7285	-16.2171	2.70141	-19.0335	-31.481	-0.249993	-18560	18560	-173.742	-107.995	-138.467	-106.856	-122.879	-122.145	-84.7933
-18.55	-16.7112	-34.684	-16.1523	2.71546	-18.9923	-31.4343	-0.229404	-18550	18550	-173.444	-107.824	-138.053	-106.756	-122.68	-121.935	-84.6921
-18.54	-16.6587	-34.6262	-16.0881	2.74568	-18.9304	-31.3794	-0.185864	-18540	18540	-173.039	-107.601	-137.643	-106.539	-122.383	-121.688	-84.4782
-18.53	-16.5959	-34.5575	-16.0218	2.78824	-18.8515	-31.3122	-0.128232	-18530	18530	-172.554	-107.337	-137.22	-106.235	-122.003	-121.386	-84.1951
-18.52	-16.5281	-34.4804	-15.9589	2.83712	-18.7656	-31.2367	-0.0592	-18520	18520	-172.031	-107.04	-136.818	-105.885	-121.59	-121.046	-83.856
-18.51	-16.4597	-34.404	-15.8899	2.88949	-18.6751	-31.1587	0.0185	-18510	18510	-171.502	-106.746	-136.378	-105.51	-121.155	-120.695	-83.4744
-18.5	-16.3871	-34.3277	-15.8183	2.94824	-18.5847	-31.0776	0.106626	-18500	18500	-170.942	-106.452	-135.921	-105.089	-120.721	-120.33	-83.0415
-18.49	-16.3092	-34.2501	-15.744	3.01524	-18.4853	-30.993	0.20241	-18490	18490	-170.34	-106.153	-135.446	-104.609	-120.243	-119.949	-82.571
-18.48	-16.2231	-34.1692	-15.6651	3.09516	-18.3685	-30.912	0.306937	-18480	18480	-169.676	-105.841	-134.943	-104.037	-119.681	-119.585	-82.0575
-18.47	-16.1296	-34.0864	-15.5834	3.18606	-18.2394	-30.8392	0.416959	-18470	18470	-168.954	-105.522	-134.421	-103.386	-119.06	-119.257	-81.517
-18.46	-16.0375	-34.0113	-15.5026	3.28399	-18.1139	-30.7755	0.524275	-18460	18460	-168.243	-105.233	-133.905	-102.685	-118.457	-118.971	-80.9899
-18.45	-15.9538	-33.9436	-15.4246	3.38421	-18.0076	-30.7171	0.62241	-18450	18450	-167.596	-104.972	-133.407	-101.968	-117.946	-118.708	-80.5078
-18.44	-15.8835	-33.8885	-15.3534	3.48093	-17.9277	-30.663	0.712854	-18440	18440	-167.054	-104.76	-132.953	-101.275	-117.561	-118.465	-80.0635
-18.43	-15.8295	-33.8404	-15.2969	3.56694	-17.8791	-30.621	0.792823	-18430	18430	-166.637	-104.575	-132.592	-100.66	-117.328	-118.276	-79.6707
-18.42	-15.7905	-33.807	-15.262	3.64303	-17.8526	-30.5876	0.861421	-18420	18420	-166.336	-104.446	-132.369	-100.115	-117.2	-118.125	-79.3338
-18.41	-15.7599	-33.7815	-15.2366	3.71409	-17.8416	-30.5604	0.92053	-18410	18410	-166.099	-104.348	-132.207	-99.606	-117.147	-118.003	-79.0434
-18.4	-15.7317	-33.7587	-15.2168	3.78346	-17.8332	-30.5402	0.974494	-18400	18400	-165.882	-104.26	-132.081	-99.1093	-117.107	-117.912	-78.7783
-18.39	-15.7027	-33.7463	-15.1975	3.84999	-17.8174	-30.5315	1.02119	-18390	18390	-165.658	-104.212	-131.958	-98.633	-117.031	-117.873	-78.5489
-18.38	-15.6747	-33.7396	-15.1795	3.90933	-17.7922	-30.538	1.05708	-18380	18380	-165.442	-104.187	-131.843	-98.2082	-116.91	-117.902	-78.3726
-18.37	-15.65	-33.7428	-15.1654	3.96416	-17.7655	-30.5565	1.08908	-18370	18370	-165.251	-104.199	-131.753	-97.8156	-116.782	-117.985	-78.2154
-18.36	-15.6282	-33.7488	-15.1542	4.01464	-17.738	-30.5742	1.11883	-18360	18360	-165.082	-104.222	-131.681	-97.4542	-116.649	-118.065	-78.0693
-18.35	-15.6079	-33.7577	-15.1433	4.05827	-17.7107	-30.5859	1.14846	-18350	18350	-164.926	-104.256	-131.611	-97.1418	-116.518	-118.118	-77.9238
-18.34	-15.5884	-33.7711	-15.1261	4.09479	-17.6868	-30.5904	1.17813	-18340	18340	-164.775	-104.308	-131.502	-96.8804	-116.403	-118.138	-77.778
-18.33	-15.5692	-33.7882	-15.102	4.12591	-17.6653	-30.5839	1.21036	-18330	18330	-164.627	-104.374	-131.348	-96.6576	-116.3	-118.109	-77.6197
-18.32	-15.5505	-33.8035	-15.0756	4.14883	-17.643	-30.5699	1.24409	-18320	18320	-164.483	-104.433	-131.179	-96.4935	-116.193	-118.046	-77.454
-18.31	-15.5331	-33.814	-15.0534	4.16166	-17.6193	-30.5552	1.27396	-18310	18310	-164.348	-104.473	-131.038	-96.4016	-116.079	-117.979	-77.3073
-18.3	-15.5228	-33.8187	-15.0414	4.1613	-17.6033	-30.5449	1.29287	-18300	18300	-164.269	-104.491	-130.961	-96.4042	-116.002	-117.933	-77.2144
-18.29	-15.5254	-33.818	-15.0412	4.14437	-17.6028	-30.545	1.29342	-18290	18290	-164.289	-104.489	-130.96	-96.5254	-115.999	-117.934	-77.2117
-18.28	-15.5401	-33.8184	-15.0468	4.11804	-17.6184	-30.5498	1.27424	-18280	18280	-164.402	-104.49	-130.995	-96.7139	-116.074	-117.955	-77.3059
-18.27	-15.5642	-33.8199	-15.0557	4.08572	-17.6456	-30.5594	1.2406	-18270	18270	-164.588	-104.496	-131.052	-96.9453	-116.205	-117.998	-77.4711
-18.26	-15.597	-33.8257	-15.0698	4.05147	-17.6866	-30.5719	1.19893	-18260	18260	-164.842	-104.518	-131.142	-97.1905	-116.402	-118.055	-77.6758
-18.25	-15.6336	-33.8306	-15.0896	4.0181	-17.7405	-30.5771	1.15238	-18250	18250	-165.124	-104.537	-131.269	-97.4294	-116.661	-118.078	-77.9045
-18.24	-15.6701	-33.8323	-15.1118	3.98564	-17.8031	-30.577	1.10557	-18240	18240	-165.406	-104.544	-131.41	-97.6618	-116.962	-118.078	-78.1344
-18.23	-15.7066	-33.8328	-15.1362	3.9534	-17.8702	-30.5785	1.06275	-18230	18230	-165.688	-104.546	-131.566	-97.8926	-117.285	-118.084	-78.3448
-18.22	-15.7442	-33.8351	-15.1618	3.92533	-17.9336	-30.5899	1.02228	-18220	18220	-165.978	-104.554	-131.73	-98.0936	-117.59	-118.136	-78.5436
-18.21	-15.7799	-33.8415	-15.194	3.8998	-17.9907	-30.6128	0.979958	-18210	18210	-166.254	-104.579	-131.935	-98.2764	-117.864	-118.239	-78.7515
-18.2	-15.8159	-33.8552	-15.2322	3.88076	-18.0356	-30.6482	0.939074	-18200	18200	-166.532	-104.632	-132.179	-98.4127	-118.08	-118.398	-78.9523
-18.19	-15.8529	-33.8803	-15.2746	3.87313	-18.0739	-30.6937	0.906335	-18190	18190	-166.817	-104.729	-132.45	-98.4673	-118.264	-118.603	-79.1131
-18.18	-15.8882	-33.9199	-15.3181	3.87206	-18.1013	-30.7462	0.884341	-18180	18180	-167.09	-104.881	-132.727	-98.475	-118.396	-118.839	-79.2212
-18.17	-15.9204	-33.9727	-15.3649	3.8784	-18.1138	-30.8028	0.872143	-18170	18170	-167.339	-105.084	-133.026	-98.4296	-118.456	-119.094	-79.2811
-18.16	-15.9494	-34.0332	-15.4091	3.8946	-18.1273	-30.8566	0.872939	-18160	18160	-167.562	-105.317	-133.308	-98.3136	-118.521	-119.336	-79.2772
-18.15	-15.9703	-34.0946	-15.441	3.91488	-18.1297	-30.9014	0.885702	-18150	18150	-167.724	-105.554	-133.512	-98.1684	-118.533	-119.537	-79.2145
-18.14	-15.9801	-34.1499	-15.4559	3.94218	-18.1308	-30.9337	0.914617	-18140	18140	-167.799	-105.767	-133.607	-97.973	-118.538	-119.683	-79.0724
-18.13	-15.9805	-34.1933	-15.4572	3.97212	-18.1197	-30.9509	0.953302	-18130	18130	-167.803	-105.934	-133.615	-97.7586	-118.485	-119.76	-78.8824
-18.12	-15.9727	-34.2246	-15.4512	4.00069	-18.1005	-30.955	0.995721	-18120	18120	-167.742	-106.055	-133.577	-97.5541	-118.392	-119.778	-78.674
-18.11	-15.9594	-34.2464	-15.437	4.04114	-18.0736	-30.9555	1.0406	-18110	18110	-167.64	-106.139	-133.487	-97.2645	-118.263	-119.781	-78.4536
-18.1	-15.9379	-34.2649	-15.4166	4.09123	-18.0393	-30.9586	1.08539	-18100	18100	-167.474	-106.21	-133.356	-96.9058	-118.098	-119.795	-78.2336
-18.09	-15.9077	-34.279	-15.39	4.15272	-17.9953	-30.9603	1.13831	-18090	18090	-167.24	-106.264	-133.186	-96.4656	-117.887	-119.802	-77.9736
-18.08	-15.8668	-34.2823	-15.3486	4.22264	-17.9438	-30.9521	1.19505	-18080	18080	-166.925	-106.277	-132.922	-95.965	-117.639	-119.765	-77.6949
-18.07	-15.8116	-34.2666	-15.2849	4.29858	-17.8877	-30.9251	1.25456	-18070	18070	-166.499	-106.216	-132.515	-95.4213	-117.369	-119.644	-77.4026
-18.06	-15.742	-34.2263	-15.1988	4.37597	-17.8309	-30.872	1.32017	-18060	18060	-165.961	-106.061	-131.966	-94.8673	-117.096	-119.405	-77.0803
-18.05	-15.6594	-34.1619	-15.095	4.46161	-17.7641	-30.7963	1.39356	-18050	18050	-165.323	-105.813	-131.303	-94.2541	-116.775	-119.064	-76.7198
-18.04	-15.5702	-34.0828	-14.986	4.55445	-17.6907	-30.7069	1.4751	-18040	18040	-164.635	-105.508	-130.607	-93.5894	-116.422	-118.662	-76.3192
-18.03	-15.484	-33.9996	-14.8839	4.6441	-17.6088	-30.622	1.55509	-18030	18030	-163.969	-105.188	-129.955	-92.9476	-116.028	-118.28	-75.9263
-18.02	-15.4065	-33.9266	-14.7968	4.71976	-17.5203	-30.5512	1.62962	-18020	18020	-163.371	-104.907	-129.399	-92.4059	-115.603	-117.961	-75.5602
-18.01	-15.3401	-33.8726	-14.7222	4.77537	-17.4331	-30.4966	1.69352	-18010	18010	-162.858	-104.699	-128.923	-92.0077	-115.183	-117.716	-75.2463
-18	-15.2874	-33.8362	-14.6562	4.81257	-17.3575	-30.457	1.74269	-18000	18000	-162.451	-104.559	-128.502	-91.7414	-114.82	-117.538	-75.0048
-17.99	-15.2459	-33.8152	-14.5954	4.83919	-17.2989	-30.414	1.78186	-17990	17990	-162.131	-104.478	-128.114	-91.5508	-114.538	-117.344	-74.8124
-17.98	-15.2119	-33.7975	-14.5374	4.85583	-17.256	-30.3701	1.81305	-17980	17980	-161.868	-104.41	-127.743	-91.4317	-114.332	-117.147	-74.6592
-17.97	-15.1859	-33.785	-14.4834	4.86707	-17.2255	-30.325	1.83852	-17970	17970	-161.668	-104.362	-127.399	-91.3512	-114.185	-116.944	-74.534
-17.96	-15.1677	-33.7663	-14.4403	4.86878	-17.2071	-30.2799	1.86049	-17960	17960	-161.527	-104.29	-127.123	-91.339	-114.097	-116.741	-74.4261
-17.95	-15.1602	-33.7534	-14.4158	4.86294	-17.2009	-30.2414	1.87695	-17950	17950	-161.469	-104.24	-126.967	-91.3808	-114.067	-116.567	-74.3453
-17.94	-15.1622	-33.7392	-14.4088	4.84931	-17.2117	-30.2091	1.88328	-17940	17940	-161.485	-104.185	-126.922	-91.4784	-114.119	-116.422	-74.3142
-17.93	-15.1697	-33.7369	-14.4094	4.83495	-17.2391	-30.1891	1.88076	-17930	17930	-161.542	-104.176	-126.926	-91.5812	-114.25	-116.332	-74.3265
-17.92	-15.1811	-33.7461	-14.4077	4.82292	-17.2707	-30.1846	1.87331	-17920	17920	-161.63	-104.212	-126.915	-91.6673	-114.402	-116.312	-74.3631
-17.91	-15.1925	-33.757	-14.3961	4.8145	-17.3092	-30.1735	1.8652	-17910	17910	-161.718	-104.254	-126.841	-91.7276	-114.588	-116.262	-74.403
-17.9	-15.2003	-33.761	-14.3753	4.81358	-17.3518	-30.1553	1.85868	-17900	17900	-161.779	-104.269	-126.708	-91.7342	-114.792	-116.18	-74.435
-17.89	-15.2012	-33.7573	-14.3536	4.82032	-17.395	-30.1392	1.86114	-17890	17890	-161.786	-104.255	-126.57	-91.6859	-115	-116.108	-74.4229
-17.88	-15.2029	-33.7523	-14.3427	4.83208	-17.4326	-30.1293	1.86837	-17880	17880	-161.799	-104.236	-126.5	-91.6017	-115.181	-116.063	-74.3874
-17.87	-15.2056	-33.7477	-14.3421	4.85066	-17.4742	-30.1236	1.87264	-17870	17870	-161.82	-104.218	-126.497	-91.4687	-115.381	-116.037	-74.3664
-17.86	-15.2108	-33.7439	-14.346	4.86915	-17.5157	-30.1207	1.87049	-17860	17860	-161.86	-104.203	-126.521	-91.3363	-115.58	-116.024	-74.377
-17.85	-15.2169	-33.7446	-14.3462	4.88016	-17.5523	-30.1215	1.85681	-17850	17850	-161.907	-104.206	-126.523	-91.2575	-115.756	-116.028	-74.4442
-17.84	-15.2211	-33.7479	-14.3392	4.89019	-17.5783	-30.1221	1.83421	-17840	17840	-161.939	-104.219	-126.478	-91.1857	-115.881	-116.031	-74.5552
-17.83	-15.2218	-33.7561	-14.3234	4.89722	-17.5921	-30.1289	1.80757	-17830	17830	-161.945	-104.25	-126.377	-91.1354	-115.948	-116.061	-74.6861
-17.82	-15.2198	-33.7704	-14.3061	4.90545	-17.5991	-30.1428	1.78818	-17820	17820	-161.929	-104.305	-126.267	-91.0764	-115.981	-116.124	-74.7813
-17.81	-15.2149	-33.7839	-14.2935	4.92241	-17.59	-30.1577	1.77671	-17810	17810	-161.891	-104.357	-126.186	-90.955	-115.938	-116.191	-74.8377
-17.8	-15.2085	-33.7926	-14.2884	4.93508	-17.5788	-30.1663	1.76348	-17800	17800	-161.842	-104.391	-126.154	-90.8643	-115.884	-116.229	-74.9026
-17.79	-15.2006	-33.7978	-14.29	4.95013	-17.5656	-30.1863	1.75826	-17790	17790	-161.781	-104.411	-126.164	-90.7566	-115.82	-116.319	-74.9283
-17.78	-15.1888	-33.7984	-14.2914	4.96191	-17.5498	-30.206	1.75977	-17780	17780	-161.69	-104.413	-126.173	-90.6722	-115.744	-116.408	-74.9209
-17.77	-15.1743	-33.7891	-14.292	4.97067	-17.5282	-30.2173	1.76263	-17770	17770	-161.578	-104.377	-126.177	-90.6095	-115.641	-116.459	-74.9068
-17.76	-15.1632	-33.7786	-14.2915	4.98027	-17.5043	-30.2221	1.76152	-17760	17760	-161.492	-104.337	-126.173	-90.5408	-115.526	-116.481	-74.9123
-17.75	-15.1519	-33.7716	-14.2843	4.98087	-17.4706	-30.2313	1.76624	-17750	17750	-161.405	-104.31	-126.128	-90.5365	-115.364	-116.522	-74.8891
-17.74	-15.1388	-33.7693	-14.2718	4.97976	-17.4262	-30.239	1.78084	-17740	17740	-161.304	-104.301	-126.048	-90.5444	-115.15	-116.557	-74.8174
-17.73	-15.1261	-33.7686	-14.2599	4.9745	-17.3792	-30.2455	1.80688	-17730	17730	-161.206	-104.298	-125.972	-90.5821	-114.924	-116.586	-74.6895
-17.72	-15.1185	-33.7736	-14.2526	4.96806	-17.3457	-30.2468	1.8407	-17720	17720	-161.147	-104.318	-125.925	-90.6282	-114.763	-116.592	-74.5233
-17.71	-15.1181	-33.7848	-14.247	4.97021	-17.3309	-30.2455	1.87441	-17710	17710	-161.144	-104.361	-125.889	-90.6128	-114.692	-116.586	-74.3577
-17.7	-15.1248	-33.7993	-14.2416	4.97572	-17.3423	-30.2392	1.89853	-17700	17700	-161.196	-104.417	-125.855	-90.5733	-114.747	-116.558	-74.2393
-17.69	-15.1342	-33.8111	-14.2333	4.98315	-17.3756	-30.2253	1.90717	-17690	17690	-161.268	-104.462	-125.802	-90.5201	-114.907	-116.495	-74.1968
-17.68	-15.1436	-33.8224	-14.2176	4.99112	-17.4131	-30.2062	1.90292	-17680	17680	-161.341	-104.506	-125.702	-90.4631	-115.087	-116.409	-74.2177
-17.67	-15.1533	-33.8336	-14.1958	4.98763	-17.4449	-30.1875	1.88738	-17670	17670	-161.416	-104.549	-125.563	-90.4881	-115.24	-116.325	-74.294
-17.66	-15.1627	-33.8516	-14.1721	4.98137	-17.4675	-30.1729	1.87072	-17660	17660	-161.488	-104.618	-125.411	-90.5329	-115.349	-116.259	-74.3759
-17.65	-15.1675	-33.8713	-14.1489	4.98102	-17.4735	-30.1624	1.86069	-17650	17650	-161.525	-104.694	-125.263	-90.5354	-115.378	-116.212	-74.4251
-17.64	-15.1655	-33.8893	-14.1306	4.98531	-17.466	-30.1562	1.86101	-17640	17640	-161.51	-104.763	-125.146	-90.5047	-115.341	-116.184	-74.4236
-17.63	-15.1587	-33.9042	-14.1161	4.99905	-17.4479	-30.1563	1.86799	-17630	17630	-161.458	-104.821	-125.054	-90.4063	-115.254	-116.184	-74.3893
-17.62	-15.1469	-33.9139	-14.1068	5.02436	-17.4262	-30.1659	1.87934	-17620	17620	-161.366	-104.858	-124.994	-90.2251	-115.15	-116.228	-74.3335
-17.61	-15.1317	-33.9142	-14.1074	5.05499	-17.4017	-30.1769	1.89284	-17610	17610	-161.249	-104.859	-124.998	-90.0058	-115.032	-116.277	-74.2672
-17.6	-15.1118	-33.9036	-14.1151	5.08273	-17.3735	-30.1865	1.90732	-17600	17600	-161.095	-104.818	-125.047	-89.8072	-114.897	-116.32	-74.1961
-17.59	-15.0906	-33.8916	-14.1219	5.10401	-17.34	-30.1939	1.92123	-17590	17590	-160.932	-104.772	-125.091	-89.6549	-114.736	-116.354	-74.1277
-17.58	-15.0694	-33.8804	-14.1259	5.12478	-17.3027	-30.2043	1.94093	-17580	17580	-160.768	-104.729	-125.116	-89.5061	-114.556	-116.4	-74.031
-17.57	-15.0484	-33.8762	-14.1261	5.14861	-17.2628	-30.217	1.97021	-17570	17570	-160.606	-104.713	-125.118	-89.3355	-114.364	-116.458	-73.8871
-17.56	-15.0261	-33.8761	-14.1187	5.1779	-17.2239	-30.2254	2.00896	-17560	17560	-160.434	-104.712	-125.07	-89.1258	-114.177	-116.495	-73.6968
-17.55	-15.0033	-33.8759	-14.1083	5.21763	-17.1929	-30.2329	2.0577	-17550	17550	-160.258	-104.712	-125.004	-88.8414	-114.028	-116.529	-73.4574
-17.54	-14.9797	-33.8787	-14.0975	5.26223	-17.1705	-30.2359	2.10734	-17540	17540	-160.075	-104.722	-124.935	-88.5221	-113.921	-116.543	-73.2135
-17.53	-14.9566	-33.873	-14.0882	5.30565	-17.1532	-30.2236	2.14921	-17530	17530	-159.897	-104.7	-124.876	-88.2112	-113.837	-116.487	-73.0079
-17.52	-14.934	-33.8605	-14.0798	5.33886	-17.1369	-30.2006	2.18167	-17520	17520	-159.723	-104.652	-124.822	-87.9734	-113.759	-116.384	-72.8484
-17.51	-14.9111	-33.8428	-14.0667	5.36342	-17.12	-30.1766	2.20616	-17510	17510	-159.546	-104.584	-124.738	-87.7976	-113.678	-116.276	-72.7281
-17.5	-14.8873	-33.8172	-14.0435	5.38493	-17.1037	-30.1439	2.22519	-17500	17500	-159.362	-104.486	-124.59	-87.6436	-113.599	-116.129	-72.6346
-17.49	-14.8639	-33.7957	-14.0113	5.40604	-17.0903	-30.1125	2.23954	-17490	17490	-159.181	-104.403	-124.385	-87.4925	-113.535	-115.987	-72.5641
-17.48	-14.843	-33.7729	-13.9721	5.42793	-17.0771	-30.0829	2.25551	-17480	17480	-159.02	-104.315	-124.134	-87.3357	-113.471	-115.854	-72.4857
-17.47	-14.8187	-33.7542	-13.928	5.45042	-17.0576	-30.0543	2.27835	-17470	17470	-158.832	-104.243	-123.853	-87.1747	-113.378	-115.725	-72.3735
-17.46	-14.7931	-33.731	-13.885	5.47249	-17.0341	-30.0315	2.3061	-17460	17460	-158.635	-104.154	-123.578	-87.0167	-113.265	-115.623	-72.2372
-17.45	-14.7663	-33.6985	-13.8465	5.49219	-17.001	-30.0064	2.33604	-17450	17450	-158.428	-104.028	-123.333	-86.8757	-113.106	-115.51	-72.0901
-17.44	-14.7356	-33.6545	-13.8146	5.5113	-16.9552	-29.977	2.37062	-17440	17440	-158.191	-103.859	-123.129	-86.7389	-112.885	-115.378	-71.9202
-17.43	-14.7012	-33.6039	-13.7905	5.53252	-16.8985	-29.9399	2.40985	-17430	17430	-157.925	-103.664	-122.975	-86.5869	-112.613	-115.211	-71.7275
-17.42	-14.666	-33.5442	-13.7751	5.55413	-16.837	-29.8983	2.44741	-17420	17420	-157.653	-103.434	-122.877	-86.4322	-112.317	-115.024	-71.543
-17.41	-14.6326	-33.4799	-13.7688	5.57669	-16.7822	-29.8541	2.48233	-17410	17410	-157.396	-103.186	-122.836	-86.2707	-112.054	-114.825	-71.3715
-17.4	-14.6049	-33.4186	-13.7668	5.59466	-16.7455	-29.8052	2.5136	-17400	17400	-157.182	-102.95	-122.824	-86.142	-111.877	-114.605	-71.2179
-17.39	-14.5853	-33.3701	-13.7691	5.61146	-16.7325	-29.7588	2.54031	-17390	17390	-157.03	-102.764	-122.838	-86.0218	-111.815	-114.396	-71.0867
-17.38	-14.5717	-33.3392	-13.7707	5.63164	-16.7318	-29.7206	2.5651	-17380	17380	-156.925	-102.645	-122.849	-85.8773	-111.811	-114.224	-70.9649
-17.37	-14.5629	-33.3279	-13.7751	5.65192	-16.7372	-29.6949	2.58603	-17370	17370	-156.857	-102.601	-122.877	-85.7321	-111.837	-114.108	-70.8621
-17.36	-14.5562	-33.3281	-13.7812	5.66313	-16.7339	-29.6804	2.59865	-17360	17360	-156.806	-102.602	-122.916	-85.6518	-111.821	-114.043	-70.8001
-17.35	-14.5526	-33.3363	-13.7866	5.65938	-16.7213	-29.678	2.60543	-17350	17350	-156.778	-102.633	-122.95	-85.6787	-111.761	-114.032	-70.7668
-17.34	-14.554	-33.3536	-13.7942	5.65856	-16.7015	-29.6826	2.60421	-17340	17340	-156.789	-102.7	-122.999	-85.6845	-111.665	-114.053	-70.7728
-17.33	-14.5587	-33.3754	-13.802	5.64515	-16.6798	-29.6875	2.59264	-17330	17330	-156.825	-102.784	-123.048	-85.7806	-111.561	-114.075	-70.8296
-17.32	-14.5696	-33.4048	-13.8039	5.62089	-16.6627	-29.6919	2.57453	-17320	17320	-156.909	-102.897	-123.061	-85.9542	-111.479	-114.095	-70.9186
-17.31	-14.5834	-33.4436	-13.7998	5.58508	-16.6571	-29.6988	2.54853	-17310	17310	-157.016	-103.047	-123.034	-86.2106	-111.452	-114.126	-71.0463
-17.3	-14.5978	-33.4876	-13.7814	5.55373	-16.661	-29.7104	2.52189	-17300	17300	-157.127	-103.216	-122.917	-86.4351	-111.471	-114.178	-71.1772
-17.29	-14.6033	-33.5352	-13.743	5.5366	-16.6742	-29.7276	2.50342	-17290	17290	-157.169	-103.399	-122.672	-86.5577	-111.534	-114.255	-71.2679
-17.28	-14.6003	-33.5787	-13.6829	5.52722	-16.6819	-29.7428	2.49124	-17280	17280	-157.146	-103.567	-122.288	-86.6249	-111.571	-114.324	-71.3277
-17.27	-14.5879	-33.6074	-13.6088	5.53872	-16.676	-29.7467	2.49929	-17270	17270	-157.05	-103.678	-121.815	-86.5425	-111.543	-114.341	-71.2882
-17.26	-14.5601	-33.6211	-13.5294	5.57488	-16.6482	-29.7394	2.52366	-17260	17260	-156.836	-103.73	-121.308	-86.2837	-111.409	-114.308	-71.1685
-17.25	-14.5217	-33.6172	-13.454	5.62495	-16.6032	-29.7217	2.56366	-17250	17250	-156.539	-103.715	-120.827	-85.9252	-111.193	-114.229	-70.972
-17.24	-14.4778	-33.6009	-13.3843	5.68464	-16.5522	-29.6905	2.62048	-17240	17240	-156.2	-103.652	-120.382	-85.4978	-110.948	-114.088	-70.6929
-17.23	-14.4352	-33.5816	-13.322	5.74429	-16.5097	-29.6496	2.68573	-17230	17230	-155.871	-103.578	-119.984	-85.0708	-110.743	-113.904	-70.3724
-17.22	-14.3971	-33.5594	-13.2717	5.80912	-16.478	-29.6057	2.75353	-17220	17220	-155.577	-103.493	-119.663	-84.6066	-110.591	-113.707	-70.0393
-17.21	-14.3612	-33.5372	-13.2313	5.8754	-16.4537	-29.5617	2.82033	-17210	17210	-155.3	-103.407	-119.405	-84.1321	-110.474	-113.509	-69.7112
-17.2	-14.3247	-33.5095	-13.1944	5.9434	-16.4323	-29.5191	2.88693	-17200	17200	-155.018	-103.3	-119.169	-83.6452	-110.371	-113.317	-69.384
-17.19	-14.2882	-33.4786	-13.1592	6.00774	-16.4088	-29.479	2.95014	-17190	17190	-154.736	-103.181	-118.945	-83.1846	-110.258	-113.137	-69.0735
-17.18	-14.2508	-33.439	-13.1282	6.06311	-16.3798	-29.4438	3.0041	-17180	17180	-154.448	-103.029	-118.747	-82.7882	-110.119	-112.978	-68.8085
-17.17	-14.2206	-33.3939	-13.1056	6.11239	-16.3579	-29.4105	3.04653	-17170	17170	-154.214	-102.855	-118.603	-82.4354	-110.013	-112.828	-68.6
-17.16	-14.2032	-33.3453	-13.0929	6.14314	-16.3458	-29.3728	3.0768	-17160	17160	-154.08	-102.668	-118.521	-82.2152	-109.955	-112.659	-68.4513
-17.15	-14.1861	-33.2959	-13.0889	6.16343	-16.3393	-29.3338	3.09569	-17150	17150	-153.948	-102.478	-118.496	-82.0699	-109.924	-112.483	-68.3585
-17.14	-14.1733	-33.2459	-13.0881	6.17444	-16.3389	-29.2996	3.10731	-17140	17140	-153.849	-102.285	-118.491	-81.9911	-109.922	-112.329	-68.3015
-17.13	-14.1603	-33.1959	-13.0838	6.18866	-16.3393	-29.2718	3.11601	-17130	17130	-153.749	-102.093	-118.463	-81.8893	-109.924	-112.204	-68.2587
-17.12	-14.1391	-33.1476	-13.0784	6.20204	-16.3409	-29.2541	3.12303	-17120	17120	-153.585	-101.907	-118.429	-81.7935	-109.932	-112.125	-68.2242
-17.11	-14.1175	-33.1061	-13.0702	6.21779	-16.3429	-29.2496	3.12928	-17110	17110	-153.418	-101.747	-118.377	-81.6807	-109.941	-112.104	-68.1935
-17.1	-14.0955	-33.0713	-13.0614	6.23742	-16.338	-29.2558	3.13607	-17100	17100	-153.249	-101.613	-118.32	-81.5402	-109.918	-112.132	-68.1602
-17.09	-14.0717	-33.0457	-13.0472	6.26035	-16.3271	-29.2693	3.14592	-17090	17090	-153.065	-101.514	-118.23	-81.376	-109.865	-112.193	-68.1118
-17.08	-14.0464	-33.0261	-13.0285	6.2894	-16.3125	-29.2869	3.16339	-17080	17080	-152.87	-101.439	-118.11	-81.168	-109.795	-112.272	-68.026
-17.07	-14.0201	-33.0046	-13.0046	6.32376	-16.3003	-29.2949	3.18766	-17070	17070	-152.666	-101.356	-117.958	-80.922	-109.736	-112.308	-67.9068
-17.06	-13.9937	-32.9794	-12.9761	6.3583	-16.2928	-29.286	3.2152	-17060	17060	-152.463	-101.259	-117.776	-80.6748	-109.7	-112.268	-67.7715
-17.05	-13.9747	-32.9557	-12.9532	6.38384	-16.2912	-29.2679	3.23637	-17050	17050	-152.316	-101.168	-117.63	-80.4919	-109.693	-112.187	-67.6675
-17.04	-13.9724	-32.9466	-12.9463	6.38478	-16.293	-29.2594	3.23985	-17040	17040	-152.298	-101.132	-117.586	-80.4852	-109.701	-112.149	-67.6504
-17.03	-13.9903	-32.9567	-12.959	6.37027	-16.3034	-29.2696	3.2188	-17030	17030	-152.436	-101.171	-117.667	-80.5891	-109.751	-112.194	-67.7538
-17.02	-14.029	-32.985	-12.9944	6.32505	-16.3153	-29.3003	3.1817	-17020	17020	-152.735	-101.28	-117.893	-80.9128	-109.809	-112.333	-67.936
-17.01	-14.0818	-33.0213	-13.0477	6.26065	-16.3386	-29.342	3.1222	-17010	17010	-153.143	-101.42	-118.233	-81.3739	-109.921	-112.52	-68.2283
-17	-14.1415	-33.0557	-13.1103	6.18603	-16.3781	-29.3793	3.04892	-17000	17000	-153.604	-101.553	-118.633	-81.9081	-110.11	-112.688	-68.5883
-16.99	-14.203	-33.0855	-13.1755	6.11412	-16.4262	-29.4044	2.97512	-16990	16990	-154.079	-101.667	-119.049	-82.423	-110.342	-112.801	-68.9508
-16.98	-14.2621	-33.1122	-13.2378	6.04452	-16.475	-29.4199	2.90327	-16980	16980	-154.535	-101.77	-119.447	-82.9213	-110.576	-112.871	-69.3038
-16.97	-14.3165	-33.1355	-13.295	5.97989	-16.5205	-29.4288	2.83392	-16970	16970	-154.955	-101.86	-119.812	-83.384	-110.795	-112.911	-69.6444
-16.96	-14.37	-33.1642	-13.3479	5.91159	-16.5645	-29.4451	2.7633	-16960	16960	-155.368	-101.971	-120.149	-83.873	-111.007	-112.984	-69.9913
-16.95	-14.4245	-33.2032	-13.4017	5.85222	-16.6073	-29.4726	2.69414	-16950	16950	-155.789	-102.121	-120.493	-84.298	-111.213	-113.108	-70.331
-16.94	-14.4799	-33.2498	-13.4635	5.78808	-16.6435	-29.5106	2.63622	-16940	16940	-156.217	-102.3	-120.887	-84.7572	-111.387	-113.279	-70.6156
-16.93	-14.5312	-33.3006	-13.5311	5.74387	-16.6725	-29.5573	2.59267	-16930	16930	-156.613	-102.496	-121.319	-85.0738	-111.526	-113.489	-70.8295
-16.92	-14.5706	-33.3472	-13.593	5.71715	-16.6977	-29.5987	2.55967	-16920	16920	-156.917	-102.675	-121.714	-85.2651	-111.647	-113.675	-70.9916
-16.91	-14.5916	-33.3786	-13.6312	5.70381	-16.7139	-29.6287	2.53689	-16910	16910	-157.079	-102.796	-121.958	-85.3606	-111.725	-113.81	-71.1035
-16.9	-14.5916	-33.3884	-13.6461	5.70453	-16.7183	-29.629	2.52919	-16900	16900	-157.079	-102.834	-122.053	-85.3554	-111.746	-113.812	-71.1413
-16.89	-14.5761	-33.3821	-13.6388	5.71887	-16.7115	-29.6139	2.53577	-16890	16890	-156.959	-102.81	-122.007	-85.2528	-111.714	-113.744	-71.109
-16.88	-14.5561	-33.3752	-13.6168	5.73951	-16.701	-29.5863	2.55094	-16880	16880	-156.805	-102.783	-121.866	-85.105	-111.663	-113.62	-71.0345
-16.87	-14.54	-33.3736	-13.5968	5.76365	-16.6967	-29.5595	2.56926	-16870	16870	-156.681	-102.777	-121.738	-84.9322	-111.642	-113.499	-70.9445
-16.86	-14.5301	-33.3801	-13.5856	5.78915	-16.6985	-29.5477	2.58261	-16860	16860	-156.604	-102.802	-121.667	-84.7496	-111.651	-113.446	-70.8789
-16.85	-14.5248	-33.3879	-13.5858	5.8109	-16.7075	-29.5461	2.58621	-16850	16850	-156.563	-102.832	-121.668	-84.5939	-111.694	-113.439	-70.8612
-16.84	-14.5262	-33.3907	-13.5937	5.83208	-16.7202	-29.5477	2.58212	-16840	16840	-156.574	-102.843	-121.719	-84.4422	-111.755	-113.446	-70.8813
-16.83	-14.5301	-33.3898	-13.607	5.84829	-16.7372	-29.5514	2.57382	-16830	16830	-156.604	-102.839	-121.804	-84.3262	-111.837	-113.463	-70.9221
-16.82	-14.5316	-33.3859	-13.6219	5.85971	-16.7539	-29.5564	2.56562	-16820	16820	-156.616	-102.824	-121.899	-84.2444	-111.917	-113.485	-70.9624
-16.81	-14.5335	-33.3762	-13.6354	5.86952	-16.765	-29.5606	2.5616	-16810	16810	-156.63	-102.787	-121.985	-84.1742	-111.971	-113.504	-70.9821
-16.8	-14.5334	-33.3628	-13.6423	5.88152	-16.7776	-29.5548	2.56068	-16800	16800	-156.63	-102.735	-122.029	-84.0883	-112.031	-113.478	-70.9866
-16.79	-14.53	-33.3505	-13.637	5.89568	-16.7946	-29.5493	2.56337	-16790	16790	-156.603	-102.688	-121.995	-83.9869	-112.113	-113.453	-70.9734
-16.78	-14.5267	-33.3393	-13.6239	5.91534	-16.8025	-29.5416	2.56855	-16780	16780	-156.578	-102.645	-121.911	-83.8461	-112.151	-113.418	-70.948
-16.77	-14.5226	-33.323	-13.6092	5.93302	-16.8113	-29.5338	2.57092	-16770	16770	-156.546	-102.582	-121.818	-83.7196	-112.193	-113.383	-70.9363
-16.76	-14.5172	-33.3007	-13.5938	5.94121	-16.8159	-29.5197	2.56814	-16760	16760	-156.505	-102.496	-121.719	-83.6609	-112.216	-113.32	-70.95
-16.75	-14.511	-33.2715	-13.5743	5.94338	-16.8185	-29.5043	2.56226	-16750	16750	-156.457	-102.384	-121.595	-83.6454	-112.228	-113.251	-70.9789
-16.74	-14.5017	-33.2356	-13.5428	5.94876	-16.8094	-29.4846	2.55842	-16740	16740	-156.385	-102.246	-121.394	-83.6069	-112.184	-113.162	-70.9977
-16.73	-14.4843	-33.195	-13.5019	5.94604	-16.7862	-29.4612	2.56444	-16730	16730	-156.251	-102.089	-121.133	-83.6263	-112.073	-113.057	-70.9682
-16.72	-14.458	-33.1488	-13.4517	5.94824	-16.7476	-29.4343	2.58266	-16720	16720	-156.047	-101.911	-120.812	-83.6106	-111.887	-112.936	-70.8787
-16.71	-14.4252	-33.101	-13.3965	5.95604	-16.7074	-29.4038	2.6126	-16710	16710	-155.794	-101.727	-120.46	-83.5547	-111.694	-112.798	-70.7316
-16.7	-14.3902	-33.0537	-13.3434	5.97771	-16.6668	-29.3674	2.65162	-16700	16700	-155.524	-101.545	-120.121	-83.3996	-111.499	-112.635	-70.5399
-16.69	-14.3567	-33.0072	-13.2909	5.99617	-16.6322	-29.3204	2.6849	-16690	16690	-155.265	-101.366	-119.786	-83.2674	-111.332	-112.423	-70.3764
-16.68	-14.3219	-32.9655	-13.2344	6.01892	-16.6033	-29.2663	2.71912	-16680	16680	-154.997	-101.205	-119.425	-83.1046	-111.193	-112.18	-70.2083
-16.67	-14.2811	-32.9206	-13.1691	6.04416	-16.5701	-29.2027	2.75768	-16670	16670	-154.682	-101.032	-119.008	-82.9238	-111.034	-111.893	-70.0189
-16.66	-14.2356	-32.865	-13.1019	6.08281	-16.5314	-29.1299	2.79886	-16660	16660	-154.33	-100.818	-118.579	-82.6471	-110.848	-111.566	-69.8166
-16.65	-14.1907	-32.8067	-13.0447	6.12587	-16.489	-29.0593	2.84305	-16650	16650	-153.984	-100.594	-118.214	-82.3388	-110.644	-111.248	-69.5996
-16.64	-14.1519	-32.7546	-13	6.16422	-16.4472	-29.0022	2.88082	-16640	16640	-153.684	-100.393	-117.928	-82.0643	-110.443	-110.991	-69.414
-16.63	-14.1202	-32.7069	-12.9637	6.19296	-16.4063	-28.9511	2.90915	-16630	16630	-153.439	-100.209	-117.697	-81.8585	-110.246	-110.761	-69.2749
-16.62	-14.0948	-32.6701	-12.9368	6.21041	-16.3698	-28.9095	2.9275	-16620	16620	-153.243	-100.068	-117.525	-81.7336	-110.071	-110.574	-69.1847
-16.61	-14.0741	-32.643	-12.9123	6.21756	-16.337	-28.8758	2.93652	-16610	16610	-153.083	-99.9632	-117.368	-81.6824	-109.913	-110.422	-69.1404
-16.6	-14.0576	-32.6242	-12.8853	6.21813	-16.3137	-28.8451	2.92101	-16600	16600	-152.956	-99.8908	-117.196	-81.6783	-109.801	-110.284	-69.2166
-16.59	-14.0442	-32.6099	-12.8567	6.22067	-16.304	-28.8167	2.90164	-16590	16590	-152.853	-99.8357	-117.014	-81.6601	-109.754	-110.156	-69.3118
-16.58	-14.0361	-32.5965	-12.8286	6.22448	-16.299	-28.7907	2.88106	-16580	16580	-152.79	-99.7841	-116.834	-81.6328	-109.73	-110.039	-69.4129
-16.57	-14.0299	-32.5854	-12.8074	6.22564	-16.2972	-28.7715	2.85768	-16570	16570	-152.742	-99.7414	-116.699	-81.6245	-109.721	-109.953	-69.5277
-16.56	-14.0295	-32.578	-12.799	6.22039	-16.299	-28.7628	2.83515	-16560	16560	-152.739	-99.7129	-116.645	-81.6621	-109.73	-109.914	-69.6384
-16.55	-14.0324	-32.5751	-12.795	6.20777	-16.3043	-28.7631	2.81735	-16550	16550	-152.761	-99.7017	-116.62	-81.7525	-109.756	-109.915	-69.7258
-16.54	-14.0387	-32.5737	-12.7891	6.18709	-16.3137	-28.7653	2.79648	-16540	16540	-152.81	-99.6963	-116.582	-81.9005	-109.801	-109.925	-69.8283
-16.53	-14.041	-32.5776	-12.7754	6.16981	-16.3249	-28.7742	2.77579	-16530	16530	-152.828	-99.7113	-116.494	-82.0243	-109.855	-109.965	-69.93
-16.52	-14.0386	-32.5911	-12.7467	6.1541	-16.339	-28.7915	2.75783	-16520	16520	-152.809	-99.7633	-116.311	-82.1367	-109.922	-110.043	-70.0182
-16.51	-14.0316	-32.609	-12.7025	6.14881	-16.3577	-28.8051	2.74203	-16510	16510	-152.755	-99.8323	-116.029	-82.1746	-110.012	-110.104	-70.0958
-16.5	-14.0209	-32.6152	-12.6598	6.15473	-16.3785	-28.8019	2.73504	-16500	16500	-152.673	-99.8561	-115.756	-82.1322	-110.112	-110.09	-70.1301
-16.49	-14.0117	-32.613	-12.6277	6.17017	-16.4027	-28.786	2.73686	-16490	16490	-152.602	-99.8477	-115.552	-82.0217	-110.229	-110.018	-70.1212
-16.48	-14.0023	-32.6084	-12.6039	6.18742	-16.4223	-28.7725	2.74915	-16480	16480	-152.529	-99.8299	-115.4	-81.8982	-110.323	-109.958	-70.0608
-16.47	-13.9924	-32.6038	-12.5831	6.20453	-16.4347	-28.7609	2.77197	-16470	16470	-152.453	-99.8122	-115.267	-81.7757	-110.383	-109.905	-69.9487
-16.46	-13.9796	-32.5995	-12.5602	6.22048	-16.437	-28.7526	2.80199	-16460	16460	-152.354	-99.7957	-115.121	-81.6615	-110.394	-109.868	-69.8013
-16.45	-13.9672	-32.5985	-12.5328	6.23642	-16.4368	-28.7455	2.83218	-16450	16450	-152.258	-99.7918	-114.946	-81.5474	-110.393	-109.836	-69.653
-16.44	-13.9565	-32.6007	-12.5032	6.24958	-16.4376	-28.7416	2.85349	-16440	16440	-152.175	-99.8003	-114.757	-81.4531	-110.397	-109.819	-69.5483
-16.43	-13.9489	-32.6074	-12.4765	6.26307	-16.439	-28.7403	2.86875	-16430	16430	-152.117	-99.8261	-114.586	-81.3566	-110.403	-109.813	-69.4733
-16.42	-13.9408	-32.616	-12.4584	6.27869	-16.4369	-28.7391	2.88534	-16420	16420	-152.054	-99.8592	-114.471	-81.2447	-110.393	-109.807	-69.3918
-16.41	-13.9335	-32.6205	-12.4528	6.29386	-16.4309	-28.7312	2.90076	-16410	16410	-151.998	-99.8765	-114.435	-81.1361	-110.364	-109.772	-69.3161
-16.4	-13.9244	-32.6145	-12.4559	6.31222	-16.415	-28.7142	2.91857	-16400	16400	-151.928	-99.8534	-114.455	-81.0047	-110.288	-109.695	-69.2286
-16.39	-13.9088	-32.597	-12.4564	6.33711	-16.3851	-28.6927	2.94687	-16390	16390	-151.807	-99.786	-114.458	-80.8265	-110.144	-109.599	-69.0896
-16.38	-13.8813	-32.5672	-12.4447	6.37279	-16.3352	-28.6652	2.98884	-16380	16380	-151.595	-99.6713	-114.383	-80.571	-109.904	-109.475	-68.8834
-16.37	-13.8379	-32.5255	-12.4132	6.4141	-16.2729	-28.6311	3.04068	-16370	16370	-151.26	-99.5107	-114.182	-80.2753	-109.605	-109.321	-68.6288
-16.36	-13.7851	-32.4755	-12.3669	6.46037	-16.1998	-28.5922	3.09414	-16360	16360	-150.852	-99.3181	-113.887	-79.944	-109.253	-109.146	-68.3662
-16.35	-13.7286	-32.4209	-12.3186	6.50533	-16.1197	-28.5519	3.14701	-16350	16350	-150.416	-99.1078	-113.578	-79.6221	-108.868	-108.965	-68.1065
-16.34	-13.6747	-32.3661	-12.2757	6.54557	-16.0429	-28.5126	3.19219	-16340	16340	-150	-98.8967	-113.304	-79.334	-108.499	-108.788	-67.8845
-16.33	-13.6248	-32.3071	-12.2334	6.58146	-15.9753	-28.4713	3.22852	-16330	16330	-149.614	-98.6695	-113.034	-79.077	-108.174	-108.602	-67.7061
-16.32	-13.5786	-32.2463	-12.1923	6.61258	-15.9168	-28.4312	3.25751	-16320	16320	-149.258	-98.4353	-112.772	-78.8542	-107.892	-108.422	-67.5637
-16.31	-13.534	-32.1921	-12.1538	6.6431	-15.8611	-28.4044	3.28693	-16310	16310	-148.913	-98.2266	-112.526	-78.6357	-107.625	-108.301	-67.4191
-16.3	-13.4892	-32.1418	-12.1183	6.67441	-15.8035	-28.3834	3.32178	-16300	16300	-148.567	-98.0329	-112.299	-78.4116	-107.348	-108.207	-67.2479
-16.29	-13.4455	-32.0937	-12.0873	6.70592	-15.7464	-28.3654	3.3572	-16290	16290	-148.23	-97.8476	-112.102	-78.186	-107.073	-108.126	-67.074
-16.28	-13.4059	-32.046	-12.0595	6.73599	-15.6954	-28.3376	3.39027	-16280	16280	-147.924	-97.6639	-111.924	-77.9707	-106.828	-108.001	-66.9115
-16.27	-13.3725	-31.9955	-12.0412	6.76537	-15.6549	-28.2999	3.42216	-16270	16270	-147.666	-97.4694	-111.807	-77.7603	-106.633	-107.831	-66.7549
-16.26	-13.3466	-31.9436	-12.0364	6.79493	-15.6259	-28.2537	3.45336	-16260	16260	-147.466	-97.2695	-111.777	-77.5487	-106.494	-107.623	-66.6016
-16.25	-13.3292	-31.9001	-12.0416	6.8203	-15.6095	-28.2191	3.47565	-16250	16250	-147.332	-97.102	-111.81	-77.3671	-106.415	-107.467	-66.4921
-16.24	-13.3204	-31.8625	-12.0576	6.83698	-15.6035	-28.1888	3.48746	-16240	16240	-147.264	-96.9572	-111.912	-77.2476	-106.386	-107.331	-66.4341
-16.23	-13.3206	-31.836	-12.0868	6.84698	-15.6039	-28.1731	3.4902	-16230	16230	-147.266	-96.8551	-112.098	-77.1761	-106.388	-107.26	-66.4206
-16.22	-13.3259	-31.8196	-12.119	6.85379	-15.6079	-28.1743	3.49304	-16220	16220	-147.307	-96.7919	-112.304	-77.1273	-106.407	-107.266	-66.4067
-16.21	-13.3339	-31.818	-12.1485	6.85775	-15.6098	-28.1863	3.49779	-16210	16210	-147.368	-96.7858	-112.492	-77.0989	-106.416	-107.32	-66.3833
-16.2	-13.3417	-31.8267	-12.1701	6.86052	-15.61	-28.192	3.50332	-16200	16200	-147.429	-96.8193	-112.63	-77.0791	-106.417	-107.345	-66.3562
-16.19	-13.3491	-31.8441	-12.1839	6.85997	-15.6136	-28.1919	3.51059	-16190	16190	-147.486	-96.8863	-112.718	-77.0831	-106.434	-107.345	-66.3205
-16.18	-13.3583	-31.871	-12.1952	6.85921	-15.6192	-28.1964	3.51953	-16180	16180	-147.557	-96.9899	-112.79	-77.0885	-106.461	-107.365	-66.2766
-16.17	-13.3685	-31.9012	-12.2051	6.85716	-15.6251	-28.216	3.52645	-16170	16170	-147.635	-97.1062	-112.854	-77.1032	-106.49	-107.453	-66.2426
-16.16	-13.3797	-31.9297	-12.2121	6.85258	-15.6279	-28.2503	3.52799	-16160	16160	-147.722	-97.216	-112.898	-77.136	-106.503	-107.608	-66.235
-16.15	-13.3954	-31.9662	-12.2197	6.84098	-15.6298	-28.2999	3.52248	-16150	16150	-147.843	-97.3566	-112.947	-77.219	-106.512	-107.831	-66.2621
-16.14	-13.4172	-32.0202	-12.2343	6.8217	-15.6286	-28.3705	3.51228	-16140	16140	-148.011	-97.5645	-113.04	-77.357	-106.507	-108.149	-66.3122
-16.13	-13.4435	-32.0949	-12.2518	6.7967	-15.6242	-28.4551	3.50175	-16130	16130	-148.215	-97.8522	-113.152	-77.536	-106.485	-108.529	-66.3639
-16.12	-13.4708	-32.182	-12.2663	6.76749	-15.6151	-28.5391	3.48977	-16120	16120	-148.425	-98.1877	-113.244	-77.7452	-106.442	-108.907	-66.4227
-16.11	-13.4943	-32.2713	-12.2735	6.74432	-15.6043	-28.6163	3.48149	-16110	16110	-148.607	-98.5316	-113.29	-77.911	-106.39	-109.255	-66.4634
-16.1	-13.51	-32.3447	-12.2714	6.73292	-15.5992	-28.6715	3.48272	-16100	16100	-148.728	-98.8143	-113.277	-77.9927	-106.365	-109.503	-66.4574
-16.09	-13.5169	-32.3969	-12.2605	6.73622	-15.6006	-28.7116	3.492	-16090	16090	-148.781	-99.0154	-113.207	-77.969	-106.372	-109.684	-66.4118
-16.08	-13.5159	-32.4278	-12.2425	6.75228	-15.6062	-28.7343	3.50706	-16080	16080	-148.774	-99.1344	-113.092	-77.8541	-106.399	-109.786	-66.3378
-16.07	-13.5081	-32.4437	-12.2262	6.77315	-15.6056	-28.7404	3.5275	-16070	16070	-148.713	-99.1956	-112.988	-77.7046	-106.396	-109.813	-66.2374
-16.06	-13.4938	-32.4373	-12.2114	6.79735	-15.6002	-28.7243	3.55184	-16060	16060	-148.603	-99.171	-112.894	-77.5314	-106.37	-109.741	-66.1178
-16.05	-13.4741	-32.4191	-12.198	6.83089	-15.5956	-28.6884	3.58463	-16050	16050	-148.451	-99.1009	-112.808	-77.2913	-106.348	-109.579	-65.9568
-16.04	-13.4493	-32.3967	-12.1745	6.87118	-15.5903	-28.6359	3.62202	-16040	16040	-148.259	-99.0146	-112.658	-77.0028	-106.322	-109.343	-65.7731
-16.03	-13.4213	-32.3638	-12.1428	6.91725	-15.5888	-28.5575	3.66095	-16030	16030	-148.043	-98.8879	-112.456	-76.673	-106.315	-108.99	-65.5819
-16.02	-13.3909	-32.3257	-12.1044	6.96866	-15.5979	-28.4679	3.69892	-16020	16020	-147.808	-98.7411	-112.211	-76.3049	-106.359	-108.587	-65.3954
-16.01	-13.3583	-32.2699	-12.0607	7.01756	-15.6122	-28.3731	3.73237	-16010	16010	-147.557	-98.5262	-111.932	-75.9548	-106.428	-108.16	-65.231
-16	-13.3199	-32.1962	-12.0132	7.06963	-15.6206	-28.2769	3.76556	-16000	16000	-147.26	-98.2424	-111.629	-75.582	-106.468	-107.727	-65.068
-15.99	-13.2736	-32.11	-11.9663	7.12806	-15.6143	-28.1806	3.80397	-15990	15990	-146.903	-97.9104	-111.329	-75.1637	-106.438	-107.294	-64.8793
-15.98	-13.2228	-32.0246	-11.9265	7.19125	-15.5905	-28.087	3.84824	-15980	15980	-146.511	-97.5815	-111.075	-74.7113	-106.323	-106.873	-64.6619
-15.97	-13.1724	-31.9392	-11.8961	7.25098	-15.5523	-28.0077	3.89602	-15970	15970	-146.121	-97.2526	-110.881	-74.2836	-106.14	-106.516	-64.4272
-15.96	-13.1277	-31.8663	-11.8758	7.3062	-15.5057	-27.9453	3.93971	-15960	15960	-145.776	-96.9718	-110.751	-73.8883	-105.916	-106.235	-64.2125
-15.95	-13.0907	-31.8072	-11.8658	7.34541	-15.4586	-27.9007	3.97784	-15950	15950	-145.491	-96.7442	-110.687	-73.6075	-105.689	-106.035	-64.0252
-15.94	-13.0647	-31.7496	-11.8715	7.37312	-15.4211	-27.8761	4.00932	-15940	15940	-145.29	-96.5223	-110.724	-73.4092	-105.509	-105.924	-63.8706
-15.93	-13.0502	-31.7053	-11.8937	7.39202	-15.3971	-27.8718	4.03465	-15930	15930	-145.178	-96.3517	-110.866	-73.2738	-105.393	-105.905	-63.7462
-15.92	-13.05	-31.6797	-11.9273	7.40148	-15.3886	-27.8893	4.04654	-15920	15920	-145.176	-96.2531	-111.08	-73.2061	-105.353	-105.983	-63.6878
-15.91	-13.0622	-31.6757	-11.9693	7.39348	-15.3888	-27.9243	4.04403	-15910	15910	-145.271	-96.2377	-111.348	-73.2634	-105.354	-106.141	-63.7001
-15.9	-13.0804	-31.6838	-12.0216	7.38746	-15.3873	-27.964	4.03414	-15900	15900	-145.411	-96.2689	-111.682	-73.3065	-105.346	-106.319	-63.7487
-15.89	-13.1018	-31.6981	-12.0848	7.37744	-15.3849	-28.0018	4.01707	-15890	15890	-145.576	-96.324	-112.086	-73.3782	-105.335	-106.49	-63.8325
-15.88	-13.1235	-31.7147	-12.1527	7.36026	-15.3743	-28.036	3.99567	-15880	15880	-145.744	-96.3879	-112.519	-73.5012	-105.284	-106.643	-63.9377
-15.87	-13.1435	-31.7326	-12.2171	7.33998	-15.3559	-28.0703	3.97312	-15870	15870	-145.898	-96.4569	-112.93	-73.6464	-105.195	-106.798	-64.0484
-15.86	-13.1617	-31.7518	-12.2799	7.31515	-15.3394	-28.1057	3.94903	-15860	15860	-146.039	-96.5308	-113.331	-73.8242	-105.116	-106.957	-64.1668
-15.85	-13.1752	-31.7658	-12.3308	7.27687	-15.3298	-28.1376	3.9257	-15850	15850	-146.143	-96.5847	-113.656	-74.0983	-105.07	-107.101	-64.2814
-15.84	-13.1855	-31.77	-12.3685	7.23759	-15.3236	-28.1592	3.90421	-15840	15840	-146.223	-96.6009	-113.897	-74.3795	-105.04	-107.198	-64.3869
-15.83	-13.1912	-31.7669	-12.4005	7.21782	-15.326	-28.1678	3.88861	-15830	15830	-146.267	-96.589	-114.101	-74.521	-105.052	-107.237	-64.4636
-15.82	-13.1928	-31.7606	-12.4092	7.20956	-15.3219	-28.1627	3.88658	-15820	15820	-146.279	-96.5647	-114.157	-74.5802	-105.032	-107.214	-64.4735
-15.81	-13.1837	-31.7554	-12.416	7.21873	-15.3096	-28.1505	3.89733	-15810	15810	-146.209	-96.5447	-114.2	-74.5145	-104.973	-107.159	-64.4207
-15.8	-13.1727	-31.7533	-12.4165	7.23623	-15.2899	-28.1397	3.91528	-15800	15800	-146.124	-96.5366	-114.203	-74.3892	-104.878	-107.11	-64.3325
-15.79	-13.1581	-31.7548	-12.4144	7.24991	-15.2614	-28.1383	3.94158	-15790	15790	-146.011	-96.5424	-114.19	-74.2913	-104.741	-107.104	-64.2034
-15.78	-13.1422	-31.7572	-12.412	7.26778	-15.2294	-28.1489	3.97575	-15780	15780	-145.888	-96.5516	-114.174	-74.1633	-104.587	-107.152	-64.0355
-15.77	-13.1257	-31.7558	-12.4085	7.29335	-15.2076	-28.1714	4.01173	-15770	15770	-145.761	-96.5462	-114.152	-73.9803	-104.482	-107.253	-63.8588
-15.76	-13.1141	-31.7509	-12.4112	7.31526	-15.2056	-28.1987	4.04203	-15760	15760	-145.671	-96.5273	-114.169	-73.8234	-104.473	-107.376	-63.7099
-15.75	-13.1116	-31.7473	-12.4136	7.33758	-15.2244	-28.2239	4.06235	-15750	15750	-145.652	-96.5135	-114.185	-73.6636	-104.563	-107.489	-63.6101
-15.74	-13.119	-31.744	-12.4267	7.35609	-15.2582	-28.2424	4.07318	-15740	15740	-145.709	-96.5008	-114.268	-73.5311	-104.726	-107.572	-63.5569
-15.73	-13.1336	-31.7399	-12.443	7.36668	-15.298	-28.2541	4.07673	-15730	15730	-145.822	-96.485	-114.372	-73.4553	-104.917	-107.625	-63.5395
-15.72	-13.1563	-31.7376	-12.4664	7.36968	-15.3359	-28.2685	4.06789	-15720	15720	-145.997	-96.4761	-114.522	-73.4338	-105.099	-107.69	-63.5829
-15.71	-13.1835	-31.7394	-12.4958	7.35493	-15.3771	-28.2877	4.04329	-15710	15710	-146.207	-96.4831	-114.709	-73.5394	-105.297	-107.776	-63.7037
-15.7	-13.2089	-31.7421	-12.5211	7.33359	-15.416	-28.3101	4.01041	-15700	15700	-146.403	-96.4935	-114.871	-73.6922	-105.484	-107.877	-63.8652
-15.69	-13.2262	-31.7421	-12.5283	7.31529	-15.4519	-28.3248	3.97895	-15690	15690	-146.537	-96.4935	-114.917	-73.8232	-105.657	-107.943	-64.0198
-15.68	-13.2307	-31.7345	-12.5135	7.30962	-15.4815	-28.3203	3.95374	-15680	15680	-146.572	-96.4642	-114.822	-73.8638	-105.799	-107.923	-64.1436
-15.67	-13.2177	-31.7174	-12.4759	7.32231	-15.4996	-28.2942	3.94469	-15670	15670	-146.471	-96.3983	-114.582	-73.7729	-105.886	-107.805	-64.1881
-15.66	-13.1908	-31.7001	-12.4056	7.35355	-15.5036	-28.2612	3.95954	-15660	15660	-146.263	-96.3317	-114.134	-73.5493	-105.906	-107.657	-64.1151
-15.65	-13.1545	-31.6881	-12.3143	7.3926	-15.4936	-28.2227	3.99349	-15650	15650	-145.983	-96.2855	-113.551	-73.2697	-105.857	-107.484	-63.9484
-15.64	-13.1134	-31.6837	-12.2153	7.43404	-15.4694	-28.1788	4.04198	-15640	15640	-145.666	-96.2685	-112.919	-72.973	-105.741	-107.286	-63.7102
-15.63	-13.0684	-31.6818	-12.1114	7.47821	-15.4361	-28.1349	4.09957	-15630	15630	-145.318	-96.2612	-112.255	-72.6568	-105.581	-107.089	-63.4273
-15.62	-13.0176	-31.6818	-12.0032	7.53741	-15.3967	-28.0854	4.17097	-15620	15620	-144.926	-96.2612	-111.565	-72.2329	-105.392	-106.866	-63.0765
-15.61	-12.9575	-31.6767	-11.8939	7.607	-15.3521	-28.026	4.2552	-15610	15610	-144.462	-96.2416	-110.867	-71.7347	-105.177	-106.598	-62.6628
-15.6	-12.8866	-31.6609	-11.7782	7.68809	-15.2914	-27.9517	4.35079	-15600	15600	-143.915	-96.1807	-110.128	-71.1541	-104.885	-106.264	-62.1932
-15.59	-12.8084	-31.6362	-11.6581	7.77469	-15.2237	-27.8658	4.45237	-15590	15590	-143.311	-96.0856	-109.361	-70.5341	-104.56	-105.878	-61.6942
-15.58	-12.7285	-31.6134	-11.541	7.86722	-15.1462	-27.7813	4.55962	-15580	15580	-142.694	-95.9978	-108.614	-69.8716	-104.187	-105.497	-61.1674
-15.57	-12.6528	-31.5938	-11.4377	7.95178	-15.0608	-27.7116	4.67035	-15570	15570	-142.11	-95.9223	-107.954	-69.2662	-103.776	-105.184	-60.6235
-15.56	-12.5851	-31.5708	-11.3534	8.02438	-14.9696	-27.6616	4.77498	-15560	15560	-141.587	-95.8337	-107.416	-68.7465	-103.338	-104.959	-60.1095
-15.55	-12.5294	-31.55	-11.2919	8.08062	-14.8912	-27.6268	4.86221	-15550	15550	-141.157	-95.7536	-107.024	-68.3438	-102.961	-104.802	-59.681
-15.54	-12.4888	-31.5293	-11.2569	8.12367	-14.8156	-27.6028	4.92557	-15540	15540	-140.843	-95.6739	-106.8	-68.0356	-102.597	-104.694	-59.3698
-15.53	-12.4608	-31.5037	-11.2458	8.15757	-14.776	-27.5825	4.96499	-15530	15530	-140.627	-95.5753	-106.729	-67.7929	-102.407	-104.603	-59.1761
-15.52	-12.441	-31.4657	-11.2516	8.18703	-14.7538	-27.5547	4.98984	-15520	15520	-140.474	-95.4289	-106.766	-67.582	-102.3	-104.478	-59.0541
-15.51	-12.4241	-31.4341	-11.2646	8.21331	-14.7268	-27.5287	5.00604	-15510	15510	-140.344	-95.3072	-106.849	-67.3938	-102.17	-104.361	-58.9745
-15.5	-12.411	-31.4126	-11.2794	8.23729	-14.701	-27.511	5.01925	-15500	15500	-140.243	-95.2244	-106.944	-67.2221	-102.046	-104.281	-58.9096
-15.49	-12.4038	-31.4066	-11.2914	8.25598	-14.6717	-27.5129	5.02542	-15490	15490	-140.187	-95.2013	-107.02	-67.0883	-101.906	-104.29	-58.8793
-15.48	-12.3989	-31.4119	-11.2957	8.26843	-14.6481	-27.533	5.03681	-15480	15480	-140.149	-95.2217	-107.048	-66.9992	-101.792	-104.38	-58.8234
-15.47	-12.3918	-31.42	-11.289	8.28386	-14.6191	-27.5539	5.04661	-15470	15470	-140.094	-95.2529	-107.005	-66.8887	-101.653	-104.474	-58.7752
-15.46	-12.3818	-31.422	-11.2736	8.30432	-14.6009	-27.568	5.05664	-15460	15460	-140.017	-95.2606	-106.907	-66.7422	-101.565	-104.538	-58.7259
-15.45	-12.3705	-31.4187	-11.2551	8.33325	-14.5911	-27.5699	5.07077	-15450	15450	-139.93	-95.2479	-106.789	-66.5351	-101.518	-104.546	-58.6565
-15.44	-12.3606	-31.4113	-11.2354	8.36273	-14.5906	-27.5599	5.08714	-15440	15440	-139.854	-95.2194	-106.663	-66.324	-101.516	-104.501	-58.5761
-15.43	-12.3516	-31.4	-11.2097	8.39314	-14.5906	-27.5413	5.1069	-15430	15430	-139.784	-95.1759	-106.499	-66.1063	-101.516	-104.417	-58.4791
-15.42	-12.3387	-31.3921	-11.1705	8.41784	-14.585	-27.5201	5.13337	-15420	15420	-139.684	-95.1455	-106.249	-65.9295	-101.489	-104.322	-58.349
-15.41	-12.3162	-31.3915	-11.1081	8.44682	-14.5723	-27.5023	5.1657	-15410	15410	-139.511	-95.1431	-105.85	-65.722	-101.428	-104.242	-58.1902
-15.4	-12.2883	-31.3981	-11.0277	8.47839	-14.5477	-27.492	5.21132	-15400	15400	-139.295	-95.1686	-105.337	-65.496	-101.309	-104.196	-57.9661
-15.39	-12.2542	-31.4071	-10.9357	8.5187	-14.5109	-27.488	5.26424	-15390	15390	-139.032	-95.2032	-104.75	-65.2074	-101.132	-104.178	-57.7062
-15.38	-12.2139	-31.4143	-10.8427	8.57092	-14.4708	-27.4866	5.32409	-15380	15380	-138.721	-95.231	-104.156	-64.8335	-100.94	-104.171	-57.4122
-15.37	-12.1709	-31.4161	-10.7606	8.62614	-14.4349	-27.4804	5.38563	-15370	15370	-138.389	-95.2379	-103.632	-64.4382	-100.767	-104.143	-57.1099
-15.36	-12.1342	-31.4055	-10.6964	8.68272	-14.4078	-27.4707	5.4442	-15360	15360	-138.106	-95.1971	-103.222	-64.0331	-100.637	-104.1	-56.8222
-15.35	-12.0996	-31.3776	-10.6535	8.73166	-14.3848	-27.4529	5.49992	-15350	15350	-137.838	-95.0896	-102.948	-63.6827	-100.526	-104.02	-56.5485
-15.34	-12.0677	-31.3398	-10.6209	8.77593	-14.3621	-27.4265	5.55414	-15340	15340	-137.592	-94.944	-102.74	-63.3657	-100.417	-103.901	-56.2821
-15.33	-12.038	-31.3028	-10.5915	8.81518	-14.3417	-27.3965	5.60322	-15330	15330	-137.363	-94.8015	-102.552	-63.0847	-100.319	-103.766	-56.041
-15.32	-12.0123	-31.2692	-10.5664	8.84632	-14.3241	-27.3634	5.64015	-15320	15320	-137.164	-94.6721	-102.392	-62.8618	-100.234	-103.617	-55.8596
-15.31	-11.9864	-31.2334	-10.5414	8.86666	-14.3054	-27.3222	5.66715	-15310	15310	-136.964	-94.5342	-102.232	-62.7162	-100.144	-103.431	-55.727
-15.3	-11.9594	-31.1893	-10.5169	8.88133	-14.2825	-27.271	5.68759	-15300	15300	-136.756	-94.3644	-102.076	-62.6111	-100.034	-103.201	-55.6266
-15.29	-11.9305	-31.1384	-10.5003	8.89461	-14.2573	-27.2148	5.70487	-15290	15290	-136.533	-94.1683	-101.97	-62.516	-99.9129	-102.948	-55.5417
-15.28	-11.905	-31.0861	-10.4979	8.90617	-14.2335	-27.1605	5.71937	-15280	15280	-136.336	-93.9669	-101.955	-62.4333	-99.7985	-102.704	-55.4705
-15.27	-11.8918	-31.0369	-10.5118	8.91322	-14.2112	-27.1135	5.73315	-15270	15270	-136.234	-93.7774	-102.043	-62.3828	-99.6913	-102.492	-55.4028
-15.26	-11.8804	-30.999	-10.5323	8.91496	-14.189	-27.0766	5.7421	-15260	15260	-136.146	-93.6315	-102.174	-62.3703	-99.5845	-102.326	-55.3588
-15.25	-11.8687	-30.9727	-10.5451	8.91459	-14.1653	-27.0382	5.74862	-15250	15250	-136.056	-93.5302	-102.256	-62.373	-99.4706	-102.154	-55.3268
-15.24	-11.8606	-30.9618	-10.5517	8.91247	-14.1383	-27.0203	5.74985	-15240	15240	-135.993	-93.4882	-102.298	-62.3882	-99.3407	-102.073	-55.3207
-15.23	-11.8531	-30.9644	-10.5539	8.9079	-14.1064	-27.0086	5.74845	-15230	15230	-135.935	-93.4982	-102.312	-62.4209	-99.1874	-102.02	-55.3276
-15.22	-11.8468	-30.9768	-10.5499	8.90647	-14.0667	-27.007	5.74837	-15220	15220	-135.887	-93.546	-102.287	-62.4311	-98.9965	-102.013	-55.328
-15.21	-11.8376	-30.9979	-10.5378	8.91091	-14.0198	-27.0155	5.75473	-15210	15210	-135.815	-93.6272	-102.209	-62.3993	-98.7709	-102.051	-55.2968
-15.2	-11.8251	-31.0171	-10.5184	8.92168	-13.9693	-27.0279	5.76872	-15200	15200	-135.719	-93.7012	-102.085	-62.3222	-98.5281	-102.107	-55.2281
-15.19	-11.8103	-31.0254	-10.5	8.93818	-13.9182	-27.0383	5.78815	-15190	15190	-135.605	-93.7331	-101.968	-62.2041	-98.2824	-102.154	-55.1326
-15.18	-11.7941	-31.0204	-10.4816	8.96184	-13.8743	-27.0362	5.81132	-15180	15180	-135.48	-93.7139	-101.851	-62.0347	-98.0713	-102.145	-55.0188
-15.17	-11.7743	-31.0065	-10.4605	8.99291	-13.8412	-27.0251	5.83965	-15170	15170	-135.327	-93.6603	-101.716	-61.8123	-97.9122	-102.095	-54.8796
-15.16	-11.7556	-30.9984	-10.4383	9.0273	-13.8224	-27.0153	5.86907	-15160	15160	-135.182	-93.6291	-101.574	-61.5661	-97.8218	-102.05	-54.7351
-15.15	-11.7424	-30.9968	-10.4173	9.05957	-13.8197	-27.012	5.89521	-15150	15150	-135.08	-93.623	-101.44	-61.335	-97.8088	-102.036	-54.6067
-15.14	-11.7368	-31.004	-10.3972	9.08645	-13.8274	-27.0177	5.91352	-15140	15140	-135.037	-93.6507	-101.312	-61.1426	-97.8458	-102.061	-54.5168
-15.13	-11.7348	-31.0118	-10.3711	9.10913	-13.8445	-27.0218	5.92482	-15130	15130	-135.022	-93.6808	-101.145	-60.9802	-97.928	-102.08	-54.4613
-15.12	-11.7334	-31.0132	-10.3348	9.12754	-13.8739	-27.0184	5.92307	-15120	15120	-135.011	-93.6861	-100.913	-60.8484	-98.0694	-102.064	-54.4699
-15.11	-11.7333	-31.0063	-10.2907	9.14065	-13.9126	-27.0009	5.90911	-15110	15110	-135.01	-93.6596	-100.632	-60.7545	-98.2555	-101.986	-54.5384
-15.1	-11.7337	-30.9978	-10.2435	9.15228	-13.9537	-26.9774	5.89555	-15100	15100	-135.013	-93.6268	-100.33	-60.6713	-98.4531	-101.88	-54.605
-15.09	-11.7353	-30.994	-10.1977	9.1682	-13.9928	-26.9534	5.88452	-15090	15090	-135.026	-93.6122	-100.038	-60.5573	-98.6411	-101.772	-54.6592
-15.08	-11.7347	-30.9947	-10.1498	9.19467	-14.0153	-26.9294	5.88501	-15080	15080	-135.021	-93.6149	-99.7323	-60.3678	-98.7493	-101.664	-54.6568
-15.07	-11.7239	-30.9902	-10.0885	9.241	-13.9892	-26.8976	5.91564	-15070	15070	-134.938	-93.5976	-99.341	-60.0361	-98.6238	-101.521	-54.5063
-15.06	-11.6717	-30.9645	-9.99283	9.31913	-13.9039	-26.8386	5.98787	-15060	15060	-134.535	-93.4986	-98.7302	-59.4767	-98.2137	-101.255	-54.1515
-15.05	-11.5501	-30.9027	-9.83664	9.43217	-13.7505	-26.7343	6.10668	-15050	15050	-133.596	-93.2606	-97.733	-58.6674	-97.4761	-100.786	-53.5679
-15.04	-11.382	-30.8015	-9.62874	9.57632	-13.5436	-26.5836	6.26413	-15040	15040	-132.298	-92.8708	-96.4058	-57.6353	-96.4812	-100.108	-52.7945
-15.03	-11.1943	-30.6581	-9.38854	9.74253	-13.3177	-26.3963	6.43899	-15030	15030	-130.849	-92.3185	-94.8723	-56.4454	-95.395	-99.2651	-51.9355
-15.02	-10.9902	-30.4871	-9.13509	9.92214	-13.0863	-26.188	6.62278	-15020	15020	-129.273	-91.6599	-93.2543	-55.1594	-94.2824	-98.3278	-51.0327
-15.01	-10.7802	-30.301	-8.8769	10.1097	-12.8493	-25.9738	6.81853	-15010	15010	-127.651	-90.9432	-91.6059	-53.8166	-93.1428	-97.3639	-50.0712
-15	-10.5657	-30.107	-8.61819	10.3042	-12.6039	-25.7615	7.0266	-15000	15000	-125.995	-90.196	-89.9543	-52.4241	-91.9628	-96.4086	-49.0491
-14.99	-10.3503	-29.9196	-8.36823	10.5042	-12.3509	-25.5595	7.24575	-14990	14990	-124.332	-89.4742	-88.3585	-50.9922	-90.7463	-95.4996	-47.9726
-14.98	-10.1367	-29.7361	-8.12947	10.7033	-12.0961	-25.3709	7.46605	-14980	14980	-122.683	-88.7675	-86.8342	-49.5667	-89.5211	-94.651	-46.8904
-14.97	-9.92789	-29.5589	-7.89963	10.893	-11.8548	-25.1924	7.67232	-14970	14970	-121.071	-88.085	-85.3669	-48.2086	-88.3609	-93.8477	-45.8772
-14.96	-9.7308	-29.3869	-7.67461	11.0565	-11.6506	-25.0097	7.85075	-14960	14960	-119.549	-87.4226	-83.9303	-47.038	-87.379	-93.0256	-45.0007
-14.95	-9.54892	-29.204	-7.45706	11.1909	-11.4876	-24.8166	7.98613	-14950	14950	-118.145	-86.7181	-82.5415	-46.0758	-86.5953	-92.1567	-44.3357
-14.94	-9.39517	-29.0296	-7.26476	11.2886	-11.3641	-24.6238	8.08598	-14940	14940	-116.958	-86.0465	-81.3138	-45.3763	-86.0014	-91.2891	-43.8452
-14.93	-9.28074	-28.8767	-7.09541	11.3584	-11.2727	-24.4525	8.15483	-14930	14930	-116.074	-85.4576	-80.2327	-44.8765	-85.5619	-90.5183	-43.507
-14.92	-9.19196	-28.749	-6.95281	11.4037	-11.1981	-24.3151	8.2028	-14920	14920	-115.389	-84.9657	-79.3223	-44.5522	-85.2032	-89.9	-43.2713
-14.91	-9.11397	-28.6395	-6.8235	11.4414	-11.1268	-24.1972	8.24149	-14910	14910	-114.787	-84.544	-78.4967	-44.2823	-84.8604	-89.3695	-43.0813
-14.9	-9.0359	-28.5379	-6.70152	11.4762	-11.0557	-24.08	8.27639	-14900	14900	-114.184	-84.1527	-77.718	-44.0331	-84.5185	-88.8421	-42.9098
-14.89	-8.95461	-28.4381	-6.58295	11.509	-10.9841	-23.9562	8.30517	-14890	14890	-113.556	-83.7683	-76.961	-43.7983	-84.1743	-88.285	-42.7685
-14.88	-8.87357	-28.3387	-6.4557	11.5334	-10.9137	-23.8226	8.32903	-14880	14880	-112.93	-83.3855	-76.1487	-43.6236	-83.8358	-87.6839	-42.6513
-14.87	-8.79744	-28.2421	-6.33153	11.5567	-10.8494	-23.6857	8.3553	-14870	14870	-112.343	-83.0135	-75.3559	-43.4568	-83.5266	-87.0678	-42.5222
-14.86	-8.72491	-28.147	-6.2171	11.5786	-10.7978	-23.5457	8.38162	-14860	14860	-111.783	-82.6472	-74.6254	-43.3	-83.2785	-86.4379	-42.3929
-14.85	-8.65687	-28.0552	-6.10825	11.6022	-10.7536	-23.4057	8.40848	-14850	14850	-111.257	-82.2936	-73.9305	-43.131	-83.0659	-85.8079	-42.261
-14.84	-8.59376	-27.9718	-6.0037	11.6261	-10.7148	-23.276	8.43472	-14840	14840	-110.77	-81.9724	-73.263	-42.9599	-82.8794	-85.2243	-42.1321
-14.83	-8.53556	-27.9021	-5.90644	11.6486	-10.6786	-23.1645	8.45739	-14830	14830	-110.321	-81.704	-72.6421	-42.7988	-82.7053	-84.7225	-42.0207
-14.82	-8.48415	-27.8452	-5.82104	11.6685	-10.644	-23.0715	8.47282	-14820	14820	-109.924	-81.4848	-72.0969	-42.6564	-82.5389	-84.304	-41.9449
-14.81	-8.44684	-27.8107	-5.74925	11.6812	-10.619	-23.0049	8.47578	-14810	14810	-109.636	-81.352	-71.6386	-42.5654	-82.4187	-84.0043	-41.9304
-14.8	-8.42784	-27.8054	-5.69146	11.68	-10.6116	-22.9634	8.4632	-14800	14800	-109.489	-81.3315	-71.2696	-42.574	-82.3832	-83.8176	-41.9922
-14.79	-8.42603	-27.8147	-5.64934	11.6654	-10.6187	-22.9371	8.43402	-14790	14790	-109.475	-81.3674	-71.0007	-42.6786	-82.4173	-83.6993	-42.1355
-14.78	-8.43235	-27.8301	-5.62282	11.644	-10.6333	-22.9238	8.39325	-14780	14780	-109.524	-81.4267	-70.8314	-42.8318	-82.4875	-83.6394	-42.3358
-14.77	-8.44179	-27.8467	-5.60449	11.6226	-10.6443	-22.9189	8.35054	-14770	14770	-109.597	-81.4906	-70.7144	-42.985	-82.5404	-83.6174	-42.5456
-14.76	-8.44691	-27.8574	-5.5868	11.6047	-10.6475	-22.9201	8.31372	-14760	14760	-109.636	-81.5318	-70.6015	-43.1132	-82.5558	-83.6228	-42.7265
-14.75	-8.44876	-27.8624	-5.56832	11.5884	-10.6383	-22.929	8.2896	-14750	14750	-109.65	-81.5511	-70.4835	-43.2299	-82.5115	-83.6628	-42.8449
-14.74	-8.4458	-27.8595	-5.55167	11.5727	-10.6165	-22.9399	8.27902	-14740	14740	-109.628	-81.5399	-70.3772	-43.3423	-82.4067	-83.7119	-42.8969
-14.73	-8.43963	-27.8469	-5.54025	11.5596	-10.5858	-22.9534	8.27843	-14730	14730	-109.58	-81.4914	-70.3043	-43.436	-82.2591	-83.7726	-42.8998
-14.72	-8.43218	-27.8291	-5.53727	11.5475	-10.5561	-22.9594	8.28046	-14720	14720	-109.522	-81.4228	-70.2853	-43.5227	-82.1163	-83.7996	-42.8898
-14.71	-8.42824	-27.805	-5.54523	11.5379	-10.5332	-22.9717	8.2811	-14710	14710	-109.492	-81.33	-70.3361	-43.5914	-82.0062	-83.8549	-42.8867
-14.7	-8.41944	-27.7679	-5.55957	11.5331	-10.5169	-22.9757	8.28532	-14700	14700	-109.424	-81.1871	-70.4276	-43.6258	-81.9278	-83.8729	-42.866
-14.69	-8.40366	-27.7115	-5.57544	11.5365	-10.4986	-22.9681	8.29531	-14690	14690	-109.302	-80.9699	-70.529	-43.6014	-81.8398	-83.8388	-42.8169
-14.68	-8.38404	-27.6363	-5.59258	11.5452	-10.4769	-22.9496	8.31344	-14680	14680	-109.151	-80.6803	-70.6384	-43.5391	-81.7355	-83.7555	-42.7278
-14.67	-8.35863	-27.5512	-5.61203	11.5615	-10.4491	-22.9238	8.3409	-14670	14670	-108.955	-80.3525	-70.7626	-43.4224	-81.6018	-83.6394	-42.593
-14.66	-8.33094	-27.4677	-5.63543	11.5822	-10.4243	-22.9028	8.37447	-14660	14660	-108.741	-80.0309	-70.9119	-43.2742	-81.4825	-83.5449	-42.4281
-14.65	-8.30319	-27.387	-5.66496	11.6018	-10.3983	-22.8791	8.41089	-14650	14650	-108.527	-79.7201	-71.1005	-43.1339	-81.3575	-83.4383	-42.2491
-14.64	-8.27866	-27.306	-5.69928	11.6182	-10.3706	-22.8554	8.44456	-14640	14640	-108.337	-79.4081	-71.3196	-43.0165	-81.2243	-83.3316	-42.0838
-14.63	-8.25737	-27.2235	-5.73512	11.6354	-10.3536	-22.8299	8.4706	-14630	14630	-108.173	-79.0904	-71.5484	-42.8934	-81.1426	-83.2169	-41.9558
-14.62	-8.23391	-27.1357	-5.76709	11.6551	-10.3432	-22.8052	8.48854	-14620	14620	-107.992	-78.7522	-71.7525	-42.7523	-81.0926	-83.1057	-41.8677
-14.61	-8.20419	-27.0398	-5.78649	11.6765	-10.3301	-22.7694	8.50172	-14610	14610	-107.762	-78.3829	-71.8763	-42.5991	-81.0296	-82.9446	-41.803
-14.6	-8.16484	-26.945	-5.78813	11.7029	-10.3075	-22.7288	8.51436	-14600	14600	-107.458	-78.0178	-71.8868	-42.4101	-80.9209	-82.7619	-41.7409
-14.59	-8.11538	-26.854	-5.77324	11.7339	-10.2692	-22.683	8.5327	-14590	14590	-107.076	-77.6673	-71.7917	-42.1881	-80.7368	-82.5558	-41.6508
-14.58	-8.06238	-26.7679	-5.74046	11.7658	-10.2185	-22.6283	8.55721	-14580	14580	-106.667	-77.3357	-71.5825	-41.9598	-80.493	-82.3097	-41.5304
-14.57	-8.00889	-26.6909	-5.70767	11.7967	-10.1717	-22.5724	8.58598	-14570	14570	-106.254	-77.0391	-71.3731	-41.7385	-80.268	-82.0582	-41.3891
-14.56	-7.95879	-26.6199	-5.67162	11.8273	-10.1296	-22.5152	8.61356	-14560	14560	-105.867	-76.7657	-71.143	-41.5194	-80.0655	-81.8008	-41.2536
-14.55	-7.9119	-26.5516	-5.63451	11.8563	-10.1059	-22.4523	8.63722	-14550	14550	-105.505	-76.5026	-70.9061	-41.3118	-79.9516	-81.5177	-41.1374
-14.54	-7.86852	-26.4895	-5.59247	11.885	-10.0959	-22.397	8.65648	-14540	14540	-105.17	-76.2635	-70.6377	-41.1063	-79.9035	-81.2689	-41.0428
-14.53	-7.82596	-26.429	-5.54271	11.9148	-10.0886	-22.3429	8.67502	-14530	14530	-104.842	-76.0304	-70.32	-40.893	-79.8684	-81.0255	-40.9517
-14.52	-7.78179	-26.3738	-5.48649	11.942	-10.0702	-22.2877	8.69425	-14520	14520	-104.501	-75.8178	-69.9611	-40.6983	-79.7799	-80.7771	-40.8572
-14.51	-7.73801	-26.3301	-5.42837	11.9708	-10.0364	-22.2395	8.71454	-14510	14510	-104.163	-75.6495	-69.59	-40.4921	-79.6174	-80.5602	-40.7576
-14.5	-7.69883	-26.3007	-5.37579	11.999	-10.0024	-22.198	8.73781	-14500	14500	-103.86	-75.5363	-69.2544	-40.2902	-79.4539	-80.3734	-40.6432
-14.49	-7.66696	-26.2766	-5.3426	12.031	-9.97204	-22.1696	8.76325	-14490	14490	-103.614	-75.4435	-69.0425	-40.0611	-79.3079	-80.2456	-40.5183
-14.48	-7.63882	-26.2552	-5.32148	12.0655	-9.9464	-22.144	8.79358	-14480	14480	-103.397	-75.3611	-68.9076	-39.8141	-79.1846	-80.1304	-40.3693
-14.47	-7.61382	-26.2449	-5.30881	12.1087	-9.93073	-22.1349	8.83125	-14470	14470	-103.204	-75.3214	-68.8268	-39.5048	-79.1093	-80.0895	-40.1842
-14.46	-7.59097	-26.2299	-5.30304	12.1608	-9.92519	-22.1263	8.87727	-14460	14460	-103.028	-75.2636	-68.7899	-39.1318	-79.0827	-80.0508	-39.9582
-14.45	-7.56848	-26.2107	-5.29275	12.2219	-9.92124	-22.1242	8.92912	-14450	14450	-102.854	-75.1897	-68.7242	-38.6943	-79.0637	-80.0413	-39.7035
-14.44	-7.54615	-26.193	-5.26942	12.2824	-9.91144	-22.1243	8.98684	-14440	14440	-102.681	-75.1215	-68.5753	-38.2612	-79.0165	-80.0418	-39.42
-14.43	-7.51894	-26.1852	-5.23075	12.3385	-9.89102	-22.1164	9.04498	-14430	14430	-102.471	-75.0915	-68.3284	-37.8595	-78.9184	-80.0062	-39.1344
-14.42	-7.4837	-26.1687	-5.18174	12.3944	-9.85834	-22.0921	9.10677	-14420	14420	-102.199	-75.0279	-68.0155	-37.4593	-78.7612	-79.8969	-38.8308
-14.41	-7.437	-26.1318	-5.12731	12.4533	-9.81293	-22.0478	9.1778	-14410	14410	-101.839	-74.8858	-67.668	-37.0376	-78.5429	-79.6976	-38.4819
-14.4	-7.37752	-26.0736	-5.07262	12.5186	-9.75069	-21.9808	9.25396	-14400	14400	-101.379	-74.6616	-67.3189	-36.5701	-78.2436	-79.3961	-38.1078
-14.39	-7.30513	-25.9855	-5.01594	12.5938	-9.67507	-21.896	9.33326	-14390	14390	-100.821	-74.3223	-66.957	-36.0317	-77.88	-79.0145	-37.7183
-14.38	-7.22533	-25.8792	-4.95678	12.6718	-9.59243	-21.7985	9.41048	-14380	14380	-100.204	-73.9129	-66.5794	-35.4732	-77.4826	-78.5757	-37.3389
-14.37	-7.14395	-25.7689	-4.89566	12.7454	-9.50442	-21.6918	9.48224	-14370	14370	-99.5761	-73.4881	-66.1892	-34.9463	-77.0595	-78.0956	-36.9864
-14.36	-7.06651	-25.6593	-4.82951	12.8047	-9.41994	-21.5814	9.54546	-14360	14360	-98.9782	-73.066	-65.7668	-34.5217	-76.6532	-77.5988	-36.6759
-14.35	-6.99505	-25.5586	-4.75828	12.8494	-9.33845	-21.4797	9.59641	-14350	14350	-98.4265	-72.6782	-65.3121	-34.2017	-76.2614	-77.1412	-36.4256
-14.34	-6.93118	-25.4732	-4.68968	12.8741	-9.25445	-21.3796	9.63337	-14340	14340	-97.9333	-72.3492	-64.8741	-34.0249	-75.8575	-76.6908	-36.2441
-14.33	-6.87769	-25.3984	-4.63481	12.8853	-9.16826	-21.3024	9.65934	-14330	14330	-97.5203	-72.0612	-64.5239	-33.9447	-75.4431	-76.3434	-36.1165
-14.32	-6.83415	-25.3307	-4.59446	12.8816	-9.08755	-21.2357	9.67249	-14320	14320	-97.1842	-71.8004	-64.2663	-33.9712	-75.055	-76.0432	-36.0519
-14.31	-6.79641	-25.2689	-4.56584	12.8745	-9.00913	-21.1824	9.67976	-14310	14310	-96.8928	-71.5624	-64.0835	-34.022	-74.6779	-75.8034	-36.0162
-14.3	-6.76516	-25.2153	-4.55356	12.8628	-8.9414	-21.1391	9.68019	-14300	14300	-96.6515	-71.356	-64.0051	-34.1058	-74.3523	-75.6085	-36.0141
-14.29	-6.74652	-25.1781	-4.55198	12.8442	-8.89365	-21.1085	9.67026	-14290	14290	-96.5076	-71.2127	-63.9951	-34.2389	-74.1227	-75.4709	-36.0629
-14.28	-6.74482	-25.1674	-4.55607	12.8179	-8.86819	-21.0933	9.65042	-14280	14280	-96.4945	-71.1715	-64.0212	-34.4272	-74.0002	-75.4025	-36.1603
-14.27	-6.76211	-25.1841	-4.56466	12.786	-8.87118	-21.0995	9.61318	-14270	14270	-96.6279	-71.2358	-64.076	-34.6556	-74.0146	-75.4304	-36.3432
-14.26	-6.796	-25.2259	-4.58121	12.7479	-8.9012	-21.124	9.56965	-14260	14260	-96.8896	-71.3968	-64.1817	-34.9284	-74.159	-75.5406	-36.5571
-14.25	-6.84171	-25.2865	-4.60517	12.7105	-8.94884	-21.1581	9.52627	-14250	14250	-97.2425	-71.6302	-64.3346	-35.1962	-74.388	-75.694	-36.7702
-14.24	-6.89165	-25.3566	-4.62979	12.6732	-9.005	-21.1949	9.48714	-14240	14240	-97.6281	-71.9002	-64.4918	-35.4632	-74.6581	-75.8596	-36.9624
[truncated: 1,427 more rows]

[truncated: 4 more sheets: J-input_Liu_Trace21ann_NCUS_tas, J_Liu_Trace21ann_EAST_tas_land_, J-input_Liu_Trace21ann_EAST_tas, G_lme_full10_aave_EAST_NCUS]
